# Supplementary material
Source: publisher figshare collection journal article supplement (https://acs.figshare.com/ndownloader/files/7697443)
Supplement: Supplementary file 1 [file 7697443]

data_pl510
_audit_creation_date              2016-02-03
_audit_creation_method
;
Olex2 1.2
(compiled 2015.09.30 svn.r3233 for OlexSys, GUI svn.r5103)
;
_publ_contact_author_address      ?
_publ_contact_author_email        ?
_publ_contact_author_name         ''
_publ_contact_author_phone        ?
_publ_section_references
;
Dolomanov, O.V., Bourhis, L.J., Gildea, R.J, Howard, J.A.K. & Puschmann, H.
 (2009), J. Appl. Cryst. 42, 339-341.

Sheldrick, G.M. (2008). Acta Cryst. A64, 112-122.

Sheldrick, G.M. (2015). Acta Cryst. A71, 3-8.
;
_chemical_name_common             ?
_chemical_name_systematic         ?
_chemical_formula_moiety
'C43 H44 Mo N2 O P2, C4 H10 O, 2(F6 Sb), C2 H3 N'
_chemical_formula_sum             'C49 H57 F12 Mo N3 O2 P2 Sb2'
_chemical_formula_weight          1349.35
_chemical_melting_point           ?
loop_
  _atom_type_symbol
  _atom_type_description
  _atom_type_scat_dispersion_real
  _atom_type_scat_dispersion_imag
  _atom_type_scat_source
 'C' 'C' 0.0033 0.0016 'International Tables Vol C Tables 4.2.6.8 and 6.1.1.4'
 'H' 'H' 0.0000 0.0000 'International Tables Vol C Tables 4.2.6.8 and 6.1.1.4'
 'F' 'F' 0.0171 0.0103 'International Tables Vol C Tables 4.2.6.8 and 6.1.1.4'
 'Mo' 'Mo' -1.6832 0.6857
 'International Tables Vol C Tables 4.2.6.8 and 6.1.1.4'
 'N' 'N' 0.0061 0.0033 'International Tables Vol C Tables 4.2.6.8 and 6.1.1.4'
 'O' 'O' 0.0106 0.0060 'International Tables Vol C Tables 4.2.6.8 and 6.1.1.4'
 'P' 'P' 0.1023 0.0942 'International Tables Vol C Tables 4.2.6.8 and 6.1.1.4'
 'Sb' 'Sb' -0.5866 1.5461
 'International Tables Vol C Tables 4.2.6.8 and 6.1.1.4'

_shelx_space_group_comment
;
The symmetry employed for this shelxl refinement is uniquely defined
by the following loop, which should always be used as a source of
symmetry information in preference to the above space-group names.
They are only intended as comments.
;
_space_group_crystal_system       'monoclinic'
_space_group_IT_number            14
_space_group_name_H-M_alt         'P 1 21/c 1'
_space_group_name_Hall            '-P 2ybc'
loop_
  _space_group_symop_operation_xyz
 'x, y, z'
 '-x, y+1/2, -z+1/2'
 '-x, -y, -z'
 'x, -y-1/2, z-1/2'

_cell_length_a                    15.3956(17)
_cell_length_b                    29.745(3)
_cell_length_c                    12.4075(13)
_cell_angle_alpha                 90
_cell_angle_beta                  107.635(3)
_cell_angle_gamma                 90
_cell_volume                      5414.8(10)
_cell_formula_units_Z             4
_cell_measurement_reflns_used     9946
_cell_measurement_temperature     90(2)
_cell_measurement_theta_max       27.86
_cell_measurement_theta_min       2.31
_shelx_estimated_absorpt_T_max    ?
_shelx_estimated_absorpt_T_min    ?
_exptl_absorpt_coefficient_mu     1.359
_exptl_absorpt_correction_T_max   0.960
_exptl_absorpt_correction_T_min   0.822
_exptl_absorpt_correction_type    multi-scan
_exptl_absorpt_process_details
;
SADABS-2014/5 (Bruker,2014/5) was used for absorption correction.
wR2(int) was 0.0519 before and 0.0440 after correction.
The Ratio of minimum to maximum transmission is 0.8564.
The \l/2 correction factor is 0.00150.
;
_exptl_absorpt_special_details    ?
_exptl_crystal_colour             yellow
_exptl_crystal_colour_primary     yellow
_exptl_crystal_density_diffrn     1.655
_exptl_crystal_density_meas       ?
_exptl_crystal_density_method     ?
_exptl_crystal_description        'blade'
_exptl_crystal_F_000              2680
_exptl_crystal_size_max           0.15
_exptl_crystal_size_mid           0.10
_exptl_crystal_size_min           0.03
_exptl_transmission_factor_max    ?
_exptl_transmission_factor_min    ?
_diffrn_reflns_av_R_equivalents   0.0434
_diffrn_reflns_av_unetI/netI      0.0532
_diffrn_reflns_Laue_measured_fraction_full 1.000
_diffrn_reflns_Laue_measured_fraction_max 0.998
_diffrn_reflns_limit_h_max        20
_diffrn_reflns_limit_h_min        -20
_diffrn_reflns_limit_k_max        39
_diffrn_reflns_limit_k_min        -38
_diffrn_reflns_limit_l_max        13
_diffrn_reflns_limit_l_min        -16
_diffrn_reflns_number             40026
_diffrn_reflns_point_group_measured_fraction_full 1.000
_diffrn_reflns_point_group_measured_fraction_max 0.998
_diffrn_reflns_theta_full         26.000
_diffrn_reflns_theta_max          27.887
_diffrn_reflns_theta_min          1.369
_diffrn_ambient_temperature       90(2)
_diffrn_detector                  'Bruker APEX2 area detector'
_diffrn_detector_area_resol_mean  7.9
_diffrn_detector_type             'CCD area detector'
_diffrn_measured_fraction_theta_full 1.000
_diffrn_measured_fraction_theta_max 0.998
_diffrn_measurement_device        'Bruker D8 Kappa diffractometer'
_diffrn_measurement_device_type   'Bruker APEX II area detector'
_diffrn_measurement_method        '\f and \w scans'
_diffrn_radiation_monochromator   'TRIUMPH curved-crystal'
_diffrn_radiation_probe           x-ray
_diffrn_radiation_type            MoK\a
_diffrn_radiation_wavelength      0.71073
_diffrn_source                    'sealed X-ray tube'
_diffrn_standards_number          0
_reflns_Friedel_coverage          0.000
_reflns_Friedel_fraction_full     .
_reflns_Friedel_fraction_max      .
_reflns_number_gt                 10006
_reflns_number_total              12898
_reflns_special_details
;
 Reflections were merged by SHELXL according to the crystal
 class for the calculation of statistics and refinement.
 
 _reflns_Friedel_fraction is defined as the number of unique
 Friedel pairs measured divided by the number that would be
 possible theoretically, ignoring centric projections and
 systematic absences.
;
_reflns_threshold_expression      'I > 2\s(I)'
_computing_cell_refinement        'SAINT v8.34A (Bruker, 2013)'
_computing_data_collection        ?
_computing_data_reduction         'SAINT v8.34A (Bruker, 2013)'
_computing_molecular_graphics     'Olex2 (Dolomanov et al., 2009)'
_computing_publication_material   'Olex2 (Dolomanov et al., 2009)'
_computing_structure_refinement   'XL (Sheldrick, 2008)'
_computing_structure_solution     'XT (Sheldrick, 2015)'
_refine_diff_density_max          1.291
_refine_diff_density_min          -0.851
_refine_diff_density_rms          0.110
_refine_ls_extinction_coef        .
_refine_ls_extinction_method      none
_refine_ls_goodness_of_fit_ref    1.053
_refine_ls_hydrogen_treatment     constr
_refine_ls_matrix_type            full
_refine_ls_number_parameters      648
_refine_ls_number_reflns          12898
_refine_ls_number_restraints      0
_refine_ls_R_factor_all           0.0612
_refine_ls_R_factor_gt            0.0393
_refine_ls_restrained_S_all       1.053
_refine_ls_shift/su_max           0.003
_refine_ls_shift/su_mean          0.000
_refine_ls_structure_factor_coef  Fsqd
_refine_ls_weighting_details
'w=1/[\s^2^(Fo^2^)+(0.0169P)^2^+8.1454P] where P=(Fo^2^+2Fc^2^)/3'
_refine_ls_weighting_scheme       calc
_refine_ls_wR_factor_gt           0.0653
_refine_ls_wR_factor_ref          0.0709
_refine_special_details           ?
_olex2_refinement_description
;
1. Fixed Uiso
 At 1.2 times of:
  All C(H) groups, All C(H,H) groups
 At 1.5 times of:
  All C(H,H,H) groups
2.a Secondary CH2 refined with riding coordinates:
 C11(H11A,H11B), C12(H12A,H12B), C45(H45A,H45B), C46(H46A,H46B)
2.b Aromatic/amide H refined with riding coordinates:
 C14(H14), C15(H15), C16(H16), C17(H17), C18(H18), C20(H20), C21(H21),
 C22(H22), C23(H23), C24(H24), C26(H26), C27(H27), C28(H28), C29(H29), C30(H30),
  C32(H32), C33(H33), C34(H34), C35(H35), C36(H36), C39(H39), C40(H40),
 C41(H41), C42(H42), C43(H43)
2.c Idealised Me refined as rotating group:
 C6(H6A,H6B,H6C), C7(H7A,H7B,H7C), C8(H8A,H8B,H8C), C9(H9A,H9B,H9C), C10(H10A,
 H10B,H10C), C44(H44A,H44B,H44C), C47(H47B,H47A,H47C), C48(H48A,H48B,H48C)
;
_atom_sites_solution_hydrogens    geom
_atom_sites_solution_primary      ?
_atom_sites_solution_secondary    ?
loop_
  _atom_site_label
  _atom_site_type_symbol
  _atom_site_fract_x
  _atom_site_fract_y
  _atom_site_fract_z
  _atom_site_U_iso_or_equiv
  _atom_site_adp_type
  _atom_site_occupancy
  _atom_site_site_symmetry_order
  _atom_site_calc_flag
  _atom_site_refinement_flags_posn
  _atom_site_refinement_flags_adp
  _atom_site_refinement_flags_occupancy
  _atom_site_disorder_assembly
  _atom_site_disorder_group
 Mo1 Mo 0.75976(2) 0.64132(2) 0.54150(2) 0.01031(6) Uani 1 1 d . . . . .
 P1 P 0.82087(6) 0.58382(3) 0.69773(7) 0.01178(17) Uani 1 1 d . . . . .
 P2 P 0.62871(6) 0.58347(3) 0.52448(7) 0.01174(17) Uani 1 1 d . . . . .
 O1 O 0.75169(19) 0.70395(8) 0.7236(2) 0.0279(6) Uani 1 1 d . . . . .
 N1 N 0.74804(19) 0.67594(9) 0.6549(2) 0.0159(6) Uani 1 1 d . . . . .
 N2 N 0.64066(19) 0.67315(9) 0.4317(2) 0.0150(6) Uani 1 1 d . . . . .
 C1 C 0.9062(2) 0.62688(11) 0.5136(3) 0.0144(7) Uani 1 1 d . . . . .
 C2 C 0.8409(2) 0.62703(11) 0.4038(3) 0.0151(7) Uani 1 1 d . . . . .
 C3 C 0.8033(2) 0.67088(11) 0.3840(3) 0.0142(7) Uani 1 1 d . . . . .
 C4 C 0.8399(2) 0.69745(11) 0.4842(3) 0.0153(7) Uani 1 1 d . . . . .
 C5 C 0.9044(2) 0.67020(11) 0.5643(3) 0.0148(7) Uani 1 1 d . . . . .
 C6 C 0.9812(2) 0.59324(11) 0.5557(3) 0.0200(8) Uani 1 1 d . . . . .
 H6A H 0.9961 0.5904 0.6380 0.030 Uiso 1 1 calc GR . . . .
 H6B H 1.0352 0.6033 0.5363 0.030 Uiso 1 1 calc GR . . . .
 H6C H 0.9612 0.5640 0.5203 0.030 Uiso 1 1 calc GR . . . .
 C7 C 0.8302(2) 0.59173(12) 0.3133(3) 0.0211(8) Uani 1 1 d . . . . .
 H7A H 0.8602 0.5639 0.3477 0.032 Uiso 1 1 calc GR . . . .
 H7B H 0.8583 0.6024 0.2569 0.032 Uiso 1 1 calc GR . . . .
 H7C H 0.7653 0.5860 0.2766 0.032 Uiso 1 1 calc GR . . . .
 C8 C 0.7449(3) 0.68804(13) 0.2733(3) 0.0246(8) Uani 1 1 d . . . . .
 H8A H 0.7003 0.6650 0.2365 0.037 Uiso 1 1 calc GR . . . .
 H8B H 0.7830 0.6953 0.2251 0.037 Uiso 1 1 calc GR . . . .
 H8C H 0.7129 0.7152 0.2854 0.037 Uiso 1 1 calc GR . . . .
 C9 C 0.8223(3) 0.74656(11) 0.4962(3) 0.0218(8) Uani 1 1 d . . . . .
 H9A H 0.7568 0.7525 0.4661 0.033 Uiso 1 1 calc GR . . . .
 H9B H 0.8548 0.7643 0.4539 0.033 Uiso 1 1 calc GR . . . .
 H9C H 0.8439 0.7550 0.5762 0.033 Uiso 1 1 calc GR . . . .
 C10 C 0.9713(2) 0.68617(12) 0.6728(3) 0.0211(8) Uani 1 1 d . . . . .
 H10A H 0.9402 0.7061 0.7123 0.032 Uiso 1 1 calc GR . . . .
 H10B H 1.0208 0.7026 0.6560 0.032 Uiso 1 1 calc GR . . . .
 H10C H 0.9963 0.6602 0.7209 0.032 Uiso 1 1 calc GR . . . .
 C11 C 0.7250(2) 0.57239(11) 0.7520(3) 0.0155(7) Uani 1 1 d . . . . .
 H11A H 0.7443 0.5520 0.8181 0.019 Uiso 1 1 calc R . . . .
 H11B H 0.7026 0.6007 0.7760 0.019 Uiso 1 1 calc R . . . .
 C12 C 0.6498(2) 0.55038(11) 0.6567(3) 0.0164(7) Uani 1 1 d . . . . .
 H12A H 0.5930 0.5486 0.6784 0.020 Uiso 1 1 calc R . . . .
 H12B H 0.6681 0.5194 0.6441 0.020 Uiso 1 1 calc R . . . .
 C13 C 0.9127(2) 0.60030(11) 0.8212(3) 0.0155(7) Uani 1 1 d . . . . .
 C14 C 0.8962(2) 0.63403(12) 0.8923(3) 0.0212(8) Uani 1 1 d . . . . .
 H14 H 0.8374 0.6471 0.8759 0.025 Uiso 1 1 calc R . . . .
 C15 C 0.9657(3) 0.64811(12) 0.9859(3) 0.0285(9) Uani 1 1 d . . . . .
 H15 H 0.9545 0.6713 1.0326 0.034 Uiso 1 1 calc R . . . .
 C16 C 1.0512(3) 0.62870(12) 1.0121(3) 0.0259(9) Uani 1 1 d . . . . .
 H16 H 1.0985 0.6387 1.0763 0.031 Uiso 1 1 calc R . . . .
 C17 C 1.0676(2) 0.59462(12) 0.9443(3) 0.0230(8) Uani 1 1 d . . . . .
 H17 H 1.1259 0.5808 0.9632 0.028 Uiso 1 1 calc R . . . .
 C18 C 0.9989(2) 0.58062(11) 0.8487(3) 0.0164(7) Uani 1 1 d . . . . .
 H18 H 1.0108 0.5576 0.8020 0.020 Uiso 1 1 calc R . . . .
 C19 C 0.8447(2) 0.52728(10) 0.6590(3) 0.0132(7) Uani 1 1 d . . . . .
 C20 C 0.8685(2) 0.49316(11) 0.7408(3) 0.0172(7) Uani 1 1 d . . . . .
 H20 H 0.8808 0.5004 0.8186 0.021 Uiso 1 1 calc R . . . .
 C21 C 0.8741(2) 0.44916(11) 0.7086(3) 0.0205(8) Uani 1 1 d . . . . .
 H21 H 0.8905 0.4262 0.7643 0.025 Uiso 1 1 calc R . . . .
 C22 C 0.8557(2) 0.43831(12) 0.5952(3) 0.0224(8) Uani 1 1 d . . . . .
 H22 H 0.8596 0.4079 0.5737 0.027 Uiso 1 1 calc R . . . .
 C23 C 0.8317(2) 0.47151(11) 0.5127(3) 0.0177(7) Uani 1 1 d . . . . .
 H23 H 0.8192 0.4640 0.4350 0.021 Uiso 1 1 calc R . . . .
 C24 C 0.8261(2) 0.51595(11) 0.5457(3) 0.0150(7) Uani 1 1 d . . . . .
 H24 H 0.8095 0.5388 0.4898 0.018 Uiso 1 1 calc R . . . .
 C25 C 0.5198(2) 0.61012(11) 0.5127(3) 0.0129(7) Uani 1 1 d . . . . .
 C26 C 0.5157(2) 0.64062(11) 0.5969(3) 0.0174(7) Uani 1 1 d . . . . .
 H26 H 0.5698 0.6485 0.6548 0.021 Uiso 1 1 calc R . . . .
 C27 C 0.4333(2) 0.65930(12) 0.5964(3) 0.0215(8) Uani 1 1 d . . . . .
 H27 H 0.4309 0.6795 0.6547 0.026 Uiso 1 1 calc R . . . .
 C28 C 0.3541(2) 0.64860(12) 0.5109(3) 0.0229(8) Uani 1 1 d . . . . .
 H28 H 0.2975 0.6614 0.5108 0.028 Uiso 1 1 calc R . . . .
 C29 C 0.3579(2) 0.61908(12) 0.4257(3) 0.0222(8) Uani 1 1 d . . . . .
 H29 H 0.3038 0.6120 0.3669 0.027 Uiso 1 1 calc R . . . .
 C30 C 0.4406(2) 0.59974(11) 0.4260(3) 0.0169(7) Uani 1 1 d . . . . .
 H30 H 0.4429 0.5796 0.3675 0.020 Uiso 1 1 calc R . . . .
 C31 C 0.6063(2) 0.54437(11) 0.4066(3) 0.0139(7) Uani 1 1 d . . . . .
 C32 C 0.6026(2) 0.56095(11) 0.3004(3) 0.0187(7) Uani 1 1 d . . . . .
 H32 H 0.6104 0.5922 0.2909 0.022 Uiso 1 1 calc R . . . .
 C33 C 0.5876(2) 0.53222(12) 0.2081(3) 0.0216(8) Uani 1 1 d . . . . .
 H33 H 0.5845 0.5439 0.1358 0.026 Uiso 1 1 calc R . . . .
 C34 C 0.5772(2) 0.48651(12) 0.2220(3) 0.0208(8) Uani 1 1 d . . . . .
 H34 H 0.5671 0.4668 0.1591 0.025 Uiso 1 1 calc R . . . .
 C35 C 0.5813(2) 0.46952(11) 0.3266(3) 0.0212(8) Uani 1 1 d . . . . .
 H35 H 0.5745 0.4381 0.3358 0.025 Uiso 1 1 calc R . . . .
 C36 C 0.5953(2) 0.49817(11) 0.4189(3) 0.0177(7) Uani 1 1 d . . . . .
 H36 H 0.5975 0.4863 0.4907 0.021 Uiso 1 1 calc R . . . .
 C37 C 0.5737(2) 0.68848(11) 0.3776(3) 0.0181(7) Uani 1 1 d . . . . .
 C38 C 0.4861(2) 0.70441(12) 0.3080(3) 0.0202(7) Uani 1 1 d . . . . .
 C39 C 0.4285(3) 0.72719(12) 0.3575(3) 0.0249(8) Uani 1 1 d . . . . .
 H39 H 0.4485 0.7348 0.4355 0.030 Uiso 1 1 calc R . . . .
 C40 C 0.3417(3) 0.73841(13) 0.2906(4) 0.0311(9) Uani 1 1 d . . . . .
 H40 H 0.3011 0.7532 0.3233 0.037 Uiso 1 1 calc R . . . .
 C41 C 0.3136(3) 0.72824(15) 0.1762(4) 0.0379(11) Uani 1 1 d . . . . .
 H41 H 0.2540 0.7364 0.1311 0.046 Uiso 1 1 calc R . . . .
 C42 C 0.3707(3) 0.70651(17) 0.1274(4) 0.0452(12) Uani 1 1 d . . . . .
 H42 H 0.3512 0.7001 0.0487 0.054 Uiso 1 1 calc R . . . .
 C43 C 0.4576(3) 0.69390(16) 0.1940(3) 0.0378(11) Uani 1 1 d . . . . .
 H43 H 0.4971 0.6782 0.1612 0.045 Uiso 1 1 calc R . . . .
 O2 O 0.77221(17) 0.49453(9) 0.9722(2) 0.0254(6) Uani 1 1 d . . . . .
 C44 C 0.6664(3) 0.44069(17) 0.8697(4) 0.0455(12) Uani 1 1 d . . . . .
 H44A H 0.6818 0.4501 0.8020 0.068 Uiso 1 1 calc GR . . . .
 H44B H 0.6022 0.4315 0.8483 0.068 Uiso 1 1 calc GR . . . .
 H44C H 0.7051 0.4153 0.9053 0.068 Uiso 1 1 calc GR . . . .
 C45 C 0.6815(3) 0.47910(15) 0.9511(4) 0.0359(10) Uani 1 1 d . . . . .
 H45A H 0.6381 0.5037 0.9187 0.043 Uiso 1 1 calc R . . . .
 H45B H 0.6716 0.4692 1.0226 0.043 Uiso 1 1 calc R . . . .
 C46 C 0.7970(3) 0.52853(14) 1.0578(3) 0.0308(9) Uani 1 1 d . . . . .
 H46A H 0.7857 0.5177 1.1278 0.037 Uiso 1 1 calc R . . . .
 H46B H 0.7601 0.5559 1.0319 0.037 Uiso 1 1 calc R . . . .
 C47 C 0.8956(3) 0.53883(13) 1.0801(3) 0.0296(9) Uani 1 1 d . . . . .
 H47B H 0.9317 0.5117 1.1075 0.044 Uiso 1 1 calc GR . . . .
 H47A H 0.9138 0.5625 1.1374 0.044 Uiso 1 1 calc GR . . . .
 H47C H 0.9063 0.5490 1.0101 0.044 Uiso 1 1 calc GR . . . .
 Sb1 Sb 0.58633(2) 0.65766(2) 0.95056(2) 0.01905(6) Uani 1 1 d . . . . .
 F1 F 0.58905(17) 0.69185(8) 0.82434(18) 0.0394(6) Uani 1 1 d . . . . .
 F2 F 0.56905(16) 0.60463(7) 0.86409(19) 0.0338(6) Uani 1 1 d . . . . .
 F3 F 0.45985(15) 0.66481(8) 0.91162(19) 0.0361(6) Uani 1 1 d . . . . .
 F4 F 0.58402(17) 0.62449(7) 1.07863(18) 0.0351(6) Uani 1 1 d . . . . .
 F5 F 0.71258(15) 0.64970(8) 0.9895(2) 0.0403(6) Uani 1 1 d . . . . .
 F6 F 0.60258(15) 0.71079(7) 1.03578(17) 0.0262(5) Uani 1 1 d . . . . .
 Sb2 Sb 1.07749(2) 0.79994(2) 0.84761(2) 0.01865(6) Uani 1 1 d . . . . .
 F7 F 1.16828(14) 0.83426(7) 0.81385(18) 0.0291(5) Uani 1 1 d . . . . .
 F8 F 1.03289(18) 0.78467(8) 0.69502(19) 0.0426(7) Uani 1 1 d . . . . .
 F9 F 1.00262(16) 0.85113(8) 0.8203(2) 0.0488(7) Uani 1 1 d . . . . .
 F10 F 0.98535(16) 0.76671(8) 0.8800(2) 0.0388(6) Uani 1 1 d . . . . .
 F11 F 1.12381(19) 0.81778(9) 0.9991(2) 0.0506(7) Uani 1 1 d . . . . .
 F12 F 1.15308(16) 0.74931(8) 0.8763(2) 0.0392(6) Uani 1 1 d . . . . .
 N3 N 0.1999(3) 0.56762(14) 0.7632(3) 0.0430(10) Uani 1 1 d . . . . .
 C48 C 0.2343(3) 0.65330(15) 0.7749(4) 0.0443(12) Uani 1 1 d . . . . .
 H48A H 0.2138 0.6662 0.6987 0.066 Uiso 1 1 calc GR . . . .
 H48B H 0.2999 0.6582 0.8078 0.066 Uiso 1 1 calc GR . . . .
 H48C H 0.2018 0.6678 0.8224 0.066 Uiso 1 1 calc GR . . . .
 C49 C 0.2151(3) 0.60492(16) 0.7687(3) 0.0327(10) Uani 1 1 d . . . . .

loop_
  _atom_site_aniso_label
  _atom_site_aniso_U_11
  _atom_site_aniso_U_22
  _atom_site_aniso_U_33
  _atom_site_aniso_U_23
  _atom_site_aniso_U_13
  _atom_site_aniso_U_12
 Mo1 0.01085(13) 0.00801(12) 0.01189(14) -0.00060(10) 0.00318(10) -0.00019(11)
 P1 0.0118(4) 0.0113(4) 0.0118(4) -0.0001(3) 0.0029(3) 0.0023(3)
 P2 0.0115(4) 0.0106(4) 0.0128(4) 0.0021(3) 0.0031(3) 0.0006(3)
 O1 0.0396(17) 0.0204(13) 0.0238(14) -0.0082(11) 0.0095(12) 0.0045(13)
 N1 0.0187(15) 0.0120(13) 0.0167(15) -0.0011(11) 0.0052(12) 0.0017(12)
 N2 0.0161(15) 0.0114(13) 0.0186(15) 0.0040(11) 0.0068(12) 0.0013(12)
 C1 0.0135(16) 0.0135(16) 0.0192(18) 0.0015(13) 0.0093(14) -0.0034(13)
 C2 0.0174(17) 0.0138(16) 0.0172(17) -0.0021(13) 0.0100(14) -0.0033(14)
 C3 0.0131(16) 0.0134(16) 0.0180(17) 0.0021(13) 0.0076(14) -0.0030(13)
 C4 0.0159(17) 0.0099(15) 0.0216(18) -0.0001(13) 0.0080(14) -0.0041(14)
 C5 0.0146(17) 0.0136(16) 0.0167(17) 0.0007(13) 0.0056(14) -0.0048(14)
 C6 0.0168(18) 0.0173(17) 0.027(2) 0.0026(15) 0.0087(15) 0.0015(15)
 C7 0.024(2) 0.0211(19) 0.0223(19) -0.0071(15) 0.0126(16) -0.0060(16)
 C8 0.025(2) 0.028(2) 0.022(2) 0.0084(16) 0.0083(16) -0.0038(17)
 C9 0.026(2) 0.0097(16) 0.031(2) 0.0002(15) 0.0119(16) -0.0028(15)
 C10 0.0155(18) 0.0203(18) 0.026(2) -0.0041(15) 0.0037(15) -0.0054(15)
 C11 0.0148(17) 0.0208(18) 0.0106(16) 0.0030(13) 0.0033(13) 0.0043(14)
 C12 0.0155(17) 0.0161(17) 0.0179(18) 0.0057(13) 0.0054(14) 0.0004(14)
 C13 0.0197(18) 0.0120(16) 0.0138(17) 0.0013(13) 0.0037(14) 0.0006(14)
 C14 0.0197(19) 0.0200(18) 0.0178(18) 0.0002(14) -0.0031(15) 0.0095(15)
 C15 0.039(2) 0.0198(19) 0.019(2) -0.0075(15) -0.0022(17) 0.0068(18)
 C16 0.025(2) 0.0216(19) 0.022(2) -0.0024(15) -0.0070(16) -0.0002(16)
 C17 0.0182(19) 0.0237(19) 0.022(2) 0.0018(15) -0.0017(15) 0.0017(16)
 C18 0.0196(18) 0.0134(16) 0.0155(17) -0.0004(13) 0.0044(14) 0.0009(14)
 C19 0.0098(16) 0.0115(16) 0.0182(17) -0.0005(13) 0.0040(13) 0.0010(13)
 C20 0.0147(17) 0.0193(18) 0.0162(18) 0.0009(14) 0.0027(14) -0.0006(14)
 C21 0.0176(18) 0.0152(17) 0.029(2) 0.0074(15) 0.0081(15) 0.0010(15)
 C22 0.0220(19) 0.0099(16) 0.038(2) -0.0030(15) 0.0138(17) 0.0017(15)
 C23 0.0166(18) 0.0152(17) 0.0237(19) -0.0056(14) 0.0096(15) -0.0016(14)
 C24 0.0136(17) 0.0132(16) 0.0179(18) 0.0005(13) 0.0045(14) 0.0012(14)
 C25 0.0133(16) 0.0134(16) 0.0117(16) 0.0052(12) 0.0034(13) 0.0019(13)
 C26 0.0145(17) 0.0190(17) 0.0179(18) 0.0029(14) 0.0038(14) 0.0019(15)
 C27 0.0191(18) 0.0234(19) 0.0238(19) 0.0002(15) 0.0093(15) 0.0043(16)
 C28 0.0137(17) 0.0222(19) 0.034(2) 0.0033(16) 0.0093(16) 0.0050(15)
 C29 0.0120(17) 0.0244(19) 0.025(2) 0.0037(15) -0.0027(15) 0.0002(15)
 C30 0.0161(17) 0.0140(16) 0.0197(18) -0.0004(13) 0.0043(14) -0.0007(14)
 C31 0.0087(15) 0.0148(16) 0.0186(18) -0.0012(13) 0.0045(13) -0.0025(13)
 C32 0.0210(19) 0.0120(16) 0.0233(19) -0.0051(14) 0.0069(15) -0.0043(15)
 C33 0.025(2) 0.0232(19) 0.0194(19) -0.0051(15) 0.0098(16) -0.0044(16)
 C34 0.0178(18) 0.0204(18) 0.025(2) -0.0098(15) 0.0077(15) -0.0085(15)
 C35 0.0182(18) 0.0113(16) 0.036(2) -0.0024(15) 0.0107(16) -0.0028(14)
 C36 0.0169(18) 0.0143(16) 0.0239(19) 0.0027(14) 0.0094(15) -0.0003(14)
 C37 0.0239(19) 0.0132(16) 0.0191(18) 0.0019(13) 0.0094(15) -0.0038(15)
 C38 0.0163(18) 0.0204(18) 0.0224(19) 0.0066(15) 0.0036(15) 0.0024(15)
 C39 0.029(2) 0.0171(18) 0.029(2) 0.0038(15) 0.0098(17) 0.0035(16)
 C40 0.022(2) 0.028(2) 0.045(3) 0.0073(19) 0.0131(19) 0.0073(18)
 C41 0.020(2) 0.043(3) 0.045(3) 0.013(2) 0.0010(19) 0.004(2)
 C42 0.032(2) 0.071(4) 0.028(2) 0.003(2) 0.0021(19) 0.013(2)
 C43 0.032(2) 0.057(3) 0.026(2) 0.003(2) 0.0119(19) 0.014(2)
 O2 0.0226(14) 0.0329(15) 0.0200(14) -0.0026(11) 0.0054(11) 0.0058(12)
 C44 0.028(2) 0.063(3) 0.040(3) -0.016(2) 0.002(2) -0.007(2)
 C45 0.022(2) 0.051(3) 0.034(2) 0.002(2) 0.0067(18) 0.003(2)
 C46 0.039(2) 0.031(2) 0.026(2) -0.0049(17) 0.0150(19) 0.0052(19)
 C47 0.035(2) 0.026(2) 0.025(2) 0.0019(16) 0.0052(18) 0.0029(19)
 Sb1 0.01887(12) 0.01982(12) 0.01842(12) -0.00251(10) 0.00561(9) 0.00016(10)
 F1 0.0608(17) 0.0403(14) 0.0191(12) -0.0022(10) 0.0147(11) -0.0156(13)
 F2 0.0413(14) 0.0252(12) 0.0370(14) -0.0113(10) 0.0150(11) -0.0055(11)
 F3 0.0213(12) 0.0392(14) 0.0422(15) -0.0039(11) 0.0013(10) 0.0010(11)
 F4 0.0512(16) 0.0273(12) 0.0279(13) 0.0061(10) 0.0138(11) -0.0043(11)
 F5 0.0221(12) 0.0375(14) 0.0605(17) -0.0108(12) 0.0115(12) 0.0037(11)
 F6 0.0330(13) 0.0220(11) 0.0216(11) -0.0048(9) 0.0052(9) 0.0032(10)
 Sb2 0.01485(12) 0.01670(11) 0.02471(13) -0.00656(10) 0.00645(10) -0.00203(10)
 F7 0.0224(11) 0.0252(12) 0.0424(14) -0.0055(10) 0.0138(10) -0.0077(10)
 F8 0.0675(18) 0.0252(12) 0.0251(13) -0.0001(10) -0.0011(12) -0.0213(13)
 F9 0.0250(13) 0.0240(13) 0.101(2) -0.0033(13) 0.0249(14) 0.0066(11)
 F10 0.0336(14) 0.0331(13) 0.0588(17) -0.0105(12) 0.0276(12) -0.0152(11)
 F11 0.0597(18) 0.0622(18) 0.0319(14) -0.0228(13) 0.0170(13) -0.0246(15)
 F12 0.0338(14) 0.0339(13) 0.0547(16) 0.0149(12) 0.0208(12) 0.0149(11)
 N3 0.048(2) 0.047(2) 0.036(2) -0.0089(18) 0.0145(19) -0.004(2)
 C48 0.029(2) 0.049(3) 0.046(3) -0.004(2) -0.002(2) -0.001(2)
 C49 0.024(2) 0.046(3) 0.027(2) -0.0045(19) 0.0057(17) 0.000(2)

_geom_special_details
;
 All esds (except the esd in the dihedral angle between two l.s. planes)
 are estimated using the full covariance matrix.  The cell esds are taken
 into account individually in the estimation of esds in distances, angles
 and torsion angles; correlations between esds in cell parameters are only
 used when they are defined by crystal symmetry.  An approximate (isotropic)
 treatment of cell esds is used for estimating esds involving l.s. planes.
;
loop_
  _geom_bond_atom_site_label_1
  _geom_bond_atom_site_label_2
  _geom_bond_distance
  _geom_bond_site_symmetry_2
  _geom_bond_publ_flag
 Mo1 P1 2.5421(9) . ?
 Mo1 P2 2.6111(9) . ?
 Mo1 N1 1.796(3) . ?
 Mo1 N2 2.145(3) . ?
 Mo1 C1 2.420(3) . ?
 Mo1 C2 2.440(3) . ?
 Mo1 C3 2.416(3) . ?
 Mo1 C4 2.312(3) . ?
 Mo1 C5 2.322(3) . ?
 P1 C11 1.831(3) . ?
 P1 C13 1.809(3) . ?
 P1 C19 1.817(3) . ?
 P2 C12 1.856(3) . ?
 P2 C25 1.820(3) . ?
 P2 C31 1.818(3) . ?
 O1 N1 1.182(3) . ?
 N2 C37 1.141(4) . ?
 C1 C2 1.427(5) . ?
 C1 C5 1.438(4) . ?
 C1 C6 1.497(5) . ?
 C2 C3 1.418(4) . ?
 C2 C7 1.509(4) . ?
 C3 C4 1.437(4) . ?
 C3 C8 1.486(5) . ?
 C4 C5 1.425(5) . ?
 C4 C9 1.501(4) . ?
 C5 C10 1.503(5) . ?
 C6 H6A 0.9800 . ?
 C6 H6B 0.9800 . ?
 C6 H6C 0.9800 . ?
 C7 H7A 0.9800 . ?
 C7 H7B 0.9800 . ?
 C7 H7C 0.9800 . ?
 C8 H8A 0.9800 . ?
 C8 H8B 0.9800 . ?
 C8 H8C 0.9800 . ?
 C9 H9A 0.9800 . ?
 C9 H9B 0.9800 . ?
 C9 H9C 0.9800 . ?
 C10 H10A 0.9800 . ?
 C10 H10B 0.9800 . ?
 C10 H10C 0.9800 . ?
 C11 H11A 0.9900 . ?
 C11 H11B 0.9900 . ?
 C11 C12 1.529(4) . ?
 C12 H12A 0.9900 . ?
 C12 H12B 0.9900 . ?
 C13 C14 1.408(5) . ?
 C13 C18 1.395(5) . ?
 C14 H14 0.9500 . ?
 C14 C15 1.384(5) . ?
 C15 H15 0.9500 . ?
 C15 C16 1.383(5) . ?
 C16 H16 0.9500 . ?
 C16 C17 1.388(5) . ?
 C17 H17 0.9500 . ?
 C17 C18 1.392(5) . ?
 C18 H18 0.9500 . ?
 C19 C20 1.403(4) . ?
 C19 C24 1.390(4) . ?
 C20 H20 0.9500 . ?
 C20 C21 1.378(5) . ?
 C21 H21 0.9500 . ?
 C21 C22 1.387(5) . ?
 C22 H22 0.9500 . ?
 C22 C23 1.390(5) . ?
 C23 H23 0.9500 . ?
 C23 C24 1.394(4) . ?
 C24 H24 0.9500 . ?
 C25 C26 1.400(4) . ?
 C25 C30 1.394(4) . ?
 C26 H26 0.9500 . ?
 C26 C27 1.382(5) . ?
 C27 H27 0.9500 . ?
 C27 C28 1.389(5) . ?
 C28 H28 0.9500 . ?
 C28 C29 1.389(5) . ?
 C29 H29 0.9500 . ?
 C29 C30 1.397(5) . ?
 C30 H30 0.9500 . ?
 C31 C32 1.392(5) . ?
 C31 C36 1.398(4) . ?
 C32 H32 0.9500 . ?
 C32 C33 1.391(5) . ?
 C33 H33 0.9500 . ?
 C33 C34 1.386(5) . ?
 C34 H34 0.9500 . ?
 C34 C35 1.376(5) . ?
 C35 H35 0.9500 . ?
 C35 C36 1.390(5) . ?
 C36 H36 0.9500 . ?
 C37 C38 1.444(5) . ?
 C38 C39 1.397(5) . ?
 C38 C43 1.384(5) . ?
 C39 H39 0.9500 . ?
 C39 C40 1.383(5) . ?
 C40 H40 0.9500 . ?
 C40 C41 1.386(6) . ?
 C41 H41 0.9500 . ?
 C41 C42 1.372(6) . ?
 C42 H42 0.9500 . ?
 C42 C43 1.395(6) . ?
 C43 H43 0.9500 . ?
 O2 C45 1.417(5) . ?
 O2 C46 1.432(4) . ?
 C44 H44A 0.9800 . ?
 C44 H44B 0.9800 . ?
 C44 H44C 0.9800 . ?
 C44 C45 1.496(6) . ?
 C45 H45A 0.9900 . ?
 C45 H45B 0.9900 . ?
 C46 H46A 0.9900 . ?
 C46 H46B 0.9900 . ?
 C46 C47 1.490(5) . ?
 C47 H47B 0.9800 . ?
 C47 H47A 0.9800 . ?
 C47 H47C 0.9800 . ?
 Sb1 F1 1.878(2) . ?
 Sb1 F2 1.881(2) . ?
 Sb1 F3 1.871(2) . ?
 Sb1 F4 1.880(2) . ?
 Sb1 F5 1.870(2) . ?
 Sb1 F6 1.875(2) . ?
 Sb2 F7 1.878(2) . ?
 Sb2 F8 1.864(2) . ?
 Sb2 F9 1.878(2) . ?
 Sb2 F10 1.870(2) . ?
 Sb2 F11 1.874(2) . ?
 Sb2 F12 1.870(2) . ?
 N3 C49 1.132(5) . ?
 C48 H48A 0.9800 . ?
 C48 H48B 0.9800 . ?
 C48 H48C 0.9800 . ?
 C48 C49 1.466(6) . ?

loop_
  _geom_angle_atom_site_label_1
  _geom_angle_atom_site_label_2
  _geom_angle_atom_site_label_3
  _geom_angle
  _geom_angle_site_symmetry_1
  _geom_angle_site_symmetry_3
  _geom_angle_publ_flag
 P1 Mo1 P2 73.54(3) . . ?
 N1 Mo1 P1 83.70(9) . . ?
 N1 Mo1 P2 100.52(9) . . ?
 N1 Mo1 N2 88.58(12) . . ?
 N1 Mo1 C1 122.18(12) . . ?
 N1 Mo1 C2 147.40(12) . . ?
 N1 Mo1 C3 122.91(12) . . ?
 N1 Mo1 C4 90.94(12) . . ?
 N1 Mo1 C5 90.73(12) . . ?
 N2 Mo1 P1 145.99(7) . . ?
 N2 Mo1 P2 75.44(7) . . ?
 N2 Mo1 C1 129.90(10) . . ?
 N2 Mo1 C2 98.78(11) . . ?
 N2 Mo1 C3 73.67(10) . . ?
 N2 Mo1 C4 85.37(11) . . ?
 N2 Mo1 C5 121.16(11) . . ?
 C1 Mo1 P1 81.02(8) . . ?
 C1 Mo1 P2 127.00(8) . . ?
 C1 Mo1 C2 34.15(11) . . ?
 C2 Mo1 P1 105.48(8) . . ?
 C2 Mo1 P2 112.07(8) . . ?
 C3 Mo1 P1 137.09(8) . . ?
 C3 Mo1 P2 124.86(8) . . ?
 C3 Mo1 C1 56.65(11) . . ?
 C3 Mo1 C2 33.95(11) . . ?
 C4 Mo1 P1 127.69(9) . . ?
 C4 Mo1 P2 157.25(9) . . ?
 C4 Mo1 C1 58.49(11) . . ?
 C4 Mo1 C2 58.42(11) . . ?
 C4 Mo1 C3 35.29(11) . . ?
 C4 Mo1 C5 35.81(11) . . ?
 C5 Mo1 P1 92.09(8) . . ?
 C5 Mo1 P2 160.46(8) . . ?
 C5 Mo1 C1 35.21(11) . . ?
 C5 Mo1 C2 58.27(11) . . ?
 C5 Mo1 C3 58.19(11) . . ?
 C11 P1 Mo1 104.61(11) . . ?
 C13 P1 Mo1 118.50(11) . . ?
 C13 P1 C11 104.41(15) . . ?
 C13 P1 C19 107.82(15) . . ?
 C19 P1 Mo1 118.63(11) . . ?
 C19 P1 C11 100.08(15) . . ?
 C12 P2 Mo1 110.75(11) . . ?
 C25 P2 Mo1 112.95(11) . . ?
 C25 P2 C12 102.24(14) . . ?
 C31 P2 Mo1 116.13(10) . . ?
 C31 P2 C12 108.16(15) . . ?
 C31 P2 C25 105.56(15) . . ?
 O1 N1 Mo1 167.4(3) . . ?
 C37 N2 Mo1 175.0(3) . . ?
 C2 C1 Mo1 73.70(18) . . ?
 C2 C1 C5 108.2(3) . . ?
 C2 C1 C6 125.5(3) . . ?
 C5 C1 Mo1 68.66(18) . . ?
 C5 C1 C6 124.2(3) . . ?
 C6 C1 Mo1 136.2(2) . . ?
 C1 C2 Mo1 72.16(17) . . ?
 C1 C2 C7 126.5(3) . . ?
 C3 C2 Mo1 72.07(18) . . ?
 C3 C2 C1 107.5(3) . . ?
 C3 C2 C7 124.4(3) . . ?
 C7 C2 Mo1 132.7(2) . . ?
 C2 C3 Mo1 73.99(18) . . ?
 C2 C3 C4 108.9(3) . . ?
 C2 C3 C8 125.3(3) . . ?
 C4 C3 Mo1 68.43(17) . . ?
 C4 C3 C8 125.4(3) . . ?
 C8 C3 Mo1 129.3(2) . . ?
 C3 C4 Mo1 76.28(18) . . ?
 C3 C4 C9 125.8(3) . . ?
 C5 C4 Mo1 72.47(18) . . ?
 C5 C4 C3 107.3(3) . . ?
 C5 C4 C9 126.4(3) . . ?
 C9 C4 Mo1 122.9(2) . . ?
 C1 C5 Mo1 76.12(18) . . ?
 C1 C5 C10 125.2(3) . . ?
 C4 C5 Mo1 71.72(18) . . ?
 C4 C5 C1 107.9(3) . . ?
 C4 C5 C10 126.0(3) . . ?
 C10 C5 Mo1 126.7(2) . . ?
 C1 C6 H6A 109.5 . . ?
 C1 C6 H6B 109.5 . . ?
 C1 C6 H6C 109.5 . . ?
 H6A C6 H6B 109.5 . . ?
 H6A C6 H6C 109.5 . . ?
 H6B C6 H6C 109.5 . . ?
 C2 C7 H7A 109.5 . . ?
 C2 C7 H7B 109.5 . . ?
 C2 C7 H7C 109.5 . . ?
 H7A C7 H7B 109.5 . . ?
 H7A C7 H7C 109.5 . . ?
 H7B C7 H7C 109.5 . . ?
 C3 C8 H8A 109.5 . . ?
 C3 C8 H8B 109.5 . . ?
 C3 C8 H8C 109.5 . . ?
 H8A C8 H8B 109.5 . . ?
 H8A C8 H8C 109.5 . . ?
 H8B C8 H8C 109.5 . . ?
 C4 C9 H9A 109.5 . . ?
 C4 C9 H9B 109.5 . . ?
 C4 C9 H9C 109.5 . . ?
 H9A C9 H9B 109.5 . . ?
 H9A C9 H9C 109.5 . . ?
 H9B C9 H9C 109.5 . . ?
 C5 C10 H10A 109.5 . . ?
 C5 C10 H10B 109.5 . . ?
 C5 C10 H10C 109.5 . . ?
 H10A C10 H10B 109.5 . . ?
 H10A C10 H10C 109.5 . . ?
 H10B C10 H10C 109.5 . . ?
 P1 C11 H11A 110.2 . . ?
 P1 C11 H11B 110.2 . . ?
 H11A C11 H11B 108.5 . . ?
 C12 C11 P1 107.5(2) . . ?
 C12 C11 H11A 110.2 . . ?
 C12 C11 H11B 110.2 . . ?
 P2 C12 H12A 109.6 . . ?
 P2 C12 H12B 109.6 . . ?
 C11 C12 P2 110.2(2) . . ?
 C11 C12 H12A 109.6 . . ?
 C11 C12 H12B 109.6 . . ?
 H12A C12 H12B 108.1 . . ?
 C14 C13 P1 118.7(3) . . ?
 C18 C13 P1 122.3(2) . . ?
 C18 C13 C14 119.0(3) . . ?
 C13 C14 H14 120.0 . . ?
 C15 C14 C13 120.1(3) . . ?
 C15 C14 H14 120.0 . . ?
 C14 C15 H15 119.7 . . ?
 C16 C15 C14 120.6(3) . . ?
 C16 C15 H15 119.7 . . ?
 C15 C16 H16 120.1 . . ?
 C15 C16 C17 119.8(3) . . ?
 C17 C16 H16 120.1 . . ?
 C16 C17 H17 119.9 . . ?
 C16 C17 C18 120.2(3) . . ?
 C18 C17 H17 119.9 . . ?
 C13 C18 H18 119.9 . . ?
 C17 C18 C13 120.2(3) . . ?
 C17 C18 H18 119.9 . . ?
 C20 C19 P1 120.5(2) . . ?
 C24 C19 P1 119.7(2) . . ?
 C24 C19 C20 119.0(3) . . ?
 C19 C20 H20 119.9 . . ?
 C21 C20 C19 120.2(3) . . ?
 C21 C20 H20 119.9 . . ?
 C20 C21 H21 119.9 . . ?
 C20 C21 C22 120.2(3) . . ?
 C22 C21 H21 119.9 . . ?
 C21 C22 H22 119.7 . . ?
 C21 C22 C23 120.6(3) . . ?
 C23 C22 H22 119.7 . . ?
 C22 C23 H23 120.5 . . ?
 C22 C23 C24 119.0(3) . . ?
 C24 C23 H23 120.5 . . ?
 C19 C24 C23 121.0(3) . . ?
 C19 C24 H24 119.5 . . ?
 C23 C24 H24 119.5 . . ?
 C26 C25 P2 118.2(2) . . ?
 C30 C25 P2 122.3(2) . . ?
 C30 C25 C26 119.5(3) . . ?
 C25 C26 H26 119.8 . . ?
 C27 C26 C25 120.4(3) . . ?
 C27 C26 H26 119.8 . . ?
 C26 C27 H27 119.9 . . ?
 C26 C27 C28 120.2(3) . . ?
 C28 C27 H27 119.9 . . ?
 C27 C28 H28 120.1 . . ?
 C29 C28 C27 119.8(3) . . ?
 C29 C28 H28 120.1 . . ?
 C28 C29 H29 119.8 . . ?
 C28 C29 C30 120.4(3) . . ?
 C30 C29 H29 119.8 . . ?
 C25 C30 C29 119.6(3) . . ?
 C25 C30 H30 120.2 . . ?
 C29 C30 H30 120.2 . . ?
 C32 C31 P2 118.6(2) . . ?
 C32 C31 C36 118.7(3) . . ?
 C36 C31 P2 122.7(3) . . ?
 C31 C32 H32 119.6 . . ?
 C33 C32 C31 120.7(3) . . ?
 C33 C32 H32 119.7 . . ?
 C32 C33 H33 120.1 . . ?
 C34 C33 C32 119.8(3) . . ?
 C34 C33 H33 120.1 . . ?
 C33 C34 H34 119.9 . . ?
 C35 C34 C33 120.2(3) . . ?
 C35 C34 H34 119.9 . . ?
 C34 C35 H35 119.9 . . ?
 C34 C35 C36 120.2(3) . . ?
 C36 C35 H35 119.9 . . ?
 C31 C36 H36 119.8 . . ?
 C35 C36 C31 120.4(3) . . ?
 C35 C36 H36 119.8 . . ?
 N2 C37 C38 175.6(4) . . ?
 C39 C38 C37 119.9(3) . . ?
 C43 C38 C37 119.1(3) . . ?
 C43 C38 C39 120.8(3) . . ?
 C38 C39 H39 120.7 . . ?
 C40 C39 C38 118.6(4) . . ?
 C40 C39 H39 120.7 . . ?
 C39 C40 H40 119.7 . . ?
 C39 C40 C41 120.5(4) . . ?
 C41 C40 H40 119.7 . . ?
 C40 C41 H41 119.6 . . ?
 C42 C41 C40 120.8(4) . . ?
 C42 C41 H41 119.6 . . ?
 C41 C42 H42 120.2 . . ?
 C41 C42 C43 119.6(4) . . ?
 C43 C42 H42 120.2 . . ?
 C38 C43 C42 119.6(4) . . ?
 C38 C43 H43 120.2 . . ?
 C42 C43 H43 120.2 . . ?
 C45 O2 C46 113.1(3) . . ?
 H44A C44 H44B 109.5 . . ?
 H44A C44 H44C 109.5 . . ?
 H44B C44 H44C 109.5 . . ?
 C45 C44 H44A 109.5 . . ?
 C45 C44 H44B 109.5 . . ?
 C45 C44 H44C 109.5 . . ?
 O2 C45 C44 108.4(3) . . ?
 O2 C45 H45A 110.0 . . ?
 O2 C45 H45B 110.0 . . ?
 C44 C45 H45A 110.0 . . ?
 C44 C45 H45B 110.0 . . ?
 H45A C45 H45B 108.4 . . ?
 O2 C46 H46A 110.1 . . ?
 O2 C46 H46B 110.1 . . ?
 O2 C46 C47 108.1(3) . . ?
 H46A C46 H46B 108.4 . . ?
 C47 C46 H46A 110.1 . . ?
 C47 C46 H46B 110.1 . . ?
 C46 C47 H47B 109.5 . . ?
 C46 C47 H47A 109.5 . . ?
 C46 C47 H47C 109.5 . . ?
 H47B C47 H47A 109.5 . . ?
 H47B C47 H47C 109.5 . . ?
 H47A C47 H47C 109.5 . . ?
 F1 Sb1 F2 90.77(10) . . ?
 F1 Sb1 F4 178.86(10) . . ?
 F3 Sb1 F1 90.43(11) . . ?
 F3 Sb1 F2 89.52(10) . . ?
 F3 Sb1 F4 89.61(11) . . ?
 F3 Sb1 F6 90.03(10) . . ?
 F4 Sb1 F2 90.36(10) . . ?
 F5 Sb1 F1 90.01(11) . . ?
 F5 Sb1 F2 89.86(10) . . ?
 F5 Sb1 F3 179.24(11) . . ?
 F5 Sb1 F4 89.96(11) . . ?
 F5 Sb1 F6 90.59(10) . . ?
 F6 Sb1 F1 88.92(9) . . ?
 F6 Sb1 F2 179.45(10) . . ?
 F6 Sb1 F4 89.94(9) . . ?
 F7 Sb2 F9 88.66(10) . . ?
 F8 Sb2 F7 88.62(10) . . ?
 F8 Sb2 F9 89.84(12) . . ?
 F8 Sb2 F10 91.13(11) . . ?
 F8 Sb2 F11 177.47(11) . . ?
 F8 Sb2 F12 90.78(11) . . ?
 F10 Sb2 F7 178.82(10) . . ?
 F10 Sb2 F9 90.18(11) . . ?
 F10 Sb2 F11 90.96(11) . . ?
 F10 Sb2 F12 90.13(10) . . ?
 F11 Sb2 F7 89.26(10) . . ?
 F11 Sb2 F9 88.72(13) . . ?
 F12 Sb2 F7 91.03(10) . . ?
 F12 Sb2 F9 179.30(12) . . ?
 F12 Sb2 F11 90.65(12) . . ?
 H48A C48 H48B 109.5 . . ?
 H48A C48 H48C 109.5 . . ?
 H48B C48 H48C 109.5 . . ?
 C49 C48 H48A 109.5 . . ?
 C49 C48 H48B 109.5 . . ?
 C49 C48 H48C 109.5 . . ?
 N3 C49 C48 179.5(6) . . ?

loop_
  _geom_torsion_atom_site_label_1
  _geom_torsion_atom_site_label_2
  _geom_torsion_atom_site_label_3
  _geom_torsion_atom_site_label_4
  _geom_torsion
  _geom_torsion_site_symmetry_1
  _geom_torsion_site_symmetry_2
  _geom_torsion_site_symmetry_3
  _geom_torsion_site_symmetry_4
  _geom_torsion_publ_flag
 Mo1 P1 C11 C12 64.6(2) . . . . ?
 Mo1 P1 C13 C14 64.9(3) . . . . ?
 Mo1 P1 C13 C18 -115.4(3) . . . . ?
 Mo1 P1 C19 C20 -172.7(2) . . . . ?
 Mo1 P1 C19 C24 -2.4(3) . . . . ?
 Mo1 P2 C12 C11 13.7(3) . . . . ?
 Mo1 P2 C25 C26 -55.3(3) . . . . ?
 Mo1 P2 C25 C30 127.5(3) . . . . ?
 Mo1 P2 C31 C32 -44.9(3) . . . . ?
 Mo1 P2 C31 C36 133.1(2) . . . . ?
 Mo1 C1 C2 C3 63.9(2) . . . . ?
 Mo1 C1 C2 C7 -130.4(3) . . . . ?
 Mo1 C1 C5 C4 -65.2(2) . . . . ?
 Mo1 C1 C5 C10 125.3(3) . . . . ?
 Mo1 C2 C3 C4 59.8(2) . . . . ?
 Mo1 C2 C3 C8 -127.2(3) . . . . ?
 Mo1 C3 C4 C5 66.4(2) . . . . ?
 Mo1 C3 C4 C9 -120.9(3) . . . . ?
 Mo1 C4 C5 C1 68.2(2) . . . . ?
 Mo1 C4 C5 C10 -122.5(3) . . . . ?
 P1 Mo1 N1 O1 118.9(12) . . . . ?
 P1 C11 C12 P2 -49.3(3) . . . . ?
 P1 C13 C14 C15 -178.5(3) . . . . ?
 P1 C13 C18 C17 179.6(3) . . . . ?
 P1 C19 C20 C21 170.9(3) . . . . ?
 P1 C19 C24 C23 -171.0(3) . . . . ?
 P2 Mo1 N1 O1 -169.2(12) . . . . ?
 P2 C25 C26 C27 -175.3(3) . . . . ?
 P2 C25 C30 C29 175.7(3) . . . . ?
 P2 C31 C32 C33 178.6(3) . . . . ?
 P2 C31 C36 C35 -177.9(3) . . . . ?
 N2 Mo1 N1 O1 -94.3(12) . . . . ?
 C1 Mo1 N1 O1 43.7(12) . . . . ?
 C1 C2 C3 Mo1 -63.9(2) . . . . ?
 C1 C2 C3 C4 -4.1(4) . . . . ?
 C1 C2 C3 C8 168.9(3) . . . . ?
 C2 Mo1 N1 O1 9.9(13) . . . . ?
 C2 C1 C5 Mo1 63.5(2) . . . . ?
 C2 C1 C5 C4 -1.7(4) . . . . ?
 C2 C1 C5 C10 -171.2(3) . . . . ?
 C2 C3 C4 Mo1 -63.3(2) . . . . ?
 C2 C3 C4 C5 3.0(4) . . . . ?
 C2 C3 C4 C9 175.8(3) . . . . ?
 C3 Mo1 N1 O1 -24.8(13) . . . . ?
 C3 C4 C5 Mo1 -68.9(2) . . . . ?
 C3 C4 C5 C1 -0.8(4) . . . . ?
 C3 C4 C5 C10 168.5(3) . . . . ?
 C4 Mo1 N1 O1 -8.9(12) . . . . ?
 C5 Mo1 N1 O1 26.9(12) . . . . ?
 C5 C1 C2 Mo1 -60.3(2) . . . . ?
 C5 C1 C2 C3 3.6(4) . . . . ?
 C5 C1 C2 C7 169.3(3) . . . . ?
 C6 C1 C2 Mo1 135.7(3) . . . . ?
 C6 C1 C2 C3 -160.5(3) . . . . ?
 C6 C1 C2 C7 5.3(5) . . . . ?
 C6 C1 C5 Mo1 -132.2(3) . . . . ?
 C6 C1 C5 C4 162.6(3) . . . . ?
 C6 C1 C5 C10 -6.9(5) . . . . ?
 C7 C2 C3 Mo1 130.0(3) . . . . ?
 C7 C2 C3 C4 -170.2(3) . . . . ?
 C7 C2 C3 C8 2.7(5) . . . . ?
 C8 C3 C4 Mo1 123.7(3) . . . . ?
 C8 C3 C4 C5 -169.9(3) . . . . ?
 C8 C3 C4 C9 2.9(5) . . . . ?
 C9 C4 C5 Mo1 118.3(3) . . . . ?
 C9 C4 C5 C1 -173.5(3) . . . . ?
 C9 C4 C5 C10 -4.2(5) . . . . ?
 C11 P1 C13 C14 -50.9(3) . . . . ?
 C11 P1 C13 C18 128.8(3) . . . . ?
 C11 P1 C19 C20 -59.8(3) . . . . ?
 C11 P1 C19 C24 110.5(3) . . . . ?
 C12 P2 C25 C26 63.8(3) . . . . ?
 C12 P2 C25 C30 -113.5(3) . . . . ?
 C12 P2 C31 C32 -170.1(3) . . . . ?
 C12 P2 C31 C36 8.0(3) . . . . ?
 C13 P1 C11 C12 -170.2(2) . . . . ?
 C13 P1 C19 C20 49.0(3) . . . . ?
 C13 P1 C19 C24 -140.7(3) . . . . ?
 C13 C14 C15 C16 -1.3(6) . . . . ?
 C14 C13 C18 C17 -0.7(5) . . . . ?
 C14 C15 C16 C17 -0.3(6) . . . . ?
 C15 C16 C17 C18 1.4(6) . . . . ?
 C16 C17 C18 C13 -0.9(5) . . . . ?
 C18 C13 C14 C15 1.8(5) . . . . ?
 C19 P1 C11 C12 -58.7(2) . . . . ?
 C19 P1 C13 C14 -156.7(3) . . . . ?
 C19 P1 C13 C18 23.0(3) . . . . ?
 C19 C20 C21 C22 -0.3(5) . . . . ?
 C20 C19 C24 C23 -0.5(5) . . . . ?
 C20 C21 C22 C23 0.1(5) . . . . ?
 C21 C22 C23 C24 -0.1(5) . . . . ?
 C22 C23 C24 C19 0.3(5) . . . . ?
 C24 C19 C20 C21 0.6(5) . . . . ?
 C25 P2 C12 C11 -106.9(2) . . . . ?
 C25 P2 C31 C32 81.1(3) . . . . ?
 C25 P2 C31 C36 -100.9(3) . . . . ?
 C25 C26 C27 C28 -1.3(5) . . . . ?
 C26 C25 C30 C29 -1.5(5) . . . . ?
 C26 C27 C28 C29 -0.1(5) . . . . ?
 C27 C28 C29 C30 0.6(5) . . . . ?
 C28 C29 C30 C25 0.2(5) . . . . ?
 C30 C25 C26 C27 2.0(5) . . . . ?
 C31 P2 C12 C11 142.0(2) . . . . ?
 C31 P2 C25 C26 176.8(2) . . . . ?
 C31 P2 C25 C30 -0.4(3) . . . . ?
 C31 C32 C33 C34 -0.7(5) . . . . ?
 C32 C31 C36 C35 0.2(5) . . . . ?
 C32 C33 C34 C35 0.2(5) . . . . ?
 C33 C34 C35 C36 0.4(5) . . . . ?
 C34 C35 C36 C31 -0.6(5) . . . . ?
 C36 C31 C32 C33 0.5(5) . . . . ?
 C37 C38 C39 C40 -174.1(3) . . . . ?
 C37 C38 C43 C42 175.7(4) . . . . ?
 C38 C39 C40 C41 -1.6(6) . . . . ?
 C39 C38 C43 C42 0.5(6) . . . . ?
 C39 C40 C41 C42 0.6(6) . . . . ?
 C40 C41 C42 C43 1.0(7) . . . . ?
 C41 C42 C43 C38 -1.5(7) . . . . ?
 C43 C38 C39 C40 1.1(6) . . . . ?
 C45 O2 C46 C47 174.7(3) . . . . ?
 C46 O2 C45 C44 -174.3(3) . . . . ?

_shelx_res_file
;
    pl510.res created by SHELXL-2014/7

TITL pl510_a.res in P2(1)/c
REM Old TITL pl510 in P21/c #14
REM SHELXT solution in P2(1)/c
REM R1 0.087, Rweak 0.007, Alpha 0.049, Orientation as input
REM Formula found by SHELXT: C50 N2 O2 F12 P2 Mo Sb2
CELL 0.71073 15.3956 29.7446 12.4075 90 107.635 90
ZERR 4 0.0017 0.0031 0.0013 0 0.003 0
LATT 1
SYMM -X,0.5+Y,0.5-Z
SFAC C H F Mo N O P Sb
UNIT 196 228 48 4 12 8 8 8

L.S. 10
PLAN  20
TEMP -183(2)
BOND $H
LIST 6
MORE -1
CONF
fmap 2
acta 52
REM <olex2.extras>
REM <HklSrc "%.\\pl510.hkl">
REM </olex2.extras>

WGHT    0.016900    8.145400
FVAR       0.22658
MO1   4    0.759762    0.641320    0.541500    11.00000    0.01085    0.00801 =
         0.01189   -0.00060    0.00318   -0.00019
P1    7    0.820868    0.583823    0.697728    11.00000    0.01182    0.01128 =
         0.01176   -0.00009    0.00286    0.00225
P2    7    0.628710    0.583474    0.524481    11.00000    0.01148    0.01060 =
         0.01277    0.00206    0.00311    0.00055
O1    6    0.751693    0.703948    0.723649    11.00000    0.03964    0.02036 =
         0.02378   -0.00822    0.00950    0.00448
N1    5    0.748040    0.675939    0.654877    11.00000    0.01870    0.01198 =
         0.01674   -0.00112    0.00516    0.00167
N2    5    0.640656    0.673147    0.431665    11.00000    0.01611    0.01141 =
         0.01856    0.00401    0.00676    0.00129
C1    1    0.906187    0.626881    0.513638    11.00000    0.01348    0.01354 =
         0.01920    0.00146    0.00934   -0.00336
C2    1    0.840943    0.627035    0.403798    11.00000    0.01743    0.01378 =
         0.01722   -0.00211    0.00999   -0.00335
C3    1    0.803324    0.670879    0.384012    11.00000    0.01314    0.01341 =
         0.01800    0.00209    0.00763   -0.00298
C4    1    0.839929    0.697454    0.484226    11.00000    0.01587    0.00994 =
         0.02164   -0.00013    0.00798   -0.00409
C5    1    0.904358    0.670204    0.564261    11.00000    0.01457    0.01364 =
         0.01669    0.00071    0.00559   -0.00479
C6    1    0.981158    0.593238    0.555681    11.00000    0.01679    0.01729 =
         0.02734    0.00264    0.00873    0.00154
AFIX 137
H6A   2    0.996116    0.590417    0.637985    11.00000   -1.50000
H6B   2    1.035190    0.603257    0.536254    11.00000   -1.50000
H6C   2    0.961248    0.564016    0.520329    11.00000   -1.50000
AFIX   0
C7    1    0.830247    0.591730    0.313343    11.00000    0.02380    0.02111 =
         0.02227   -0.00707    0.01258   -0.00605
AFIX 137
H7A   2    0.860161    0.563895    0.347704    11.00000   -1.50000
H7B   2    0.858325    0.602397    0.256949    11.00000   -1.50000
H7C   2    0.765308    0.585972    0.276637    11.00000   -1.50000
AFIX   0
C8    1    0.744898    0.688043    0.273341    11.00000    0.02495    0.02784 =
         0.02168    0.00843    0.00827   -0.00377
AFIX 137
H8A   2    0.700295    0.664994    0.236488    11.00000   -1.50000
H8B   2    0.782965    0.695299    0.225124    11.00000   -1.50000
H8C   2    0.712891    0.715158    0.285404    11.00000   -1.50000
AFIX   0
C9    1    0.822324    0.746563    0.496159    11.00000    0.02641    0.00972 =
         0.03142    0.00019    0.01191   -0.00279
AFIX 137
H9A   2    0.756779    0.752487    0.466116    11.00000   -1.50000
H9B   2    0.854796    0.764260    0.453922    11.00000   -1.50000
H9C   2    0.843905    0.755002    0.576230    11.00000   -1.50000
AFIX   0
C10   1    0.971255    0.686167    0.672818    11.00000    0.01545    0.02025 =
         0.02597   -0.00411    0.00367   -0.00537
AFIX 137
H10A  2    0.940238    0.706083    0.712282    11.00000   -1.50000
H10B  2    1.020815    0.702592    0.656043    11.00000   -1.50000
H10C  2    0.996323    0.660232    0.720897    11.00000   -1.50000
AFIX   0
C11   1    0.724987    0.572387    0.752034    11.00000    0.01483    0.02078 =
         0.01060    0.00298    0.00330    0.00430
AFIX  23
H11A  2    0.744288    0.552017    0.818119    11.00000   -1.20000
H11B  2    0.702571    0.600730    0.775966    11.00000   -1.20000
AFIX   0
C12   1    0.649764    0.550375    0.656729    11.00000    0.01545    0.01613 =
         0.01794    0.00571    0.00538    0.00042
AFIX  23
H12A  2    0.593043    0.548644    0.678422    11.00000   -1.20000
H12B  2    0.668065    0.519390    0.644103    11.00000   -1.20000
AFIX   0
C13   1    0.912688    0.600296    0.821211    11.00000    0.01968    0.01195 =
         0.01381    0.00127    0.00365    0.00064
C14   1    0.896232    0.634034    0.892259    11.00000    0.01971    0.02003 =
         0.01784    0.00017   -0.00314    0.00948
AFIX  43
H14   2    0.837390    0.647143    0.875899    11.00000   -1.20000
AFIX   0
C15   1    0.965667    0.648108    0.985854    11.00000    0.03929    0.01979 =
         0.01895   -0.00747   -0.00224    0.00680
AFIX  43
H15   2    0.954497    0.671321    1.032558    11.00000   -1.20000
AFIX   0
C16   1    1.051164    0.628704    1.012056    11.00000    0.02512    0.02163 =
         0.02166   -0.00244   -0.00700   -0.00017
AFIX  43
H16   2    1.098539    0.638671    1.076266    11.00000   -1.20000
AFIX   0
C17   1    1.067600    0.594620    0.944294    11.00000    0.01818    0.02374 =
         0.02175    0.00185   -0.00170    0.00170
AFIX  43
H17   2    1.125920    0.580801    0.963231    11.00000   -1.20000
AFIX   0
C18   1    0.998927    0.580620    0.848694    11.00000    0.01962    0.01343 =
         0.01553   -0.00045    0.00443    0.00095
AFIX  43
H18   2    1.010820    0.557591    0.802009    11.00000   -1.20000
AFIX   0
C19   1    0.844692    0.527279    0.659046    11.00000    0.00975    0.01150 =
         0.01822   -0.00049    0.00399    0.00104
C20   1    0.868500    0.493155    0.740834    11.00000    0.01472    0.01927 =
         0.01619    0.00087    0.00267   -0.00064
AFIX  43
H20   2    0.880820    0.500392    0.818604    11.00000   -1.20000
AFIX   0
C21   1    0.874057    0.449164    0.708633    11.00000    0.01760    0.01521 =
         0.02927    0.00737    0.00807    0.00104
AFIX  43
H21   2    0.890513    0.426194    0.764332    11.00000   -1.20000
AFIX   0
C22   1    0.855711    0.438310    0.595196    11.00000    0.02198    0.00993 =
         0.03849   -0.00295    0.01377    0.00169
AFIX  43
H22   2    0.859626    0.407901    0.573721    11.00000   -1.20000
AFIX   0
C23   1    0.831659    0.471513    0.512688    11.00000    0.01661    0.01516 =
         0.02368   -0.00560    0.00956   -0.00156
AFIX  43
H23   2    0.819167    0.464042    0.435030    11.00000   -1.20000
AFIX   0
C24   1    0.826148    0.515954    0.545656    11.00000    0.01360    0.01322 =
         0.01793    0.00050    0.00450    0.00116
AFIX  43
H24   2    0.809463    0.538844    0.489766    11.00000   -1.20000
AFIX   0
C25   1    0.519823    0.610123    0.512699    11.00000    0.01331    0.01338 =
         0.01174    0.00521    0.00341    0.00191
C26   1    0.515655    0.640625    0.596901    11.00000    0.01453    0.01900 =
         0.01794    0.00286    0.00382    0.00186
AFIX  43
H26   2    0.569768    0.648546    0.654756    11.00000   -1.20000
AFIX   0
C27   1    0.433310    0.659299    0.596425    11.00000    0.01912    0.02341 =
         0.02376    0.00024    0.00928    0.00426
AFIX  43
H27   2    0.430890    0.679508    0.654735    11.00000   -1.20000
AFIX   0
C28   1    0.354095    0.648602    0.510945    11.00000    0.01375    0.02223 =
         0.03416    0.00329    0.00931    0.00497
AFIX  43
H28   2    0.297545    0.661433    0.510767    11.00000   -1.20000
AFIX   0
C29   1    0.357855    0.619083    0.425743    11.00000    0.01202    0.02438 =
         0.02470    0.00366   -0.00268    0.00020
AFIX  43
H29   2    0.303784    0.611994    0.366877    11.00000   -1.20000
AFIX   0
C30   1    0.440625    0.599741    0.426020    11.00000    0.01614    0.01397 =
         0.01972   -0.00036    0.00430   -0.00069
AFIX  43
H30   2    0.442930    0.579627    0.367473    11.00000   -1.20000
AFIX   0
C31   1    0.606284    0.544367    0.406592    11.00000    0.00871    0.01479 =
         0.01856   -0.00116    0.00455   -0.00252
C32   1    0.602605    0.560953    0.300426    11.00000    0.02098    0.01198 =
         0.02327   -0.00506    0.00692   -0.00432
AFIX  43
H32   2    0.610420    0.592228    0.290888    11.00000   -1.20000
AFIX   0
C33   1    0.587605    0.532225    0.208126    11.00000    0.02453    0.02315 =
         0.01938   -0.00510    0.00984   -0.00440
AFIX  43
H33   2    0.584531    0.543897    0.135792    11.00000   -1.20000
AFIX   0
C34   1    0.577160    0.486512    0.222026    11.00000    0.01781    0.02043 =
         0.02484   -0.00977    0.00769   -0.00845
AFIX  43
H34   2    0.567124    0.466839    0.159116    11.00000   -1.20000
AFIX   0
C35   1    0.581273    0.469515    0.326638    11.00000    0.01824    0.01127 =
         0.03566   -0.00244    0.01070   -0.00283
AFIX  43
H35   2    0.574499    0.438132    0.335833    11.00000   -1.20000
AFIX   0
C36   1    0.595317    0.498169    0.418886    11.00000    0.01693    0.01428 =
         0.02394    0.00274    0.00941   -0.00027
AFIX  43
H36   2    0.597477    0.486287    0.490724    11.00000   -1.20000
AFIX   0
C37   1    0.573697    0.688479    0.377580    11.00000    0.02392    0.01323 =
         0.01910    0.00185    0.00939   -0.00383
C38   1    0.486085    0.704411    0.307987    11.00000    0.01633    0.02041 =
         0.02236    0.00661    0.00362    0.00244
C39   1    0.428483    0.727189    0.357473    11.00000    0.02916    0.01715 =
         0.02896    0.00381    0.00983    0.00354
AFIX  43
H39   2    0.448504    0.734811    0.435483    11.00000   -1.20000
AFIX   0
C40   1    0.341725    0.738411    0.290562    11.00000    0.02201    0.02806 =
         0.04506    0.00732    0.01307    0.00727
AFIX  43
H40   2    0.301130    0.753208    0.323257    11.00000   -1.20000
AFIX   0
C41   1    0.313561    0.728240    0.176217    11.00000    0.01982    0.04272 =
         0.04540    0.01256    0.00104    0.00414
AFIX  43
H41   2    0.253987    0.736412    0.131109    11.00000   -1.20000
AFIX   0
C42   1    0.370699    0.706507    0.127379    11.00000    0.03202    0.07143 =
         0.02758    0.00290    0.00213    0.01279
AFIX  43
H42   2    0.351157    0.700082    0.048681    11.00000   -1.20000
AFIX   0
C43   1    0.457648    0.693903    0.193960    11.00000    0.03177    0.05734 =
         0.02629    0.00275    0.01191    0.01374
AFIX  43
H43   2    0.497139    0.678193    0.161232    11.00000   -1.20000
AFIX   0

O2    6    0.772209    0.494530    0.972224    11.00000    0.02255    0.03287 =
         0.02004   -0.00257    0.00540    0.00576
C44   1    0.666361    0.440694    0.869658    11.00000    0.02758    0.06324 =
         0.04026   -0.01633    0.00194   -0.00693
AFIX 137
H44A  2    0.681784    0.450051    0.801952    11.00000   -1.50000
H44B  2    0.602250    0.431524    0.848329    11.00000   -1.50000
H44C  2    0.705112    0.415345    0.905341    11.00000   -1.50000
AFIX   0

C45   1    0.681530    0.479102    0.951093    11.00000    0.02209    0.05064 =
         0.03393    0.00158    0.00670    0.00278
AFIX  23
H45A  2    0.638115    0.503688    0.918743    11.00000   -1.20000
H45B  2    0.671584    0.469159    1.022587    11.00000   -1.20000
AFIX   0

C46   1    0.797007    0.528531    1.057801    11.00000    0.03875    0.03126 =
         0.02583   -0.00489    0.01501    0.00516
AFIX  23
H46A  2    0.785736    0.517725    1.127845    11.00000   -1.20000
H46B  2    0.760098    0.555941    1.031934    11.00000   -1.20000
AFIX   0

C47   1    0.895633    0.538831    1.080111    11.00000    0.03536    0.02597 =
         0.02489    0.00194    0.00516    0.00287
AFIX 137
H47B  2    0.931688    0.511702    1.107490    11.00000   -1.50000
H47A  2    0.913803    0.562523    1.137447    11.00000   -1.50000
H47C  2    0.906257    0.549039    1.010065    11.00000   -1.50000
AFIX   0

SB1   8    0.586334    0.657664    0.950557    11.00000    0.01887    0.01982 =
         0.01842   -0.00251    0.00561    0.00016
F1    3    0.589051    0.691851    0.824336    11.00000    0.06077    0.04025 =
         0.01906   -0.00216    0.01469   -0.01563
F2    3    0.569048    0.604629    0.864089    11.00000    0.04132    0.02518 =
         0.03702   -0.01134    0.01496   -0.00551
F3    3    0.459850    0.664809    0.911623    11.00000    0.02133    0.03917 =
         0.04215   -0.00394    0.00132    0.00095
F4    3    0.584020    0.624493    1.078630    11.00000    0.05125    0.02735 =
         0.02794    0.00607    0.01382   -0.00428
F5    3    0.712578    0.649699    0.989524    11.00000    0.02211    0.03746 =
         0.06048   -0.01083    0.01145    0.00367
F6    3    0.602578    0.710785    1.035783    11.00000    0.03301    0.02205 =
         0.02157   -0.00479    0.00516    0.00323
SB2   8    1.077491    0.799939    0.847608    11.00000    0.01485    0.01670 =
         0.02471   -0.00656    0.00645   -0.00203
F7    3    1.168275    0.834256    0.813852    11.00000    0.02237    0.02516 =
         0.04241   -0.00554    0.01381   -0.00768
F8    3    1.032887    0.784671    0.695021    11.00000    0.06752    0.02521 =
         0.02505   -0.00011   -0.00111   -0.02134
F9    3    1.002619    0.851133    0.820309    11.00000    0.02500    0.02398 =
         0.10130   -0.00332    0.02486    0.00665
F10   3    0.985350    0.766714    0.880033    11.00000    0.03361    0.03312 =
         0.05880   -0.01055    0.02762   -0.01523
F11   3    1.123815    0.817776    0.999146    11.00000    0.05965    0.06224 =
         0.03191   -0.02278    0.01700   -0.02464
F12   3    1.153082    0.749308    0.876299    11.00000    0.03385    0.03391 =
         0.05465    0.01488    0.02082    0.01491
N3    5    0.199876    0.567624    0.763206    11.00000    0.04756    0.04704 =
         0.03561   -0.00887    0.01452   -0.00399
C48   1    0.234262    0.653297    0.774906    11.00000    0.02878    0.04923 =
         0.04593   -0.00443   -0.00199   -0.00053
AFIX 137
H48A  2    0.213791    0.666216    0.698703    11.00000   -1.50000
H48B  2    0.299946    0.658197    0.807817    11.00000   -1.50000
H48C  2    0.201833    0.667814    0.822354    11.00000   -1.50000
AFIX   0

C49   1    0.215139    0.604923    0.768688    11.00000    0.02407    0.04571 =
         0.02699   -0.00446    0.00572   -0.00031
HKLF 4

REM  pl510_a.res in P2(1)/c
REM R1 =  0.0393 for   10006 Fo > 4sig(Fo)  and  0.0612 for all   12898 data
REM    648 parameters refined using      0 restraints

END

WGHT      0.0168      8.3013

REM Highest difference peak  1.291,  deepest hole -0.851,  1-sigma level  0.110
Q1    1   0.5579  0.6383  0.9870  11.00000  0.05    1.29
Q2    1   0.5706  0.6003  0.5215  11.00000  0.05    0.63
Q3    1   0.6106  0.6609  0.8604  11.00000  0.05    0.53
Q4    1   0.6329  0.5637  0.4740  11.00000  0.05    0.53
Q5    1   0.4339  0.6845  0.5777  11.00000  0.05    0.51
Q6    1   0.6327  0.6685  0.8260  11.00000  0.05    0.51
Q7    1   1.0804  0.7714  0.7217  11.00000  0.05    0.51
Q8    1   0.7596  0.5782  0.7194  11.00000  0.05    0.50
Q9    1   1.1306  0.7830  0.8680  11.00000  0.05    0.49
Q10   1   0.5528  0.6991  0.1302  11.00000  0.05    0.47
Q11   1   0.6217  0.6912  0.9960  11.00000  0.05    0.46
Q12   1   0.9124  0.6493  0.5407  11.00000  0.05    0.45
Q13   1   0.8903  0.6060  0.8662  11.00000  0.05    0.45
Q14   1   0.9007  0.5156  1.0196  11.00000  0.05    0.45
Q15   1   0.6371  0.5716  0.5867  11.00000  0.05    0.44
Q16   1   0.5559  0.7440  0.7475  11.00000  0.05    0.44
Q17   1   0.3113  0.6917  0.4755  11.00000  0.05    0.44
Q18   1   1.0761  0.7803  0.8802  11.00000  0.05    0.44
Q19   1   0.7746  0.7121  0.7829  11.00000  0.05    0.44
Q20   1   0.5795  0.5833  1.0648  11.00000  0.05    0.44
;
_shelx_res_checksum               6481
_shelx_hkl_file
;
   1   0   0    0.50    2.20
   1   0   0    2.70    2.00
  -2   0   0  428.96   11.80
  -2   0   0  441.86   12.20
   2   0   0  421.66   12.00
   2   0   0  420.16   12.60
  -3   0   0  406.66   14.40
   3   0   0  456.65   14.30
   3   0   0  447.36   15.30
  -3   0   0  445.66   14.10
   3   0   0  428.26   15.00
   4   0   0 2094.09   50.19
  -4   0   0 2125.19   49.90
   4   0   0 2155.38   50.09
  -4   0   0 2156.18   49.40
   4   0   0 2155.58   49.30
   5   0   0 6684.73  146.59
   5   0   0 6828.42  146.19
   5   0   0 6784.02  145.39
  -5   0   0 6721.63  145.59
  -5   0   0 6698.33  146.09
   6   0   0 6848.41  146.29
  -6   0   0 6735.33  145.79
   6   0   0 6700.13  145.29
  -6   0   0 6599.54  145.99
   6   0   0 6489.65  146.59
   7   0   0  254.57   16.80
  -7   0   0  201.58   15.50
   7   0   0  241.48   15.60
  -8   0   0  110.59   14.70
   8   0   0  136.19   15.80
  -9   0   0   24.40   10.60
   9   0   0   42.50   11.50
 -10   0   0   29.90   11.30
  10   0   0   16.00   11.40
  11   0   0   51.19   14.20
 -11   0   0   65.69   13.70
  12   0   0 5096.49  123.99
 -12   0   0 4993.20  120.89
 -13   0   0  275.87   25.40
  13   0   0  345.47   27.60
 -14   0   0  137.59   20.20
  14   0   0  110.79   20.10
 -15   0   0   79.59   20.50
  15   0   0  115.49   21.60
  16   0   0   69.79   21.30
 -16   0   0   71.19   21.10
  17   0   0  619.64   41.70
 -17   0   0  580.44   39.60
  18   0   0  887.01   49.80
 -18   0   0  815.32   48.50
  19   0   0  103.89   26.60
 -19   0   0  116.19   27.50
   1  -1   0 2990.70   65.69
   1  -1   0 3099.29   65.69
   1   1   0 3137.89   65.09
   1   1   0 3164.38   65.69
   2  -1   0 3837.52   81.39
   2  -1   0 3825.52   80.89
   2  -1   0 3868.51   81.09
  -2  -1   0 3731.73   80.19
  -2  -1   0 3663.33   80.79
   2   1   0 3730.23   80.89
  -2   1   0 3792.82   80.89
   2   1   0 3739.63   80.19
  -2   1   0 3798.32   80.99
  -3  -1   0  865.41   23.20
   3  -1   0  866.91   24.10
   3  -1   0  919.71   23.90
  -3  -1   0  890.81   22.40
   3  -1   0  929.41   23.40
   3   1   0  888.01   23.40
   3   1   0  909.61   22.60
  -3   1   0  905.81   23.50
  -3   1   0  885.61   23.10
   4  -1   0 5469.85  117.59
   4  -1   0 5646.63  118.19
  -4  -1   0 5295.27  117.69
   4  -1   0 5322.47  118.59
  -4  -1   0 5460.35  116.99
  -4   1   0 5440.16  117.89
   4   1   0 5467.55  117.79
   4   1   0 5452.15  116.99
  -4   1   0 5427.96  117.69
   4   1   0 5375.66  117.79
  -5  -1   0  676.53   21.00
   5  -1   0  707.43   23.20
   5  -1   0  667.33   22.60
   5  -1   0  707.43   21.60
  -5  -1   0  647.04   21.80
   5   1   0  676.13   20.80
  -5   1   0  659.83   21.90
  -5   1   0  692.03   21.50
   5   1   0  699.93   22.50
   5   1   0  660.73   22.10
   6  -1   0  484.55   20.10
  -6  -1   0  454.95   19.10
  -6  -1   0  474.45   18.00
   6  -1   0  488.75   18.40
   6  -1   0  463.85   20.30
   6   1   0  484.05   19.90
   6   1   0  485.45   18.20
  -6   1   0  470.35   19.20
   6   1   0  447.96   19.40
  -7  -1   0 2768.32   66.19
  -7  -1   0 2861.71   65.89
   7  -1   0 2688.73   67.39
  -7   1   0 2689.03   66.19
   7   1   0 2785.02   65.09
   7   1   0 2674.03   66.39
  -8  -1   0 2992.30   73.39
   8  -1   0 2993.50   74.99
   8   1   0 3017.90   74.19
  -8   1   0 3176.98   73.99
  -9  -1   0   37.80   10.90
   9  -1   0   35.00   11.40
   9   1   0   22.40   11.00
  -9   1   0   11.80   10.10
  10  -1   0 1415.76   44.90
 -10  -1   0 1394.96   42.90
  10   1   0 1475.85   44.50
 -10   1   0 1389.56   43.00
 -11  -1   0   37.50   13.00
  11  -1   0   64.19   14.60
 -11   1   0   61.59   13.70
  11   1   0   65.39   13.90
  12  -1   0   70.19   16.30
 -12   1   0   43.20   14.30
  13  -1   0 1324.27   48.20
 -13  -1   0 1259.37   45.90
  13   1   0 1292.27   48.00
 -13   1   0 1329.27   46.90
  14  -1   0  164.18   26.50
 -14  -1   0  159.18   24.60
 -14   1   0  186.28   25.00
  14   1   0  140.19   21.40
 -15  -1   0   14.90   17.50
  15  -1   0   34.20   18.40
 -15   1   0   35.60   18.00
  15   1   0   33.60   18.50
 -16  -1   0 1150.08   50.09
  16  -1   0 1232.18   52.69
  16   1   0 1215.68   50.89
 -16   1   0 1204.18   51.19
  17  -1   0   21.80   20.00
 -17  -1   0   48.80   22.60
  17   1   0   59.59   21.10
 -17   1   0   27.90   20.70
 -18  -1   0   42.30   23.50
  18  -1   0   45.20   22.80
 -18   1   0   23.20   22.10
  18   1   0   47.10   22.80
  19  -1   0  191.48   30.30
  19   1   0  250.57   37.10
 -19   1   0  208.98   32.50
   0   2   0 3610.64   75.89
   1  -2   0  354.96    9.60
   1   2   0  344.07    8.40
  -2  -2   0 1882.31   41.70
   2  -2   0 2048.59   43.80
   2  -2   0 1939.21   43.20
   2  -2   0 1983.60   43.20
  -2   2   0 1851.01   42.90
   2   2   0 1883.11   41.80
   2   2   0 1890.61   42.90
  -3  -2   0  399.06   12.70
  -3  -2   0  400.96   14.30
   3  -2   0  400.96   15.50
   3  -2   0  413.26   15.10
   3  -2   0  421.36   14.90
   3   2   0  394.56   12.90
   3   2   0  397.96   14.40
  -3   2   0  395.46   14.20
  -4  -2   0  536.25   16.40
   4  -2   0  528.35   19.30
  -4  -2   0  508.05   17.90
   4  -2   0  531.15   17.90
   4  -2   0  536.75   18.80
   4   2   0  518.25   17.70
  -4   2   0  544.55   18.20
   4   2   0  522.85   16.70
   4   2   0  517.15   18.10
  -5  -2   0  313.57   13.80
   5  -2   0  318.77   16.90
  -5  -2   0  310.37   15.40
   5  -2   0  336.07   15.00
   5  -2   0  339.87   16.40
   5   2   0  312.47   15.70
   5   2   0  336.07   15.30
  -5   2   0  332.47   15.80
   5   2   0  332.57   14.20
  -6  -2   0 1472.65   38.00
   6  -2   0 1519.55   39.80
  -6  -2   0 1444.16   39.00
   6  -2   0 1531.75   39.10
   6  -2   0 1507.85   40.80
  -6   2   0 1457.75   39.30
   6   2   0 1461.25   39.00
   6   2   0 1474.45   37.70
   6   2   0 1498.95   39.40
   7  -2   0   78.89   11.60
  -7  -2   0   71.09   10.60
  -7  -2   0   94.09   12.00
   7   2   0   91.89   13.70
   7   2   0   78.39   12.40
  -7   2   0   90.99   13.50
   8  -2   0  108.89   15.60
  -8  -2   0  111.39   13.80
  -8  -2   0   72.89   11.20
  -8   2   0   70.49   10.90
   8   2   0   72.29   11.60
   9  -2   0   43.20   12.20
  -9  -2   0   20.50   10.60
  -9   2   0   34.00   11.00
   9   2   0   41.10   11.40
  10  -2   0   35.10   12.20
 -10  -2   0    7.20   10.90
  10   2   0   10.10   11.00
 -10   2   0   22.00   11.40
  11  -2   0   26.70   13.10
 -11  -2   0    5.50   12.00
 -11   2   0    6.80   11.70
  11   2   0    9.80   12.20
 -12  -2   0  804.02   34.40
  12  -2   0  755.12   35.70
 -12   2   0  766.42   33.40
  12   2   0  755.52   33.50
 -13  -2   0  224.58   24.90
  13  -2   0  242.78   26.20
 -13   2   0  217.68   24.40
  13   2   0  286.67   26.60
  14  -2   0  133.39   22.20
 -14  -2   0  122.79   19.50
  14   2   0  117.39   21.00
 -14   2   0  150.38   20.90
  15  -2   0   39.60   19.10
 -15  -2   0   35.10   17.80
  15   2   0   65.69   19.60
 -15   2   0    6.10   16.80
 -16  -2   0  -17.80   19.50
  16  -2   0   40.00   20.00
 -16   2   0   48.70   20.80
  16   2   0   80.29   20.10
  17  -2   0    1.50   19.30
 -17  -2   0  -12.70   19.90
 -17   2   0  -18.80   19.60
  17   2   0   23.80   20.60
  18  -2   0  326.57   39.60
  18   2   0  336.97   38.10
 -18   2   0  255.87   34.90
  19  -2   0  105.39   27.50
  19   2   0   49.50   23.00
 -19   2   0  100.29   28.00
   0   3   0   -8.00    2.50
   0   3   0  -13.80    2.90
  -1  -3   0 3724.23   78.49
   1  -3   0 3821.62   80.19
  -1   3   0 3748.72   79.89
   1   3   0 3670.73   78.49
   2  -3   0   38.40    6.30
  -2  -3   0   28.80    4.70
   2  -3   0   27.10    5.50
   2   3   0   25.30    3.60
  -2   3   0   33.70    5.20
   3  -3   0 2199.88   49.20
  -3  -3   0 2079.89   46.80
   3  -3   0 2134.79   48.80
  -3   3   0 2098.09   48.70
   3   3   0 2078.19   46.80
   3   3   0 2054.29   48.50
   4  -3   0   39.90    7.70
   4  -3   0   34.10    8.30
   4  -3   0   36.60    8.60
  -4  -3   0   28.50    7.50
  -4  -3   0   32.90    5.90
   4   3   0   29.00    7.30
  -4   3   0   39.00    7.70
   4   3   0   38.20    6.30
   4   3   0   34.20    7.40
   5  -3   0  205.78   13.40
   5  -3   0  199.28   14.50
   5  -3   0  209.48   14.90
  -5  -3   0  214.18   13.60
  -5  -3   0  176.38   11.20
   5   3   0  199.18   12.40
  -5   3   0  219.58   13.90
   5   3   0  194.48   13.90
   5   3   0  199.08   13.20
   6  -3   0   30.40    8.50
   6  -3   0   32.30    9.90
  -6  -3   0   30.50    8.90
   6  -3   0   30.90    9.50
  -6  -3   0   40.30    7.90
   6   3   0   26.80    9.20
   6   3   0   39.70    8.80
   6   3   0   29.20    7.80
  -6   3   0   33.10    8.70
   7  -3   0  171.58   16.30
  -7  -3   0  202.48   15.50
  -7  -3   0  191.38   13.40
   7   3   0  205.18   14.60
  -7   3   0  196.98   15.50
   7   3   0  184.98   15.20
  -8  -3   0   57.49   10.00
   8  -3   0   55.29   12.10
  -8  -3   0   52.79   10.80
   8   3   0   69.49   11.30
  -8   3   0   58.19   10.50
  -9  -3   0  134.29   16.70
   9  -3   0  120.39   17.30
   9   3   0  136.29   16.50
  -9   3   0  131.79   16.30
 -10  -3   0  682.83   28.60
  10  -3   0  669.33   30.30
  10   3   0  698.23   28.60
 -10   3   0  685.33   28.80
 -11  -3   0  143.19   19.40
  11  -3   0  147.09   20.70
 -11   3   0  149.39   19.50
  11   3   0  167.08   20.00
  12  -3   0   29.70   15.10
 -12  -3   0   22.50   14.30
 -12   3   0   15.40   12.90
  12   3   0   55.79   15.10
  13  -3   0  253.47   27.10
 -13  -3   0  227.28   25.20
 -13   3   0  245.98   24.60
  13   3   0  253.97   26.70
  14  -3   0  204.18   29.50
 -14  -3   0  178.48   26.00
 -14   3   0  230.18   26.90
  14   3   0  244.78   27.00
  15  -3   0   44.50   20.20
 -15  -3   0   39.10   18.60
 -15   3   0  102.19   20.10
  15   3   0   60.69   19.20
 -16  -3   0    4.80   21.10
  16  -3   0   51.29   21.20
  16   3   0   23.80   18.00
 -16   3   0   48.80   20.00
  17  -3   0  209.38   32.70
  17   3   0  195.28   32.60
 -17   3   0  161.08   26.40
  18  -3   0   79.79   24.70
 -18   3   0   58.89   24.00
  18   3   0   51.69   22.60
  19  -3   0   16.80   24.00
 -19   3   0   23.90   24.30
   0  -4   0 4947.41  102.59
   0   4   0 4622.54  102.59
   0   4   0 5027.50  103.69
  -1  -4   0  861.41   19.40
   1  -4   0  829.72   21.30
  -1   4   0  875.81   21.30
  -2  -4   0   18.10    3.50
   2  -4   0   31.10    6.00
   2  -4   0   33.80    6.90
  -2   4   0   26.70    5.60
   2   4   0   29.00    3.70
   3  -4   0   -1.20    6.70
   3  -4   0   -7.60    7.50
  -3  -4   0    1.00    4.50
   3   4   0    4.20    4.50
   3   4   0    4.00    6.80
  -3   4   0   -8.10    6.00
   4  -4   0 1206.68   32.00
  -4  -4   0 1178.78   28.60
   4  -4   0 1179.28   31.40
   4  -4   0 1189.98   32.80
   4   4   0 1201.78   28.90
  -4   4   0 1131.89   31.10
   4   4   0 1168.58   31.10
   4   4   0 1164.78   29.20
   5  -4   0  554.14   20.60
   5  -4   0  626.34   22.50
  -5  -4   0  577.64   18.00
   5  -4   0  600.34   22.40
   5   4   0  586.84   19.30
   5   4   0  547.15   20.90
   5   4   0  580.24   18.80
  -5   4   0  581.94   20.60
  -6  -4   0 1741.13   41.90
   6  -4   0 1671.53   45.80
   6  -4   0 1749.03   45.80
  -6  -4   0 1664.43   43.70
   6   4   0 1683.53   43.80
   6   4   0 1697.23   41.50
   6   4   0 1705.83   42.80
  -6   4   0 1670.23   43.90
   7  -4   0   38.40   10.60
  -7  -4   0   30.90    9.60
  -7  -4   0   30.90    8.00
   7   4   0   28.90    8.40
   7   4   0   23.20    9.30
  -7   4   0   34.50    9.30
  -8  -4   0  276.57   16.10
   8  -4   0  242.58   19.00
  -8  -4   0  242.98   17.50
  -8   4   0  271.17   18.00
   8   4   0  241.28   17.60
   8   4   0  232.38   15.90
  -9  -4   0  121.59   14.70
   9  -4   0  127.19   17.80
  -9  -4   0  136.39   16.40
   9   4   0   99.79   16.50
  -9   4   0  116.39   16.20
 -10  -4   0   32.50   11.70
  10  -4   0   27.20   12.00
 -10   4   0    7.00   10.80
  10   4   0   27.70   11.90
 -11  -4   0   45.00   13.30
  11  -4   0   29.70   13.60
  11   4   0   55.49   13.60
 -11   4   0   44.70   13.60
 -12  -4   0  138.19   22.70
  12  -4   0  223.88   24.50
 -12   4   0  232.08   22.20
  12   4   0  193.68   22.50
 -13  -4   0   25.50   16.30
  13  -4   0   46.00   17.20
  13   4   0   68.19   17.40
 -13   4   0   66.09   16.20
 -14  -4   0   41.60   17.00
  14  -4   0    7.90   17.90
  14   4   0   54.19   17.80
 -14   4   0   69.29   18.50
  15  -4   0  354.46   33.80
 -15   4   0  344.77   31.00
  15   4   0  349.27   30.60
  16  -4   0   36.90   20.50
  16   4   0   35.70   18.40
 -16   4   0   29.00   19.20
  17  -4   0  531.75   39.90
 -17   4   0  425.86   36.30
  17   4   0  482.35   38.10
  18  -4   0  127.49   26.30
  18   4   0   48.90   21.60
 -18   4   0   53.19   24.10
  19  -4   0   14.30   22.80
 -19   4   0   33.30   24.70
   0  -5   0    0.90    3.60
   0   5   0    1.70    4.70
   0   5   0   12.30    4.80
   1  -5   0 3756.82   80.19
  -1  -5   0 3640.94   78.39
  -1   5   0 3674.33   80.19
  -2  -5   0  586.24   15.00
   2  -5   0  651.13   19.20
   2  -5   0  594.54   20.60
  -2   5   0  602.04   18.30
   2   5   0  595.24   15.00
   3  -5   0  115.99   12.20
   3  -5   0   89.89   10.90
  -3  -5   0   92.39    7.30
   3   5   0   95.49    7.20
  -3   5   0   81.39   10.40
  -4  -5   0  314.87   11.80
   4  -5   0  312.87   16.00
   4  -5   0  350.36   16.70
   4  -5   0  308.07   17.00
   4   5   0  300.07   16.00
  -4   5   0  341.37   15.40
   4   5   0  312.27   12.40
   4   5   0  304.97   12.60
  -5  -5   0 1904.81   45.00
   5  -5   0 1959.40   48.40
   5  -5   0 2000.80   48.70
   5  -5   0 1845.12   49.40
   5   5   0 1987.20   45.60
   5   5   0 1932.51   45.00
  -5   5   0 1951.80   48.10
   5   5   0 1892.31   47.50
  -6  -5   0  152.28   11.60
   6  -5   0  162.98   16.00
   6   5   0  154.98   15.00
  -6   5   0  174.88   14.40
   6   5   0  174.48   13.60
   6   5   0  158.48   12.30
  -7  -5   0 1473.55   38.00
   7  -5   0 1443.56   42.30
  -7   5   0 1465.15   40.40
   7   5   0 1434.16   38.80
   7   5   0 1420.26   37.30
   8  -5   0  269.97   19.80
  -8  -5   0  308.67   16.50
   8   5   0  280.67   18.50
  -8   5   0  295.67   18.40
   8   5   0  301.07   16.70
   9  -5   0  223.18   20.10
  -9  -5   0  219.68   16.30
  -9  -5   0  219.98   18.30
  -9   5   0  244.58   18.50
   9   5   0  230.18   18.30
  10  -5   0 1908.61   56.69
 -10  -5   0 1949.41   54.09
  10   5   0 1945.61   53.19
 -10   5   0 1885.81   53.99
  11  -5   0  557.74   30.40
 -11  -5   0  585.84   28.40
 -11   5   0  629.44   28.80
  11   5   0  570.34   27.70
  12  -5   0  490.15   30.50
  12   5   0  456.45   28.30
 -12   5   0  464.45   28.10
  13  -5   0  514.65   33.60
 -13   5   0  616.54   31.80
  13   5   0  495.75   31.60
  14  -5   0   93.19   21.40
  14   5   0  134.49   20.40
 -14   5   0   86.99   18.50
  15  -5   0  194.28   30.20
  15   5   0  143.49   21.40
 -15   5   0  178.98   27.20
  16  -5   0  371.06   36.70
  16   5   0  382.36   33.30
 -16   5   0  389.26   34.00
  17  -5   0  170.38   26.80
 -17   5   0  199.58   32.90
  17   5   0  108.49   23.30
  18  -5   0   64.29   23.90
 -18   5   0   32.40   22.70
  19  -5   0  290.07   40.80
 -19   5   0  173.08   31.20
   0  -6   0 7143.09  149.79
   0   6   0 7293.07  151.38
   0   6   0 6864.51  149.69
   1  -6   0 1263.67   31.00
  -1   6   0 1283.07   31.40
  -2  -6   0    5.00    4.10
   2  -6   0    5.00    6.90
  -2   6   0    4.10    6.20
   2   6   0   15.10    4.30
   3  -6   0  185.08   12.80
  -3  -6   0  201.98    8.80
   3  -6   0  206.58   13.70
  -3   6   0  218.08   12.80
   3   6   0  208.28    8.90
  -4  -6   0   38.30    5.80
   4  -6   0   59.69   10.20
   4  -6   0   42.40    9.00
  -4   6   0   40.90    8.10
   4   6   0   46.90    6.00
   5  -6   0  269.37   16.60
   5  -6   0  234.68   16.30
   5  -6   0  255.07   15.50
  -5  -6   0  280.57   12.00
   5   6   0  253.97   15.50
  -5   6   0  263.77   15.20
   5   6   0  266.67   12.10
   5   6   0  255.37   12.90
   6  -6   0 6221.38  136.89
  -6  -6   0 6062.69  131.49
   6   6   0 6074.59  134.09
   6   6   0 6062.99  131.69
  -6   6   0 5997.50  134.69
   6   6   0 6007.40  131.09
   7  -6   0  217.78   17.70
  -7  -6   0  204.68   13.00
   7   6   0  203.48   15.00
   7   6   0  186.48   13.10
  -7   6   0  193.68   15.90
   8  -6   0   10.70   10.20
  -8  -6   0    0.00    7.90
   8   6   0   -1.20   10.20
  -8   6   0   -2.40    8.70
   8   6   0    4.70    8.30
   9  -6   0  113.79   15.40
  -9  -6   0  108.89   13.80
  -9   6   0  124.59   16.40
   9   6   0  103.39   15.70
  10  -6   0   30.80   12.40
  10   6   0   42.30   12.30
 -10   6   0   27.80   11.30
  11  -6   0 1128.29   42.60
 -11   6   0 1183.78   40.20
  11   6   0 1115.69   39.00
  12  -6   0 1025.70   42.50
 -12   6   0 1052.49   39.40
  12   6   0 1089.99   40.40
  13  -6   0   20.50   17.10
 -13   6   0   11.50   14.20
  13   6   0   -4.60   14.80
  14  -6   0    6.90   17.70
 -14   6   0   33.50   16.30
  14   6   0   12.70   15.50
  15  -6   0   11.20   18.70
 -15   6   0  -40.50   15.00
  15   6   0  -37.00   15.30
  16  -6   0  203.08   32.50
 -16   6   0  170.98   24.70
  16   6   0  182.38   28.90
  17  -6   0  370.76   38.40
 -17   6   0  432.46   36.80
  17   6   0  384.46   34.80
  18  -6   0  328.47   38.90
 -18   6   0  418.26   39.20
  19  -6   0    7.20   23.50
 -19   6   0    9.20   22.60
   0  -7   0   12.90    5.80
   0   7   0    4.80    6.70
   1  -7   0  125.09   10.60
  -1   7   0   88.39   10.80
  -2  -7   0 2739.63   60.49
   2  -7   0 2903.51   64.19
  -2   7   0 2756.12   63.59
  -3  -7   0  178.68    8.40
   3  -7   0  183.08   13.60
   3  -7   0  180.98   14.10
  -3   7   0  176.28   12.10
   3   7   0  191.98    9.30
  -4  -7   0  140.29    8.80
   4  -7   0  174.48   14.20
   4  -7   0  168.48   14.50
  -4   7   0  140.69   12.80
   4   7   0  138.49    9.60
   5  -7   0    3.80    8.60
   5  -7   0    7.30    8.50
  -5  -7   0   -0.20    5.60
   5   7   0    2.70    7.90
  -5   7   0    4.20    7.60
   5   7   0   15.90    5.80
  -6  -7   0  373.66   14.50
   6  -7   0  361.16   19.90
   6   7   0  369.36   15.80
  -6   7   0  388.16   18.60
   6   7   0  345.47   14.70
  -7  -7   0  501.05   18.30
   7  -7   0  485.55   23.40
   7   7   0  482.65   19.70
   7   7   0  493.85   18.50
  -7   7   0  495.95   21.50
  -8  -7   0  944.51   27.60
   8  -7   0  874.51   32.60
   8   7   0  853.61   26.80
   8   7   0  854.31   28.40
  -8   7   0  861.81   30.30
   9  -7   0    0.20   10.30
  -9  -7   0  -13.30    8.30
   9   7   0    6.60   11.00
  -9   7   0    9.60   10.30
  10  -7   0  763.92   33.70
 -10  -7   0  866.51   29.70
 -10   7   0  846.12   32.30
  10   7   0  845.42   31.00
  11  -7   0   30.90   13.90
  11   7   0   32.70   13.60
 -11   7   0    7.40   12.00
  12  -7   0    5.90   14.80
 -12   7   0   16.20   13.40
  12   7   0   -8.90   14.40
  13  -7   0  -13.90   15.40
 -13   7   0    0.20   13.90
  13   7   0  -10.90   14.60
  14  -7   0  422.36   34.40
 -14   7   0  428.36   30.80
  14   7   0  390.36   28.70
  15  -7   0   -7.40   17.80
  15   7   0   30.70   17.70
 -15   7   0   19.50   17.70
  16  -7   0   72.29   22.00
 -16   7   0   60.49   21.00
  16   7   0   70.69   20.40
  17  -7   0  163.38   27.20
 -17   7   0  119.69   25.70
  18  -7   0   62.69   24.90
 -18   7   0   42.30   23.40
 -19   7   0  229.98   35.50
   0  -8   0 1074.29   26.40
   0   8   0 1009.00   28.40
   1  -8   0  189.58   11.70
  -1   8   0  159.08   12.60
   2  -8   0  748.93   22.80
  -2  -8   0  719.53   18.80
  -2   8   0  741.33   22.70
   3  -8   0  110.69   13.10
   3  -8   0  131.09   13.00
  -3  -8   0  103.09    7.70
   3   8   0  124.89    7.90
  -3   8   0  131.89   12.20
  -4  -8   0 1167.58   27.90
   4  -8   0 1168.98   33.60
   4  -8   0 1183.28   33.00
  -4   8   0 1128.89   32.20
   4   8   0 1152.28   27.90
  -5  -8   0  229.28   11.10
   5  -8   0  273.77   17.20
   5   8   0  230.88   11.50
  -5   8   0  228.88   15.20
  -6  -8   0  256.07   12.70
   6  -8   0  278.77   18.60
  -6   8   0  281.37   16.90
   6   8   0  289.47   14.20
   6   8   0  285.37   13.20
  -7  -8   0  328.07   14.90
   7  -8   0  339.37   20.60
   7   8   0  352.46   16.60
  -7   8   0  326.47   18.90
   7   8   0  332.37   15.50
   8  -8   0  289.57   21.10
  -8  -8   0  328.97   16.30
  -8   8   0  300.27   19.00
   8   8   0  297.77   16.10
   8   8   0  307.97   17.80
   9  -8   0  457.05   25.50
  -9  -8   0  486.95   20.70
   9   8   0  463.45   21.70
  -9   8   0  400.76   22.40
   9   8   0  461.85   21.20
 -10  -8   0  168.48   16.00
  10  -8   0  157.78   20.60
  10   8   0  180.08   18.70
 -10   8   0  139.09   18.60
  11  -8   0  737.83   34.90
  11   8   0  719.83   30.90
 -11   8   0  722.23   31.80
  12  -8   0   24.70   15.00
  12   8   0  -11.40   13.80
 -12   8   0    6.00   13.30
  13  -8   0   21.00   16.90
  13   8   0    9.80   14.90
 -13   8   0    9.40   13.90
  14  -8   0  180.48   26.10
 -14   8   0  177.08   25.20
  14   8   0  108.09   19.00
  15  -8   0  389.56   35.60
  15   8   0  379.76   30.90
 -15   8   0  370.66   32.30
  16  -8   0  -23.40   18.00
  16   8   0  -17.40   17.90
 -16   8   0   19.10   18.90
  17  -8   0  163.98   27.20
 -17   8   0  187.38   28.10
  18  -8   0  120.09   26.50
 -18   8   0   74.29   24.30
   0  -9   0    4.00    5.80
   0   9   0   -4.80    6.80
   1  -9   0  596.74   19.10
  -1   9   0  599.64   20.40
   2  -9   0 1868.71   47.00
  -2  -9   0 1944.61   43.50
  -2   9   0 1980.30   47.30
   3  -9   0  746.43   24.30
   3  -9   0  732.63   27.40
  -3  -9   0  740.03   19.10
  -3   9   0  754.22   23.50
   3   9   0  705.33   19.20
   4  -9   0  320.57   17.50
   4  -9   0  336.67   17.20
  -4  -9   0  336.37   12.00
   4   9   0  343.47   12.00
  -4   9   0  323.77   16.60
  -5  -9   0 3466.55   75.99
   5  -9   0 3442.46   82.49
   5   9   0 3513.75   75.99
  -5   9   0 3423.26   80.79
   6  -9   0    9.60    9.80
  -6  -9   0   25.80    6.60
   6   9   0   11.90    6.50
  -6   9   0    5.60    8.40
   7  -9   0 1031.30   35.40
  -7  -9   0 1017.70   28.40
   7   9   0 1042.00   28.50
  -7   9   0 1061.59   33.30
   8  -9   0  808.42   32.30
  -8  -9   0  839.92   25.80
   8   9   0  822.22   26.20
  -8   9   0  798.12   29.90
   8   9   0  816.72   25.40
  -9  -9   0  568.74   22.10
   9  -9   0  584.44   28.20
   9   9   0  550.44   21.90
   9   9   0  576.64   23.10
  -9   9   0  555.74   26.10
  10  -9   0   -1.70   11.40
 -10  -9   0   -4.00    9.40
  10   9   0    0.70   12.00
 -10   9   0    8.10   11.00
  11  -9   0  373.26   27.30
 -11   9   0  435.56   25.60
  11   9   0  392.26   24.30
  12  -9   0  715.53   37.50
 -12   9   0  756.42   34.20
  12   9   0  776.92   32.50
  13  -9   0  201.98   28.50
  13   9   0  185.28   24.10
 -13   9   0  192.18   24.20
  14  -9   0   76.69   20.50
  14   9   0   57.89   17.30
 -14   9   0   73.29   17.50
  15  -9   0  285.07   32.60
  15   9   0  258.67   29.00
 -15   9   0  311.57   31.10
  16  -9   0   21.40   19.80
 -16   9   0   49.40   20.10
  17  -9   0  165.78   27.70
 -17   9   0  161.88   26.50
  18  -9   0  291.57   39.60
 -18   9   0  321.07   38.40
   0 -10   0  117.89    9.90
   0  10   0  125.09   12.20
   1 -10   0 1745.03   42.40
  -1  10   0 1757.12   44.00
   2 -10   0 1745.33   42.90
  -2 -10   0 1652.13   39.20
  -2  10   0 1714.83   43.10
   3 -10   0   12.70    8.30
  -3 -10   0   10.10    5.30
  -3  10   0   13.60    7.60
   4 -10   0  220.78   15.70
  -4 -10   0  182.18    9.70
   4  10   0  204.08   10.20
  -4  10   0  208.78   14.70
  -5 -10   0 1616.64   38.60
   5 -10   0 1766.92   46.20
   5  10   0 1635.64   38.60
  -5  10   0 1590.54   43.90
  -6 -10   0   46.30    7.30
   6 -10   0   46.00   11.00
   6  10   0   47.80    7.80
  -6  10   0   46.40   10.10
  -7 -10   0 2153.18   50.99
   7 -10   0 1989.40   57.89
  -7  10   0 2218.78   56.49
   7  10   0 2174.38   50.59
   8 -10   0  909.61   33.70
  -8 -10   0  885.71   26.50
   8  10   0  839.12   27.10
  -8  10   0  867.41   31.40
   9 -10   0  367.16   24.30
  -9 -10   0  407.86   18.60
   9  10   0  370.66   19.70
  -9  10   0  336.87   21.90
   9  10   0  378.66   18.50
 -10 -10   0   -6.40    9.50
  10 -10   0    4.60   12.20
  10  10   0    6.90   11.60
 -10  10   0    6.20   11.30
  11 -10   0 1342.27   48.40
 -11  10   0 1282.07   44.80
  11  10   0 1364.76   41.00
  12 -10   0   55.89   17.80
 -12  10   0   75.29   15.50
  12  10   0   78.09   15.40
  13 -10   0  422.06   33.60
 -13  10   0  380.96   28.50
  13  10   0  471.65   28.00
  14 -10   0  296.97   32.50
  14  10   0  297.77   27.70
 -14  10   0  319.07   28.80
  15 -10   0   84.49   22.40
 -15  10   0  101.09   21.20
  16 -10   0  110.39   25.10
 -16  10   0   85.99   21.90
  17 -10   0  699.03   47.00
 -17  10   0  735.03   43.90
  18 -10   0   39.40   25.00
 -18  10   0  -22.70   19.90
   0 -11   0   -0.70    5.90
   0  11   0   12.20    7.50
   1 -11   0  926.81   25.80
  -1 -11   0  873.81   22.70
  -1  11   0  899.81   27.40
   2 -11   0  168.58   13.30
  -2 -11   0  190.98   10.30
  -2  11   0  173.38   13.40
   3 -11   0 2043.70   50.59
  -3 -11   0 1962.60   45.10
  -3  11   0 1956.90   50.09
   4 -11   0  905.21   29.80
  -4 -11   0  930.51   23.50
  -4  11   0  922.41   28.80
   4  11   0  890.81   23.50
  -5 -11   0 1820.42   41.20
   5 -11   0 1618.94   47.80
  -5  11   0 1840.42   47.20
   5  11   0 1745.83   40.80
   6 -11   0  780.32   30.30
  -6 -11   0  860.71   23.30
  -6  11   0  815.72   28.70
   6  11   0  860.41   23.40
  -7 -11   0  756.32   22.90
   7 -11   0  802.22   30.60
   7  11   0  745.83   22.90
  -7  11   0  780.72   28.60
   8 -11   0   26.20   10.90
  -8 -11   0   -4.90    7.60
  -8  11   0   -6.40    9.10
   8  11   0   -9.90    8.20
   9 -11   0 1360.16   46.30
  -9 -11   0 1457.65   39.00
  -9  11   0 1440.46   44.60
   9  11   0 1389.96   37.90
  10 -11   0   93.99   16.30
 -10 -11   0   89.59   14.10
 -10  11   0   82.19   14.60
  10  11   0  101.29   16.50
 -11 -11   0  218.18   18.30
  11 -11   0  179.28   23.90
  11  11   0  178.78   19.80
 -11  11   0  231.68   22.10
  12 -11   0   60.19   18.00
 -12  11   0   50.79   15.00
  12  11   0   57.59   14.40
  13 -11   0   88.79   20.70
 -13  11   0  100.29   18.10
  13  11   0   86.79   17.20
  14 -11   0   34.20   19.00
  14  11   0   33.10   16.40
 -14  11   0    3.00   15.80
  15 -11   0  372.86   35.00
 -15  11   0  355.46   32.30
  16 -11   0  -10.00   19.20
 -16  11   0   12.20   18.80
  17 -11   0  548.85   43.80
 -17  11   0  528.75   39.50
  18 -11   0  234.18   38.40
 -18  11   0  273.87   34.80
   0 -12   0  239.48   12.40
   0  12   0  226.88   15.00
   1 -12   0  851.11   25.10
  -1  12   0  819.42   26.60
  -2 -12   0  289.57   12.40
   2 -12   0  311.17   16.00
  -2  12   0  289.47   16.70
  -3 -12   0  152.58    9.60
   3 -12   0  139.59   13.90
  -3  12   0  136.69   13.30
   4 -12   0   47.60   10.10
  -4 -12   0   38.80    6.30
  -4  12   0   36.20    9.20
   5 -12   0 2843.62   67.99
  -5 -12   0 2662.73   59.99
   5  12   0 2623.14   59.89
  -5  12   0 2594.54   65.99
  -6 -12   0  976.80   26.00
   6 -12   0 1022.40   33.90
  -6  12   0  980.20   32.20
   6  12   0  942.01   25.80
   7 -12   0 1770.42   52.19
  -7 -12   0 1897.71   44.40
  -7  12   0 1787.02   50.49
   7  12   0 1820.52   44.00
   8 -12   0    8.40   11.10
  -8 -12   0    2.30    7.40
   8  12   0   -2.30    7.80
  -8  12   0   12.70   10.20
  -9 -12   0  -11.10    8.30
   9 -12   0   -1.00   11.60
   9  12   0    4.20    8.60
  -9  12   0  -11.80   10.30
 -10 -12   0  103.09   14.20
  10 -12   0   75.99   15.80
  10  12   0   63.69   14.70
 -10  12   0   48.70   13.20
 -11 -12   0    2.30   10.90
  11 -12   0   -4.80   13.70
 -11  12   0  -17.30   11.40
  11  12   0   -4.90   12.30
  12 -12   0   52.49   18.90
 -12  12   0   44.90   15.20
  12  12   0   43.60   14.50
  13 -12   0  524.75   36.40
  13  12   0  543.25   28.50
 -13  12   0  552.04   32.80
  14 -12   0   41.80   19.90
 -14  12   0   34.80   17.20
  15 -12   0    8.20   19.00
 -15  12   0   26.30   17.60
  16 -12   0  -12.10   19.50
 -16  12   0  -11.80   17.80
  17 -12   0  189.68   30.70
 -17  12   0  195.88   32.50
  18 -12   0   32.30   22.80
 -18  12   0   36.80   21.80
   0 -13   0   -1.10    6.50
   0  13   0    2.50    7.60
  -1 -13   0   83.79    9.00
   1 -13   0   79.19   11.40
  -1  13   0   70.69   10.30
  -2 -13   0  229.78   11.90
   2 -13   0  278.47   15.80
  -2  13   0  253.57   16.20
   3 -13   0 1677.03   44.20
  -3 -13   0 1596.84   39.00
  -3  13   0 1675.33   44.30
   4 -13   0  497.65   22.30
  -4 -13   0  533.15   16.60
  -4  13   0  545.25   22.40
  -5 -13   0  148.39    9.80
   5 -13   0  175.28   16.50
  -5  13   0  149.29   15.50
  -6 -13   0  354.16   13.80
   6 -13   0  340.57   21.00
  -6  13   0  358.86   20.10
   6  13   0  335.97   14.20
   7 -13   0  378.66   23.20
  -7 -13   0  412.56   16.00
  -7  13   0  397.26   21.90
   7  13   0  425.76   17.40
  -8 -13   0   -1.10    7.40
   8 -13   0   -1.10   10.60
   8  13   0   15.00    8.00
  -8  13   0    2.20    9.90
  -9 -13   0  721.43   24.60
   9 -13   0  744.83   33.40
  -9  13   0  726.53   30.70
   9  13   0  746.73   24.40
  10 -13   0  579.84   31.20
 -10 -13   0  579.94   23.20
  10  13   0  545.15   22.20
 -10  13   0  543.05   28.60
 -11 -13   0   14.00   11.10
  11 -13   0    0.30   14.00
 -11  13   0    7.00   12.90
  12 -13   0  265.37   29.10
 -12  13   0  218.68   24.10
  13 -13   0   26.80   18.00
 -13  13   0   -2.00   14.80
  14 -13   0   47.90   19.00
 -14  13   0   56.59   18.20
  15 -13   0  259.77   35.10
 -15  13   0  292.87   30.60
  16 -13   0  132.59   26.50
 -16  13   0  154.18   24.70
  17 -13   0  163.18   29.20
 -17  13   0  206.38   34.00
  18 -13   0   42.90   24.80
 -18  13   0   38.80   22.50
   0 -14   0 1563.64   38.90
   0  14   0 1577.54   42.60
  -1 -14   0   50.99    7.00
   1 -14   0   63.59    9.00
   1  14   0   51.69    9.70
  -1  14   0   48.00    9.60
  -2 -14   0  156.98   11.20
   2 -14   0  146.69   14.20
  -2  14   0  157.78   14.30
  -3 -14   0  466.95   16.20
   3 -14   0  510.05   21.30
  -3  14   0  473.85   21.20
   4 -14   0  875.11   30.40
  -4 -14   0  906.51   24.30
  -4  14   0  931.61   30.60
  -5 -14   0  111.69    9.70
   5 -14   0  103.59   15.60
  -5  14   0  113.99   14.30
  -6 -14   0 1010.70   26.50
   6 -14   0 1105.59   36.00
  -6  14   0  962.30   33.20
   6  14   0  936.41   26.80
  -7 -14   0  218.38   12.60
   7 -14   0  238.28   20.30
  -7  14   0  183.48   18.30
   7  14   0  229.28   13.30
  -8 -14   0  497.95   18.90
   8 -14   0  486.95   27.10
   8  14   0  535.45   19.00
  -8  14   0  498.75   25.40
  -9 -14   0  -17.60    8.00
   9 -14   0   -6.50   11.20
   9  14   0   12.80    8.40
  -9  14   0  -16.90   10.20
 -10 -14   0   20.80   10.00
  10 -14   0    7.50   14.00
 -10  14   0    8.20   12.00
  11 -14   0  171.38   25.20
 -11 -14   0  151.78   17.00
 -11  14   0  161.98   21.80
  12 -14   0  223.58   28.20
 -12  14   0  213.28   24.30
  13 -14   0  275.97   30.70
 -13  14   0  227.18   26.40
  14 -14   0   23.50   18.10
 -14  14   0   -4.40   15.80
  15 -14   0   70.59   21.70
 -15  14   0   37.40   19.10
  16 -14   0   60.29   22.40
 -16  14   0   28.00   19.80
  17 -14   0  228.78   31.00
 -17  14   0  200.08   29.10
  18 -14   0   23.60   23.90
 -18  14   0   78.89   25.20
   0 -15   0   -2.80    6.70
   0  15   0    5.60    8.10
  -1 -15   0 1005.10   26.60
   1 -15   0 1006.10   29.40
  -1  15   0 1017.20   32.30
   1  15   0 1018.50   31.80
  -2 -15   0    5.60    6.70
   2 -15   0    4.00    8.10
  -2  15   0   13.40    8.90
  -3 -15   0   39.40    7.30
   3 -15   0   51.89   10.20
  -3  15   0   29.60    9.40
   4 -15   0  377.26   20.50
  -4 -15   0  395.86   14.80
  -4  15   0  378.06   20.20
   5 -15   0   11.00    9.40
  -5 -15   0   -0.90    6.30
  -5  15   0    3.70    8.90
  -6 -15   0   79.69    9.60
   6 -15   0   92.89   14.00
  -6  15   0  105.49   15.60
  -7 -15   0  245.28   13.10
   7 -15   0  216.88   20.50
   7  15   0  208.38   13.10
  -7  15   0  227.38   18.70
  -8 -15   0  225.48   13.70
   8 -15   0  226.68   22.00
  -8  15   0  209.38   19.40
   8  15   0  238.98   14.10
   9 -15   0   23.10   13.60
  -9 -15   0   -5.00    8.40
   9  15   0   18.50    8.80
  -9  15   0   -3.60   11.10
  10 -15   0   -1.10   13.50
 -10 -15   0    1.80    9.60
 -10  15   0   19.10   12.70
 -11 -15   0   27.70   11.30
  11 -15   0   39.00   17.50
 -11  15   0   54.39   15.40
  12 -15   0   75.39   20.20
 -12  15   0   31.90   15.30
  13 -15   0   88.69   21.10
 -13  15   0   95.89   18.50
  14 -15   0  -21.70   16.70
 -14  15   0    4.10   15.60
  15 -15   0    7.80   19.10
 -15  15   0  -18.10   16.60
  16 -15   0  256.57   35.70
 -16  15   0  200.58   31.20
  17 -15   0  -18.10   18.30
 -17  15   0   21.70   21.40
   0 -16   0  951.20   27.40
   0  16   0  976.40   31.40
  -1 -16   0 1025.20   27.00
   1 -16   0  958.00   29.30
  -1  16   0 1012.90   32.90
   1  16   0  995.60   32.30
   2 -16   0  290.37   16.90
  -2 -16   0  277.17   13.90
  -2  16   0  252.57   17.80
  -3 -16   0  136.79   11.30
   3 -16   0  130.09   15.20
  -3  16   0  153.58   15.80
   4 -16   0   14.10    9.90
  -4 -16   0    0.90    6.80
  -4  16   0    6.40    9.10
   5 -16   0 1589.74   47.50
  -5 -16   0 1660.83   39.70
  -5  16   0 1646.64   47.10
   6 -16   0  109.49   17.50
  -6 -16   0   81.59   10.00
  -6  16   0  121.39   16.30
   7 -16   0  632.74   29.70
  -7  16   0  616.34   27.80
   8 -16   0  144.99   20.80
  -8  16   0  136.09   18.80
   8  16   0  155.28   13.00
   9 -16   0   34.40   15.10
  -9 -16   0    6.10    8.80
  -9  16   0   28.40   12.40
  10 -16   0  228.28   26.60
 -10 -16   0  309.87   17.30
 -10  16   0  297.67   24.50
  11 -16   0   79.19   19.30
 -11 -16   0   45.90   11.50
 -11  16   0   68.79   15.90
  12 -16   0  176.28   24.50
 -12  16   0  138.59   20.00
  13 -16   0  101.09   21.50
 -13  16   0  157.48   25.30
  14 -16   0    8.10   17.80
 -14  16   0   -2.50   15.70
  15 -16   0   89.39   23.30
 -15  16   0   57.89   19.80
  16 -16   0   24.10   21.20
 -16  16   0    8.10   19.00
  17 -16   0  225.48   35.70
 -17  16   0  170.58   28.20
   0 -17   0    2.50    7.10
   0  17   0   12.40    9.20
   1 -17   0   36.50    8.70
  -1 -17   0   21.60    7.20
  -1  17   0    9.00    9.50
   1  17   0   24.30    9.70
  -2 -17   0  195.78   12.70
   2 -17   0  175.48   15.30
  -2  17   0  168.58   16.60
   3 -17   0 2928.01   72.69
  -3 -17   0 2889.01   67.59
  -3  17   0 3047.60   74.49
   4 -17   0  103.19   16.10
  -4 -17   0  123.89   11.20
  -4  17   0  117.69   15.50
  -5 -17   0   17.10    7.30
   5 -17   0   16.60   10.80
  -5  17   0   12.00   10.00
  -6 -17   0   -0.20    6.80
   6 -17   0   -0.60   11.10
  -6  17   0    2.30   10.00
   7 -17   0  188.68   21.10
  -7  17   0  177.08   19.00
   8 -17   0   80.09   16.10
  -8  17   0   66.69   14.20
  -9 -17   0 1390.06   36.60
   9 -17   0 1236.78   48.20
  -9  17   0 1363.76   45.80
 -10 -17   0   -2.90    9.20
  10 -17   0   15.60   15.60
 -10  17   0  -15.60   12.10
 -11 -17   0   -6.70   14.10
  11 -17   0   -5.30   14.50
 -11  17   0    7.60   14.10
  12 -17   0   82.09   19.70
 -12  17   0   87.89   18.40
  13 -17   0   -2.80   16.00
 -13  17   0   10.30   15.50
  14 -17   0  376.86   35.40
 -14  17   0  354.56   31.70
  15 -17   0  809.62   47.40
 -15  17   0  704.43   41.50
  16 -17   0  149.79   27.20
 -16  17   0  117.79   24.80
  17 -17   0   16.20   21.40
 -17  17   0    7.50   21.20
   0 -18   0 1966.10   48.10
   0  18   0 1893.21   52.59
  -1 -18   0 1831.02   43.70
   1 -18   0 1741.83   46.20
   1  18   0 1814.42   49.80
  -1  18   0 1714.33   49.70
  -2 -18   0  423.26   17.80
   2 -18   0  447.96   20.50
  -2  18   0  426.46   22.40
   3 -18   0   89.89   15.10
  -3 -18   0   86.59   11.20
  -3  18   0   97.19   15.80
   4 -18   0  233.78   18.90
  -4 -18   0  246.88   13.70
  -4  18   0  247.48   18.70
  -5 -18   0   95.09   10.90
   5 -18   0  103.59   17.50
  -5  18   0   86.59   13.70
   6 -18   0  117.49   19.30
  -6  18   0  145.99   17.80
   7 -18   0  866.91   35.80
  -7  18   0  821.82   33.80
   8 -18   0   79.99   16.40
  -8  18   0   23.70   12.80
   9 -18   0  153.88   24.30
  -9  18   0  126.99   20.40
  10 -18   0  335.97   29.00
 -10 -18   0  280.97   16.80
 -10  18   0  284.97   25.10
  11 -18   0  389.96   31.20
 -11  18   0  378.36   28.40
  12 -18   0  481.55   35.10
 -12  18   0  552.24   33.00
  13 -18   0  812.52   44.40
 -13  18   0  827.32   41.10
  14 -18   0  -25.50   16.30
 -14  18   0    9.80   17.10
  15 -18   0  200.18   32.80
 -15  18   0  177.08   29.20
  16 -18   0  326.57   38.10
 -16  18   0  271.47   33.20
  17 -18   0   13.90   22.00
 -17  18   0    1.00   20.50
   0 -19   0   13.10    7.90
   0  19   0    3.20    9.80
   1 -19   0  670.93   24.50
  -1 -19   0  681.23   22.20
  -1  19   0  702.13   28.40
   1  19   0  685.33   27.90
   2 -19   0  394.46   19.70
  -2 -19   0  375.16   17.40
  -2  19   0  368.56   21.80
   2  19   0  339.37   21.30
  -3 -19   0 1432.56   37.20
   3 -19   0 1393.76   41.90
  -3  19   0 1451.25   44.30
  -4 -19   0 1297.27   34.20
   4 -19   0 1284.87   40.70
  -4  19   0 1279.07   41.60
  -5 -19   0   10.30    8.00
   5 -19   0    1.10   10.80
  -5  19   0    1.20   10.60
   6 -19   0   43.40   13.50
  -6  19   0   15.40   11.30
   7 -19   0   36.90   14.10
  -7  19   0   22.40   12.10
   8 -19   0  217.78   24.30
  -8  19   0  204.98   21.40
   9 -19   0  778.62   37.70
  -9  19   0  790.02   35.10
  10 -19   0  728.53   38.50
 -10  19   0  824.72   36.90
  11 -19   0   13.60   15.80
 -11  19   0   16.40   15.10
  12 -19   0   17.20   16.60
 -12  19   0   -3.40   14.20
  13 -19   0  136.99   23.00
 -13  19   0  125.49   21.70
  14 -19   0   28.40   18.90
 -14  19   0   35.40   17.60
  15 -19   0  511.75   41.20
 -15  19   0  471.75   35.80
  16 -19   0  619.94   45.60
 -16  19   0  624.04   42.30
   0 -20   0 2920.51   68.69
   0  20   0 2865.41   74.29
  -1 -20   0   58.79    9.00
   1 -20   0   50.79   10.00
   1  20   0   67.59   12.70
  -1  20   0   82.49   13.50
   2 -20   0  341.07   19.20
  -2 -20   0  307.97   16.60
  -2  20   0  305.77   20.80
   2  20   0  313.77   21.10
   3 -20   0   21.10   10.30
  -3 -20   0    3.70    8.30
  -3  20   0   11.30   10.50
  -4 -20   0    0.50    8.10
   4 -20   0   14.70   10.80
  -4  20   0    9.50   10.70
   5 -20   0   48.50   13.00
  -5 -20   0   49.50    9.10
  -5  20   0   19.50   12.10
   6 -20   0 1901.21   58.29
  -6  20   0 2066.99   58.99
   7 -20   0   99.49   16.80
  -7  20   0  108.09   16.10
   8 -20   0   58.19   15.80
  -8  20   0   16.70   13.00
   9 -20   0  -12.10   13.40
  -9  20   0    3.30   13.10
  10 -20   0   22.20   15.50
 -10  20   0   16.50   14.00
  11 -20   0  128.29   21.30
 -11  20   0   80.99   17.90
  12 -20   0  786.02   42.30
 -12  20   0  761.82   40.00
  13 -20   0  351.46   34.90
 -13  20   0  382.16   32.20
  14 -20   0  278.57   34.00
 -14  20   0  259.17   30.90
  15 -20   0   65.19   23.20
 -15  20   0   50.99   20.90
  16 -20   0   28.10   21.30
 -16  20   0   45.80   21.60
   0 -21   0   17.40    9.00
   0  21   0   36.60   11.90
   1 -21   0  543.35   22.70
  -1 -21   0  576.04   20.30
  -1  21   0  530.55   26.70
   1  21   0  530.05   26.20
  -2 -21   0 1825.22   46.80
   2 -21   0 1842.42   49.70
   2  21   0 1816.92   52.69
  -2  21   0 1714.13   52.49
  -3 -21   0    2.30    8.70
   3 -21   0   15.70   10.60
  -3  21   0   21.80   11.50
   4 -21   0  731.33   30.10
  -4 -21   0  750.92   24.30
  -4  21   0  720.43   31.50
   5 -21   0   18.10   12.60
  -5 -21   0   16.30    8.80
  -5  21   0    4.40   11.70
   6 -21   0  190.98   21.50
  -6  21   0  147.59   20.30
   7 -21   0   10.60   13.30
  -7  21   0   10.80   12.50
   8 -21   0 1340.57   47.80
  -8  21   0 1226.28   45.70
   9 -21   0  144.19   21.10
  -9  21   0  138.49   21.60
  10 -21   0  877.51   42.90
 -10  21   0  914.71   40.30
  11 -21   0   82.49   19.80
 -11  21   0   63.59   17.60
  12 -21   0   29.20   18.60
 -12  21   0   -3.10   15.50
  13 -21   0   41.90   20.20
 -13  21   0   65.09   19.10
  14 -21   0  686.13   44.10
 -14  21   0  756.02   42.10
  15 -21   0   -1.00   19.00
 -15  21   0    8.10   18.80
  16 -21   0  280.77   38.00
 -16  21   0  202.78   32.90
   0 -22   0  561.54   22.10
   0  22   0  552.94   27.30
   1 -22   0  124.89   15.40
  -1 -22   0  125.89   13.00
  -1  22   0  141.49   19.20
   1  22   0  146.89   18.60
   2 -22   0  888.11   30.80
  -2 -22   0  871.21   28.00
   2  22   0  812.22   33.40
  -2  22   0  824.72   33.50
   3 -22   0   16.90   11.50
  -3 -22   0   16.10    9.50
  -3  22   0   32.60   12.50
   3  22   0   34.80   13.00
  -4 -22   0  720.73   24.60
   4 -22   0  690.33   30.40
  -4  22   0  779.82   32.90
   5 -22   0   14.00   12.30
  -5 -22   0  -15.00    8.60
  -5  22   0   -3.60   11.50
   6 -22   0  291.17   24.30
  -6  22   0  301.87   23.50
   7 -22   0   97.59   17.60
  -7  22   0  107.09   16.90
   8 -22   0 1171.78   45.40
  -8  22   0 1108.49   43.70
   9 -22   0  366.56   29.80
  -9  22   0  402.86   29.00
  10 -22   0  333.47   30.90
 -10  22   0  330.77   28.30
  11 -22   0    4.20   16.60
 -11  22   0    9.30   15.20
  12 -22   0  380.76   34.70
 -12  22   0  422.46   32.70
  13 -22   0  -34.30   15.90
 -13  22   0   24.20   17.60
  14 -22   0  513.65   42.50
 -14  22   0  484.25   36.50
  15 -22   0  326.07   36.90
 -15  22   0  291.67   34.00
   0 -23   0  -10.60    8.70
   0  23   0  -10.90   11.70
   1 -23   0  127.99   15.50
  -1 -23   0  104.19   13.00
  -1  23   0  122.39   19.40
   1  23   0  105.39   15.70
  -2 -23   0  670.23   25.10
   2 -23   0  699.63   27.80
  -2  23   0  651.73   31.00
   2  23   0  732.43   31.40
  -3 -23   0  348.47   18.50
   3 -23   0  375.76   22.60
   3  23   0  370.36   24.70
  -3  23   0  350.86   24.90
  -4 -23   0  432.06   19.90
   4 -23   0  502.65   26.60
  -4  23   0  473.75   28.00
  -5 -23   0  576.14   21.90
   5 -23   0  576.34   29.40
  -5  23   0  595.54   30.20
   6 -23   0   68.09   15.50
  -6  23   0   38.70   14.00
   7 -23   0    9.40   13.70
  -7  23   0    9.60   13.80
   8 -23   0  662.13   35.60
  -8  23   0  627.74   34.60
   9 -23   0  488.85   32.70
  -9  23   0  426.36   30.30
  10 -23   0  158.48   23.70
 -10  23   0  156.08   21.80
  11 -23   0  237.08   30.60
 -11  23   0  194.88   27.00
  12 -23   0   18.90   18.40
 -12  23   0  105.39   21.50
  13 -23   0  120.29   24.50
 -13  23   0   87.49   21.70
  14 -23   0  613.44   44.30
 -14  23   0  579.54   40.30
  15 -23   0   30.00   21.60
 -15  23   0   -1.50   18.10
   0 -24   0   74.49   11.50
   0  24   0   76.79   15.80
   1 -24   0    0.20   10.00
  -1 -24   0   -9.30    8.40
  -1  24   0   -4.50   11.80
   1  24   0  -10.70   12.10
   2 -24   0  151.68   17.60
  -2 -24   0  125.79   14.80
  -2  24   0  126.39   20.90
   2  24   0  135.79   20.50
  -3 -24   0   24.50   10.30
   3 -24   0   15.10   11.90
   3  24   0   17.50   13.40
  -3  24   0   51.49   14.50
   4 -24   0 1195.08   41.40
  -4 -24   0 1175.78   34.60
  -4  24   0 1197.98   44.00
   5 -24   0   28.50   14.30
  -5  24   0   27.30   13.90
   6 -24   0   44.10   15.30
  -6  24   0   48.60   15.40
   7 -24   0   75.79   17.60
  -7  24   0  100.69   18.00
   8 -24   0  121.19   20.10
  -8  24   0   99.79   18.30
   9 -24   0  414.36   32.30
  -9  24   0  459.45   31.50
  10 -24   0  169.58   27.60
 -10  24   0  207.78   26.10
  11 -24   0  357.76   33.80
 -11  24   0  325.17   30.40
  12 -24   0   -7.20   17.00
 -12  24   0   16.60   16.90
  13 -24   0    8.80   19.40
 -13  24   0  -23.80   15.80
  14 -24   0   35.00   21.70
 -14  24   0   -2.00   17.10
  15 -24   0   43.90   22.70
 -15  24   0   15.20   18.70
   0 -25   0   -8.80    9.60
   0  25   0  -18.10   12.20
  -1 -25   0   21.10    9.20
   1 -25   0    3.20   10.50
   1  25   0   10.50   12.70
  -1  25   0    9.90   12.90
   2 -25   0  -11.20   10.60
  -2 -25   0   11.30   10.60
   2  25   0   12.10   12.80
  -2  25   0   -7.20   12.40
   3 -25   0   27.90   12.20
  -3 -25   0   32.60   10.90
  -3  25   0   16.60   14.30
   3  25   0  -10.90   13.20
  -4 -25   0   10.40   10.20
   4 -25   0   19.90   13.30
   4  25   0   28.30   13.90
  -4  25   0    7.30   13.00
   5 -25   0  375.26   27.00
  -5 -25   0  379.76   19.00
  -5  25   0  448.06   28.40
   6 -25   0   85.69   17.50
  -6  25   0   89.49   17.10
   7 -25   0   22.20   15.70
  -7  25   0   22.30   15.10
   8 -25   0  154.38   21.70
  -8  25   0  152.08   24.40
   9 -25   0    9.50   16.60
  -9  25   0    5.10   15.70
  10 -25   0  181.48   28.50
 -10  25   0  169.58   26.00
  11 -25   0  -10.20   16.70
 -11  25   0    6.60   16.60
  12 -25   0   72.69   22.70
 -12  25   0   81.49   21.10
  13 -25   0   -1.90   18.80
 -13  25   0    0.50   17.60
  14 -25   0   34.30   21.60
 -14  25   0   61.39   21.20
   0 -26   0  167.98   16.50
   0  26   0  179.08   22.30
   1 -26   0  259.37   19.30
  -1 -26   0  259.37   16.70
   1  26   0  301.37   24.60
  -1  26   0  263.77   24.30
  -2 -26   0  398.26   21.00
   2 -26   0  417.16   23.60
  -2  26   0  361.56   27.30
   2  26   0  363.76   26.40
  -3 -26   0  140.49   16.20
   3 -26   0  133.69   19.30
  -3  26   0  140.69   22.60
   3  26   0  178.38   23.10
  -4 -26   0  133.19   15.80
   4 -26   0  151.68   21.10
   4  26   0  105.19   18.40
  -4  26   0  171.58   23.10
   5 -26   0  212.48   23.50
  -5 -26   0  181.38   22.00
  -5  26   0  148.69   23.30
   6 -26   0  182.88   24.80
  -6  26   0  178.48   24.10
   7 -26   0  185.58   25.50
  -7  26   0  181.58   25.20
   8 -26   0  191.08   26.50
  -8  26   0  133.79   20.60
   9 -26   0   31.80   17.70
  -9  26   0   15.40   16.50
  10 -26   0  221.08   30.50
 -10  26   0  253.27   28.60
  11 -26   0   20.20   19.20
 -11  26   0   21.60   17.70
  12 -26   0   19.60   18.80
 -12  26   0   18.90   17.90
  13 -26   0   50.19   22.50
 -13  26   0   36.00   20.20
  14 -26   0  173.38   28.60
 -14  26   0  217.28   32.60
   0 -27   0   -5.50   10.10
   0  27   0   -1.80   13.80
   1 -27   0   55.29   12.70
  -1 -27   0   27.40   12.70
  -1 -27   0   48.60   10.30
  -1  27   0   96.19   17.70
   1  27   0   52.39   16.10
   2 -27   0  532.85   26.80
  -2 -27   0  533.05   24.40
  -2  27   0  521.45   31.60
   2  27   0  572.04   31.20
  -3 -27   0  534.05   23.80
   3 -27   0  560.34   28.40
  -3  27   0  513.35   31.50
   3  27   0  610.44   32.30
  -4 -27   0  569.14   24.30
   4 -27   0  622.44   30.60
  -4  27   0  609.44   33.80
   4  27   0  583.24   32.70
   5 -27   0  535.15   31.10
   5  27   0  522.45   31.80
  -5  27   0  568.14   33.00
   6 -27   0   -3.40   14.40
  -6  27   0    0.50   14.20
   7 -27   0  165.38   25.50
  -7  27   0  165.68   25.30
   8 -27   0 1273.87   51.49
  -8  27   0 1332.97   51.29
   9 -27   0  185.08   29.20
  -9  27   0  256.57   28.50
  10 -27   0   16.80   18.40
 -10  27   0   37.10   17.80
  11 -27   0  159.88   25.50
 -11  27   0  186.88   25.50
  12 -27   0  175.28   28.00
 -12  27   0  159.68   25.10
  13 -27   0  -14.20   19.70
 -13  27   0    7.50   18.60
   0 -28   0  347.97   20.60
   0  28   0  373.86   28.30
   1 -28   0   11.30   11.40
  -1 -28   0   16.20    9.90
  -1 -28   0    0.20   12.10
  -1  28   0   12.00   15.10
   1  28   0   -2.60   15.40
   2 -28   0  924.21   34.00
  -2 -28   0  856.41   31.40
  -2  28   0  906.71   40.30
   2  28   0  828.02   38.40
   3 -28   0   36.10   13.60
  -3 -28   0   45.10   12.30
   3  28   0   12.30   15.70
  -3  28   0   34.40   16.30
   4 -28   0 1236.68   44.50
  -4  28   0 1294.47   49.10
   4  28   0 1287.47   48.10
   5 -28   0   19.60   14.10
   5  28   0   15.50   15.30
  -5  28   0   -5.70   14.30
   6 -28   0   40.40   16.20
  -6  28   0    5.50   15.20
   7 -28   0   -9.40   15.80
  -7  28   0   17.70   16.80
   8 -28   0  973.80   45.90
  -8  28   0 1023.60   46.00
   9 -28   0  206.38   29.40
  -9  28   0  249.48   29.20
  10 -28   0  166.68   25.40
 -10  28   0  184.28   28.10
  11 -28   0  139.69   25.10
 -11  28   0   68.69   20.50
  12 -28   0  188.08   29.30
 -12  28   0  201.48   30.60
  13 -28   0   -7.00   20.00
 -13  28   0   18.00   19.00
   0 -29   0   -0.30   10.40
   0  29   0   15.70   15.70
  -1 -29   0  243.38   20.80
   1 -29   0  261.07   20.70
  -1  29   0  275.97   27.50
   1  29   0  290.67   27.60
   2 -29   0  160.48   20.30
  -2 -29   0  170.68   18.30
  -2  29   0  129.39   20.60
   2  29   0  187.98   24.60
   3 -29   0    2.20   13.00
  -3 -29   0   22.20   14.30
   3  29   0   26.70   16.40
  -3  29   0    9.10   15.30
   4 -29   0  296.97   25.50
   4  29   0  270.27   27.40
  -4  29   0  299.57   28.90
   5 -29   0  373.96   28.00
   5  29   0  326.87   30.60
  -5  29   0  402.06   30.50
   6 -29   0   23.80   15.90
  -6  29   0   41.20   17.00
   6  29   0   13.00   17.40
   7 -29   0   -4.00   15.70
  -7  29   0   -0.40   15.80
   8 -29   0  431.66   34.30
  -8  29   0  452.15   33.50
   9 -29   0   -9.20   17.20
  -9  29   0   29.30   17.00
  10 -29   0  497.45   38.60
 -10  29   0  487.95   36.00
  11 -29   0  207.38   33.30
 -11  29   0  204.28   30.50
  12 -29   0   82.79   24.20
 -12  29   0  112.59   23.40
   0  30   0  166.78   22.40
   1 -30   0  223.98   20.30
  -1 -30   0  200.98   20.40
  -1  30   0  216.18   26.60
   1  30   0  248.38   27.50
   2 -30   0   99.89   15.70
  -2 -30   0   94.59   15.50
   2  30   0  142.09   20.80
  -2  30   0  154.18   25.70
   3 -30   0   72.89   15.40
  -3  30   0   74.29   18.80
   3  30   0   88.09   18.90
   4 -30   0    1.90   14.40
  -4  30   0    6.20   16.10
   4  30   0    3.50   15.80
   5 -30   0  466.75   30.30
  -5  30   0  452.65   32.90
   5  30   0  408.46   31.90
   6 -30   0  675.33   36.60
  -6  30   0  632.54   37.20
   6  30   0  703.03   38.50
   7 -30   0  189.58   27.00
  -7  30   0  196.98   27.80
   8 -30   0  306.87   30.40
  -8  30   0  227.58   29.80
   9 -30   0   22.50   18.20
  -9  30   0   25.80   17.40
  10 -30   0   -7.00   17.80
 -10  30   0   20.80   18.00
  11 -30   0   -9.50   18.80
 -11  30   0   24.00   19.30
  12 -30   0  222.18   33.70
 -12  30   0  196.28   31.40
   0  31   0   11.30   16.10
  -1 -31   0   26.10   13.80
   1 -31   0   25.30   16.10
   1  31   0   19.20   17.40
  -1  31   0   73.79   19.00
   2 -31   0  -13.20   12.20
   2  31   0    6.40   16.30
  -2  31   0   24.20   17.60
   3 -31   0 1058.29   39.80
  -3  31   0  974.10   45.00
   3  31   0 1031.20   44.40
   4 -31   0   22.60   14.70
   4  31   0   25.70   17.70
  -4  31   0   15.00   16.80
   5 -31   0    0.90   15.30
  -5  31   0   22.00   17.20
   5  31   0   35.60   17.90
   6 -31   0   -3.10   14.50
   6  31   0   25.10   19.30
  -6  31   0   27.50   17.10
   7 -31   0   26.20   17.10
   7  31   0   60.59   20.00
  -7  31   0   19.00   16.70
   8 -31   0   35.50   18.70
  -8  31   0   93.19   21.30
   9 -31   0  765.92   43.90
  -9  31   0  805.92   44.20
  10 -31   0  168.98   26.30
 -10  31   0  202.08   27.70
  11 -31   0   23.20   20.50
 -11  31   0   35.50   19.50
   0 -32   0  128.89   20.70
   0  32   0  127.09   22.20
  -1  32   0  311.87   31.20
   1  32   0  327.77   30.10
   2 -32   0  288.77   24.80
   2  32   0  253.77   29.30
  -2  32   0  238.08   29.70
   3 -32   0   16.20   15.00
  -3  32   0   27.60   18.10
   3  32   0   33.30   17.50
   4 -32   0  438.36   29.10
  -4  32   0  409.16   33.90
   4  32   0  386.26   32.30
   5 -32   0  513.55   32.20
   5  32   0  431.06   33.90
  -5  32   0  414.86   34.10
   6 -32   0   16.00   16.70
  -6  32   0    0.40   16.10
   6  32   0    9.60   19.70
   7 -32   0 1251.37   51.89
   7  32   0 1268.27   53.39
  -7  32   0 1181.18   52.69
   8 -32   0  197.88   30.60
  -8  32   0  226.98   30.30
   9 -32   0   68.09   22.00
  -9  32   0   49.20   20.30
  10 -32   0   75.59   22.40
 -10  32   0  169.38   26.20
  11 -32   0  312.87   36.60
 -11  32   0  293.37   33.50
   0 -33   0   -3.00   16.70
   0  33   0   15.30   18.00
  -1  33   0  123.89   22.80
   1  33   0  134.09   22.20
   2  33   0   19.60   19.30
  -2  33   0   20.40   18.50
   3 -33   0 1115.09   43.70
  -3  33   0 1042.00   49.20
   3  33   0 1099.59   48.00
   4 -33   0   41.70   16.70
  -4  33   0   49.90   19.60
   4  33   0   32.50   19.30
   5 -33   0    2.40   15.40
   5  33   0    9.60   19.30
  -5  33   0    8.20   17.50
   6 -33   0   92.69   19.40
   6  33   0   88.89   22.40
  -6  33   0  100.79   21.70
   7 -33   0   42.50   18.30
   7  33   0   10.00   20.10
  -7  33   0   23.90   18.70
   8 -33   0   90.59   21.60
  -8  33   0  113.19   23.20
   8  33   0  110.29   24.90
   9 -33   0 1073.59   50.89
  -9  33   0  998.80   50.39
  10 -33   0    5.80   19.10
 -10  33   0   -1.00   18.40
   0  34   0   58.59   20.90
  -1  34   0  138.29   23.90
   1  34   0  184.88   29.20
   2  34   0  130.09   22.70
  -2  34   0   88.79   22.50
   3  34   0   36.90   19.50
  -3  34   0   -4.60   17.90
   4 -34   0   36.70   17.60
  -4  34   0   30.70   19.00
   4  34   0   15.80   18.70
   5 -34   0    8.10   16.70
   5  34   0   11.50   18.60
  -5  34   0   21.80   19.40
   6 -34   0   42.10   18.10
  -6  34   0   69.39   20.90
   6  34   0   70.89   22.20
   7 -34   0  249.18   30.90
  -7  34   0  300.47   32.80
   7  34   0  253.37   33.10
   8 -34   0  181.28   25.00
   8  34   0  107.59   25.90
  -8  34   0  139.99   24.40
   9 -34   0   33.80   19.60
  -9  34   0   29.50   18.50
   9  34   0   25.00   22.20
   0  35   0  -24.40   18.70
   1  35   0  102.29   23.00
  -1  35   0   81.49   22.40
  -2  35   0   16.50   19.70
   2  35   0  -15.20   18.40
  -3  35   0   -2.70   18.10
   3  35   0   -6.70   18.20
  -4  35   0    8.30   19.00
   4  35   0   12.40   19.30
   5 -35   0    5.20   17.60
  -5  35   0  -21.60   17.30
   5  35   0   17.90   19.20
   6 -35   0   10.30   16.80
  -6  35   0   -0.80   18.40
   6  35   0   -3.70   19.40
   7 -35   0   27.70   18.40
  -7  35   0   10.30   18.50
   7  35   0   33.10   21.80
   8 -35   0   48.80   21.40
   8  35   0   54.79   23.70
  -8  35   0   26.50   19.80
   0  36   0  279.57   34.30
   1  36   0   62.79   21.30
  -1  36   0   35.20   21.20
  -2  36   0  204.38   30.80
   2  36   0  191.58   30.50
  -3  36   0  119.09   24.50
   3  36   0  194.28   30.60
   4  36   0   38.80   20.50
  -4  36   0   24.70   19.60
  -5  36   0  -11.30   17.80
   5  36   0  -11.60   18.80
   6 -36   0   20.30   24.90
   6  36   0   -0.90   20.50
  -6  36   0   -4.40   17.60
   7 -36   0  184.08   30.50
  -7  36   0  220.58   32.40
   7  36   0  127.09   25.90
   0  37   0   30.60   20.90
   1  37   0   10.50   20.50
  -1  37   0   24.70   19.70
  -2  37   0   32.90   20.40
   2  37   0   11.10   20.90
  -3  37   0  805.92   45.80
   3  37   0  775.52   45.40
   4  37   0   16.80   21.00
  -4  37   0   19.70   19.00
   5  37   0  -13.80   20.60
  -5  37   0  -28.20   17.00
  -6  37   0   56.89   21.60
   6  37   0    2.00   20.10
   0  38   0   60.09   24.30
  -1  38   0  382.26   37.30
   1  38   0  420.56   37.90
  -2  38   0   77.19   24.40
   2  38   0   94.99   24.50
  -3  38   0   24.40   20.10
   3  38   0   27.60   22.30
   4  38   0  132.49   26.40
  -4  38   0   76.49   22.60
   0  39   0  -33.10   19.70
   1  39   0   81.59   24.10
  -1  39   0   92.19   25.20
 -19   0   1    6.20   23.40
  19   0  -1   59.39   24.50
  18   0  -1   -6.70   19.50
 -18   0   1   27.50   22.80
  17   0  -1    1.60   19.40
 -17   0   1  -20.10   19.10
  16   0  -1   19.60   19.40
 -16   0   1   -1.00   18.40
  15   0  -1   29.20   18.10
 -15   0   1   11.90   17.80
 -14   0   1   13.90   16.30
  14   0  -1    5.30   15.90
 -13   0   1    2.90   14.00
  13   0  -1    3.00   14.40
  12   0  -1    5.30   13.40
 -12   0   1   -0.50   12.50
  11   0  -1   44.30   13.60
 -11   0   1   19.40   12.10
  10   0  -1  -20.20    9.80
 -10   0   1   -5.70   10.30
  -9   0   1    7.30   10.00
   9   0  -1   25.50   10.80
   8   0  -1   12.70    9.60
  -8   0   1   18.80    9.70
   7   0  -1   17.30    9.20
   7   0  -1   -2.50    7.80
  -7   0   1    9.60    8.60
  -6   0   1   -7.50    7.70
   6   0  -1   -8.10    6.80
  -6   0   1   -8.00    6.40
   6   0  -1    6.20    8.00
   6   0  -1    4.30    8.50
  -5   0   1    6.20    7.80
  -5   0   1  -10.20    7.20
   5   0  -1   -9.30    8.40
   5   0  -1    1.70    7.30
   5   0  -1    1.00    7.30
   4   0  -1   -2.60    6.90
   4   0  -1  -10.00    7.00
  -4   0   1   -7.10    6.80
  -4   0   1    0.40    6.80
   3   0  -1    6.00    5.50
  -3   0   1   -6.20    5.50
  -3   0   1    4.30    5.50
  -2   0   1   -4.20    3.80
  -2   0   1   -3.70    4.10
   2   0  -1   -5.80    1.40
   2   0  -1   -4.60    3.80
   1   0  -1  -10.40    2.30
   1   0  -1  -14.50    2.20
   1   0  -1  -12.00    2.40
  -1   0   1  -13.00    1.90
  -1   0   1  -12.40    2.30
   0   0   1   -4.40    2.00
   0   0   1   -6.20    0.60
   1   0   1  -10.90    3.40
  -1   0  -1   -4.60    3.10
  -1   0  -1   -6.80    2.20
   1   0   1   -6.10    2.70
   2   0   1    0.70    4.80
  -2   0  -1   -5.70    3.90
   2   0   1    1.50    4.50
  -2   0  -1    1.60    4.70
  -3   0  -1   -3.20    5.40
  -3   0  -1    0.10    5.80
   3   0   1    9.20    6.30
   3   0   1    0.40    6.40
  -4   0  -1    2.10    6.80
   4   0   1   -6.20    7.70
   4   0   1    0.10    7.10
  -4   0  -1    5.40    6.40
  -5   0  -1   -1.90    6.90
  -5   0  -1    3.40    7.00
   5   0   1    9.10    8.80
   5   0   1   -3.30    8.30
   6   0   1   17.00    8.10
   6   0   1   -8.00    8.70
  -6   0  -1   -4.90    7.50
  -6   0  -1    5.20    7.60
  -7   0  -1   -6.30    7.90
  -7   0  -1    8.70    8.60
  -8   0  -1   15.80    9.10
  -8   0  -1    9.20    9.10
   8   0   1    4.20   10.00
  -9   0  -1  -16.70    9.10
   9   0   1   -0.90   10.50
  -9   0  -1   -0.10    9.40
 -10   0  -1   21.20   11.10
  10   0   1    0.00   11.40
 -10   0  -1    2.40   11.10
  11   0   1   -9.50   12.80
 -11   0  -1  -12.30   11.30
  12   0   1    1.30   14.40
 -12   0  -1   -6.80   13.00
  13   0   1   46.50   16.80
 -13   0  -1   34.20   15.40
 -14   0  -1   17.50   16.20
  14   0   1   25.80   16.80
 -15   0  -1  -17.80   17.40
  15   0   1   28.10   18.20
  16   0   1   -8.10   19.60
 -16   0  -1    5.10   18.90
 -17   0  -1    2.70   19.80
  17   0   1   -3.10   20.10
  18   0   1  -13.70   19.60
 -18   0  -1   -1.50   21.90
 -19  -1   1  184.58   31.50
  19  -1  -1  130.89   27.10
  19   1  -1  218.98   35.30
 -19   1   1  165.58   28.60
  18  -1  -1   87.69   24.00
 -18  -1   1   95.69   26.50
  18   1  -1  138.49   24.70
 -18   1   1   56.19   24.80
  17  -1  -1   88.69   22.80
 -17  -1   1   25.20   21.50
  17   1  -1  120.39   23.10
 -17   1   1   54.49   21.80
 -16  -1   1  195.58   30.40
  16  -1  -1  227.38   32.40
  16   1  -1  182.68   31.10
 -16   1   1  197.98   30.30
 -15  -1   1  322.17   30.70
  15  -1  -1  402.66   33.40
 -15   1   1  318.47   30.70
  15   1  -1  420.16   33.10
  14  -1  -1  154.48   21.60
 -14  -1   1  110.39   19.40
  14   1  -1  150.08   25.00
 -14   1   1  116.79   19.50
 -13  -1   1  131.39   18.70
  13  -1  -1  139.19   23.40
  13   1  -1  171.98   24.30
 -13   1   1  129.69   18.70
 -12  -1   1    9.00   12.90
  12  -1  -1   -7.50   13.30
 -12   1   1    4.40   12.60
  12   1  -1   15.90   13.20
  11  -1  -1 1153.08   40.60
 -11  -1   1 1086.19   38.70
 -11   1   1 1064.89   38.50
  11   1  -1 1219.58   39.90
  10  -1  -1  261.27   21.30
 -10  -1   1  251.67   20.00
  10   1  -1  275.27   20.50
 -10   1   1  269.67   20.30
  -9  -1   1  282.57   19.90
   9  -1  -1  287.37   20.30
  -9   1   1  297.07   19.60
   9   1  -1  341.27   20.20
   8  -1  -1 1206.98   36.70
  -8  -1   1 1137.29   35.30
   8   1  -1 1161.88   33.70
   8   1  -1 1192.38   35.60
  -8   1   1 1134.19   35.20
  -7  -1   1  746.23   25.60
   7  -1  -1  712.83   26.30
   7  -1  -1  722.93   24.10
   7   1  -1  696.33   23.40
   7   1  -1  715.13   25.20
  -7   1   1  751.82   25.70
  -6  -1   1 1645.24   42.20
   6  -1  -1 1662.73   41.00
   6  -1  -1 1590.44   42.50
   6  -1  -1 1629.64   42.30
   6   1  -1 1626.64   42.30
   6   1  -1 1614.04   41.50
   6   1  -1 1611.54   40.10
  -6   1   1 1568.24   41.90
  -5  -1   1  171.88   13.10
   5  -1  -1  168.08   13.60
  -5  -1   1  154.48   12.70
   5  -1  -1  156.58   13.00
   5  -1  -1  182.18   14.80
  -5   1   1  171.88   13.10
   5   1  -1  177.38   12.60
   5   1  -1  164.28   12.10
  -5   1   1  164.18   13.30
   5   1  -1  166.18   14.40
   4  -1  -1 1049.00   28.50
   4  -1  -1  992.90   28.00
  -4  -1   1 1060.49   27.30
  -4  -1   1 1010.10   27.80
   4   1  -1 1023.80   27.10
  -4   1   1 1052.99   28.20
  -4   1   1 1033.90   27.70
   4   1  -1 1094.09   28.40
   4   1  -1 1036.00   26.20
  -3  -1   1 1122.29   27.60
  -3  -1   1 1161.78   28.70
   3  -1  -1 1148.19   28.70
   3   1  -1 1142.29   27.70
   3   1  -1 1099.99   34.20
  -3   1   1 1164.18   28.70
  -3   1   1 1166.98   28.80
  -2  -1   1 2746.73   58.69
  -2  -1   1 2693.73   58.09
   2  -1  -1 2687.23   58.69
  -2   1   1 2595.04   58.59
   2   1  -1 2635.14   57.89
  -2   1   1 2738.43   58.69
  -1  -1   1  197.18    6.80
   1  -1  -1  199.88    6.70
  -1  -1   1  201.68    6.10
   1   1  -1  202.08    6.00
  -1   1   1  196.68    6.50
   1   1  -1  209.48    6.70
   0  -1   1 1393.96   27.60
   0   1   1 1419.96   28.00
   0   1   1 1099.69   27.50
   0   1  -1 1072.49   27.30
  -1  -1  -1 2486.45   53.19
  -1  -1  -1 2460.15   51.79
   1  -1   1 2388.36   52.39
   1   1   1 2469.65   51.89
   1   1   1 2530.85   53.29
  -1   1  -1 2333.87   52.29
  -1   1  -1 2484.85   53.39
   2  -1   1   11.00    5.10
  -2  -1  -1   10.10    4.80
  -2  -1  -1    7.50    4.00
   2  -1   1   10.80    5.00
   2   1   1   10.70    4.90
  -2   1  -1    4.30    4.10
   2   1   1    8.20    4.50
  -2   1  -1   12.90    5.00
   3  -1   1  126.29   11.10
  -3  -1  -1  150.08   10.40
  -3  -1  -1  132.59    9.50
   3  -1   1  123.09   10.60
  -3   1  -1  149.69   11.10
   3   1   1  138.29   10.50
  -3   1  -1  126.39    9.70
   3   1   1  143.99   10.10
  -4  -1  -1  418.96   16.00
   4  -1   1  396.16   16.70
  -4  -1  -1  378.26   14.90
   4  -1   1  383.26   16.90
  -4   1  -1  412.96   16.30
   4   1   1  432.26   17.20
   4   1   1  394.16   16.30
  -4   1  -1  416.66   15.60
  -5  -1  -1   16.50    7.30
   5  -1   1   13.90    8.90
  -5  -1  -1   12.00    7.20
   5  -1   1   12.10    8.30
  -5   1  -1   -4.40    7.10
  -5   1  -1   10.00    7.30
   5   1   1   14.70    8.40
   5   1   1   14.60    8.10
   6  -1   1  132.19   13.90
  -6  -1  -1  156.98   13.40
  -6  -1  -1  139.99   13.20
   6  -1   1  141.99   13.60
   6   1   1  129.29   14.00
  -6   1  -1  127.99   13.10
  -6   1  -1  151.98   13.60
   6   1   1  137.19   13.10
  -7  -1  -1  293.07   17.00
  -7  -1  -1  310.87   16.70
  -7   1  -1  327.77   17.70
  -7   1  -1  291.37   16.70
  -8  -1  -1  648.04   24.80
   8  -1   1  679.93   26.90
  -8  -1  -1  627.74   24.90
  -8   1  -1  627.54   25.40
  -8   1  -1  682.13   25.00
  -9  -1  -1   -1.30    9.70
   9  -1   1   -4.50   10.50
  -9  -1  -1    6.50    9.80
   9   1   1   14.90   11.00
  -9   1  -1    5.40    9.70
  -9   1  -1   13.40   10.30
 -10  -1  -1 1050.19   36.00
  10  -1   1  989.80   37.50
 -10  -1  -1 1043.40   35.40
  10   1   1 1007.10   36.50
 -10   1  -1 1006.90   35.10
 -11  -1  -1   48.70   13.50
  11  -1   1   72.69   15.40
 -11   1  -1   65.39   14.20
  11   1   1   61.29   14.70
 -12  -1  -1   26.80   14.20
  12  -1   1   47.30   16.20
 -12   1  -1   42.50   14.60
  12   1   1   48.70   16.30
 -13  -1  -1  562.24   31.90
  13  -1   1  575.84   34.30
 -13   1  -1  600.24   32.10
  13   1   1  593.34   33.80
 -14  -1  -1   14.20   16.50
  14  -1   1   50.79   18.80
  14   1   1   11.60   17.20
 -14   1  -1   13.60   15.80
 -15  -1  -1  194.28   28.30
  15  -1   1  238.38   31.20
 -15   1  -1  255.67   29.70
  15   1   1  170.08   24.60
  16  -1   1  112.39   24.50
 -16  -1  -1  168.08   24.90
  16   1   1  149.69   24.20
 -16   1  -1  128.39   23.50
  17  -1   1   40.60   22.30
 -17  -1  -1   32.50   21.50
 -17   1  -1   44.60   22.00
  17   1   1   71.39   22.70
 -18  -1  -1   -3.50   21.30
  18  -1   1   29.10   20.70
  18   1   1    3.50   19.60
 -18   1  -1    1.90   21.70
  19  -2  -1   46.50   23.60
 -19   2   1   66.19   26.30
  19   2  -1   58.59   23.50
  18  -2  -1  -17.10   20.00
  18   2  -1   78.19   22.40
 -18   2   1   -5.50   20.90
 -17  -2   1  174.08   25.90
  17  -2  -1  236.68   34.40
  17   2  -1  257.87   31.80
 -17   2   1  200.58   27.70
  16  -2  -1   72.09   22.30
 -16  -2   1   64.39   21.20
  16   2  -1   84.09   20.30
 -16   2   1   52.59   20.40
  15  -2  -1 1678.33   60.49
 -15  -2   1 1747.53   59.19
 -15   2   1 1732.23   59.09
  15   2  -1 1832.22   60.79
  14  -2  -1  288.27   28.90
 -14  -2   1  269.67   28.00
  14   2  -1  325.07   28.00
 -14   2   1  339.77   27.80
  13  -2  -1  127.29   19.20
 -13  -2   1   93.99   17.50
 -13   2   1   78.09   16.90
  13   2  -1  112.19   17.90
  12  -2  -1   95.59   17.40
 -12  -2   1   62.39   14.90
 -12   2   1   79.29   15.40
  12   2  -1   67.69   15.10
  11  -2  -1   72.49   15.10
 -11  -2   1   48.50   13.20
 -11   2   1   50.79   13.80
  11   2  -1   65.39   13.90
 -10  -2   1  275.67   20.60
  10  -2  -1  278.47   21.60
 -10   2   1  253.87   19.90
  10   2  -1  283.97   20.30
  -9  -2   1 5811.82  132.99
   9  -2  -1 5697.73  134.49
  -9   2   1 5823.72  132.89
   9   2  -1 5996.20  132.59
  -8  -2   1 1356.26   39.80
   8  -2  -1 1350.66   41.00
   8   2  -1 1420.56   39.30
   8   2  -1 1362.56   37.20
  -8   2   1 1385.66   39.80
   7  -2  -1  453.55   21.80
   7  -2  -1  465.75   20.10
  -7  -2   1  489.85   21.20
   7   2  -1  520.05   20.30
   7   2  -1  476.95   18.70
  -7   2   1  461.05   20.50
  -6  -2   1   35.50    9.10
   6  -2  -1   25.40    9.40
   6  -2  -1   25.20    9.10
   6  -2  -1   33.70    8.40
   6   2  -1   31.20    7.40
  -6   2   1   21.10    8.40
  -6   2   1   42.70    9.10
   6   2  -1   27.90    8.10
   6   2  -1   33.10    9.10
  -5  -2   1  624.04   21.60
   5  -2  -1  661.43   22.30
  -5  -2   1  668.13   20.80
   5  -2  -1  634.34   22.40
   5   2  -1  643.94   20.30
   5   2  -1  650.83   19.30
   5   2  -1  652.43   22.10
  -5   2   1  613.44   21.60
  -5   2   1  619.44   21.30
   4  -2  -1 2414.26   56.49
   4  -2  -1 2176.28   53.39
  -4  -2   1 2300.97   51.89
  -4  -2   1 2321.37   53.39
   4   2  -1 2308.57   53.19
   4   2  -1 2238.98   50.79
  -4   2   1 2282.37   53.19
   4   2  -1 2284.67   51.89
  -4   2   1 2214.98   53.49
  -3  -2   1 8720.93  189.98
   3  -2  -1 9032.30  191.68
  -3  -2   1 9091.49  191.48
   3   2  -1 9151.48  191.78
  -3   2   1 9232.58  191.38
   3   2  -1 8938.31  189.98
   2  -2  -1  112.09    7.00
   2  -2  -1  142.19    8.40
  -2  -2   1  155.28    7.00
  -2   2   1  165.18    8.10
   2   2  -1  155.88    6.90
  -1  -2   1   59.79    4.80
   1  -2  -1   32.70    4.60
   1  -2  -1   56.49    4.90
  -1  -2   1   60.29    3.50
  -1   2   1   58.99    4.90
   1   2  -1   54.19    4.50
  -1   2   1   65.39    6.10
   1   2  -1   51.89    3.40
   0  -2   1  156.38    6.20
   0  -2  -1  155.18    5.20
   0   2   1  153.38    6.90
   0   2  -1  152.98    6.10
   0   2   1  148.39    6.70
   0   2   1  163.68    5.20
   1  -2   1 1343.87   30.00
  -1  -2  -1 1321.57   30.10
   1   2   1 1325.27   29.90
  -1   2  -1 1354.96   30.50
   1   2   1 1329.17   30.30
  -1   2  -1 1289.27   29.70
  -2  -2  -1 3237.48   69.69
  -2  -2  -1 3261.07   68.89
   2  -2   1 3196.58   69.39
   2   2   1 3250.57   69.69
   2   2   1 3179.58   68.79
  -2   2  -1 3116.29   69.29
  -2   2  -1 3160.18   70.19
  -3  -2  -1 4982.10  108.29
   3  -2   1 5056.19  108.89
   3  -2   1 5176.88  109.79
  -3  -2  -1 5061.79  108.89
  -3   2  -1 4891.41  108.69
  -3   2  -1 5061.99  109.69
   3   2   1 5136.49  108.99
   3   2   1 5030.30  108.29
   4  -2   1  138.59   13.20
  -4  -2  -1  134.79   11.50
  -4  -2  -1  159.68   11.10
   4  -2   1  158.88   13.00
   4   2   1  167.38   12.60
   4   2   1  163.18   12.90
  -4   2  -1  143.69   11.70
  -4   2  -1  151.28   12.40
   5  -2   1  554.54   21.00
   5  -2   1  577.84   20.70
  -5  -2  -1  529.35   19.10
  -5  -2  -1  572.54   19.60
   5   2   1  563.44   20.20
  -5   2  -1  575.84   20.30
  -5   2  -1  558.14   19.90
   5   2   1  549.54   19.60
   6  -2   1 1605.94   41.60
  -6  -2  -1 1532.75   40.60
  -6  -2  -1 1582.54   41.10
  -6   2  -1 1568.34   41.90
  -6   2  -1 1584.54   41.20
   6   2   1 1598.34   40.80
   6   2   1 1573.74   41.00
  -7  -2  -1   -3.00    8.30
  -7  -2  -1   -4.30    8.00
  -7   2  -1   -1.60    8.30
  -7   2  -1   19.50    8.90
  -8  -2  -1 2309.77   56.59
   8  -2   1 2134.69   58.09
  -8  -2  -1 2113.09   55.19
  -8   2  -1 2189.48   55.99
  -8   2  -1 2179.48   57.09
   9  -2   1 2712.53   71.99
  -9  -2  -1 2808.62   70.09
  -9  -2  -1 2775.42   69.19
   9   2   1 2691.83   70.39
  -9   2  -1 2799.82   69.69
  -9   2  -1 2829.02   71.09
  10  -2   1  239.58   21.40
 -10  -2  -1  222.28   19.30
 -10  -2  -1  242.48   20.20
 -10   2  -1  232.18   20.00
  10   2   1  244.48   20.50
  11  -2   1  174.98   22.10
 -11  -2  -1  132.59   19.60
 -11  -2  -1  142.19   20.00
  11   2   1  150.48   20.90
 -11   2  -1  112.29   15.60
  12  -2   1   48.80   16.70
 -12  -2  -1   85.29   16.00
 -12   2  -1   87.79   16.00
  12   2   1   98.49   17.40
 -13  -2  -1  340.17   27.30
  13  -2   1  368.56   29.90
  13   2   1  365.46   28.00
 -13   2  -1  440.86   28.30
  14  -2   1 1308.57   53.29
 -14  -2  -1 1440.36   50.79
 -14   2  -1 1396.46   49.60
  14   2   1 1437.96   52.69
  15  -2   1  340.07   33.70
 -15  -2  -1  416.26   33.30
  15   2   1  462.65   34.40
 -15   2  -1  399.56   31.40
 -16  -2  -1   13.70   19.70
  16  -2   1   59.19   22.00
  16   2   1   46.70   19.50
 -16   2  -1   13.00   20.40
 -17  -2  -1   12.10   22.10
  17  -2   1   21.10   22.00
  17   2   1   57.09   22.00
 -17   2  -1   73.09   23.60
  18  -2   1   12.90   21.30
 -18   2  -1   -3.90   22.20
  18   2   1   11.60   19.90
  19  -3  -1  184.08   29.40
 -19   3   1  228.18   37.50
  19   3  -1  226.28   38.20
  18  -3  -1   89.99   25.20
  18   3  -1   72.49   22.90
 -18   3   1   97.19   25.70
  17  -3  -1  482.35   39.30
 -17   3   1  441.56   37.40
  17   3  -1  489.45   36.70
  16  -3  -1  459.65   37.20
 -16  -3   1  375.86   34.00
  16   3  -1  461.95   34.60
 -16   3   1  431.06   34.80
 -15  -3   1  930.91   43.20
  15  -3  -1  898.91   45.30
  15   3  -1  944.51   43.30
 -15   3   1  889.91   42.40
  14  -3  -1   53.99   17.50
 -14  -3   1    8.70   16.40
 -14   3   1   21.30   15.90
  14   3  -1   16.70   16.60
  13  -3  -1  171.98   24.70
 -13  -3   1  116.69   18.20
 -13   3   1  129.59   18.70
  13   3  -1  154.18   23.00
  12  -3  -1  300.97   25.50
 -12  -3   1  212.38   23.10
  12   3  -1  272.17   23.60
 -12   3   1  290.77   23.70
 -11  -3   1 1523.95   47.00
  11  -3  -1 1467.85   48.50
  11   3  -1 1537.15   46.50
 -11   3   1 1508.65   47.00
 -10  -3   1  404.96   23.20
  10  -3  -1  427.46   24.90
  10   3  -1  417.46   22.80
 -10   3   1  391.66   22.60
  -9  -3   1 3712.13   88.69
   9  -3  -1 3667.43   90.49
  -9   3   1 3617.44   88.49
   9   3  -1 3745.53   87.59
  -8  -3   1  840.52   28.70
   8  -3  -1  770.82   29.80
   8   3  -1  808.52   26.20
  -8   3   1  802.62   28.20
   8   3  -1  835.92   27.70
  -7  -3   1 1751.12   47.40
   7  -3  -1 1753.52   48.70
   7   3  -1 1872.21   44.90
  -7   3   1 1833.72   47.80
   7   3  -1 1879.01   46.20
   6  -3  -1   74.79    9.80
   6  -3  -1   81.89   14.00
   6  -3  -1   80.29   13.60
  -6  -3   1   56.39    9.60
  -6   3   1   96.79   11.20
   6   3  -1   81.59   10.20
   6   3  -1   67.79   11.20
  -6   3   1   69.39    9.90
   6   3  -1   76.39   10.40
   5  -3  -1 8488.35  186.18
   5  -3  -1 8923.51  185.68
  -5  -3   1 8611.34  185.38
  -5  -3   1 8788.32  183.48
   5   3  -1 8546.84  182.48
   5   3  -1 8467.35  185.18
  -5   3   1 8529.35  185.48
   5   3  -1 8582.74  183.38
  -4  -3   1 1271.47   30.60
  -4  -3   1 1314.97   33.10
   4  -3  -1 1201.68   33.10
   4   3  -1 1259.17   32.50
   4   3  -1 1253.37   30.50
  -4   3   1 1279.77   32.70
   4   3  -1 1224.68   29.30
   3  -3  -1 5255.07  115.19
  -3  -3   1 5131.59  112.59
  -3   3   1 5573.14  114.89
   3   3  -1 5212.58  112.49
   3   3  -1 5163.48  111.79
   3   3  -1 5561.74  114.89
  -2  -3   1 2247.68   48.40
   2  -3  -1 2262.27   50.09
   2  -3  -1 2274.57   50.59
   2   3  -1 2194.08   48.30
  -2   3   1 2234.48   50.09
  -2   3   1 2271.87   50.69
  -1  -3   1 1524.75   33.60
   1  -3  -1 1517.35   34.70
   1  -3  -1 1548.65   34.30
   1   3  -1 1536.25   33.60
  -1   3   1 1544.95   35.00
   1   3  -1 1504.45   32.80
  -1   3   1 1536.95   34.30
   0  -3   1  929.01   22.00
   0  -3  -1  956.20   22.60
   0  -3  -1  978.80   22.30
   0  -3  -1  979.00   21.90
   0   3   1  946.81   21.80
   0   3   1  968.60   22.90
   0   3  -1  922.91   22.00
   0   3   1  938.71   22.40
   1  -3   1 9872.31  207.28
   1  -3   1 9999.00  207.08
  -1  -3  -1 9799.22  206.98
  -1  -3  -1 9989.50  206.48
  -1   3  -1 9799.52  206.98
   1   3   1 9899.11  206.98
   1   3   1 9847.81  206.38
  -1   3  -1 9703.33  207.28
  -2  -3  -1 2664.93   58.79
   2  -3   1 2684.53   59.09
   2   3   1 2666.93   58.19
  -2   3  -1 2659.23   59.69
   2   3   1 2683.83   58.79
  -2   3  -1 2664.33   58.99
   3  -3   1 1906.21   44.10
   3  -3   1 1910.61   46.90
  -3  -3  -1 1872.81   43.40
  -3   3  -1 1858.41   44.70
  -3   3  -1 1864.11   43.90
   3   3   1 1884.61   43.40
   3   3   1 1837.12   43.00
  -4  -3  -1 2598.64   59.29
   4  -3   1 2626.94   60.29
  -4  -3  -1 2540.85   58.99
   4  -3   1 2629.04   60.59
   4   3   1 2600.04   59.19
  -4   3  -1 2540.35   59.59
   4   3   1 2653.73   59.39
  -4   3  -1 2552.94   60.39
   5  -3   1    6.70    7.30
  -5  -3  -1    6.80    7.00
  -5  -3  -1   -2.90    6.50
   5  -3   1    9.20    8.50
   5   3   1    4.20    6.80
   5   3   1    1.00    7.30
  -5   3  -1  -12.50    6.90
  -5   3  -1   -4.50    7.40
  -6  -3  -1  456.65   18.40
  -6  -3  -1  432.36   18.40
   6  -3   1  474.35   20.60
   6   3   1  428.36   19.20
  -6   3  -1  429.36   18.90
  -6   3  -1  425.46   19.20
   6   3   1  444.56   18.30
  -7  -3  -1 6056.29  136.59
  -7  -3  -1 6232.88  136.89
  -7   3  -1 6140.79  137.99
  -7   3  -1 6250.88  137.29
  -8  -3  -1  858.01   29.10
  -8  -3  -1  826.22   28.80
   8  -3   1  903.21   32.00
  -8   3  -1  887.01   30.40
  -8   3  -1  827.22   28.90
  -9  -3  -1   11.90   10.00
   9  -3   1   28.50   11.60
  -9  -3  -1   -1.30    9.50
   9   3   1   28.80   10.90
  -9   3  -1   18.00    9.70
 -10  -3  -1 1407.86   43.30
 -10  -3  -1 1460.65   44.20
  10  -3   1 1455.95   46.90
 -10   3  -1 1410.46   43.70
  10   3   1 1448.66   45.00
  11  -3   1   37.20   14.20
 -11  -3  -1   25.00   12.60
 -11  -3  -1    7.10   12.60
 -11   3  -1   35.00   12.80
  11   3   1   36.80   13.20
 -12  -3  -1    6.10   13.40
  12  -3   1   10.80   15.00
  12   3   1  -14.70   13.20
 -12   3  -1   21.70   13.60
 -13  -3  -1 1897.21   58.59
  13  -3   1 1900.81   62.69
  13   3   1 1995.10   61.39
 -13   3  -1 1992.00   59.19
 -14  -3  -1   51.09   17.60
  14  -3   1   36.00   18.30
 -14   3  -1   48.60   17.20
  14   3   1   73.19   18.30
 -15  -3  -1    4.70   18.00
  15  -3   1   14.70   19.30
  15   3   1   19.00   17.20
 -15   3  -1   43.00   18.30
  16  -3   1  398.36   37.60
 -16   3  -1  397.26   35.20
  16   3   1  374.36   34.70
  17  -3   1   23.70   21.50
  17   3   1   45.70   21.00
 -17   3  -1  -16.10   19.80
  18  -3   1   35.50   23.30
  18   3   1   35.20   21.60
 -18   3  -1   44.80   23.30
  19  -4  -1   31.80   23.80
 -19   4   1   -1.70   23.10
  18  -4  -1  -37.70   20.00
 -18   4   1  -25.40   20.60
  18   4  -1   23.30   21.10
  17  -4  -1   28.50   21.50
  17   4  -1   31.50   19.80
 -17   4   1   21.40   20.60
  16  -4  -1  137.29   25.10
  16   4  -1  138.59   22.30
 -16   4   1  112.79   22.20
  15  -4  -1  529.15   37.50
 -15   4   1  617.34   36.40
  15   4  -1  610.84   35.60
 -14  -4   1   41.60   17.60
  14  -4  -1   69.99   19.00
  14   4  -1   30.50   16.50
 -14   4   1   70.59   17.70
 -13  -4   1  315.47   26.70
  13  -4  -1  310.87   27.90
 -13   4   1  347.67   26.50
  13   4  -1  356.16   26.10
 -12  -4   1   83.89   15.80
  12  -4  -1   57.89   15.80
  12   4  -1   47.50   14.50
 -12   4   1   35.70   13.90
 -11  -4   1 1008.40   37.20
  11  -4  -1  981.20   38.50
 -11   4   1 1084.79   37.60
  11   4  -1  995.30   35.80
 -10  -4   1    7.80   11.40
  10  -4  -1   40.40   13.20
  10   4  -1   28.40   11.30
 -10   4   1    6.40   11.00
   9  -4  -1 2845.72   75.89
  -9  -4   1 3049.89   74.49
   9   4  -1 2954.30   74.09
   9   4  -1 3032.00   72.69
  -9   4   1 2994.50   74.29
   8  -4  -1   42.10   11.30
  -8  -4   1   40.60   10.50
  -8   4   1   26.00    9.90
   8   4  -1   15.00    9.40
   8   4  -1   38.10    9.40
   7  -4  -1 1950.20   52.59
  -7  -4   1 1999.40   51.19
   7   4  -1 1994.10   48.90
   7   4  -1 1988.30   47.70
  -7   4   1 1971.50   51.09
  -6  -4   1  911.01   28.30
   6  -4  -1  838.42   29.00
   6  -4  -1  915.01   31.70
  -6   4   1  909.11   28.30
  -6   4   1  883.31   28.40
   6   4  -1  893.81   27.90
   6   4  -1  905.31   25.60
   6   4  -1  881.91   24.40
  -5  -4   1  315.07   13.30
   5  -4  -1  324.97   17.20
   5  -4  -1  339.87   17.00
   5   4  -1  320.07   16.10
  -5   4   1  310.27   16.20
   5   4  -1  320.07   13.70
   5   4  -1  319.27   12.90
   4  -4  -1  310.87   15.50
  -4  -4   1  289.37   11.30
   4   4  -1  294.97   14.80
   4   4  -1  288.77   11.70
   4   4  -1  285.87   10.50
  -4   4   1  272.87   14.70
  -3   4   1 5375.36  116.19
   2  -4  -1  157.18    9.30
   2  -4  -1  163.58    9.90
  -2   4   1  150.88    9.40
  -2   4   1  130.09   10.50
  -1  -4   1 4435.26   95.09
   1  -4  -1 4493.35   97.19
   1  -4  -1 4576.64   96.89
  -1   4   1 4576.24   97.29
  -1   4   1 4612.14   96.89
   0  -4  -1 2335.57   51.49
   0  -4   1 2339.97   50.69
   0  -4  -1 2368.66   50.89
   0   4  -1 2240.68   50.59
   0   4   1 2356.36   50.89
   0   4   1 2339.17   50.89
  -1  -4  -1  527.65   15.00
  -1  -4  -1  552.94   14.40
   1  -4   1  547.85   15.60
   1  -4   1  551.74   16.10
   1   4   1  547.05   14.40
  -1   4  -1  537.05   15.70
   1   4   1  537.45   15.30
  -1   4  -1  529.25   15.70
   2  -4   1 2375.16   53.69
  -2  -4  -1 2360.86   52.79
  -2   4  -1 2327.37   53.49
   2   4   1 2394.16   52.89
  -2   4  -1 2433.16   54.09
  -3  -4  -1 3985.00   87.49
   3  -4   1 4081.59   88.49
   3   4   1 4035.90   87.49
  -3   4  -1 4051.39   89.09
  -3   4  -1 3971.20   88.39
   3   4   1 4006.00   87.49
   4  -4   1   40.50    8.00
   4  -4   1   39.80    8.50
  -4  -4  -1   44.40    7.10
   4   4   1   59.49    9.70
  -4   4  -1   23.30    7.80
  -4   4  -1   28.40    7.70
   4   4   1   33.60    7.30
   5  -4   1   36.50    8.90
   5  -4   1   42.60    8.80
  -5  -4  -1   68.69   11.30
  -5  -4  -1   42.90    8.00
  -5   4  -1   54.09    8.80
   5   4   1   68.29    8.50
   5   4   1   48.30    8.40
  -5   4  -1   60.49    9.40
  -6  -4  -1   10.60    7.90
   6  -4   1   22.10   10.30
  -6  -4  -1   16.70    7.60
  -6   4  -1    8.40    8.10
   6   4   1    7.60    8.80
  -6   4  -1    9.40    8.20
   6   4   1   12.40    8.40
  -7  -4  -1  255.67   15.70
  -7  -4  -1  224.38   16.10
  -7   4  -1  241.08   16.30
   7   4   1  254.77   15.80
  -7   4  -1  272.07   17.50
  -8  -4  -1 2380.66   59.49
   8  -4   1 2432.36   63.19
  -8  -4  -1 2286.87   59.39
  -8   4  -1 2370.16   60.19
   9  -4   1  782.42   31.50
  -9  -4  -1  724.73   27.90
  -9  -4  -1  726.53   27.50
  -9   4  -1  725.73   28.00
   9   4   1  719.03   28.70
 -10  -4  -1  202.58   19.80
  10  -4   1  219.88   21.80
 -10  -4  -1  238.08   19.70
  10   4   1  213.18   20.30
 -10   4  -1  197.18   18.70
 -11  -4  -1 1277.27   42.30
 -11  -4  -1 1322.07   42.70
  11  -4   1 1344.77   46.60
 -11   4  -1 1289.97   42.80
  11   4   1 1288.37   43.60
  12  -4   1  390.26   29.60
 -12  -4  -1  443.76   26.40
  12   4   1  427.16   28.40
 -12   4  -1  435.86   26.70
  13  -4   1  111.39   20.10
 -13  -4  -1   72.39   17.30
 -13   4  -1  138.49   22.90
 -14  -4  -1  789.22   36.60
  14  -4   1  754.82   40.50
 -14   4  -1  796.42   37.80
  14   4   1  713.23   37.50
  15  -4   1  210.68   31.20
 -15   4  -1  240.48   28.50
  15   4   1  181.28   28.20
  16  -4   1   -4.60   20.40
 -16   4  -1   12.10   19.40
  16   4   1   22.00   19.30
  17  -4   1  191.28   28.40
  17   4   1  127.49   23.40
 -17   4  -1  189.88   27.30
  18  -4   1  102.29   25.70
  18   4   1   72.29   23.40
 -18   4  -1   75.09   26.50
  19  -5  -1   70.69   24.50
 -19   5   1   29.10   25.00
  18  -5  -1   50.59   23.10
 -18   5   1   31.70   21.90
  18   5  -1   49.60   25.30
  17  -5  -1  233.18   35.90
 -17   5   1  198.58   32.40
  17   5  -1  206.48   30.90
  16  -5  -1  211.78   32.80
 -16   5   1  206.48   29.90
  16   5  -1  285.67   29.80
  15  -5  -1    1.30   17.30
  15   5  -1   59.49   17.80
 -15   5   1    0.60   16.90
  14  -5  -1   48.90   18.40
  14   5  -1   98.09   18.10
 -14   5   1   46.70   16.80
  13  -5  -1   32.90   16.30
 -13   5   1   35.00   14.90
  13   5  -1   18.40   15.10
  12  -5  -1 1202.08   45.70
 -12   5   1 1304.47   44.50
  12   5  -1 1307.47   42.90
 -11  -5   1  647.14   30.70
  11  -5  -1  696.23   33.00
 -11   5   1  751.02   31.10
  11   5  -1  737.93   30.00
 -10  -5   1  295.07   21.50
  10  -5  -1  304.27   23.00
 -10   5   1  310.97   21.40
  10   5  -1  317.17   20.20
   9  -5  -1   15.20   11.40
   9   5  -1   20.10   10.40
  -9   5   1   26.40   10.40
   9   5  -1   28.90   10.00
   8  -5  -1  164.28   17.90
   8   5  -1  177.48   14.40
   8   5  -1  188.28   15.20
  -8   5   1  184.58   16.00
   7  -5  -1   20.10   10.50
  -7   5   1   19.30    8.90
   7   5  -1   -5.70    6.90
   7   5  -1   14.90    8.60
   6  -5  -1  600.54   24.50
   6   5  -1  699.53   24.00
   6   5  -1  655.43   19.50
   6   5  -1  647.74   20.40
  -6   5   1  641.64   23.40
   5  -5  -1 2032.60   51.49
   5  -5  -1 2141.59   51.09
   5   5  -1 2089.49   50.69
  -5   5   1 2001.20   50.19
   5   5  -1 2012.30   46.00
   5   5  -1 1998.40   46.60
   4  -5  -1 2246.18   53.09
  -4  -5   1 2174.18   48.30
   4   5  -1 2128.49   48.20
   4   5  -1 2128.99   47.50
  -4   5   1 2177.88   51.89
   4   5  -1 2247.98   52.29
   3  -5  -1 1347.67   35.00
  -3   5   1 1363.26   33.90
   2  -5  -1  328.07   13.80
   2  -5  -1  366.56   13.80
  -2   5   1  390.86   15.10
  -2   5   1  318.47   13.40
   1  -5  -1 1206.88   28.30
  -1  -5   1 1149.08   25.90
   1  -5  -1 1142.29   28.40
  -1   5   1 1181.48   28.20
  -1   5   1 1183.88   28.60
   0  -5   1   13.50    4.30
   0  -5  -1    7.80    4.80
   0  -5  -1   14.40    4.80
   0   5   1    4.90    4.70
   0   5   1   10.50    4.90
   0   5  -1   10.70    4.40
   1  -5   1 5947.81  125.49
  -1  -5  -1 5770.02  124.99
   1  -5   1 5923.31  125.89
  -1  -5  -1 5926.51  124.09
  -1   5  -1 5933.91  125.89
   1   5   1 5818.02  124.89
  -1   5  -1 5782.32  125.39
   1   5   1 5919.91  123.99
  -2  -5  -1 3599.04   79.29
   2  -5   1 3865.21   81.89
   2  -5   1 3636.94   80.59
   2   5   1 3656.03   78.29
   2   5   1 3650.13   79.29
  -2   5  -1 3612.54   80.69
  -2   5  -1 3581.24   80.39
   3  -5   1  287.37   14.40
  -3  -5  -1  289.47   12.40
  -3   5  -1  288.27   13.50
  -3   5  -1  281.37   13.90
   3   5   1  283.57   12.20
  -4  -5  -1  310.77   13.70
   4  -5   1  344.77   16.00
  -4   5  -1  332.07   15.60
   4   5   1  349.17   14.00
   4   5   1  337.87   14.90
  -4   5  -1  313.47   15.10
   5  -5   1  199.48   16.70
  -5  -5  -1  207.48   12.80
   5  -5   1  202.08   15.40
  -5   5  -1  197.58   14.10
  -5   5  -1  187.08   13.70
   5   5   1  204.48   12.40
   5   5   1  188.88   13.20
  -6  -5  -1   -2.50    7.30
   6   5   1   13.30    7.70
   6   5   1  -11.90    8.40
  -6   5  -1    6.00    8.20
  -6   5  -1    7.50    8.40
   7  -5   1   52.29   11.60
  -7  -5  -1   50.49    9.40
   7   5   1   59.59    9.90
  -7   5  -1   55.09   10.00
  -8  -5  -1 1594.54   42.40
   8  -5   1 1487.05   45.80
  -8   5  -1 1472.55   42.90
  -9  -5  -1  294.87   19.40
   9  -5   1  275.77   21.70
  -9  -5  -1  284.87   18.80
  -9   5  -1  247.48   18.80
   9   5   1  295.87   20.30
  10  -5   1  147.49   20.60
 -10  -5  -1  127.49   18.10
 -10  -5  -1  169.68   17.90
 -10   5  -1  146.89   18.70
  10   5   1  191.68   19.80
  11  -5   1   26.80   13.90
 -11  -5  -1    5.80   11.90
  11   5   1   35.50   14.30
 -11   5  -1    2.00   11.80
 -12  -5  -1   11.50   14.10
  12  -5   1   35.40   16.30
 -12   5  -1   23.60   14.10
  12   5   1   15.80   14.70
  13  -5   1   21.80   16.60
 -13   5  -1   37.80   15.50
  13   5   1   44.60   16.70
  14  -5   1  378.46   32.30
  14   5   1  357.76   30.40
 -14   5  -1  348.77   29.40
  15  -5   1  518.65   37.40
 -15   5  -1  545.75   36.20
  15   5   1  567.94   35.80
  16  -5   1  154.88   26.90
 -16   5  -1  195.78   29.10
  16   5   1  177.98   29.80
  17  -5   1    7.00   20.80
  17   5   1   15.00   19.00
 -17   5  -1   14.90   21.10
  18  -5   1   53.39   22.60
 -18   5  -1   11.10   22.90
  19  -6  -1  124.89   27.20
 -19   6   1   79.59   27.20
  18  -6  -1  -10.80   19.70
 -18   6   1    3.80   21.70
  17  -6  -1   85.69   24.50
  17   6  -1   56.59   20.50
 -17   6   1  125.09   24.20
  16  -6  -1   50.59   21.60
  16   6  -1   50.49   18.80
 -16   6   1   57.99   20.60
  15  -6  -1   38.70   18.80
  15   6  -1    4.80   16.00
 -15   6   1   13.40   17.10
  14  -6  -1  472.15   33.90
  14   6  -1  448.76   29.40
 -14   6   1  499.45   31.50
  13  -6  -1  639.74   36.50
  13   6  -1  691.63   33.00
 -13   6   1  650.03   33.10
  12  -6  -1  109.49   18.90
 -12   6   1   83.59   15.30
  12   6  -1   93.79   16.10
  11  -6  -1  159.28   21.70
 -11   6   1  133.79   19.40
  11   6  -1  194.58   19.70
  10  -6  -1   81.79   14.80
 -10   6   1   63.49   12.80
  10   6  -1   69.79   12.60
   9  -6  -1   32.60   12.30
   9   6  -1   32.70   10.30
   9   6  -1   34.20    9.70
  -9   6   1   31.10   10.80
   8  -6  -1 1969.90   55.59
   8   6  -1 2051.99   49.00
   8   6  -1 2057.59   50.39
  -8   6   1 2005.20   53.69
   7  -6  -1 2793.72   73.49
   7   6  -1 3060.89   67.09
  -7   6   1 3004.60   71.89
   7   6  -1 3004.80   68.19
   6  -6  -1  934.91   32.00
   6   6  -1  977.80   26.60
  -6   6   1 1038.00   30.80
   6   6  -1 1032.00   26.00
   5  -6  -1   21.70    9.00
   5  -6  -1   17.10   10.10
   5   6  -1    4.70    5.00
   5   6  -1   16.80    8.70
  -5   6   1   19.40    7.80
   5   6  -1    1.60    5.80
   4  -6  -1   10.50    8.00
  -4   6   1    5.90    7.00
  -4   6   1    0.50    9.50
   3  -6  -1   88.59   11.90
  -3   6   1   85.89   11.20
  -3   6   1   93.09   13.20
   2  -6  -1 9178.88  188.98
   2  -6  -1 8898.41  188.98
  -2   6   1 8439.16  188.98
  -2   6   1 8993.40  188.58
  -1  -6   1 1077.89   25.00
   1  -6  -1 1091.19   27.70
   1  -6  -1 1111.09   27.80
  -1   6   1 1102.19   28.30
  -1   6   1 1148.19   27.80
   0  -6  -1 5279.87  113.69
   0  -6   1 5333.97  113.69
   0   6   1 5374.76  113.79
   0   6   1 5393.36  114.59
   1  -6   1    6.90    5.30
  -1  -6  -1   11.90    5.80
   1  -6   1    6.20    7.20
  -1  -6  -1    9.00    4.80
   1   6   1   -4.40    5.00
  -1   6  -1   11.20    6.50
   1   6   1   10.70    6.20
   2  -6   1 1509.55   35.50
  -2  -6  -1 1414.96   34.00
   2  -6   1 1464.15   36.20
   2   6   1 1444.96   32.60
   2   6   1 1389.46   33.90
  -2   6  -1 1423.96   35.60
   3  -6   1   78.59    9.90
  -3  -6  -1   61.59    8.80
  -3   6  -1   63.29   10.80
   3   6   1   77.79   10.20
  -3   6  -1   57.59    8.10
  -4  -6  -1  450.55   16.20
   4  -6   1  484.85   20.00
   4   6   1  465.65   18.30
  -4   6  -1  445.46   18.10
   4   6   1  474.85   16.80
   5  -6   1 3513.55   78.89
  -5  -6  -1 3422.06   76.69
   5   6   1 3433.96   76.39
   5   6   1 3281.17   77.19
  -5   6  -1 3348.66   78.29
  -6  -6  -1 1404.96   37.50
  -6   6  -1 1493.65   39.70
   6   6   1 1421.06   38.50
   6   6   1 1455.25   37.40
   7  -6   1   40.60   11.20
  -7  -6  -1   34.70    9.30
  -7   6  -1   34.00    9.60
   7   6   1   34.90    9.70
   8  -6   1  368.56   22.20
  -8  -6  -1  357.76   18.30
  -8   6  -1  314.97   19.20
   9  -6   1   44.90   12.60
  -9  -6  -1   14.70   10.50
   9   6   1   47.30   12.80
  -9   6  -1   16.60   10.50
 -10  -6  -1  459.35   24.30
  10  -6   1  499.95   28.00
 -10   6  -1  487.85   25.50
  10   6   1  508.55   25.70
  11  -6   1  218.48   24.40
 -11  -6  -1  238.98   21.40
  11   6   1  242.78   23.00
 -11   6  -1  247.68   21.70
 -12  -6  -1 1229.28   43.20
  12  -6   1 1220.48   47.40
  12   6   1 1232.58   44.10
 -12   6  -1 1207.08   43.20
  13  -6   1   83.19   19.20
 -13   6  -1   54.89   16.30
  13   6   1   51.39   17.30
  14  -6   1   62.69   19.60
  14   6   1   62.79   18.60
 -14   6  -1   62.59   17.20
  15  -6   1   80.09   22.00
 -15   6  -1   65.09   19.60
  15   6   1   78.19   20.60
  16  -6   1   -5.40   20.30
  16   6   1  -13.70   18.20
 -16   6  -1   -6.90   18.10
  17  -6   1  184.08   29.10
  17   6   1  229.68   34.10
 -17   6  -1  224.98   33.70
  18  -6   1  293.67   38.50
 -18   6  -1  289.47   37.80
  19  -7  -1   -8.60   21.50
 -19   7   1   29.50   24.20
  18  -7  -1  127.59   26.70
 -18   7   1  107.29   25.90
  17  -7  -1  217.48   35.50
 -17   7   1  228.18   31.20
  16  -7  -1  505.35   40.10
 -16   7   1  524.05   36.40
  16   7  -1  509.65   34.80
  15  -7  -1   51.79   20.00
 -15   7   1   24.60   17.30
  15   7  -1   22.80   17.30
  14  -7  -1  308.37   30.70
  14   7  -1  241.98   25.50
 -14   7   1  224.48   26.10
  13  -7  -1   55.49   17.70
  13   7  -1   59.29   16.00
 -13   7   1   56.89   16.10
  12  -7  -1  -12.30   13.80
 -12   7   1    0.90   12.40
  12   7  -1   -2.00   12.90
  11  -7  -1  231.88   23.70
 -11   7   1  207.48   21.20
  11   7  -1  253.07   21.00
  10  -7  -1 2112.59   62.09
 -10   7   1 2179.18   59.59
  10   7  -1 2186.88   56.09
   9  -7  -1    8.70   11.40
   9   7  -1   -3.90    9.70
   9   7  -1   11.60    9.30
  -9   7   1   33.50   10.70
   8  -7  -1  540.15   25.60
   8   7  -1  511.15   18.90
   8   7  -1  514.65   20.40
  -8   7   1  542.15   23.60
   7  -7  -1   61.19   11.90
   7   7  -1   48.80    7.70
  -7   7   1   45.20    9.90
   7   7  -1   51.39    8.80
   6  -7  -1  433.26   20.80
  -6   7   1  381.76   18.50
   6   7  -1  361.36   14.20
   6   7  -1  354.56   13.30
  -5  -7   1  181.98    8.40
   5  -7  -1  173.98   15.20
   5   7  -1  193.48   14.90
  -5   7   1  204.58   14.30
   4  -7  -1 4017.40   92.69
  -4   7   1 4144.09   91.79
   3  -7  -1  459.05   18.30
  -3   7   1  449.36   16.90
  -3   7   1  454.35   20.30
   2  -7  -1 1931.01   44.60
   2  -7  -1 1866.91   44.40
  -2   7   1 1821.32   44.70
  -2   7   1 1789.92   44.10
   1  -7  -1  771.02   21.60
  -1  -7   1  756.02   18.50
   1  -7  -1  738.73   21.30
  -1   7   1  741.93   21.60
  -1   7   1  755.22   22.00
   0  -7  -1 1096.49   27.50
   0  -7   1 1145.99   27.30
   0   7   1 1111.39   28.50
   0   7  -1 1115.89   29.60
   0   7   1 1149.19   27.80
   1  -7   1  340.57   13.00
  -1  -7  -1  332.57   13.00
   1  -7   1  340.17   15.50
  -1  -7  -1  326.67   11.40
  -1   7  -1  354.86   15.10
   1   7   1  333.57   11.80
   2  -7   1 2768.32   61.69
  -2  -7  -1 2645.44   60.09
   2  -7   1 2748.23   62.39
   2   7   1 2666.23   59.99
  -2   7  -1 2677.63   61.89
   3  -7   1 1292.87   34.40
  -3  -7  -1 1260.07   31.50
   3   7   1 1278.77   31.40
  -3   7  -1 1296.97   33.80
  -4  -7  -1   84.49    9.90
   4  -7   1   96.79   13.60
  -4   7  -1   80.99   11.60
   4   7   1   87.29   10.10
   5  -7   1  490.55   23.40
  -5  -7  -1  456.85   17.10
   5   7   1  430.26   18.70
   5   7   1  472.25   17.10
  -5   7  -1  452.95   19.20
   6  -7   1  277.57   18.60
  -6  -7  -1  250.97   14.20
   6   7   1  269.97   14.60
  -6   7  -1  257.87   16.30
   6   7   1  260.67   16.20
  -7  -7  -1  801.62   26.10
   7  -7   1  834.32   30.60
  -7   7  -1  819.62   28.40
   7   7   1  827.32   26.20
   8  -7   1 2481.95   65.99
  -8  -7  -1 2442.96   60.79
  -8   7  -1 2443.46   62.99
   9  -7   1 1058.59   38.30
  -9  -7  -1 1063.29   33.90
   9   7   1 1067.19   34.70
  -9   7  -1  993.40   35.00
  10  -7   1   -4.10   12.00
 -10  -7  -1    4.90   11.00
 -10   7  -1   11.00   11.00
  10   7   1   18.60   12.60
 -11  -7  -1  132.09   19.30
  11  -7   1   93.39   17.50
  11   7   1   92.69   16.40
 -11   7  -1   98.19   15.50
 -12  -7  -1   33.10   13.90
  12  -7   1   -2.60   14.80
 -12   7  -1   24.30   13.70
  12   7   1   12.70   15.50
  13  -7   1  203.48   26.90
  13   7   1  232.48   25.60
 -13   7  -1  189.88   23.70
  14  -7   1  598.54   38.30
 -14   7  -1  662.63   35.90
  14   7   1  620.34   35.20
  15  -7   1  280.47   32.70
  15   7   1  269.27   30.40
 -15   7  -1  322.77   30.10
  16  -7   1    5.80   20.60
 -16   7  -1   18.60   19.20
  16   7   1   13.90   20.00
  17  -7   1   14.90   21.30
 -17   7  -1   32.60   20.80
  18  -7   1   26.30   22.90
 -18   7  -1   43.10   24.30
  19  -8  -1   14.80   23.30
 -19   8   1   -3.50   22.30
  18  -8  -1   35.20   22.40
 -18   8   1   12.60   22.10
  17  -8  -1  -26.80   19.80
 -17   8   1    7.70   20.70
  16  -8  -1   17.30   19.30
 -16   8   1   48.00   19.00
  16   8  -1   19.90   18.30
  15  -8  -1  306.97   33.30
  15   8  -1  310.67   28.50
 -15   8   1  332.67   30.20
  14  -8  -1  836.22   43.20
  14   8  -1  851.81   37.00
 -14   8   1  895.31   40.50
  13  -8  -1   50.69   17.40
  13   8  -1   70.29   15.60
 -13   8   1   54.99   16.20
  12  -8  -1  -24.20   13.20
  12   8  -1   -2.50   12.90
 -12   8   1   26.90   13.30
  11  -8  -1  755.02   34.90
  11   8  -1  736.93   29.20
 -11   8   1  785.22   32.70
  10  -8  -1  273.27   23.50
 -10   8   1  293.37   21.30
  10   8  -1  313.17   17.30
  10   8  -1  299.97   19.40
   9  -8  -1  422.26   25.00
   9   8  -1  435.46   19.80
  -9   8   1  457.65   23.10
   9   8  -1  449.56   19.70
   8  -8  -1 3504.75   87.49
  -8   8   1 3580.54   85.39
   8   8  -1 3526.05   78.79
   8   8  -1 3468.95   79.79
   7  -8  -1  216.78   18.30
  -7   8   1  220.18   16.80
   7   8  -1  207.58   12.40
   6  -8  -1 1589.64   44.50
  -6  -8   1 1556.54   36.60
   6   8  -1 1577.84   36.50
  -6   8   1 1566.44   42.60
   5  -8  -1   76.19   10.80
  -5   8   1   52.29    9.30
   4  -8  -1  227.18   15.60
  -4   8   1  239.88   19.40
  -4   8   1  256.17   14.50
   3  -8  -1  891.71   27.10
  -3   8   1  934.91   28.70
  -3   8   1  909.71   26.50
   2  -8  -1 2603.74   59.89
  -2   8   1 2540.25   59.69
  -2   8   1 2627.74   60.39
   1  -8  -1  635.64   19.90
   1  -8  -1  654.33   20.20
  -1   8   1  651.73   20.30
  -1   8   1  649.93   20.20
   0  -8  -1 1321.27   32.50
   0  -8   1 1359.56   32.40
   0   8   1 1399.66   33.00
   0   8   1 1385.76   34.10
   0   8  -1 1314.87   34.80
   1  -8   1  188.18   13.80
  -1  -8  -1  206.68    9.50
   1  -8   1  195.88   11.10
  -1  -8  -1  180.08   11.00
  -1   8  -1  193.08   12.70
   1   8   1  182.58   10.10
   2  -8   1    6.90    6.00
  -2  -8  -1    9.60    5.90
   2  -8   1   17.40    8.90
  -2   8  -1   14.70    7.00
   2   8   1    2.50    6.50
  -3  -8  -1 2090.19   48.70
   3  -8   1 2152.88   51.69
  -3   8  -1 2135.99   51.29
   3   8   1 2090.09   48.70
   4  -8   1  411.06   18.50
  -4  -8  -1  425.96   15.30
  -4   8  -1  420.66   18.10
   4   8   1  421.86   15.30
  -5  -8  -1 1045.40   28.40
  -5   8  -1 1059.29   31.20
   5   8   1 1012.80   30.30
   5   8   1 1058.89   28.50
  -6  -8  -1  638.24   21.20
   6  -8   1  562.74   25.30
  -6   8  -1  613.24   23.40
   6   8   1  639.44   26.10
   6   8   1  646.34   21.30
   7  -8   1    7.40   10.50
  -7  -8  -1   -9.60    7.60
   7   8   1    5.60    8.50
  -7   8  -1    4.40    8.80
   8  -8   1 1577.84   48.50
  -8  -8  -1 1643.14   43.50
  -8   8  -1 1589.14   45.80
   9  -8   1  452.15   25.90
  -9  -8  -1  423.56   21.00
  -9   8  -1  423.46   22.90
   9   8   1  395.66   22.20
 -10  -8  -1  -12.50   10.70
  10  -8   1   15.50   12.80
  10   8   1    9.50   12.90
 -10   8  -1    9.80   11.30
 -11  -8  -1   44.60   13.50
  11  -8   1   44.40   15.50
 -11   8  -1   45.30   13.70
  11   8   1   23.80   14.80
  12  -8   1  779.22   39.00
 -12  -8  -1  806.92   33.60
 -12   8  -1  732.03   34.40
  12   8   1  757.22   34.10
  13  -8   1   65.89   18.90
  13   8   1   39.40   16.90
 -13   8  -1   41.10   15.70
  14  -8   1  191.68   25.70
  14   8   1  163.68   27.60
 -14   8  -1  184.28   25.60
  15  -8   1  183.28   30.80
  15   8   1  186.98   28.40
 -15   8  -1  172.98   27.50
  16  -8   1  300.07   37.00
 -16   8  -1  301.47   33.80
  16   8   1  211.58   31.80
  17  -8   1   16.00   21.60
 -17   8  -1   21.90   20.20
  18  -8   1  266.27   38.80
 -18   8  -1  294.07   37.50
  19  -9  -1  -59.59   19.80
 -19   9   1    9.30   22.80
  18  -9  -1   32.30   23.40
 -18   9   1   77.59   24.70
  17  -9  -1  -23.60   19.40
 -17   9   1  -32.70   18.40
  16  -9  -1  363.06   36.80
 -16   9   1  392.46   34.00
  15  -9  -1  119.29   23.60
  15   9  -1   76.89   18.50
 -15   9   1  117.19   21.00
  14  -9  -1    9.30   16.30
  14   9  -1   10.60   15.30
 -14   9   1    7.80   15.20
  13  -9  -1   25.70   16.50
  13   9  -1  -12.10   13.40
 -13   9   1   -7.60   13.50
  12  -9  -1  294.77   27.70
 -12   9   1  333.67   25.60
  12   9  -1  313.17   22.90
  11  -9  -1   26.30   14.50
  11   9  -1   26.70   12.40
 -11   9   1   54.49   13.50
  10  -9  -1  539.75   29.00
  10   9  -1  558.44   23.10
 -10   9   1  531.75   26.40
  10   9  -1  534.05   21.10
   9  -9  -1   26.90   12.10
   9   9  -1    8.80    9.30
  -9   9   1   15.30   10.30
   9   9  -1   20.30    8.40
   8  -9  -1   39.30   11.80
   8   9  -1   19.60    8.80
   8   9  -1   24.50    7.50
  -8   9   1   31.50   10.10
   7  -9  -1  289.17   19.80
   7   9  -1  285.27   12.70
  -7   9   1  259.87   18.00
   6  -9  -1  214.38   17.40
  -6   9   1  154.48   14.50
   5  -9  -1   89.99   14.00
  -5   9   1  101.69   12.70
   4  -9  -1  165.48   14.60
  -4   9   1  140.19   13.30
  -4   9   1  174.88   17.30
   3  -9  -1  160.28   13.10
  -3   9   1  146.69   16.10
  -3   9   1  138.89   12.70
   2  -9  -1  929.61   26.70
  -2   9   1  936.41   28.10
  -2   9   1  939.61   26.70
   1  -9  -1  875.91   24.40
   1  -9  -1  865.31   25.00
  -1   9   1  846.42   25.20
  -1   9   1  932.91   26.40
   0  -9  -1  203.48   10.90
   0   9   1  188.78   12.20
   0   9   1  196.48   13.10
   0   9  -1  194.78   13.30
   1  -9   1  250.27   16.20
  -1  -9  -1  249.58   12.30
   1  -9   1  222.58   12.10
  -1  -9  -1  262.17   10.80
  -1   9  -1  251.07   14.30
   1   9   1  239.08   11.70
   2  -9   1 1189.28   32.20
   2  -9   1 1097.39   30.20
  -2  -9  -1 1158.18   29.40
  -2   9  -1 1191.68   32.00
   2   9   1 1156.58   29.30
  -3  -9  -1   84.99    9.60
   3  -9   1  101.19   14.00
   3  -9   1  102.09   10.40
   3   9   1  113.09   10.30
  -3   9  -1  115.99   12.00
  -4  -9  -1  100.69   10.30
  -4   9  -1  103.69   12.60
   4   9   1  132.99   11.00
   5  -9   1  484.35   22.10
  -5  -9  -1  448.56   17.00
   5   9   1  460.55   16.90
  -5   9  -1  445.16   19.80
   6  -9   1  139.39   16.70
  -6  -9  -1  142.09   12.30
   6   9   1  146.69   13.40
  -6   9  -1  151.48   14.90
  -7  -9  -1  566.04   20.60
   7  -9   1  495.75   25.20
   7   9   1  557.94   21.00
  -7   9  -1  526.55   23.20
  -8  -9  -1 1340.47   38.30
   8  -9   1 1386.86   44.30
  -8   9  -1 1401.76   41.80
   8   9   1 1363.86   38.40
  -9  -9  -1   74.09   12.30
   9  -9   1  110.89   16.40
   9   9   1  103.89   13.90
  -9   9  -1  113.49   16.90
  10  -9   1   51.79   14.70
 -10  -9  -1    7.30   11.40
 -10   9  -1   35.90   12.50
  10   9   1   41.70   13.70
 -11  -9  -1   33.90   13.10
  11  -9   1   36.00   15.40
 -11   9  -1   29.10   12.80
  11   9   1   23.90   15.00
  12  -9   1  288.97   28.70
 -12  -9  -1  323.97   24.10
 -12   9  -1  299.97   26.00
  12   9   1  344.67   25.90
  13  -9   1  170.28   23.40
  13   9   1  150.48   23.90
 -13   9  -1  156.98   23.90
  14  -9   1  171.88   24.30
 -14   9  -1  154.48   25.50
  14   9   1  112.29   20.40
  15  -9   1   27.20   20.00
  15   9   1    8.50   17.90
 -15   9  -1   -9.50   17.00
  16  -9   1   37.10   21.80
 -16   9  -1   -8.60   18.50
  17  -9   1  162.58   28.00
 -17   9  -1  168.38   26.50
  18  -9   1   64.09   25.20
 -18   9  -1  129.29   26.30
 -19  10   1  -17.50   21.70
  18 -10  -1   29.90   23.10
 -18  10   1   33.40   23.80
  17 -10  -1   28.10   22.80
 -17  10   1   -1.10   18.80
  16 -10  -1   53.29   21.10
 -16  10   1   60.39   20.20
  15 -10  -1  -32.60   16.50
 -15  10   1   -0.50   16.40
  15  10  -1  -15.10   17.40
  14 -10  -1    4.50   17.10
  14  10  -1    7.00   15.00
 -14  10   1    3.60   14.80
  13 -10  -1  415.96   32.10
 -13  10   1  381.86   28.60
  13  10  -1  411.36   25.80
  12 -10  -1  377.16   29.30
 -12  10   1  373.06   26.40
  12  10  -1  349.87   23.00
  11 -10  -1  229.88   24.20
  11  10  -1  251.57   19.70
 -11  10   1  266.57   22.60
  10 -10  -1  124.29   17.30
  10  10  -1  117.09   15.70
  10  10  -1  122.59   14.00
 -10  10   1  117.89   17.60
   9 -10  -1   10.90   11.60
  -9  10   1   -1.20    9.40
   9  10  -1    5.00    9.00
   9  10  -1   -0.30    7.80
   8 -10  -1  293.17   21.10
  -8  10   1  285.47   19.50
   8  10  -1  279.87   14.40
  -7 -10   1  210.58   10.50
   7 -10  -1  200.68   18.30
   7  10  -1  208.28   11.30
  -7  10   1  168.58   16.20
   6 -10  -1  148.89   16.50
  -6  10   1  173.08   15.30
   5 -10  -1   30.90   10.10
  -5  10   1   21.00    8.50
   4 -10  -1   94.59   11.40
  -4  10   1  101.49   13.50
  -4  10   1   75.49    9.80
   3 -10  -1 1079.99   31.00
  -3  10   1 1099.99   32.70
  -3  10   1 1064.39   30.80
   2 -10  -1   29.80    7.60
  -2  10   1   23.00    7.60
  -2  10   1   36.70   10.90
   1 -10  -1   -1.90    6.60
   1 -10  -1   -3.60    5.70
  -1  10   1    2.70    6.80
  -1  10   1    9.40    8.30
   0 -10  -1 1019.00   26.30
   0  10  -1 1028.80   29.40
   0  10   1  973.50   28.00
   0  10   1 1012.70   26.80
  -1 -10  -1   85.59   10.10
  -1 -10  -1   80.39    8.40
   1 -10   1   76.29    9.60
  -1  10  -1   92.09   11.50
   1  10   1   69.69   10.40
  -2 -10  -1  788.12   22.60
   2 -10   1  805.22   26.40
  -2  10  -1  805.62   25.40
   3 -10   1   29.90    7.30
  -3 -10  -1   17.30    6.60
   3 -10   1   44.90    9.80
  -3  10  -1   25.90    8.00
   3  10   1   21.20    6.80
  -4 -10  -1   22.40    7.00
   4 -10   1   26.80    9.40
   4  10   1   28.60    7.30
  -4  10  -1   30.50    8.60
   5 -10   1 1022.80   32.90
  -5 -10  -1  988.10   27.60
  -5  10  -1  995.90   31.00
   5  10   1  996.50   27.50
   6 -10   1   27.10   10.70
  -6 -10  -1   42.70    8.30
   6  10   1   23.10    7.90
  -6  10  -1   25.20    9.10
   7 -10   1   -1.00   10.00
  -7 -10  -1   -9.10    7.90
  -7  10  -1   -0.10    8.70
   7  10   1    2.80    8.20
  -8 -10  -1   56.49   10.40
   8 -10   1   53.99   13.40
  -8  10  -1   62.29   11.90
   8  10   1   47.30   12.20
   8  10   1   51.49   11.20
   9 -10   1   -7.30   11.20
  -9 -10  -1   -6.80    9.70
   9  10   1   14.90   11.60
  -9  10  -1  -19.20    9.80
 -10 -10  -1  810.52   30.70
  10 -10   1  807.92   36.50
 -10  10  -1  857.11   33.50
  10  10   1  899.41   31.70
 -11 -10  -1   65.29   13.80
  11 -10   1   50.19   16.80
  11  10   1   46.10   15.30
 -11  10  -1   53.19   14.50
  12 -10   1  291.47   28.20
 -12 -10  -1  320.97   23.90
 -12  10  -1  291.07   24.90
  12  10   1  325.17   25.50
  13 -10   1   55.69   18.70
  13  10   1   81.69   18.20
 -13  10  -1   81.99   17.60
  14 -10   1   17.70   18.00
  14  10   1    4.60   16.90
 -14  10  -1   62.09   18.10
  15 -10   1   31.80   20.00
 -15  10  -1   40.50   18.80
  16 -10   1   43.20   23.60
 -16  10  -1   32.40   20.60
  17 -10   1   32.50   22.40
 -17  10  -1   38.40   20.70
  18 -10   1   25.00   23.60
 -18  10  -1   50.99   24.30
  18 -11  -1   12.80   22.20
 -18  11   1   18.90   22.20
  17 -11  -1  144.69   28.20
 -17  11   1  155.48   26.10
  16 -11  -1  115.89   25.40
 -16  11   1  108.89   23.30
  15 -11  -1   -5.90   17.30
 -15  11   1   32.60   17.80
  14 -11  -1   36.10   18.30
  14  11  -1   19.80   15.20
 -14  11   1   -5.30   15.30
  13 -11  -1  359.56   31.20
  13  11  -1  351.76   25.00
 -13  11   1  309.27   27.20
  12 -11  -1  320.87   28.20
  12  11  -1  302.27   22.20
 -12  11   1  351.06   25.90
  11 -11  -1  133.09   22.50
  11  11  -1  151.28   17.10
  11  11  -1  127.69   17.70
 -11  11   1  144.59   19.90
  10 -11  -1 1081.99   40.20
  10  11  -1  970.80   29.50
 -10  11   1 1016.60   37.20
   9 -11  -1   15.50   12.00
   9  11  -1   32.70    8.30
  -9  11   1   24.10   11.30
   8 -11  -1  857.71   33.60
   8  11  -1  875.31   24.90
  -8  11   1  881.91   31.80
   7 -11  -1   66.29   12.60
  -7  11   1   61.09   11.00
   6 -11  -1   57.29   11.60
  -6  11   1   54.59   10.30
   5 -11  -1   96.79   12.40
  -5  11   1  100.99   13.50
   4 -11  -1 1371.66   38.80
  -4  11   1 1372.16   37.80
   3 -11  -1  117.09   13.30
  -3  11   1   98.49   16.00
  -3  11   1   93.59   12.20
   2 -11  -1  106.79   12.00
   2 -11  -1  106.49   11.40
  -2  11   1  132.39   12.30
  -2  11   1  106.09   15.00
   1 -11  -1   12.70    7.00
   1 -11  -1    3.70    6.30
  -1 -11   1   14.40    6.00
  -1  11   1   11.50    7.30
  -1  11   1    4.90    8.70
   0 -11   1   66.39    9.80
   0 -11  -1   74.29    9.70
   0  11   1   81.39   11.80
   0  11  -1   85.19   12.50
   0  11   1   84.99   12.30
  -1 -11  -1   20.70    6.00
  -1 -11  -1   19.20    6.70
   1 -11   1   24.20    6.40
  -1  11  -1   26.30    8.40
   1  11   1   24.20    7.00
  -2 -11  -1 1265.07   33.10
   2 -11   1 1318.07   35.70
   2 -11   1 1453.25   40.50
  -2  11  -1 1232.68   35.80
   3 -11   1  824.32   27.30
   3 -11   1  887.41   29.50
  -3 -11  -1  831.12   23.70
  -3  11  -1  827.72   26.90
   3  11   1  831.92   23.80
   4 -11   1 2158.58   52.69
  -4 -11  -1 1955.60   47.10
   4  11   1 1924.51   46.90
  -4  11  -1 1931.81   50.79
  -5 -11  -1   17.20    7.40
   5 -11   1    7.30    9.50
   5  11   1   16.50    7.60
  -5  11  -1   27.70    8.80
  -6 -11  -1  135.59   12.20
   6 -11   1  144.49   16.90
   6  11   1  150.28   13.00
  -6  11  -1  129.79   14.90
  -7 -11  -1   80.99   12.20
   7 -11   1   99.49   14.20
   7  11   1  114.29   13.60
  -7  11  -1   68.49   11.80
  -8 -11  -1  104.29   13.90
   8 -11   1  108.39   18.30
  -8  11  -1   89.79   13.10
   8  11   1  151.18   15.40
   8  11   1  115.59   14.90
   9 -11   1 1016.20   38.50
  -9 -11  -1  944.51   31.50
  -9  11  -1  922.91   35.30
   9  11   1  994.30   32.40
 -10 -11  -1   10.10   11.10
  10 -11   1    5.80   13.80
 -10  11  -1    3.60   11.50
  10  11   1   -0.80   12.80
 -11 -11  -1  239.88   20.60
  11 -11   1  189.98   24.90
 -11  11  -1  255.47   22.50
  11  11   1  226.98   21.90
 -12 -11  -1   91.89   15.80
  12 -11   1  159.68   22.40
  12  11   1   81.09   16.20
 -12  11  -1  119.89   17.80
  13 -11   1   77.39   19.70
 -13 -11  -1  114.89   18.20
 -13  11  -1   84.39   18.20
  13  11   1   94.69   18.20
  14 -11   1  109.99   22.40
  14  11   1   97.09   24.70
 -14  11  -1   54.69   18.10
  15 -11   1   57.39   22.00
 -15  11  -1   41.40   18.50
  16 -11   1   -6.80   20.00
 -16  11  -1   30.10   19.60
  17 -11   1   76.89   24.90
 -17  11  -1   33.10   21.10
  18 -11   1   -3.00   21.40
 -18  11  -1   53.39   22.70
  18 -12  -1   40.60   23.90
 -18  12   1  -15.20   20.80
  17 -12  -1  104.69   27.20
 -17  12   1  159.68   26.30
  16 -12  -1   68.79   23.60
 -16  12   1   57.79   20.80
  15 -12  -1  173.38   25.90
 -15  12   1  178.28   27.60
  14 -12  -1  553.74   38.20
 -14  12   1  643.94   35.30
  13 -12  -1  149.39   22.70
  13  12  -1   85.99   15.60
 -13  12   1  104.49   18.60
  12 -12  -1   23.60   15.80
  12  12  -1   10.20   12.40
 -12  12   1   18.10   13.60
  11 -12  -1   40.50   15.40
 -11  12   1   46.40   13.60
  10 -12  -1   60.79   15.30
  10  12  -1   50.99    9.50
 -10  12   1   52.29   13.10
   9 -12  -1  176.78   20.20
   9  12  -1  148.49   12.60
  -9  12   1  154.48   18.50
   8 -12  -1 1420.96   46.20
  -8  12   1 1507.85   44.40
   7 -12  -1 1620.74   47.60
  -7  12   1 1553.34   45.30
   6 -12  -1  223.48   18.30
  -6  12   1  213.58   17.00
   5 -12  -1   36.70   10.40
  -5  12   1   12.80    8.60
   4 -12  -1  245.78   16.70
  -4  12   1  214.68   15.40
   3 -12  -1 1536.95   41.30
  -3  12   1 1584.54   43.00
  -3  12   1 1546.35   41.60
   2 -12  -1  237.68   14.30
   2 -12  -1  275.67   21.70
  -2  12   1  237.78   17.10
  -2  12   1  219.58   14.90
  -1 -12   1   79.99    9.20
   1 -12  -1   67.29   11.00
   1 -12  -1   49.80    8.70
  -1  12   1   74.19   10.70
  -1  12   1   66.39    9.30
   0 -12   1   38.90    7.80
   0 -12  -1   29.10    7.20
   0  12  -1   40.90    8.90
   0  12   1   34.10    8.00
   0  12   1   28.80    8.30
  -1 -12  -1  123.99   11.00
  -1 -12  -1   95.19    9.30
   1 -12   1  108.09   11.90
   1  12   1   93.09   10.90
  -1  12  -1  124.49   13.00
   1  12   1   81.89   12.60
   2 -12   1 1549.05   40.90
  -2 -12  -1 1540.55   38.50
   2 -12   1 1530.35   39.80
  -2  12  -1 1577.24   41.80
   3 -12   1   83.39   11.20
  -3 -12  -1   54.69    8.10
  -3  12  -1   64.59   10.10
  -4 -12  -1  116.09   11.00
   4 -12   1   97.79   14.50
  -4  12  -1  104.89   13.70
   4  12   1   99.99   11.30
   5 -12   1 1298.07   38.90
  -5 -12  -1 1238.98   33.00
   5  12   1 1231.68   32.80
  -5  12  -1 1250.17   37.10
  -6 -12  -1 1020.30   28.70
   6 -12   1  956.40   34.30
   6  12   1 1019.30   28.60
  -6  12  -1  970.70   32.50
  -7 -12  -1   72.59   12.20
   7 -12   1   71.49   13.40
  -7  12  -1   78.19   12.10
   7  12   1   69.99   11.80
   8 -12   1  670.93   30.80
  -8 -12  -1  705.93   24.90
  -8  12  -1  651.83   28.10
   8  12   1  678.73   24.40
  -9 -12  -1  466.65   21.90
   9 -12   1  493.15   27.90
  -9  12  -1  490.35   25.70
 -10 -12  -1    6.30   11.20
  10 -12   1   20.00   13.90
 -10  12  -1   12.80   12.00
  10  12   1   11.80   12.50
  11 -12   1  205.58   26.30
 -11 -12  -1  292.57   21.20
  11  12   1  260.57   21.60
 -11  12  -1  339.17   25.40
  12 -12   1  283.87   28.80
 -12 -12  -1  295.07   22.90
  12  12   1  351.16   25.30
 -12  12  -1  316.77   26.70
  13 -12   1   21.90   17.20
 -13 -12  -1    5.10   14.20
  13  12   1   23.20   16.20
 -13  12  -1   12.80   14.60
  14 -12   1  250.37   30.90
 -14  12  -1  166.78   26.60
  15 -12   1  239.58   35.60
 -15  12  -1  272.47   30.70
  16 -12   1  -21.90   19.70
 -16  12  -1   15.10   19.20
  17 -12   1   24.10   23.20
 -17  12  -1   14.90   21.00
  18 -13  -1  147.99   28.30
 -18  13   1  118.09   27.10
  17 -13  -1    2.10   21.80
 -17  13   1   14.00   20.70
  16 -13  -1 1168.48   56.29
 -16  13   1 1193.48   51.99
  15 -13  -1   45.20   20.70
 -15  13   1   69.89   20.10
  14 -13  -1   38.00   18.50
 -14  13   1    3.80   16.10
  13 -13  -1   23.60   17.20
 -13  13   1  -11.20   13.70
  12 -13  -1  530.85   33.40
 -12  13   1  502.25   30.10
  11 -13  -1   79.29   17.60
 -11  13   1   79.99   15.30
  10 -13  -1  991.20   40.40
  10  13  -1 1064.09   29.50
 -10  13   1 1077.19   38.90
   9 -13  -1  145.99   18.70
   9  13  -1  131.59   12.00
  -9  13   1  130.99   18.30
   8 -13  -1   23.60   11.70
  -8  13   1   -0.20    9.50
   7 -13  -1  187.88   18.60
  -7  13   1  188.08   17.40
   6 -13  -1  740.43   28.90
  -6  13   1  713.33   27.00
   5 -13  -1  672.43   26.70
  -5  13   1  707.43   26.00
   4 -13  -1 2548.25   63.19
  -4  13   1 2495.15   62.59
   3 -13  -1  539.85   21.40
  -3  13   1  531.25   25.50
  -3  13   1  535.75   21.50
   2 -13  -1   20.50    8.20
  -2  13   1   33.20    8.80
  -2  13   1   34.90   11.90
  -1 -13   1   36.70    6.70
   1 -13  -1   37.40    8.20
  -1  13   1   28.80   10.30
  -1  13   1   46.90    9.00
   0 -13  -1  871.21   25.10
   0 -13   1  881.01   25.50
   0  13   1  882.21   27.70
   0  13  -1  896.21   28.70
   0  13   1  941.41   26.90
  -1 -13  -1  113.79   11.70
  -1 -13  -1  114.59    9.90
   1 -13   1  119.89   12.80
   1  13   1  112.59   13.10
   1  13   1  120.69   12.20
  -1  13  -1  125.99   14.00
  -2 -13  -1 1660.73   41.30
   2 -13   1 1657.13   43.80
   2 -13   1 1702.83   43.10
  -2  13  -1 1675.03   44.70
   3 -13   1  197.38   15.80
  -3 -13  -1  223.88   13.00
  -3  13  -1  217.18   15.90
  -4 -13  -1   78.79   10.80
   4 -13   1   90.39   12.30
   4  13   1   70.99   11.90
  -4  13  -1   79.79   13.00
  -5 -13  -1   68.79   11.20
   5 -13   1   76.89   12.30
  -5  13  -1   68.59   10.90
   5  13   1   71.89   11.60
  -6 -13  -1  427.66   17.50
   6 -13   1  420.96   23.40
  -6  13  -1  395.66   21.10
   6  13   1  434.16   18.00
   7 -13   1  160.48   19.30
  -7 -13  -1  180.88   14.10
   7  13   1  205.38   15.30
  -7  13  -1  215.18   18.20
   8 -13   1 2127.99   63.79
  -8 -13  -1 2405.96   57.29
  -8  13  -1 2241.08   61.59
   8  13   1 2280.67   55.89
   9 -13   1  208.38   22.70
  -9 -13  -1  232.58   16.90
  -9  13  -1  205.08   20.20
 -10 -13  -1    0.70   11.00
  10 -13   1  -10.60   13.30
 -10  13  -1   12.40   12.70
 -11 -13  -1  312.97   21.90
  11 -13   1  341.27   28.30
 -11  13  -1  336.47   26.20
  11  13   1  314.77   22.40
  12 -13   1  161.38   25.60
 -12 -13  -1  139.99   19.60
  12  13   1   97.89   16.50
 -12  13  -1  113.39   17.60
  13 -13   1  118.39   22.70
 -13 -13  -1  155.98   21.70
 -13  13  -1  144.19   23.70
  14 -13   1  561.74   40.00
 -14  13  -1  593.64   36.20
  15 -13   1  482.95   42.10
 -15  13  -1  485.15   35.40
  16 -13   1    5.90   20.40
 -16  13  -1  -14.20   17.70
  17 -13   1   71.99   25.30
 -17  13  -1  122.39   25.80
  18 -14  -1   67.59   25.70
 -18  14   1   60.89   23.60
  17 -14  -1  115.99   27.80
 -17  14   1  212.38   32.90
  16 -14  -1  397.06   38.20
 -16  14   1  293.27   33.10
  15 -14  -1  -10.50   17.40
 -15  14   1  -15.60   15.90
  14 -14  -1  973.10   47.90
 -14  14   1  963.50   43.90
  13 -14  -1   -2.30   15.80
 -13  14   1   10.30   15.10
  12 -14  -1  417.96   31.00
 -12  14   1  424.06   28.70
  11 -14  -1  187.78   24.20
 -11  14   1  190.88   22.30
  10 -14  -1  530.65   30.60
 -10  14   1  580.44   29.20
  10  14  -1  538.15   26.50
   9 -14  -1   26.40   13.50
  -9  14   1    4.00   10.70
   8 -14  -1 2711.33   72.59
  -8  14   1 2651.23   70.39
   7 -14  -1    4.60   10.90
  -7  14   1   -6.30    9.00
   6 -14  -1  827.32   30.60
  -6  14   1  744.73   28.80
   5 -14  -1  328.17   20.00
  -5  14   1  352.56   19.10
   4 -14  -1  319.67   18.20
  -4  14   1  265.37   17.50
   3 -14  -1  221.48   15.70
  -3  14   1  207.08   15.80
   2 -14  -1 3384.96   80.59
  -2  14   1 3480.05   82.29
  -2  14   1 3609.34   81.99
  -1 -14   1   -2.70    6.10
   1 -14  -1    9.40    7.30
  -1  14   1    2.40    8.00
  -1  14   1   11.60   10.30
   0 -14   1 2014.50   49.40
   0 -14  -1 2086.99   49.30
   0  14   1 2107.19   52.39
   0  14   1 2089.69   50.19
   0  14  -1 2022.50   53.19
   1 -14   1   43.20    8.90
  -1 -14  -1   45.10    8.30
  -1 -14  -1   31.90    6.90
   1  14   1   37.80    9.10
   1  14   1   48.70    8.70
  -1  14  -1   35.90    9.50
   2 -14   1  200.48   15.00
  -2 -14  -1  150.88   12.20
  -2  14  -1  196.58   15.70
   3 -14   1   40.50   10.20
  -3 -14  -1   42.20    8.10
  -3  14  -1   37.60    9.70
   4 -14   1 3259.77   80.09
  -4 -14  -1 3283.87   74.69
  -4  14  -1 3304.57   79.79
  -5 -14  -1   -7.90    7.50
   5 -14   1    8.50   10.00
   5  14   1    6.50    7.80
  -5  14  -1    6.80    8.80
   6 -14   1 1461.55   45.10
  -6 -14  -1 1486.65   38.10
   6  14   1 1424.96   38.40
  -6  14  -1 1392.06   42.70
  -7 -14  -1  426.66   18.60
   7 -14   1  462.15   25.40
  -7  14  -1  419.26   23.00
   7  14   1  405.36   18.80
  -8 -14  -1  179.08   15.50
   8 -14   1  165.98   20.70
  -8  14  -1  141.79   18.40
   8  14   1  155.28   15.00
   9 -14   1  531.35   30.40
  -9 -14  -1  507.75   22.20
  -9  14  -1  499.95   26.70
  10 -14   1 1192.38   47.30
 -10 -14  -1 1288.67   39.20
 -10  14  -1 1310.07   44.50
  11 -14   1   -7.60   13.80
 -11 -14  -1   15.00   12.10
 -11  14  -1   14.60   13.30
 -12 -14  -1  309.07   23.10
  12 -14   1  322.57   30.20
 -12  14  -1  314.77   26.70
  13 -14   1  494.45   36.70
 -13 -14  -1  474.95   27.90
 -13  14  -1  448.96   31.70
  14 -14   1  143.49   26.40
 -14  14  -1   82.99   19.60
  15 -14   1  231.18   35.40
 -15  14  -1  189.78   29.80
  16 -14   1  266.77   36.60
 -16  14  -1  226.88   32.00
  17 -14   1  147.79   28.20
 -17  14  -1   80.49   22.90
  18 -15  -1  624.14   47.40
 -18  15   1  659.13   45.30
  17 -15  -1   26.60   22.00
 -17  15   1   73.99   22.80
  16 -15  -1  281.47   37.10
 -16  15   1  255.87   32.50
  15 -15  -1   73.79   21.00
 -15  15   1   11.30   18.20
  14 -15  -1  -13.60   16.60
 -14  15   1   17.10   16.00
  13 -15  -1  297.87   30.60
 -13  15   1  262.47   27.10
  12 -15  -1 1395.56   51.79
 -12  15   1 1284.67   48.40
  11 -15  -1  105.69   18.70
 -11  15   1   70.39   15.70
  10 -15  -1  192.98   23.50
 -10  15   1  241.48   22.10
   9 -15  -1    6.10   12.50
  -9  15   1   20.00   11.50
   8 -15  -1  433.86   25.80
  -8  15   1  388.16   23.50
   7 -15  -1   19.60   11.30
  -7  15   1   -8.40    9.30
   6 -15  -1 2679.03   68.99
  -6  15   1 2582.64   67.69
   5 -15  -1  947.21   33.90
  -5  15   1 1114.09   34.60
   4 -15  -1  821.72   28.90
  -4  15   1  819.02   29.00
  -3 -15   1  483.65   15.60
   3 -15  -1  495.35   21.20
  -3  15   1  502.15   21.80
   2 -15  -1  638.44   23.30
  -2  15   1  690.63   26.90
  -2  15   1  691.53   25.30
   1 -15  -1  315.17   16.10
  -1 -15   1  313.37   14.20
   1  15  -1  331.87   18.60
  -1  15   1  335.57   18.20
  -1  15   1  355.16   19.30
   0 -15   1 1426.56   37.40
   0 -15  -1 1437.16   37.00
   0  15  -1 1456.45   41.00
   0  15   1 1461.65   38.30
   0  15   1 1444.86   40.30
   1 -15   1  250.47   15.00
  -1 -15  -1  255.77   14.80
  -1 -15  -1  265.97   12.80
   1  15   1  255.67   16.50
  -1  15  -1  230.78   17.20
   1  15   1  271.57   15.60
   2 -15   1  708.73   25.10
  -2 -15  -1  708.63   22.60
  -2  15  -1  683.63   26.20
  -3 -15  -1   33.40    8.10
   3 -15   1   40.70   10.20
  -3  15  -1   44.50   10.40
   4 -15   1  642.14   26.00
  -4 -15  -1  579.54   20.80
  -4  15  -1  633.44   25.40
  -5 -15  -1  287.07   15.10
   5 -15   1  282.57   20.20
  -5  15  -1  331.37   19.80
  -6 -15  -1 1510.15   38.40
   6 -15   1 1403.26   45.10
   6  15   1 1426.56   37.90
  -6  15  -1 1429.76   43.50
   7 -15   1  315.87   22.90
  -7 -15  -1  328.47   16.80
   7  15   1  288.27   16.60
  -7  15  -1  320.77   21.00
  -8 -15  -1  785.62   26.50
   8 -15   1  756.42   33.60
   8  15   1  722.13   25.40
  -8  15  -1  758.72   31.50
  -9 -15  -1    1.60   10.10
   9 -15   1   50.49   15.00
  -9  15  -1   17.30   12.30
  10 -15   1  311.37   27.50
 -10 -15  -1  319.97   20.40
 -10  15  -1  274.37   24.40
 -11 -15  -1  389.46   22.70
  11 -15   1  344.47   29.80
 -11  15  -1  363.96   27.00
  12 -15   1  303.77   30.10
 -12 -15  -1  338.57   23.70
 -12  15  -1  364.66   27.90
  13 -15   1  132.19   23.20
 -13  15  -1  153.08   24.30
  14 -15   1  180.98   27.50
 -14  15  -1  121.19   21.50
  15 -15   1  163.58   28.90
 -15  15  -1  136.89   23.40
  16 -15   1   73.99   25.20
 -16  15  -1   46.80   20.70
  17 -15   1  424.76   41.70
 -17  15  -1  377.36   37.40
  17 -16  -1  189.98   29.90
 -17  16   1  172.68   27.60
  16 -16  -1  345.57   38.90
 -16  16   1  365.86   34.60
  15 -16  -1  843.12   47.40
 -15  16   1  822.02   44.20
  14 -16  -1   38.90   19.80
 -14  16   1   81.89   19.40
  13 -16  -1  129.49   22.00
 -13  16   1   68.19   17.70
  12 -16  -1  153.48   22.60
 -12  16   1  119.09   19.30
  11 -16  -1  369.86   28.90
 -11  16   1  270.67   25.10
  10 -16  -1  290.07   26.00
 -10  16   1  267.77   23.90
   9 -16  -1  722.33   33.90
  -9  16   1  723.83   31.90
   8 -16  -1  264.47   23.00
  -8  16   1  308.47   22.00
   7 -16  -1   10.10   10.90
  -7  16   1   10.80   10.10
   6 -16  -1  779.72   30.20
  -6  16   1  684.03   28.60
   5 -16  -1  838.92   31.40
  -5  16   1  940.91   32.00
  -4  16   1  519.15   23.20
  -3 -16   1 1405.76   35.50
   3 -16  -1 1507.75   41.80
  -3  16   1 1525.65   42.70
   2 -16  -1 1580.64   42.70
  -2  16   1 1570.74   44.60
  -2  16   1 1653.43   49.60
  -1 -16   1   46.80    7.80
   1 -16  -1   44.90    9.20
   1  16  -1   52.39   10.70
  -1  16   1   42.70   10.20
  -1  16   1   60.79   13.00
   0 -16  -1   10.60    7.60
   0 -16   1    3.10    7.20
   0  16   1   13.20   10.70
   0  16  -1   -4.30    8.40
   0  16   1   -2.20    8.50
  -1 -16  -1 1431.46   34.80
  -1 -16  -1 1328.77   37.00
   1 -16   1 1349.56   37.70
   1  16   1 1403.36   36.20
  -1  16  -1 1360.86   40.80
   1  16   1 1351.36   39.30
  -2 -16  -1  559.64   20.20
   2 -16   1  485.85   21.90
  -2  16  -1  555.94   23.70
   3 -16   1  594.84   24.20
  -3 -16  -1  590.94   20.70
  -3  16  -1  564.74   24.70
  -4 -16  -1 1364.76   36.90
   4 -16   1 1433.06   42.20
  -4  16  -1 1405.96   42.40
   5 -16   1  509.05   25.10
  -5 -16  -1  504.25   19.40
  -5  16  -1  479.15   23.90
  -6 -16  -1  317.57   16.20
   6 -16   1  300.87   22.00
   6  16   1  286.07   16.50
  -6  16  -1  334.97   20.70
   7 -16   1 1147.09   41.10
  -7 -16  -1 1166.68   32.90
   7  16   1 1095.69   32.50
  -7  16  -1 1195.18   39.40
  -8 -16  -1   93.09   14.30
   8 -16   1   92.09   17.40
  -8  16  -1   92.29   14.80
   8  16   1   76.99   11.30
  -9 -16  -1  497.55   22.20
   9 -16   1  539.45   30.80
  -9  16  -1  490.25   27.80
  10 -16   1  551.84   32.60
 -10 -16  -1  578.24   24.80
 -10  16  -1  533.75   29.80
  11 -16   1   24.50   16.10
 -11 -16  -1   17.80   12.40
 -11  16  -1    3.80   13.40
 -12 -16  -1   16.10   13.80
  12 -16   1   -4.40   15.90
 -12  16  -1   -5.80   14.30
  13 -16   1  501.25   37.00
 -13  16  -1  465.05   32.60
  14 -16   1  765.32   46.10
 -14  16  -1  716.43   39.90
  15 -16   1   57.39   23.50
 -15  16  -1   59.59   20.80
  16 -16   1  670.83   46.20
 -16  16  -1  750.12   44.70
  17 -16   1   70.39   25.00
 -17  16  -1   24.50   21.20
  17 -17  -1  118.19   27.30
 -17  17   1   90.49   23.80
  16 -17  -1   41.20   23.60
 -16  17   1   81.69   22.60
  15 -17  -1  284.47   35.00
 -15  17   1  370.36   33.30
  14 -17  -1  135.69   24.60
 -14  17   1  101.69   21.00
  13 -17  -1  290.07   31.20
 -13  17   1  261.67   28.00
  12 -17  -1  351.06   30.60
 -12  17   1  254.07   25.60
  11 -17  -1  188.78   25.80
 -11  17   1  220.08   24.40
  10 -17  -1    7.00   14.60
 -10  17   1   17.90   13.10
   9 -17  -1  284.27   24.80
  -9  17   1  246.98   21.60
   8 -17  -1  205.08   22.10
  -8  17   1  163.98   19.00
   7 -17  -1  667.53   30.10
  -7  17   1  629.74   28.70
   6 -17  -1  485.85   25.80
  -6  17   1  555.54   25.50
   5 -17  -1  737.23   29.50
  -5  17   1  775.22   29.30
   4 -17  -1  266.17   18.60
  -4  17   1  248.28   18.60
   3 -17  -1  612.94   24.10
  -3 -17   1  572.14   18.50
  -3  17   1  604.64   25.30
   2 -17  -1 1253.57   35.80
  -2  17   1 1215.28   37.90
   1 -17  -1   21.30    8.50
  -1 -17   1   19.70    7.20
   1  17  -1   -7.30    8.50
  -1  17   1    0.40    8.60
  -1  17   1   -0.50   11.80
   0 -17   1   97.59   12.40
   0 -17  -1   72.59   11.60
   0  17  -1  102.49   14.20
   0  17   1   90.59   12.40
   0  17   1  105.39   12.70
   1 -17   1 1017.90   30.90
  -1 -17  -1 1013.70   28.00
  -1 -17  -1  948.41   30.00
  -1  17  -1 1020.40   34.30
   1  17   1 1103.99   30.20
   1  17   1 1037.70   33.10
  -2 -17  -1  -14.80    7.50
   2 -17   1    1.70    8.60
   2  17   1    0.30    9.00
  -2  17  -1  -11.50    8.70
  -3 -17  -1   66.99    9.80
   3 -17   1   78.59   11.90
  -3  17  -1   49.30   11.20
   4 -17   1  634.54   26.70
  -4 -17  -1  569.04   21.40
  -4  17  -1  641.34   26.90
  -5 -17  -1  223.48   14.80
   5 -17   1  227.48   19.70
  -5  17  -1  233.18   19.30
  -6 -17  -1   25.90    9.00
   6 -17   1   13.90   11.60
  -6  17  -1   30.40   11.50
  -7 -17  -1  913.41   28.20
   7 -17   1  862.81   36.20
  -7  17  -1  898.01   34.20
   7  17   1  887.21   28.20
  -8 -17  -1    5.60   10.00
   8 -17   1    6.60   12.80
   8  17   1    0.50   10.00
  -8  17  -1   11.70   12.10
  -9 -17  -1   70.19   11.70
   9 -17   1   94.09   17.10
  -9  17  -1   93.29   15.80
 -10 -17  -1 1467.85   42.20
  10 -17   1 1398.96   52.79
 -10  17  -1 1454.65   49.50
 -11 -17  -1   -1.30   11.70
  11 -17   1    8.50   15.40
 -11  17  -1   -5.90   13.40
  12 -17   1   53.89   18.70
 -12  17  -1   12.10   15.40
  13 -17   1 1099.79   51.19
 -13  17  -1 1063.29   45.70
  14 -17   1   36.30   21.00
 -14  17  -1   11.50   17.20
  15 -17   1    7.00   19.60
 -15  17  -1   41.10   20.00
  16 -17   1  309.47   37.60
 -16  17  -1  339.87   35.20
  17 -18  -1   35.50   22.00
 -17  18   1    5.20   19.80
  16 -18  -1  -20.70   18.80
 -16  18   1  -30.30   17.30
  15 -18  -1  433.26   39.10
 -15  18   1  408.26   35.00
  14 -18  -1   30.60   19.60
 -14  18   1   29.10   17.80
  13 -18  -1  301.07   33.00
 -13  18   1  331.37   29.40
  12 -18  -1   25.00   17.00
 -12  18   1   -5.00   13.70
  11 -18  -1   58.39   18.10
 -11  18   1   38.40   15.40
  10 -18  -1   94.89   19.00
 -10  18   1   61.89   15.60
   9 -18  -1 1342.37   48.60
  -9  18   1 1447.16   47.40
   8 -18  -1  123.09   20.60
  -8  18   1  136.29   18.70
   7 -18  -1  277.17   22.50
  -7  18   1  238.98   20.90
   6 -18  -1  -13.40   10.30
  -6  18   1    4.80   10.00
  -5  18   1    8.60   10.00
   4 -18  -1   18.20    9.90
  -4  18   1   31.30   10.70
   3 -18  -1 1332.37   38.80
  -3 -18   1 1277.67   33.00
  -3  18   1 1301.87   40.10
   2 -18  -1   -0.10    8.30
  -2  18   1    1.40    9.40
   1 -18  -1 2010.90   49.70
  -1 -18   1 1865.21   46.80
  -1  18   1 1899.21   52.49
   1  18  -1 1951.60   53.29
   0 -18   1    2.70    8.00
   0 -18  -1   11.60    7.80
   0  18   1   -3.90    8.90
   0  18  -1   11.10    9.30
   1 -18   1    1.60    8.50
  -1 -18  -1    0.00    8.30
  -1 -18  -1    2.50    7.10
   1  18   1   -7.20    8.60
  -1  18  -1    5.60    9.50
   2 -18   1  593.84   23.70
  -2 -18  -1  565.94   21.70
   2  18   1  618.74   25.10
  -2  18  -1  576.24   25.70
  -3 -18  -1 1192.08   34.30
   3 -18   1 1243.48   38.50
  -3  18  -1 1269.17   39.70
   4 -18   1   54.99   12.10
  -4 -18  -1   18.30    9.30
  -4  18  -1   38.60   11.40
  -5 -18  -1  713.33   24.10
   5 -18   1  677.13   30.10
  -5  18  -1  691.93   29.10
  -6 -18  -1    4.80    9.10
   6 -18   1   -1.10   11.10
  -6  18  -1    2.70   10.60
  -7 -18  -1   25.80    9.90
   7 -18   1   42.30   13.30
  -7  18  -1   34.40   12.20
  -8 -18  -1  241.98   16.80
   8 -18   1  281.67   25.20
  -8  18  -1  272.67   22.40
   9 -18   1  441.96   30.10
  -9 -18  -1  444.76   21.20
  -9  18  -1  414.36   27.50
 -10 -18  -1   21.60   11.40
  10 -18   1   19.70   15.30
 -10  18  -1   21.40   14.20
  11 -18   1  356.06   31.40
 -11  18  -1  359.76   28.30
  12 -18   1   30.80   18.40
 -12  18  -1   -6.70   14.70
  13 -18   1   25.40   20.40
 -13  18  -1   35.90   16.80
  14 -18   1  107.09   24.20
 -14  18  -1  100.69   21.50
  15 -18   1  182.18   29.20
 -15  18  -1  190.58   30.10
  16 -18   1  -15.20   19.40
 -16  18  -1   59.19   21.70
  17 -19  -1  468.45   43.40
 -17  19   1  430.76   38.70
  16 -19  -1    7.70   20.20
 -16  19   1   21.80   19.50
  15 -19  -1   -3.40   18.40
 -15  19   1   -8.40   17.00
  14 -19  -1   87.39   22.10
 -14  19   1   26.50   18.40
  13 -19  -1   23.30   18.10
 -13  19   1   55.39   18.10
  12 -19  -1  142.09   22.50
 -12  19   1  125.29   19.70
  11 -19  -1  411.16   31.70
 -11  19   1  399.66   29.10
  10 -19  -1   60.59   17.30
 -10  19   1   64.79   16.00
   9 -19  -1  143.69   23.10
  -9  19   1  159.18   21.00
   8 -19  -1   98.99   17.10
  -8  19   1   87.39   15.70
   7 -19  -1   58.89   14.20
  -7  19   1   50.29   13.30
   6 -19  -1  636.54   30.10
  -6  19   1  732.93   30.50
   5 -19  -1 1778.62   51.39
  -5  19   1 1734.43   51.69
   4 -19  -1   52.19   11.80
  -4  19   1   46.60   12.00
  -3 -19   1  441.76   16.90
   3 -19  -1  470.85   22.50
  -3  19   1  486.35   24.00
   2 -19  -1   28.10    9.60
  -2  19   1   11.50   10.50
  -1 -19   1  420.96   17.40
   1 -19  -1  461.85   19.90
  -1  19   1  429.36   22.60
   1  19  -1  373.06   22.20
   0 -19  -1 1970.20   48.30
   0 -19   1 1853.01   48.70
   0  19  -1 1965.50   53.69
   0  19   1 1879.01   52.79
  -1 -19  -1  709.63   25.50
  -1 -19  -1  732.43   22.90
   1 -19   1  748.43   26.20
  -1  19  -1  708.73   28.80
   1  19   1  716.23   28.00
   2 -19   1   14.90   10.20
  -2 -19  -1    7.00    8.70
  -2  19  -1   12.70   10.00
   2  19   1   11.20   10.20
   3 -19   1  567.34   24.80
  -3 -19  -1  535.35   21.40
  -3  19  -1  559.04   26.20
  -4 -19  -1  187.78   14.60
   4 -19   1  163.68   17.70
  -4  19  -1  130.59   17.30
   5 -19   1  598.14   28.10
  -5 -19  -1  562.84   22.10
  -5  19  -1  612.84   28.10
  -6 -19  -1  289.77   17.20
   6 -19   1  343.17   23.90
  -6  19  -1  293.97   22.60
   7 -19   1  560.54   30.10
  -7 -19  -1  514.15   21.30
  -7  19  -1  521.05   28.00
  -8 -19  -1    9.80    9.60
   8 -19   1   -4.80   12.90
  -8  19  -1  -10.30   11.50
   9 -19   1   -5.30   13.80
  -9 -19  -1   18.20   10.70
  -9  19  -1   22.40   13.10
 -10 -19  -1    2.10   11.40
  10 -19   1    2.90   15.70
 -10  19  -1    5.20   14.20
  11 -19   1   30.40   18.00
 -11  19  -1   26.90   15.40
  12 -19   1  243.28   30.80
 -12  19  -1  187.88   26.60
  13 -19   1   57.59   21.60
 -13  19  -1   19.40   16.30
  14 -19   1  -15.60   17.70
 -14  19  -1  -20.80   15.70
  15 -19   1  484.25   40.70
 -15  19  -1  450.25   36.00
  16 -19   1   43.80   23.30
 -16  19  -1  112.39   24.60
  16 -20  -1   57.69   22.40
 -16  20   1  106.89   24.20
  15 -20  -1   52.79   21.80
 -15  20   1   -4.60   17.10
  14 -20  -1    2.70   18.70
 -14  20   1   10.70   17.10
  13 -20  -1  292.67   33.30
 -13  20   1  316.37   30.90
  12 -20  -1  173.28   28.30
 -12  20   1  155.48   25.40
  11 -20  -1  189.58   27.20
 -11  20   1  154.18   24.30
  10 -20  -1  110.69   20.40
 -10  20   1   76.59   16.70
   9 -20  -1   80.99   17.10
  -9  20   1   63.49   15.70
   8 -20  -1  638.14   32.60
  -8  20   1  623.24   31.30
   7 -20  -1 1099.99   41.30
  -7  20   1 1139.29   40.90
   6 -20  -1  890.21   35.60
  -6  20   1  929.21   35.90
   5 -20  -1  377.96   23.30
  -5  20   1  351.56   23.10
   4 -20  -1  463.35   23.70
  -4 -20   1  464.35   16.90
  -4  20   1  486.55   25.10
   3 -20  -1   23.40   10.30
  -3 -20   1   17.70    8.00
  -3  20   1   25.10   11.30
   2 -20  -1  860.61   28.80
  -2  20   1  753.32   31.00
   2  20  -1  810.62   31.80
  -1 -20   1 2265.17   54.89
   1 -20  -1 2333.37   57.49
   1  20  -1 2242.68   61.89
  -1  20   1 2281.27   61.49
   0 -20   1   19.00    8.80
   0 -20  -1   16.60    8.80
   0  20   1   43.90   11.70
   0  20  -1   30.20   11.00
  -1 -20  -1  282.67   17.30
  -1 -20  -1  269.67   14.60
   1 -20   1  288.57   18.20
   1  20   1  286.67   20.10
  -1  20  -1  278.07   20.40
  -2 -20  -1  263.07   16.50
   2 -20   1  245.88   18.40
  -2  20  -1  210.78   19.80
   2  20   1  266.87   20.00
   3 -20   1  151.58   17.60
  -3 -20  -1  180.78   15.10
  -3  20  -1  137.19   18.10
  -4 -20  -1  425.16   19.50
   4 -20   1  407.46   24.00
  -4  20  -1  426.66   24.70
  -5 -20  -1  349.17   18.10
   5 -20   1  336.87   23.90
  -5  20  -1  317.77   23.30
  -6 -20  -1   19.10   10.30
   6 -20   1   -0.60   12.60
  -6  20  -1   30.10   12.80
   7 -20   1  319.67   25.80
  -7 -20  -1  313.77   18.00
  -7  20  -1  275.97   23.40
  -8 -20  -1   67.69   11.50
   8 -20   1   51.09   16.40
  -8  20  -1   90.69   16.60
  -9 -20  -1   93.69   15.20
   9 -20   1   75.99   18.30
  -9  20  -1   71.49   16.80
  10 -20   1  183.18   27.70
 -10  20  -1  187.98   24.30
  11 -20   1  297.57   31.20
 -11  20  -1  265.17   27.00
  12 -20   1   65.99   20.60
 -12  20  -1   55.69   17.50
  13 -20   1   67.69   21.40
 -13  20  -1   72.99   19.50
  14 -20   1  134.09   25.60
 -14  20  -1  123.49   21.80
  15 -20   1   50.39   21.70
 -15  20  -1   85.39   22.00
  16 -20   1  302.47   38.60
 -16  20  -1  301.27   34.50
  16 -21  -1   48.50   21.60
 -16  21   1   22.50   19.80
  15 -21  -1   15.70   19.50
 -15  21   1   26.10   19.70
  14 -21  -1  115.59   24.60
 -14  21   1   29.10   18.70
  13 -21  -1   88.69   22.30
 -13  21   1  123.49   21.60
  12 -21  -1  352.66   34.20
 -12  21   1  391.56   31.20
  11 -21  -1  225.58   28.40
 -11  21   1  222.88   25.60
 -10  21   1   60.99   17.00
   9 -21  -1  132.29   20.30
  -9  21   1  109.59   17.90
   8 -21  -1  792.82   36.80
  -8  21   1  732.13   34.50
   7 -21  -1   39.50   14.40
  -7  21   1   36.10   13.40
   6 -21  -1  622.74   30.50
  -6  21   1  584.34   29.60
   5 -21  -1  122.79   16.00
  -5  21   1  161.08   19.40
  -4 -21   1  163.08   12.10
   4 -21  -1  164.38   18.10
  -4  21   1  152.18   18.80
   3 -21  -1   17.20   10.30
  -3 -21   1  -10.60    7.60
  -3  21   1    5.60   11.10
   2 -21  -1    6.10    9.30
  -2  21   1   15.50   11.60
   2  21  -1   14.50   11.10
   1 -21  -1  386.66   19.60
  -1 -21   1  361.16   17.00
   1  21  -1  342.37   22.90
  -1  21   1  384.96   22.80
   0 -21  -1 1295.67   35.70
   0 -21   1 1226.38   35.80
   0  21  -1 1224.18   41.20
   0  21   1 1272.37   41.40
  -1 -21  -1    4.30    8.00
   1 -21   1   10.40    9.90
  -1 -21  -1   10.70    9.80
  -1  21  -1    8.60   11.30
   1  21   1    1.70   10.30
   2 -21   1   13.50   10.60
  -2 -21  -1    2.20    9.30
  -2  21  -1    4.40   11.10
   2  21   1   -5.80   10.00
  -3 -21  -1  148.39   14.80
   3 -21   1  138.99   18.00
   3  21   1  138.79   18.60
  -3  21  -1  143.69   18.90
  -4 -21  -1  262.47   17.10
   4 -21   1  291.67   22.00
  -4  21  -1  285.07   22.80
   5 -21   1  743.43   33.00
  -5 -21  -1  760.72   26.30
  -5  21  -1  754.42   33.20
   6 -21   1  449.76   28.10
  -6 -21  -1  497.55   21.00
  -6  21  -1  459.25   27.30
   7 -21   1  -17.20   12.40
  -7 -21  -1   11.90    9.90
  -7  21  -1    8.00   12.50
  -8 -21  -1   -7.80   10.10
   8 -21   1   -3.20   14.00
  -8  21  -1  -12.80   12.40
   9 -21   1   14.90   15.80
  -9  21  -1   47.00   15.40
  10 -21   1  -19.40   15.60
 -10  21  -1    0.60   14.20
  11 -21   1  410.16   34.50
 -11  21  -1  372.96   29.80
  12 -21   1  254.37   32.20
 -12  21  -1  215.58   27.30
  13 -21   1   35.40   19.70
 -13  21  -1    9.90   18.00
  14 -21   1   24.20   19.50
 -14  21  -1   58.69   20.00
  15 -21   1   -6.20   19.30
 -15  21  -1   -4.50   19.10
  16 -22  -1  303.47   38.50
 -16  22   1  215.28   32.80
  15 -22  -1  296.27   36.40
 -15  22   1  284.67   32.80
  14 -22  -1   34.20   19.80
 -14  22   1   30.70   18.50
  13 -22  -1   17.40   18.90
 -13  22   1  -21.30   15.60
  12 -22  -1  237.68   30.60
 -12  22   1  234.48   28.10
  11 -22  -1  299.07   30.80
 -11  22   1  347.77   29.50
  10 -22  -1  185.58   27.20
 -10  22   1  195.58   24.80
   9 -22  -1  169.18   25.20
  -9  22   1  166.88   23.10
   8 -22  -1   22.30   14.80
  -8  22   1   13.60   12.70
   7 -22  -1  -15.40   12.10
  -7  22   1    9.60   12.60
   6 -22  -1    4.60   12.00
  -6  22   1   15.10   12.80
   5 -22  -1  288.57   22.70
  -5  22   1  303.77   23.40
   4 -22  -1  109.49   18.00
  -4 -22   1  108.59   12.10
  -4  22   1  131.59   19.30
  -3 -22   1  815.72   25.90
   3 -22  -1  879.61   31.80
  -3  22   1  837.12   33.90
   2 -22  -1    7.70   10.50
  -2  22   1   21.40   11.90
   2  22  -1   19.60   11.90
  -1 -22   1  266.57   15.80
   1 -22  -1  292.97   18.10
  -1  22   1  248.48   20.90
   1  22  -1  260.67   21.80
   0 -22   1  110.69   14.00
   0 -22  -1   87.59   13.60
   0  22  -1   91.59   14.60
   0  22   1   75.29   13.90
  -1 -22  -1  223.28   18.00
  -1 -22  -1  287.67   15.60
   1 -22   1  266.67   18.40
   1  22   1  265.07   21.30
  -1  22  -1  254.57   21.80
   2 -22   1   48.00   12.30
  -2 -22  -1   46.40   11.10
  -2  22  -1   54.89   13.90
   2  22   1   48.20   12.90
   3 -22   1  782.22   31.60
  -3 -22  -1  760.12   27.20
  -3  22  -1  756.62   32.70
   3  22   1  776.62   32.10
   4 -22   1  260.57   22.20
  -4 -22  -1  267.97   17.90
  -4  22  -1  242.38   22.50
  -5 -22  -1   30.90   10.80
   5 -22   1   23.90   13.40
  -5  22  -1   28.00   13.70
  -6 -22  -1   12.00   10.70
   6 -22   1    9.70   13.60
  -6  22  -1  -11.40   11.80
  -7 -22  -1   56.59   11.70
   7 -22   1   93.99   17.90
  -7  22  -1   79.59   16.50
  -8 -22  -1   30.30   11.90
   8 -22   1   36.60   16.70
  -8  22  -1   38.00   15.40
   9 -22   1  112.69   20.90
  -9  22  -1   99.79   18.60
  10 -22   1  238.78   30.20
 -10  22  -1  281.57   27.60
  11 -22   1  117.29   23.70
 -11  22  -1  110.89   20.10
  12 -22   1    2.20   18.60
 -12  22  -1   21.40   17.10
  13 -22   1  428.86   38.70
 -13  22  -1  406.46   34.80
  14 -22   1   18.00   20.30
 -14  22  -1    4.70   18.60
  15 -22   1   -1.80   19.40
 -15  22  -1   17.50   19.10
  15 -23  -1   62.49   23.10
 -15  23   1   82.79   22.70
  14 -23  -1   -2.50   18.20
 -14  23   1   22.00   18.10
  13 -23  -1  208.68   32.20
 -13  23   1  200.98   28.90
  12 -23  -1  183.68   26.10
 -12  23   1  172.88   23.80
  11 -23  -1  456.45   35.30
 -11  23   1  392.06   31.20
  10 -23  -1   10.50   15.70
 -10  23   1    4.50   14.20
   9 -23  -1  269.57   28.20
  -9  23   1  268.37   26.30
   8 -23  -1   20.40   14.80
  -8  23   1   -8.90   12.50
   7 -23  -1   78.49   16.80
  -7  23   1   71.99   15.10
   6 -23  -1  111.19   16.80
  -6  23   1   96.49   16.40
   5 -23  -1  932.41   36.10
  -5  23   1  902.31   37.10
  -4 -23   1   13.30    8.60
   4 -23  -1   -1.80   11.30
  -4  23   1   -1.00   11.80
   3 -23  -1  861.01   31.80
  -3 -23   1  818.22   26.40
   3  23  -1  806.42   34.60
  -3  23   1  840.82   34.70
   2 -23  -1   81.09   13.00
  -2  23   1   77.19   14.90
   2  23  -1   86.79   15.20
  -1 -23   1  506.05   20.50
   1 -23  -1  541.15   23.20
  -1  23   1  518.85   27.10
   1  23  -1  475.65   27.10
   0 -23   1   93.59   14.20
   0 -23  -1   84.69   14.00
   0  23  -1  118.99   19.40
   0  23   1  116.49   19.00
   1 -23   1 1031.80   33.60
  -1 -23  -1 1059.89   30.40
  -1 -23  -1  976.30   33.20
  -1  23  -1  968.10   37.90
   1  23   1 1034.20   37.50
  -2 -23  -1   23.10   10.80
   2 -23   1   39.70   12.10
   2  23   1   22.10   12.90
  -2  23  -1   17.40   13.00
  -3 -23  -1  287.47   18.80
   3 -23   1  318.17   22.70
  -3  23  -1  300.27   24.20
   3  23   1  338.57   23.60
  -4 -23  -1  553.14   23.20
   4 -23   1  570.94   28.90
  -4  23  -1  496.95   29.40
  -5 -23  -1  105.19   13.40
   5 -23   1   87.99   17.00
  -5  23  -1   90.89   16.70
  -6 -23  -1   -2.10   11.00
   6 -23   1   45.70   15.50
  -6  23  -1   11.90   13.70
   7 -23   1  306.97   27.60
  -7 -23  -1  281.67   18.50
  -7  23  -1  299.67   26.10
   8 -23   1  157.28   22.10
  -8  23  -1   71.89   17.30
   9 -23   1  216.18   28.80
  -9  23  -1  220.58   25.80
  10 -23   1  329.27   31.80
 -10  23  -1  301.17   28.90
  11 -23   1   31.00   19.80
 -11  23  -1   31.70   16.90
  12 -23   1   72.59   21.80
 -12  23  -1   39.00   18.50
  13 -23   1  173.68   28.30
 -13  23  -1  186.48   28.40
  14 -23   1   36.60   21.70
 -14  23  -1   97.29   22.10
  15 -23   1  292.27   38.30
 -15  23  -1  266.27   34.10
  15 -24  -1  224.08   35.00
 -15  24   1  228.68   32.90
  14 -24  -1   27.00   20.20
 -14  24   1    0.30   18.10
  13 -24  -1  781.12   45.70
 -13  24   1  769.92   43.30
  12 -24  -1   33.00   18.80
 -12  24   1   14.00   16.80
  11 -24  -1   52.79   18.90
 -11  24   1   26.80   16.40
  10 -24  -1   30.60   17.20
 -10  24   1   12.10   14.90
   9 -24  -1  265.07   28.10
  -9  24   1  251.37   26.30
   8 -24  -1   16.20   15.20
  -8  24   1   -6.20   13.30
   7 -24  -1 1902.41   59.49
  -7  24   1 1831.32   58.69
   6 -24  -1   60.99   15.00
  -6  24   1   30.30   13.90
   5 -24  -1   73.69   15.50
  -5  24   1   68.29   15.80
  -4 -24   1    6.60    9.00
   4 -24  -1   21.30   12.70
  -4  24   1   35.00   13.70
   3 -24  -1  609.64   27.60
  -3 -24   1  582.24   21.90
   3  24  -1  541.25   29.60
  -3  24   1  570.54   29.70
   2 -24  -1   12.00   10.70
  -2  24   1   -3.00   12.20
   2  24  -1   12.60   12.80
  -1 -24   1 2863.81   68.49
   1 -24  -1 3005.60   71.79
  -1  24   1 2805.12   76.79
   1  24  -1 2785.52   76.99
   0 -24   1  122.99   15.20
   0 -24  -1  113.29   14.90
   0  24   1  112.99   16.60
   0  24  -1   85.89   16.10
  -1 -24  -1  260.37   16.30
   1 -24   1  271.27   19.30
  -1 -24  -1  268.67   19.10
  -1  24  -1  217.58   22.70
   1  24   1  279.07   22.80
   2 -24   1  274.07   20.40
  -2 -24  -1  245.08   18.40
   2  24   1  295.27   23.20
  -2  24  -1  268.07   24.00
   3 -24   1  163.78   20.20
  -3 -24  -1  173.48   16.80
   3  24   1  181.48   21.20
  -3  24  -1  161.38   21.80
  -4 -24  -1   24.20   11.60
   4 -24   1   60.19   15.10
   4  24   1   54.79   14.50
  -4  24  -1   29.80   14.70
  -5 -24  -1 2019.10   52.59
   5 -24   1 2041.40   60.79
  -5  24  -1 1937.31   60.99
   6 -24   1  681.93   34.40
  -6 -24  -1  609.74   25.20
  -6  24  -1  692.23   34.20
   7 -24   1   59.49   17.60
  -7  24  -1   51.89   16.10
   8 -24   1   83.89   19.40
  -8  24  -1  108.79   18.90
   9 -24   1  280.37   30.50
  -9  24  -1  269.47   28.10
  10 -24   1   48.40   19.40
 -10  24  -1   58.39   18.30
  11 -24   1 1008.10   48.70
 -11  24  -1 1064.09   47.80
  12 -24   1  464.75   37.50
 -12  24  -1  366.16   33.10
  13 -24   1  -20.90   18.10
 -13  24  -1    4.40   17.60
  14 -24   1  105.89   24.50
 -14  24  -1   62.19   21.00
  15 -25  -1    7.70   19.70
 -15  25   1   16.80   20.20
  14 -25  -1  190.98   29.10
 -14  25   1  192.98   30.90
  13 -25  -1   72.69   21.30
 -13  25   1   99.79   22.10
  12 -25  -1  140.59   24.80
 -12  25   1  141.59   23.60
  11 -25  -1 1415.86   57.49
 -11  25   1 1463.85   55.79
  10 -25  -1  619.84   37.90
 -10  25   1  564.04   35.60
   9 -25  -1   47.80   18.00
  -9  25   1   60.69   18.00
   8 -25  -1  140.19   20.70
  -8  25   1  133.59   20.00
   7 -25  -1  444.76   30.20
  -7  25   1  593.14   32.40
   6 -25  -1  178.28   22.80
  -6  25   1  197.88   23.60
   5 -25  -1  632.14   31.50
  -5  25   1  683.03   33.90
  -4 -25   1  593.44   22.10
   4 -25  -1  638.04   30.30
  -4  25   1  649.93   32.50
  -3 -25   1   83.09   13.60
   3 -25  -1  134.69   18.80
  -3  25   1  106.49   17.20
   3  25  -1   78.69   16.40
   2 -25  -1   -7.70   10.90
   2  25  -1   12.80   13.40
  -2  25   1   25.30   13.50
  -1 -25   1  185.18   15.40
   1 -25  -1  193.78   17.80
   1  25  -1  190.88   21.70
  -1  25   1  177.58   21.80
   0 -25   1  348.77   19.80
   0 -25  -1  355.46   19.80
   0  25  -1  306.67   25.70
   0  25   1  357.86   25.60
   1 -25   1 1146.89   36.80
  -1 -25  -1 1120.09   36.60
  -1  25  -1 1134.39   42.50
   1  25   1 1084.59   40.80
   2 -25   1  479.65   25.00
  -2 -25  -1  523.65   23.70
  -2  25  -1  446.06   28.40
   2  25   1  437.66   27.00
   3 -25   1  799.82   32.90
  -3 -25  -1  799.12   29.20
  -3  25  -1  759.12   36.00
   3  25   1  819.62   34.80
   4 -25   1  139.99   21.10
  -4 -25  -1  158.58   16.90
  -4  25  -1  140.09   22.60
   4  25   1  132.39   21.00
  -5 -25  -1  504.95   23.50
   5 -25   1  522.55   30.10
  -5  25  -1  553.44   31.30
   6 -25   1  864.11   38.40
  -6 -25  -1  819.02   29.80
  -6  25  -1  827.72   38.30
   7 -25   1  515.95   32.80
  -7  25  -1  519.25   32.80
   8 -25   1  396.66   31.50
  -8  25  -1  446.26   31.20
   9 -25   1 1279.77   51.39
  -9  25  -1 1186.98   49.30
  10 -25   1  184.68   29.10
 -10  25  -1  170.28   23.40
  11 -25   1  369.36   35.10
 -11  25  -1  499.45   34.70
  12 -25   1  213.68   29.20
 -12  25  -1  226.08   30.00
  13 -25   1  109.39   24.80
 -13  25  -1   83.99   22.30
  14 -25   1   80.29   24.00
 -14  25  -1   41.20   20.90
  14 -26  -1   45.90   22.20
 -14  26   1   24.90   19.50
  13 -26  -1  825.92   46.70
 -13  26   1  722.63   43.80
  12 -26  -1   78.99   21.80
 -12  26   1   86.99   20.70
  11 -26  -1  228.88   29.80
 -11  26   1  279.07   29.90
  10 -26  -1   81.99   20.00
 -10  26   1   84.49   19.10
   9 -26  -1  104.89   20.50
  -9  26   1  105.59   20.30
   8 -26  -1   49.80   16.20
  -8  26   1   75.89   18.40
   7 -26  -1 1515.35   52.79
  -7  26   1 1483.85   52.59
   6 -26  -1  121.09   17.90
  -6  26   1  123.99   19.20
   5 -26  -1  152.98   22.10
  -5  26   1  137.19   22.70
  -4 -26   1   11.10    9.80
   4 -26  -1   11.70   13.20
   4  26  -1   12.30   14.60
  -4  26   1   23.90   14.50
   3 -26  -1    9.30   12.10
  -3 -26   1   10.20    9.90
   3  26  -1   -5.80   13.50
  -3  26   1   -2.00   13.10
   2 -26  -1   11.30   11.40
   2  26  -1   -3.20   13.00
  -2  26   1    0.90   13.60
   1 -26  -1  797.52   29.50
  -1 -26   1  763.12   26.60
   1  26  -1  753.92   35.10
  -1  26   1  798.42   35.30
   0 -26   1  274.47   18.80
   0 -26  -1  300.57   18.70
   0  26  -1  265.07   25.20
   0  26   1  278.07   24.60
  -1 -26  -1   30.20   12.10
   1 -26   1   36.50   12.10
  -1  26  -1   41.10   15.10
   1  26   1   72.99   15.80
  -2 -26  -1   25.90   12.20
   2 -26   1    7.20   12.20
  -2  26  -1   31.60   15.10
   2  26   1   25.40   14.30
   3 -26   1   -4.10   12.10
  -3 -26  -1   15.00   12.00
  -3  26  -1   45.20   15.40
   3  26   1   44.60   15.20
  -4 -26  -1    4.00   11.90
   4 -26   1   20.20   13.30
   4  26   1    5.40   14.40
  -4  26  -1   19.60   14.90
  -5 -26  -1 2242.98   58.29
   5 -26   1 2260.17   66.89
   5  26   1 2217.88   66.29
  -5  26  -1 2280.27   68.59
   6 -26   1  187.88   24.60
  -6  26  -1  214.08   25.90
   7 -26   1   30.40   16.30
  -7  26  -1   60.89   17.50
   8 -26   1   17.60   16.40
  -8  26  -1   16.60   15.60
   9 -26   1   29.10   18.00
  -9  26  -1   29.00   17.40
  10 -26   1  186.38   25.50
 -10  26  -1  175.98   27.50
  11 -26   1  412.56   36.00
 -11  26  -1  348.87   33.20
  12 -26   1  538.65   41.00
 -12  26  -1  602.54   39.50
  13 -26   1   -6.20   18.60
 -13  26  -1    8.10   19.00
  14 -27  -1   -6.20   19.10
 -14  27   1   31.40   19.30
  13 -27  -1   16.30   19.60
 -13  27   1   24.80   19.60
  12 -27  -1   28.50   19.20
 -12  27   1   19.40   17.90
  11 -27  -1  469.45   37.10
 -11  27   1  592.74   37.30
  10 -27  -1  292.07   30.90
 -10  27   1  289.67   28.90
   9 -27  -1   23.60   16.70
  -9  27   1   -9.90   14.80
   8 -27  -1  -23.70   14.20
  -8  27   1   -4.80   14.40
   7 -27  -1   -4.50   13.50
  -7  27   1   37.00   16.10
   6 -27  -1   13.50   13.80
  -6  27   1  -13.40   13.50
   5 -27  -1   98.49   17.70
  -5  27   1  108.89   19.00
   4 -27  -1  446.36   26.80
  -4  27   1  397.56   29.10
   4  27  -1  427.26   30.10
   3 -27  -1  178.38   20.30
  -3 -27   1  193.38   16.20
  -3  27   1  207.28   24.20
   3  27  -1  149.88   23.40
   2 -27  -1   50.79   13.60
  -2 -27   1   63.09   12.30
   2  27  -1   48.50   15.60
  -2  27   1   75.49   17.20
  -1 -27   1   52.19   11.10
   1 -27  -1   81.59   13.40
   1  27  -1   92.59   17.50
  -1  27   1   85.39   17.00
   0 -27   1   30.00   11.20
   0 -27  -1   39.20   13.70
   0 -27  -1   11.70   10.40
   0  27   1   19.00   14.50
   0  27  -1   24.00   15.30
   1 -27   1  631.64   27.90
  -1 -27  -1  634.94   28.10
  -1  27  -1  640.74   33.10
   1  27   1  645.94   33.30
  -2 -27  -1  240.88   19.70
   2 -27   1  261.17   21.70
  -2  27  -1  257.27   25.90
   2  27   1  252.87   24.60
  -3 -27  -1   82.89   14.60
   3 -27   1   97.89   16.40
   3  27   1   77.19   17.10
  -3  27  -1  101.49   19.10
   4 -27   1   -8.30   13.30
  -4 -27  -1   -3.20   12.00
   4  27   1  -13.10   14.90
  -4  27  -1   39.90   16.40
   5 -27   1   56.29   15.70
  -5  27  -1   22.10   15.90
   5  27   1   51.39   16.40
   6 -27   1   15.00   14.60
  -6  27  -1   24.30   15.90
   7 -27   1   69.99   18.50
  -7  27  -1   80.99   19.20
   8 -27   1  507.65   34.90
  -8  27  -1  499.65   33.60
   9 -27   1  241.28   30.10
  -9  27  -1  227.78   28.10
  10 -27   1   26.40   18.60
 -10  27  -1   13.10   17.00
  11 -27   1   27.20   20.10
 -11  27  -1   31.70   19.10
  12 -27   1   44.70   20.90
 -12  27  -1    8.30   17.30
  13 -27   1   44.20   22.30
 -13  27  -1   45.70   20.50
  13 -28  -1   20.90   20.50
 -13  28   1   -9.80   17.60
  12 -28  -1   73.29   22.20
 -12  28   1   51.69   20.60
  11 -28  -1  107.29   22.80
 -11  28   1  100.19   21.80
  10 -28  -1   73.19   20.50
 -10  28   1   62.39   18.70
   9 -28  -1  109.49   21.20
  -9  28   1   83.89   19.80
   8 -28  -1  348.77   31.00
  -8  28   1  367.26   30.40
   7 -28  -1   41.60   15.80
  -7  28   1    0.10   15.10
   6 -28  -1   24.70   14.70
  -6  28   1   22.80   15.70
   5 -28  -1   -0.90   13.10
   5  28  -1   -7.60   15.70
  -5  28   1   -0.10   14.40
   4 -28  -1   -9.90   12.70
  -4  28   1   20.00   16.00
   4  28  -1   21.20   16.30
   3 -28  -1   13.20   13.00
  -3 -28   1   16.70   11.00
  -3  28   1   34.60   16.10
   3  28  -1   26.00   15.80
   2 -28  -1  184.88   20.40
  -2 -28   1  176.18   17.60
   2  28  -1  192.98   24.40
  -2  28   1  180.48   22.10
   1 -28  -1   16.30   11.50
  -1 -28   1   -2.50    9.40
  -1  28   1   12.20   14.60
   1  28  -1   -3.50   14.40
   0 -28  -1  177.88   19.40
   0 -28  -1  172.08   17.40
   0 -28   1  136.79   17.30
   0  28   1  171.28   24.00
   0  28  -1  159.48   21.90
  -1 -28  -1   22.40   13.20
   1 -28   1   38.80   12.50
   1  28   1   42.50   16.30
  -1  28  -1   31.90   15.80
  -2 -28  -1   19.50   12.50
   2 -28   1   -1.40   12.10
   2  28   1   19.50   15.30
  -2  28  -1   24.30   15.60
   3 -28   1   25.70   13.90
  -3 -28  -1   26.10   13.00
   3  28   1    4.90   14.90
  -3  28  -1   34.70   16.20
  -4 -28  -1  180.58   19.30
   4 -28   1  169.28   23.50
  -4  28  -1  152.18   25.10
   4  28   1  220.58   25.20
   5 -28   1  111.29   18.70
   5  28   1  111.59   19.80
  -5  28  -1   87.09   19.10
   6 -28   1   -0.80   14.50
   6  28   1    1.00   16.90
  -6  28  -1   23.70   16.30
   7 -28   1  162.18   22.30
  -7  28  -1  111.29   21.50
   8 -28   1   28.20   17.50
  -8  28  -1   23.30   16.80
   9 -28   1   95.59   21.40
  -9  28  -1   33.40   17.90
  10 -28   1  324.27   34.50
 -10  28  -1  371.06   33.60
  11 -28   1   25.00   19.40
 -11  28  -1   19.80   19.20
  12 -28   1   62.29   23.70
 -12  28  -1   73.89   22.10
  13 -28   1   33.10   22.60
 -13  28  -1   46.90   20.20
  13 -29  -1    4.30   19.50
 -13  29   1    8.10   18.20
  12 -29  -1  640.34   44.20
 -12  29   1  636.64   41.50
  11 -29  -1   90.29   22.30
 -11  29   1   87.29   22.10
  10 -29  -1    5.50   17.80
 -10  29   1    0.60   16.50
   9 -29  -1   28.20   17.70
  -9  29   1   -7.60   15.30
   8 -29  -1   93.29   20.10
  -8  29   1  128.49   21.50
   7 -29  -1  152.28   25.50
  -7  29   1  167.78   26.30
   6 -29  -1  399.06   29.50
  -6  29   1  372.16   30.50
   5 -29  -1    4.60   14.20
   5  29  -1   35.50   17.70
  -5  29   1   40.30   17.20
   4 -29  -1   -9.80   12.80
  -4  29   1   11.10   15.10
   4  29  -1  -24.80   15.30
   3 -29  -1   21.90   13.20
   3  29  -1   -6.70   15.20
  -3  29   1   -9.90   15.40
  -2 -29   1  108.69   17.20
   2 -29  -1  117.49   16.20
   2  29  -1  133.89   20.50
  -2  29   1  142.49   20.80
   1 -29  -1   68.19   13.30
  -1  29   1   56.59   17.60
   1  29  -1   77.99   19.20
   0 -29  -1  558.74   28.60
   0 -29  -1  620.74   25.40
   0 -29   1  548.55   25.40
   0  29  -1  561.24   33.50
   0  29   1  552.24   32.90
   1 -29   1   51.19   13.00
  -1 -29  -1   49.20   14.40
  -1  29  -1   72.39   18.10
   1  29   1   73.49   18.20
  -2 -29  -1    5.30   12.50
   2 -29   1    8.80   12.30
  -2  29  -1    1.50   16.10
   2  29   1    6.60   15.30
  -3 -29  -1   42.40   14.00
   3 -29   1   55.59   15.40
   3  29   1   70.69   17.90
  -3  29  -1   97.69   19.80
   4 -29   1  544.05   31.60
  -4  29  -1  501.95   34.40
   4  29   1  550.94   33.80
   5 -29   1  397.36   29.90
   5  29   1  358.76   30.60
  -5  29  -1  391.46   31.20
   6 -29   1 1047.20   44.30
   6  29   1 1024.10   44.60
  -6  29  -1  995.00   45.80
   7 -29   1   -1.30   16.10
  -7  29  -1    4.90   16.00
   8 -29   1   77.49   20.00
  -8  29  -1   59.59   19.00
   9 -29   1  147.29   23.70
  -9  29  -1  118.19   22.80
  10 -29   1    1.50   18.40
 -10  29  -1   28.60   18.30
  11 -29   1  670.83   44.00
 -11  29  -1  630.54   41.60
  12 -29   1  332.77   39.40
 -12  29  -1  296.47   34.20
  12 -30  -1   59.09   22.60
 -12  30   1   58.79   21.20
  11 -30  -1  124.79   24.50
 -11  30   1  113.19   23.00
  10 -30  -1   44.40   20.00
 -10  30   1   35.50   19.00
   9 -30  -1  -16.20   15.40
  -9  30   1   -3.80   17.20
   8 -30  -1   35.10   18.10
  -8  30   1   74.19   19.70
   7 -30  -1  605.64   35.60
  -7  30   1  547.25   36.10
   6 -30  -1   13.40   15.50
  -6  30   1   15.90   16.80
   6  30  -1   41.50   18.80
   5 -30  -1  230.48   25.50
   5  30  -1  192.18   28.00
  -5  30   1  225.08   27.80
   4 -30  -1  168.98   23.30
   4  30  -1  157.98   26.20
  -4  30   1  181.18   23.10
   3 -30  -1   55.49   15.40
   3  30  -1   53.89   18.20
  -3  30   1   37.30   17.30
   2 -30  -1  606.04   29.10
   2  30  -1  618.94   35.50
  -2  30   1  551.74   34.40
   1 -30  -1  654.83   29.10
   1  30  -1  713.83   37.60
  -1  30   1  682.63   36.80
   0 -30   1    4.50   14.70
   0 -30  -1   -2.90   13.70
   0  30   1   17.20   15.70
   0  30  -1   36.10   17.10
  -1 -30  -1  499.85   26.70
   1 -30   1  471.75   26.00
   1  30   1  441.66   31.60
  -1  30  -1  537.05   34.20
  -2 -30  -1   16.80   13.40
   2 -30   1   32.40   13.50
   2  30   1    8.50   17.00
  -2  30  -1   40.50   18.20
   3 -30   1   10.00   14.00
  -3  30  -1    7.70   15.80
   3  30   1  -15.20   15.40
   4 -30   1 1011.90   41.30
  -4  30  -1  972.00   45.60
   4  30   1  910.61   42.90
   5 -30   1  573.54   33.20
  -5  30  -1  531.85   34.70
   5  30   1  415.46   32.60
   6 -30   1  110.29   20.80
   6  30   1  170.38   27.60
  -6  30  -1   90.79   20.10
   7 -30   1  362.76   32.40
   7  30   1  384.26   32.50
  -7  30  -1  363.16   32.60
   8 -30   1    8.20   17.60
  -8  30  -1   -8.70   15.40
   9 -30   1   17.00   18.90
  -9  30  -1   11.10   17.30
  10 -30   1  447.46   39.10
 -10  30  -1  433.46   36.50
  11 -30   1  287.47   35.30
 -11  30  -1  140.99   25.10
  12 -31  -1   25.80   19.90
 -12  31   1   14.30   18.70
  11 -31  -1   94.29   23.60
 -11  31   1   81.89   21.40
  10 -31  -1    0.60   17.50
 -10  31   1  -14.50   17.00
   9 -31  -1   50.29   19.10
  -9  31   1   43.60   19.90
   8 -31  -1  115.49   22.20
  -8  31   1  131.29   23.20
   7 -31  -1  155.98   26.00
  -7  31   1   93.19   20.90
   6 -31  -1  399.36   30.60
   6  31  -1  334.47   32.40
  -6  31   1  390.16   32.40
   5 -31  -1  251.47   25.80
  -5  31   1  251.37   28.70
   5  31  -1  246.58   30.10
   4 -31  -1   61.39   16.30
  -4  31   1   85.29   19.60
   4  31  -1   70.09   19.70
   3 -31  -1  127.19   17.80
  -3  31   1  110.09   20.90
   3  31  -1  107.39   20.70
   2 -31  -1   82.09   15.40
  -2  31   1  101.99   20.50
   2  31  -1  122.79   21.40
   1  31  -1  459.75   33.50
  -1  31   1  478.25   33.00
   0 -31  -1  552.54   29.90
   0  31  -1  581.64   35.70
   0  31   1  636.44   36.30
  -1 -31  -1   70.89   15.70
   1 -31   1   89.09   15.80
  -1  31  -1   87.69   19.80
   1  31   1   97.29   19.80
  -2 -31  -1   94.79   17.30
   2 -31   1   71.39   15.90
  -2  31  -1   96.69   20.80
   2  31   1   96.39   19.90
   3 -31   1  139.09   22.10
   3  31   1  132.29   21.60
  -3  31  -1  192.88   27.50
   4 -31   1   14.10   15.20
  -4  31  -1   31.50   18.60
   4  31   1   41.80   18.10
   5 -31   1   85.79   19.50
   5  31   1  125.59   21.70
  -5  31  -1  161.68   26.60
   6 -31   1  135.09   21.40
  -6  31  -1  115.29   21.70
   6  31   1   88.19   21.70
   7 -31   1   24.20   17.90
   7  31   1   12.20   18.50
  -7  31  -1   42.50   18.30
   8 -31   1   68.79   21.80
  -8  31  -1   86.29   20.70
   9 -31   1  144.59   25.60
  -9  31  -1  147.79   24.20
  10 -31   1   23.50   20.10
 -10  31  -1   10.00   18.10
  11 -31   1   71.19   24.00
 -11  31  -1   35.10   20.50
  11 -32  -1   12.60   19.20
 -11  32   1   38.60   18.90
  10 -32  -1   36.90   19.80
 -10  32   1   11.60   18.80
   9 -32  -1  205.68   29.90
  -9  32   1  130.89   23.60
   8 -32  -1   64.09   20.20
  -8  32   1   66.39   20.80
   7 -32  -1  170.38   26.80
  -7  32   1  161.18   24.80
   7  32  -1  161.88   25.30
   6 -32  -1  -18.40   15.30
   6  32  -1   17.80   18.90
  -6  32   1   32.40   17.90
   5 -32  -1   15.90   15.10
   5  32  -1  -47.50   16.60
  -5  32   1   14.10   17.20
   4 -32  -1   15.40   14.80
   4  32  -1   31.90   18.20
  -4  32   1   12.00   17.40
   3 -32  -1   33.70   15.10
  -3  32   1   38.00   18.30
   3  32  -1    5.90   17.10
   2 -32  -1   13.00   18.80
   2  32  -1   37.60   18.80
  -2  32   1    4.60   17.20
   1 -32  -1  316.07   25.40
  -1  32   1  280.97   30.20
   1  32  -1  332.67   31.20
   0 -32  -1   58.89   16.50
   0  32  -1   73.69   20.50
   0  32   1   86.59   19.50
  -1 -32  -1  -23.00   14.00
  -1  32  -1  -14.80   16.80
   1  32   1   -1.60   16.50
   2 -32   1   22.40   14.50
   2  32   1  -14.20   16.10
  -2  32  -1    5.70   17.80
   3 -32   1  230.38   24.40
  -3  32  -1  243.68   29.40
   3  32   1  228.28   28.10
   4 -32   1  -23.10   13.60
  -4  32  -1   21.50   18.30
   4  32   1    2.10   17.40
   5 -32   1   64.19   19.10
  -5  32  -1   41.10   18.90
   5  32   1    9.80   18.40
   6 -32   1   17.80   17.20
   6  32   1    7.30   18.80
  -6  32  -1   -1.70   16.60
   7 -32   1  -16.80   16.60
  -7  32  -1  -16.30   16.60
   7  32   1   43.40   20.30
   8 -32   1   27.80   18.50
   8  32   1   20.10   20.90
  -8  32  -1   14.20   18.00
   9 -32   1   21.70   20.30
  -9  32  -1   -8.70   18.00
  10 -32   1  -17.20   19.40
 -10  32  -1   51.59   20.60
  10 -33  -1   29.10   19.60
 -10  33   1   46.80   21.30
   9 -33  -1   61.09   19.80
  -9  33   1   80.49   22.20
   8 -33  -1   16.00   18.60
  -8  33   1   -4.40   17.20
   8  33  -1   -4.50   19.40
   7 -33  -1   23.10   17.30
   7  33  -1   37.60   20.10
  -7  33   1  -18.60   17.30
   6 -33  -1  324.17   30.00
   6  33  -1  234.38   31.70
  -6  33   1  259.37   30.90
   5 -33  -1  104.09   19.30
   5  33  -1   45.50   19.60
  -5  33   1   88.29   21.60
   4 -33  -1   -8.40   15.00
   4  33  -1   16.20   18.10
  -4  33   1  -13.50   16.30
   3 -33  -1   56.69   20.80
  -3  33   1   85.09   20.80
   3  33  -1   76.89   21.40
   2  33  -1  125.09   23.20
  -2  33   1   86.59   21.30
   1 -33  -1   83.59   18.30
   1  33  -1   53.29   19.80
  -1  33   1   75.99   20.80
   0 -33  -1  301.47   25.30
   0  33  -1  281.27   31.00
   0  33   1  261.57   30.20
   1  33   1  147.59   22.90
  -1  33  -1  165.68   24.70
  -2  33  -1   22.20   19.30
   2  33   1    5.00   17.70
   3 -33   1   86.99   17.90
  -3  33  -1   91.29   21.20
   3  33   1   94.09   22.20
   4 -33   1   95.49   19.40
   4  33   1  116.49   22.20
  -4  33  -1   98.29   22.10
   5 -33   1   90.19   19.80
  -5  33  -1  121.59   23.10
   5  33   1   92.09   21.70
   6 -33   1  271.27   30.20
   6  33   1  277.07   31.80
  -6  33  -1  279.37   31.20
   7 -33   1  233.88   30.50
   7  33   1  241.88   32.60
  -7  33  -1  199.28   31.20
   8 -33   1   37.30   19.60
   8  33   1   44.50   22.50
  -8  33  -1   66.89   21.10
   9 -33   1  222.68   32.90
  -9  33  -1  234.58   31.60
   9  33   1  163.88   27.40
   9 -34  -1  126.09   23.40
  -9  34   1  198.38   32.00
   8 -34  -1  281.67   32.20
   8  34  -1  294.27   35.80
  -8  34   1  281.37   33.00
   7 -34  -1   52.79   19.70
  -7  34   1   62.19   20.90
   7  34  -1   38.00   21.00
   6 -34  -1  360.36   31.50
  -6  34   1  304.17   34.10
   6  34  -1  310.67   33.60
   5 -34  -1  221.38   27.20
  -5  34   1  214.58   30.30
   5  34  -1  191.48   27.20
   4 -34  -1  121.09   22.10
  -4  34   1  163.88   24.60
   4  34  -1  144.69   24.60
  -3  34   1   35.60   19.70
   3  34  -1   83.39   22.60
   2  34  -1  970.90   47.40
  -2  34   1  935.71   45.60
   1 -34  -1  201.98   25.00
  -1  34   1  215.18   29.10
   1  34  -1  177.78   29.20
   0  34   1   28.60   19.30
   0  34  -1   36.10   19.90
   1  34   1  745.93   41.10
  -1  34  -1  715.93   41.90
   2  34   1  106.39   22.20
  -2  34  -1   89.09   22.60
   3  34   1  -17.50   17.60
  -3  34  -1  -10.10   17.90
   4 -34   1  704.13   38.20
   4  34   1  687.13   40.00
  -4  34  -1  685.13   41.90
   5 -34   1   45.00   17.60
  -5  34  -1   45.80   19.70
   5  34   1   10.70   19.40
   6 -34   1   56.59   18.90
  -6  34  -1   83.49   21.60
   6  34   1   67.09   22.40
   7 -34   1  544.45   38.20
   7  34   1  426.26   37.70
  -7  34  -1  461.45   37.90
   8 -34   1   -0.10   18.70
  -8  34  -1   11.60   18.80
   8  34   1   23.20   21.30
   9 -34   1   48.50   21.50
   9  34   1   43.50   22.50
  -9  34  -1   95.29   22.90
   8 -35  -1  240.68   30.60
   8  35  -1  288.17   37.20
  -8  35   1  209.18   31.70
   7 -35  -1   31.10   18.20
  -7  35   1   15.60   18.80
   7  35  -1   42.00   23.70
   6 -35  -1  732.43   39.80
  -6  35   1  730.73   43.50
   6  35  -1  712.93   43.70
   5 -35  -1   25.70   19.50
  -5  35   1   11.10   18.20
   5  35  -1   -1.20   19.10
   4  35  -1  134.39   24.20
  -4  35   1  114.99   22.50
   3  35  -1    6.30   19.60
  -3  35   1    4.50   19.10
   2  35  -1  285.77   33.10
  -2  35   1  326.87   32.90
   1  35  -1  253.37   32.90
  -1  35   1  335.67   33.80
   0  35   1 1637.94   63.09
   0  35  -1 1891.71   66.49
   1  35   1   51.19   20.50
  -1  35  -1   61.19   22.30
  -2  35  -1  247.28   32.20
   2  35   1  256.47   31.40
   3  35   1  -19.00   17.80
  -3  35  -1    0.40   18.90
   4  35   1   39.90   20.90
  -4  35  -1   38.60   19.90
   5 -35   1  206.68   31.40
   5  35   1  254.67   30.80
  -5  35  -1  182.78   26.30
   6 -35   1  709.83   40.80
  -6  35  -1  644.54   41.50
   7 -35   1   44.10   20.10
  -7  35  -1   96.99   22.80
   7  35   1   41.90   21.60
   8 -35   1   15.60   19.60
   8  35   1   13.90   21.40
  -8  35  -1   55.19   21.20
   7 -36  -1   57.29   20.20
   7  36  -1   35.40   22.90
  -7  36   1   26.80   20.60
   6  36  -1  155.98   26.70
  -6  36   1  121.59   24.20
   5  36  -1   88.79   23.30
  -5  36   1  122.09   23.70
   4  36  -1   62.99   22.00
  -4  36   1   38.00   20.10
   3  36  -1    2.60   20.50
  -3  36   1   36.50   20.80
   2 -36  -1  662.83   47.50
  -2  36   1  631.44   41.70
   2  36  -1  613.84   41.50
   1  36  -1  -31.20   17.70
  -1  36   1   24.90   18.90
   0  36   1  362.26   34.30
   0  36  -1  391.26   35.30
  -1  36  -1  157.88   27.00
   1  36   1  225.28   31.40
   2  36   1   -8.10   18.00
  -2  36  -1   13.90   19.60
  -3  36  -1   24.50   20.20
   3  36   1   32.50   20.40
   4  36   1  671.03   42.10
  -4  36  -1  616.74   42.00
   5  36   1  -14.50   19.50
  -5  36  -1   26.60   20.00
   6 -36   1   36.60   24.20
  -6  36  -1   37.20   19.70
   6  36   1   16.20   20.90
   7 -36   1  255.27   31.50
   7  36   1  312.07   36.00
  -7  36  -1  212.68   33.40
  -6  37   1   57.49   21.40
   6  37  -1   38.30   23.00
  -5  37   1   96.99   23.60
   5  37  -1  121.79   25.80
  -4  37   1  167.78   26.60
   4  37  -1  272.37   34.70
   3  37  -1   43.70   21.90
  -3  37   1   -8.10   18.50
   2  37  -1   37.90   21.10
  -2  37   1   31.60   20.60
  -1  37   1  -25.50   18.10
   1  37  -1   23.60   20.20
   0  37  -1   29.20   22.00
   0  37   1   85.59   23.30
  -1  37  -1   -7.80   19.70
   1  37   1  -15.30   19.00
   2  37   1   90.29   24.20
  -2  37  -1  115.19   24.10
  -3  37  -1    1.00   20.10
   3  37   1   27.40   20.30
  -4  37  -1   62.09   21.80
   4  37   1   79.79   22.90
  -5  37  -1  124.79   24.30
   5  37   1  114.89   24.60
   4  38  -1   13.00   21.10
  -4  38   1    2.70   19.80
  -3  38   1   24.10   21.10
   3  38  -1   21.80   23.20
   2  38  -1   15.40   22.20
  -2  38   1    4.50   20.10
  -1  38   1  153.08   27.00
   1  38  -1  200.08   33.30
   0  38   1  111.49   25.60
   0  38  -1   50.69   22.90
  -1  38  -1   72.29   23.00
   1  38   1   61.59   23.40
  -2  38  -1   40.10   22.20
   2  38   1   45.70   22.30
  -3  38  -1  -11.20   19.80
   3  38   1   19.50   21.40
  19   0  -2  -13.90   19.90
 -19   0   2    2.30   22.60
 -18   0   2  583.04   41.30
  18   0  -2  523.05   40.90
  17   0  -2   19.10   19.90
 -17   0   2    7.10   19.60
 -16   0   2  364.76   33.40
  16   0  -2  338.57   32.60
  15   0  -2  457.65   32.80
 -15   0   2  456.85   32.50
 -14   0   2 1056.49   43.90
  14   0  -2 1140.29   44.00
  13   0  -2    4.80   14.20
 -13   0   2   -1.70   14.10
 -12   0   2  412.16   26.40
  12   0  -2  461.45   27.00
 -11   0   2   12.90   11.70
  11   0  -2   19.40   11.80
  10   0  -2 1727.73   49.10
 -10   0   2 1645.94   48.40
   9   0  -2  223.28   17.40
  -9   0   2  225.58   18.40
   8   0  -2 4643.24  105.29
  -8   0   2 4451.65  105.59
   8   0  -2 4654.93  103.79
  -7   0   2    5.70    8.80
  -7   0   2  -18.80    8.30
   7   0  -2   -2.10    8.10
   6   0  -2 1083.49   30.90
  -6   0   2 1102.79   31.90
  -5   0   2  102.89   11.00
   5   0  -2  107.59   11.60
  -5   0   2   83.49   12.40
  -4   0   2 3483.45   77.19
   4   0  -2 3380.86   76.59
  -4   0   2 3436.66   76.79
  -3   0   2  175.88   11.30
   3   0  -2  178.68   10.70
   3   0  -2  182.38   11.00
  -3   0   2  186.98   11.20
  -2   0   2 9823.32  205.48
  -2   0   2 9855.71  206.08
   2   0  -2 9713.43  205.38
   2   0  -2 9832.72  205.48
   2   0  -2 9608.74  205.98
   1   0  -2 6898.31  148.09
   1   0  -2 6780.82  148.39
   1   0  -2 7169.08  147.09
  -1   0   2 7137.09  148.19
   0   0  -2 4203.38   91.49
   0   0  -2 4241.28   91.79
   0   0   2 4321.77   91.89
  -1   0  -2   63.99    8.40
   2   0   2 7475.45  156.08
  -2   0  -2 7358.06  156.08
  -2   0  -2 7228.78  153.38
   2   0   2 7117.79  153.28
  -3   0  -2   -2.60    5.30
  -3   0  -2   -7.70    6.60
   3   0   2    1.10    6.10
   3   0   2    6.10    6.90
  -4   0  -2   49.10    8.70
   4   0   2   59.89    9.20
   4   0   2   36.40    8.30
  -4   0  -2   61.99    9.70
  -5   0  -2 2174.38   53.19
  -5   0  -2 2098.19   50.69
   5   0   2 2182.38   52.99
   5   0   2 2130.79   50.89
  -6   0  -2 1054.89   32.20
  -6   0  -2 1044.90   30.20
   6   0   2 1080.89   30.80
  -7   0  -2   34.40   10.00
  -7   0  -2   25.20    8.40
  -8   0  -2  472.45   20.90
  -8   0  -2  441.46   22.50
  -9   0  -2  212.68   17.70
  -9   0  -2  229.38   19.40
 -10   0  -2 1896.61   54.99
 -10   0  -2 1829.92   51.69
 -11   0  -2 2321.27   65.59
  11   0   2 2245.68   66.09
 -11   0  -2 2356.46   62.69
  12   0   2   -0.20   14.70
 -12   0  -2   27.80   14.00
 -12   0  -2   27.60   15.40
  13   0   2   23.40   16.60
 -13   0  -2  -10.10   14.70
  14   0   2  328.87   30.90
 -14   0  -2  283.97   28.70
  15   0   2  376.06   33.20
 -15   0  -2  351.86   31.80
  16   0   2   16.30   19.50
 -16   0  -2    8.20   18.90
  17   0   2  905.11   50.09
 -17   0  -2 1017.80   53.89
  18   0   2   21.10   23.20
 -18   0  -2  -10.70   22.20
 -19  -1   2   27.40   25.00
  19  -1  -2   13.50   22.00
  19   1  -2   22.50   21.90
 -19   1   2   32.40   25.30
 -18  -1   2  322.57   38.30
  18  -1  -2  402.66   38.00
 -18   1   2  334.47   38.20
  18   1  -2  448.96   38.60
 -17  -1   2   92.39   23.70
  17  -1  -2  130.99   24.40
 -17   1   2  109.09   23.60
  17   1  -2  106.59   23.00
  16  -1  -2   66.59   20.20
 -16  -1   2   15.10   18.70
  16   1  -2   31.30   19.20
 -16   1   2   14.40   18.20
  15  -1  -2   17.80   17.30
 -15  -1   2   15.80   17.10
  15   1  -2   30.80   17.00
 -15   1   2    7.10   16.80
  14  -1  -2  744.13   36.90
 -14  -1   2  733.43   36.20
 -14   1   2  702.93   35.60
  14   1  -2  658.83   35.40
  13  -1  -2   70.79   16.40
 -13  -1   2   37.60   15.80
 -13   1   2   55.19   15.80
  13   1  -2   94.49   16.90
  12  -1  -2 2175.18   62.49
 -12  -1   2 2071.39   61.69
  12   1  -2 2148.39   61.09
 -12   1   2 2212.88   61.99
 -11  -1   2  537.75   27.30
  11  -1  -2  532.15   26.90
 -11   1   2  500.35   26.50
  11   1  -2  504.65   25.60
  10  -1  -2   73.69   13.20
 -10  -1   2   58.49   12.40
 -10   1   2   54.79   12.30
  10   1  -2  129.49   16.20
   9  -1  -2   51.79   11.30
  -9  -1   2   72.09   12.30
  -9   1   2   54.29   11.40
   9   1  -2   55.09   10.90
  -8  -1   2 1785.52   48.80
   8  -1  -2 1778.12   48.40
   8   1  -2 1769.72   46.00
   8   1  -2 1901.31   47.90
  -8   1   2 1813.62   48.80
  -7  -1   2  697.53   24.40
  -7  -1   2  740.63   26.00
   7  -1  -2  751.62   25.70
   7   1  -2  767.52   25.10
  -7   1   2  774.72   26.20
  -7   1   2  764.02   26.30
   7   1  -2  761.22   24.10
   6  -1  -2 1929.31   48.70
  -6  -1   2 1894.61   49.00
   6   1  -2 2094.89   50.09
   6   1  -2 1935.31   47.80
  -6   1   2 1928.51   49.00
  -5  -1   2  683.23   22.50
   5  -1  -2  653.33   21.70
  -5  -1   2  664.53   20.90
  -5   1   2  659.23   21.20
   5   1  -2  662.73   20.90
  -5   1   2  649.54   21.80
   4  -1  -2  616.54   19.80
  -4  -1   2  562.04   19.90
  -4  -1   2  630.94   19.30
  -4   1   2  624.24   20.00
  -4   1   2  582.04   19.60
   4   1  -2  594.94   18.80
   3  -1  -2 2017.50   45.60
  -3  -1   2 1974.50   45.80
   3  -1  -2 1974.60   45.90
  -3  -1   2 1974.50   45.30
  -3   1   2 1970.70   46.00
   3   1  -2 1940.01   45.10
   3   1  -2 1933.71   45.60
  -3   1   2 1951.80   45.60
   2  -1  -2 4585.44   98.39
   2  -1  -2 4575.44   97.49
  -2  -1   2 4537.25   97.99
   2  -1  -2 4550.94   97.89
  -2  -1   2 4616.64   97.19
   2   1  -2 4535.35   97.09
   2   1  -2 4532.35   97.99
   2   1  -2 4562.94   97.79
  -2   1   2 4504.15   97.39
  -1  -1   2 1365.66   31.10
  -1  -1   2 1347.87   31.70
   1  -1  -2 1344.27   30.00
   1  -1  -2 1317.27   31.50
   1  -1  -2 1362.96   32.00
  -1   1   2 1351.76   31.50
   1   1  -2 1352.06   31.00
   1   1  -2 1361.36   31.80
  -1   1   2 1340.77   30.00
   0  -1  -2 5626.24  121.39
   0  -1   2 5747.73  121.19
   0  -1  -2 5752.62  121.39
   0   1  -2 5549.34  120.99
   0   1   2 5760.72  121.49
  -1  -1  -2 6247.08  135.69
   1  -1   2 6379.46  133.59
   1   1   2 6482.45  135.89
  -1   1  -2 6151.68  133.49
   1   1   2 6504.55  135.99
  -1   1  -2 6387.36  135.79
  -2  -1  -2 1225.48   28.60
   2  -1   2 1258.07   29.40
  -2  -1  -2 1242.08   31.80
  -2   1  -2 1264.57   31.90
   2   1   2 1254.87   28.70
   2   1   2 1318.67   32.00
  -2   1  -2 1262.47   29.30
  -3  -1  -2  237.98   10.40
  -3  -1  -2  216.68   13.30
   3  -1   2  233.58   11.50
   3  -1   2  246.18   14.20
  -3   1  -2  232.48   11.00
   3   1   2  234.98   11.90
  -3   1  -2  243.98   13.80
   3   1   2  250.27   13.10
  -4  -1  -2 3185.58   72.69
  -4  -1  -2 3255.07   74.89
   4  -1   2 3323.57   75.49
   4  -1   2 3317.67   73.39
   4   1   2 3381.76   75.29
  -4   1  -2 3229.18   73.19
  -4   1  -2 3289.57   75.49
   4   1   2 3289.37   73.09
   5  -1   2  665.73   21.70
   5  -1   2  741.13   24.90
  -5  -1  -2  643.64   20.70
  -5  -1  -2  649.24   22.60
  -5   1  -2  671.03   23.10
   5   1   2  638.94   21.30
  -5   1  -2  626.44   21.10
   5   1   2  644.34   22.50
  -6  -1  -2   10.70    7.70
  -6  -1  -2    5.80    8.60
   6  -1   2   10.90    8.90
  -6   1  -2   14.50    8.60
   6   1   2    9.80    8.70
  -6   1  -2    8.70    7.70
  -7  -1  -2  216.68   16.60
  -7  -1  -2  233.48   15.10
  -7   1  -2  243.78   16.60
  -7   1  -2  192.48   14.80
   7   1   2  218.08   20.20
  -8  -1  -2  729.13   26.00
  -8  -1  -2  763.92   28.50
  -8   1  -2  724.33   26.40
  -8   1  -2  749.23   28.50
  -9  -1  -2  488.15   22.80
  -9  -1  -2  514.95   25.00
  -9   1  -2  529.35   25.40
  -9   1  -2  499.85   23.20
 -10  -1  -2  572.04   26.20
 -10  -1  -2  580.34   28.30
 -10   1  -2  591.34   26.70
 -10   1  -2  652.83   29.50
 -11  -1  -2   13.80   13.20
  11  -1   2   18.80   14.30
 -11  -1  -2    2.50   11.80
 -11   1  -2   28.40   13.90
 -11   1  -2   -0.50   11.70
  11   1   2   10.00   14.10
 -12  -1  -2   89.59   17.80
 -12  -1  -2   94.79   16.10
  12  -1   2  107.09   18.20
 -12   1  -2   79.79   15.90
  12   1   2   76.49   17.20
 -13  -1  -2  688.53   34.20
  13  -1   2  701.13   38.40
 -13   1  -2  771.42   35.40
  13   1   2  700.03   37.40
  14  -1   2  986.50   46.50
 -14  -1  -2  997.90   42.00
 -14   1  -2 1020.20   42.50
  14   1   2 1037.40   45.30
  15  -1   2  822.72   44.60
 -15  -1  -2  862.61   44.50
 -15   1  -2  778.82   41.20
  15   1   2  783.52   42.90
  16  -1   2  383.96   36.00
 -16  -1  -2  360.56   33.90
  16   1   2  360.96   34.60
 -16   1  -2  396.06   34.30
  17  -1   2   98.59   24.50
 -17  -1  -2   56.69   25.20
 -17   1  -2   80.19   23.60
  17   1   2  102.19   24.00
  18  -1   2    1.70   22.30
  18   1   2    7.90   21.60
 -18   1  -2    4.60   22.40
  19  -2  -2   27.50   22.30
  19   2  -2   13.80   20.60
 -19   2   2   13.50   24.60
 -18  -2   2   97.49   26.30
  18  -2  -2  103.59   25.10
  18   2  -2  123.99   25.10
 -18   2   2   58.19   23.10
  17  -2  -2   35.20   21.00
 -17  -2   2   30.90   20.30
 -17   2   2   65.99   23.10
  17   2  -2   96.99   22.40
 -16  -2   2  464.25   35.20
  16  -2  -2  401.26   34.90
  16   2  -2  438.66   34.20
 -16   2   2  480.45   35.50
 -15  -2   2   22.10   17.80
  15  -2  -2   19.30   17.70
 -15   2   2    5.50   16.60
  15   2  -2   26.40   17.40
 -14  -2   2  114.19   20.00
  14  -2  -2  163.18   25.70
 -14   2   2  125.79   19.90
  14   2  -2  127.79   19.40
 -13  -2   2  377.36   28.00
  13  -2  -2  440.06   29.60
  13   2  -2  471.75   28.20
 -13   2   2  435.66   28.50
 -12  -2   2  428.36   27.20
  12  -2  -2  549.05   29.20
  12   2  -2  533.05   27.20
 -12   2   2  464.05   27.50
 -11  -2   2   50.49   13.30
  11  -2  -2   48.30   13.50
  11   2  -2   59.79   13.10
 -11   2   2   33.80   12.60
 -10  -2   2 1032.00   36.50
  10  -2  -2 1116.19   37.60
  10   2  -2 1132.89   35.70
 -10   2   2 1114.39   37.10
  -9  -2   2  149.99   17.00
   9  -2  -2  178.48   17.40
   9   2  -2  192.58   16.60
  -9   2   2  187.28   17.10
  -8  -2   2  748.13   25.70
   8  -2  -2  711.13   26.70
  -8  -2   2  697.53   27.00
   8   2  -2  704.93   23.90
  -8   2   2  709.43   26.60
   8   2  -2  729.13   25.30
   7  -2  -2 2266.37   57.69
  -7  -2   2 2336.27   58.19
   7   2  -2 2298.37   54.79
  -7   2   2 2304.37   57.99
   7   2  -2 2362.16   56.19
  -6  -2   2   24.10    8.90
   6  -2  -2   25.40    8.60
  -6  -2   2   48.40    8.10
  -6   2   2   46.80    9.00
   6   2  -2   32.10    8.10
   6   2  -2   43.80    9.50
  -6   2   2   36.20    8.90
  -5  -2   2   10.10    7.80
   5  -2  -2   16.00    7.70
  -5  -2   2   13.60    7.30
  -5   2   2   19.00    7.60
  -5   2   2   23.80    8.20
   5   2  -2    8.50    6.60
  -4  -2   2 3821.62   84.29
  -4  -2   2 3926.61   85.79
   4  -2  -2 3759.02   85.69
  -4   2   2 3866.71   87.29
  -4   2   2 3866.21   85.49
   4   2  -2 3787.02   84.09
  -3  -2   2 1161.08   29.00
   3  -2  -2 1163.88   30.10
   3  -2  -2 1236.08   29.80
  -3   2   2 1176.18   29.70
   3   2  -2 1136.99   28.70
  -2  -2   2  494.45   13.70
  -2  -2   2  491.75   15.10
   2  -2  -2  508.35   14.70
   2  -2  -2  480.65   15.70
  -2   2   2  485.75   14.70
   2   2  -2  482.95   13.50
   2   2  -2  477.35   14.80
   1  -2  -2  654.03   18.40
   1  -2  -2  657.13   16.30
   1  -2  -2  668.23   18.30
  -1  -2   2  677.33   18.20
  -1  -2   2  671.03   17.20
  -1   2   2  644.24   16.40
   1   2  -2  664.63   17.00
   1   2  -2  657.33   17.90
  -1   2   2  680.33   18.80
   0  -2  -2   -1.90    4.80
   0  -2  -2   -3.40    4.80
   0  -2   2    7.70    4.70
   0   2   2    2.90    4.80
   0   2  -2    0.00    4.60
   0   2   2   14.20    5.50
  -1  -2  -2  180.58   10.20
   1  -2   2  187.88    8.90
   1   2   2  204.28   10.70
  -1   2  -2  177.88    8.10
  -1   2  -2  188.88   10.50
   1   2   2  166.98   10.50
   2  -2   2  469.05   14.40
  -2  -2  -2  464.05   12.90
  -2  -2  -2  458.65   16.20
  -2   2  -2  460.95   14.20
  -2   2  -2  469.85   16.70
   2   2   2  493.75   16.40
   2   2   2  448.36   13.20
  -3  -2  -2   63.89   10.30
  -3  -2  -2   34.90    5.80
   3  -2   2   39.50    7.50
   3  -2   2   67.29    8.90
   3   2   2   40.90    7.00
   3   2   2   56.69    8.30
  -3   2  -2   50.99    8.30
  -3   2  -2   35.80    6.20
   4  -2   2   14.20    8.50
   4  -2   2   14.50    8.30
  -4  -2  -2   -6.40    5.90
  -4  -2  -2    3.30    7.40
   4   2   2   -5.80    7.50
   4   2   2    7.50    7.90
  -4   2  -2   -1.80    6.30
  -4   2  -2   13.40    7.80
   5  -2   2 1551.44   39.10
  -5  -2  -2 1529.95   40.20
  -5  -2  -2 1482.15   38.00
   5   2   2 1553.94   40.20
   5   2   2 1542.45   38.40
  -5   2  -2 1544.05   38.80
  -5   2  -2 1544.65   41.10
  -6  -2  -2  131.09   13.80
  -6  -2  -2  115.99   12.40
   6  -2   2  124.29   14.20
   6   2   2  116.49   13.60
  -6   2  -2  117.39   13.60
  -6   2  -2  116.79   12.50
  -7  -2  -2  288.27   17.70
  -7  -2  -2  272.77   16.10
  -7   2  -2  250.17   17.30
  -7   2  -2  274.37   16.40
   7   2   2  271.07   21.60
  -8  -2  -2  388.86   19.50
  -8  -2  -2  366.76   20.80
  -8   2  -2  384.46   21.40
  -8   2  -2  391.96   19.70
  -9  -2  -2  135.99   17.60
  -9  -2  -2  159.88   16.70
  -9   2  -2  180.38   18.70
  -9   2  -2  163.88   17.10
  10  -2   2  219.68   22.00
 -10  -2  -2  205.18   20.40
 -10  -2  -2  179.28   18.80
 -10   2  -2  172.78   18.90
 -10   2  -2  222.28   21.10
 -11  -2  -2  665.73   31.50
  11  -2   2  613.94   32.80
 -11  -2  -2  697.13   30.00
  11   2   2  640.14   32.00
 -11   2  -2  736.43   30.30
 -11   2  -2  691.43   32.30
 -12  -2  -2  178.68   23.70
  12  -2   2  199.78   24.90
 -12  -2  -2  194.08   22.30
 -12   2  -2  197.28   22.50
  12   2   2  184.28   23.90
 -13  -2  -2   74.29   17.40
  13  -2   2   79.59   19.60
 -13   2  -2   70.29   16.80
  13   2   2   76.99   18.30
 -14  -2  -2   76.19   18.80
  14  -2   2   58.99   20.80
  14   2   2  116.99   20.90
 -14   2  -2   64.89   18.20
  15  -2   2   64.09   20.70
 -15  -2  -2   63.99   19.80
 -15   2  -2   74.59   20.30
  15   2   2  117.79   21.70
  16  -2   2  106.89   23.90
 -16  -2  -2   94.09   22.90
  16   2   2  111.99   22.90
 -16   2  -2  112.59   23.60
  17  -2   2  209.78   34.40
 -17   2  -2  176.18   26.60
  17   2   2  227.28   33.10
  18  -2   2  -16.10   21.10
 -18   2  -2   10.30   22.50
  18   2   2    0.10   20.60
  19  -3  -2  231.98   37.10
 -19   3   2  217.88   32.90
  19   3  -2  236.28   37.40
  18  -3  -2  296.37   36.20
  18   3  -2  294.17   35.50
 -18   3   2  231.78   34.50
  17  -3  -2   40.90   21.90
 -17   3   2   52.49   22.40
  17   3  -2   67.49   20.20
 -16  -3   2   78.39   21.30
  16  -3  -2   45.30   19.90
 -16   3   2   63.19   20.30
  16   3  -2   50.09   18.90
 -15  -3   2   38.50   18.40
  15  -3  -2   -9.10   16.10
  15   3  -2    4.90   16.10
 -15   3   2   60.29   18.20
  14  -3  -2  110.79   19.80
 -14  -3   2   69.69   18.50
 -14   3   2  126.49   19.90
  14   3  -2   99.39   18.80
 -13  -3   2   56.09   16.30
  13  -3  -2   64.19   16.00
 -13   3   2   41.60   15.40
  13   3  -2   77.39   16.10
  12  -3  -2  294.97   25.00
 -12  -3   2  253.97   23.40
  12   3  -2  247.38   22.90
 -12   3   2  274.27   23.30
  11  -3  -2  366.26   24.70
 -11  -3   2  369.76   24.40
  11   3  -2  407.76   23.20
 -11   3   2  390.26   24.30
  10  -3  -2  355.46   22.80
 -10  -3   2  357.16   22.10
  10   3  -2  381.06   21.10
 -10   3   2  349.96   21.90
   9  -3  -2  222.98   18.40
  -9  -3   2  217.58   18.50
   9   3  -2  213.68   16.90
   9   3  -2  220.08   16.00
  -9   3   2  211.48   17.70
  -8  -3   2  361.86   20.50
   8  -3  -2  396.56   20.60
  -8  -3   2  371.46   18.70
  -8   3   2  396.46   19.90
   8   3  -2  399.16   18.70
   8   3  -2  384.36   17.30
  -7  -3   2 3197.38   76.19
   7  -3  -2 3254.37   76.59
  -7   3   2 3208.48   75.79
   7   3  -2 3171.58   72.19
   7   3  -2 3114.39   73.49
  -6  -3   2    5.10    7.00
   6  -3  -2    0.40    7.60
  -6  -3   2   -2.90    8.20
   6   3  -2   -7.40    7.90
   6   3  -2    2.10    6.50
   6   3  -2   11.80    7.00
  -6   3   2   -9.20    7.40
  -6   3   2   -3.90    7.90
   5  -3  -2   72.29   11.90
  -5  -3   2   74.19   12.40
  -5  -3   2  114.09   10.80
   5   3  -2  106.99   10.50
  -5   3   2  105.69   12.20
   4  -3  -2  185.58   13.30
  -4  -3   2  190.78   11.10
   4   3  -2  187.68   11.20
  -4   3   2  197.78   12.60
   3  -3  -2  584.94   19.30
   3  -3  -2  612.44   18.40
  -3  -3   2  604.94   17.50
  -3   3   2  554.74   18.20
   3   3  -2  580.94   17.10
   3   3  -2  578.44   15.30
  -2  -3   2  208.78   10.30
   2  -3  -2  226.58   11.70
   2  -3  -2  211.28   10.20
  -2  -3   2  203.08    8.40
   2   3  -2  197.38    8.40
  -2   3   2  212.08   11.90
   2   3  -2  215.28   10.10
  -2   3   2  226.58   10.50
   1  -3  -2  256.17    9.20
   1  -3  -2  280.57   11.60
  -1  -3   2  254.17    9.50
   1  -3  -2  266.77   11.30
  -1  -3   2  257.87   11.00
  -1   3   2  274.47   12.10
   1   3  -2  263.67    9.50
  -1   3   2  254.47    9.40
   1   3  -2  265.37   10.70
   0  -3  -2  942.11   24.30
   0  -3   2  937.61   23.30
   0  -3  -2  930.91   23.90
   0   3   2  916.01   21.10
   0   3   2  938.81   24.10
   0   3  -2  950.80   23.50
   0   3   2  961.30   24.40
   1  -3   2  133.69    9.80
  -1  -3  -2  104.89    9.40
  -1  -3  -2  119.69    9.60
   1  -3   2  126.09    9.70
  -1   3  -2  116.69    8.30
   1   3   2  114.49   10.50
   1   3   2  111.39   10.80
  -1   3  -2  131.39   10.20
   2  -3   2  155.98   10.50
  -2  -3  -2  149.88   11.00
  -2   3  -2  157.68   11.60
   2   3   2  159.38    8.20
   2   3   2  166.48   11.30
  -2   3  -2  136.29    9.20
   3  -3   2  309.37   14.30
  -3  -3  -2  303.87   14.30
  -3   3  -2  299.87   13.10
  -3   3  -2  300.17   15.20
   3   3   2  299.47   12.90
   3   3   2  307.27   14.90
  -4  -3  -2  122.59   12.10
   4  -3   2  110.39   12.60
   4  -3   2  120.39   13.20
  -4  -3  -2  117.89   10.30
  -4   3  -2  133.19   12.60
   4   3   2  112.19   12.80
  -4   3  -2  136.39   11.00
   4   3   2  128.79   11.90
   5  -3   2  679.03   22.60
  -5  -3  -2  707.43   23.30
  -5  -3  -2  682.63   21.40
  -5   3  -2  666.43   24.10
   5   3   2  689.93   22.00
   5   3   2  735.73   23.40
  -5   3  -2  681.53   22.50
  -6  -3  -2   80.69   10.70
  -6  -3  -2   92.49   12.00
   6  -3   2   83.69   10.90
   6   3   2   96.39   13.20
  -6   3  -2  103.19   13.90
  -6   3  -2   97.69   12.50
  -7  -3  -2   47.90    9.30
  -7  -3  -2   38.20   10.30
  -7   3  -2   51.19    9.50
  -7   3  -2   64.99   11.20
   7   3   2   59.99   10.90
  -8  -3  -2   -0.10    8.80
  -8  -3  -2   -2.60    9.60
  -8   3  -2    5.20    9.20
  -8   3  -2    5.10   10.10
  -9  -3  -2  436.36   23.70
  -9  -3  -2  463.55   22.30
  -9   3  -2  427.86   22.20
  -9   3  -2  438.76   24.40
 -10  -3  -2  396.36   24.30
  10  -3   2  402.16   26.20
 -10  -3  -2  426.86   22.90
 -10   3  -2  400.96   23.30
 -10   3  -2  357.76   24.00
 -11  -3  -2   10.60   13.60
  11  -3   2   22.20   14.40
 -11  -3  -2   -2.40   12.20
 -11   3  -2   -1.90   11.60
  11   3   2   38.90   13.90
 -12  -3  -2  413.16   29.30
 -12  -3  -2  442.16   26.60
  12  -3   2  404.56   29.40
  12   3   2  431.96   28.50
 -12   3  -2  422.66   26.90
 -13  -3  -2   94.89   19.00
  13  -3   2   90.59   19.60
 -13  -3  -2   46.10   16.30
 -13   3  -2  101.89   17.70
  13   3   2   73.79   18.60
 -14  -3  -2  -35.50   14.40
  14  -3   2    5.80   18.60
 -14   3  -2   20.30   16.30
  14   3   2   11.40   16.40
 -15  -3  -2  -10.80   18.60
  15  -3   2   22.70   19.00
 -15   3  -2   17.90   18.70
  15   3   2  -15.60   16.20
  16  -3   2   91.99   24.30
 -16   3  -2   50.89   21.10
  16   3   2   67.79   22.40
  17  -3   2   33.70   22.40
  17   3   2   21.90   20.40
 -17   3  -2   57.39   22.40
  18  -3   2   30.60   24.50
  18   3   2   15.20   21.00
 -18   3  -2  -44.10   21.40
  19  -4  -2   22.70   22.60
 -19   4   2   43.50   25.60
  18  -4  -2  688.53   46.20
 -18   4   2  686.03   47.10
  18   4  -2  731.23   43.70
  17  -4  -2  140.19   25.50
  17   4  -2  136.59   23.30
 -17   4   2  148.39   24.40
  16  -4  -2   60.39   20.50
  16   4  -2   21.50   17.40
 -16   4   2   23.30   18.80
  15  -4  -2   98.49   21.00
  15   4  -2  120.99   20.40
 -15   4   2  118.09   20.80
  14  -4  -2   17.60   16.30
 -14  -4   2    2.60   16.30
 -14   4   2    9.60   15.70
  14   4  -2   37.80   15.90
 -13  -4   2  107.89   18.10
  13  -4  -2  113.09   19.30
 -13   4   2  170.58   22.90
  13   4  -2  142.29   22.60
  12  -4  -2  258.27   24.70
 -12  -4   2  286.47   24.80
 -12   4   2  297.87   23.70
  12   4  -2  334.47   23.80
 -11  -4   2 1348.47   44.40
  11  -4  -2 1347.77   45.70
  11   4  -2 1382.26   42.40
 -11   4   2 1395.36   44.40
 -10  -4   2  405.06   23.70
  10  -4  -2  381.36   23.70
  10   4  -2  417.66   21.50
 -10   4   2  427.26   23.40
   9  -4  -2  627.54   27.20
  -9  -4   2  670.73   27.20
   9   4  -2  602.54   22.60
   9   4  -2  643.54   24.30
  -9   4   2  650.33   26.30
  -8  -4   2  678.63   26.80
  -8  -4   2  676.13   23.60
   8  -4  -2  715.53   27.40
  -8   4   2  709.03   26.40
   8   4  -2  690.43   22.70
   8   4  -2  704.83   24.10
  -7  -4   2    3.60    6.70
  -7  -4   2   -4.00    8.70
   7  -4  -2   20.90    8.90
   7   4  -2    5.80    7.10
   7   4  -2   -5.00    7.70
  -7   4   2   12.70    8.80
   6  -4  -2 4430.96  104.09
  -6  -4   2 4772.12  101.49
  -6   4   2 4709.63  105.09
  -6   4   2 4597.14  103.69
   6   4  -2 4595.44   99.49
   6   4  -2 4453.45  100.59
  -5  -4   2  617.04   19.60
   5  -4  -2  634.74   22.50
   5   4  -2  699.63   25.80
  -5   4   2  673.63   22.40
   5   4  -2  649.14   19.40
   4  -4  -2  125.89   12.80
  -4  -4   2  147.89   10.00
   4   4  -2  140.89   10.10
  -4   4   2  142.39   12.30
  -3  -4   2 5449.15  116.49
   3  -4  -2 5447.35  118.89
   3  -4  -2 5553.74  118.09
  -3   4   2 5458.75  117.99
   3   4  -2 5330.57  116.39
   3   4  -2 5498.25  114.79
   2  -4  -2 2851.21   62.89
   2  -4  -2 2807.92   64.09
  -2  -4   2 2859.71   60.99
  -2  -4   2 2908.61   62.59
   2   4  -2 2789.92   62.29
   2   4  -2 2799.82   60.79
  -2   4   2 2778.42   62.79
  -2   4   2 2985.00   64.49
   1  -4  -2 1064.89   25.30
   1  -4  -2 1077.79   27.30
  -1  -4   2 1053.59   25.10
   1  -4  -2 1074.69   27.30
  -1  -4   2 1055.79   26.30
   1   4  -2 1085.49   25.20
  -1   4   2 1098.69   27.40
  -1   4   2 1036.40   25.30
   0  -4   2 6274.87  131.59
   0  -4  -2 6240.78  130.19
   0  -4  -2 6227.18  132.09
   0  -4  -2 6213.68  132.49
   0   4   2 6044.50  129.99
   0   4   2 6163.58  131.99
   0   4   2 6285.17  132.49
   0   4  -2 6013.10  131.39
   1  -4   2 1479.25   35.40
  -1  -4  -2 1460.05   35.70
  -1  -4  -2 1469.35   35.20
   1  -4   2 1519.05   35.60
   1   4   2 1463.25   35.80
   1   4   2 1431.66   35.10
  -1   4  -2 1515.05   35.70
  -1   4  -2 1456.05   34.90
  -2  -4  -2   92.49   10.20
   2  -4   2   76.39   10.10
  -2   4  -2   74.19    9.10
   2   4   2   84.09   10.20
   2   4   2   81.69    9.60
  -2   4  -2   79.99   11.10
   3  -4   2  249.78   13.60
  -3  -4  -2  274.17   13.40
   3   4   2  232.28   11.60
  -3   4  -2  239.28   12.40
  -3   4  -2  274.87   14.30
   3   4   2  269.97   13.70
   4  -4   2   33.30    8.30
  -4  -4  -2   38.60    8.00
   4  -4   2   41.30   10.20
   4   4   2   47.60    7.90
  -4   4  -2   35.60    7.40
   4   4   2   48.10    8.20
  -4   4  -2   36.90    8.60
   5  -4   2   92.69   13.50
  -5  -4  -2  119.69   12.90
  -5   4  -2  110.39   12.20
  -5   4  -2   79.09   12.80
   5   4   2  101.99   12.50
   5   4   2   98.99   12.50
   6  -4   2 1331.77   35.60
  -6  -4  -2 1261.57   35.20
  -6  -4  -2 1224.58   33.40
  -6   4  -2 1168.48   35.80
  -6   4  -2 1148.19   33.90
   6   4   2 1190.98   33.50
  -7  -4  -2   39.40    9.00
  -7  -4  -2   57.39   10.40
   7   4   2   38.40   11.90
  -7   4  -2   33.00   10.30
  -7   4  -2   20.30    9.10
  -8  -4  -2    3.70    9.00
  -8  -4  -2   11.70    9.90
  -8   4  -2   16.30   10.20
  -8   4  -2    2.30    9.30
  -9  -4  -2 1227.98   37.10
  -9  -4  -2 1220.68   39.10
  -9   4  -2 1228.28   40.40
  -9   4  -2 1153.78   37.60
  10  -4   2   37.30   13.90
 -10  -4  -2   53.99   13.70
 -10  -4  -2   46.80   12.60
 -10   4  -2   69.29   13.10
 -10   4  -2   67.09   14.20
 -11  -4  -2  158.08   21.10
 -11  -4  -2  108.29   15.80
  11  -4   2  134.49   19.20
  11   4   2  127.89   20.80
 -11   4  -2  118.39   19.60
  12  -4   2  162.38   21.30
 -12  -4  -2  123.89   18.80
 -12  -4  -2  126.99   21.00
  12   4   2  122.29   18.10
 -12   4  -2  104.09   16.90
 -13  -4  -2   -4.10   15.30
  13  -4   2  -13.40   16.00
 -13  -4  -2    8.80   16.40
  13   4   2  -22.00   13.50
 -13   4  -2  -15.60   13.70
  14  -4   2  172.08   25.00
  14   4   2  129.59   21.90
 -14   4  -2  223.08   26.10
  15  -4   2  482.25   37.20
  15   4   2  518.45   34.50
 -15   4  -2  460.15   34.90
  16  -4   2   79.09   21.90
 -16   4  -2   16.90   19.90
  16   4   2   18.90   19.00
  17  -4   2  183.08   28.70
  17   4   2  215.58   33.30
 -17   4  -2  236.78   36.50
  18  -4   2  170.98   29.20
 -18   4  -2  138.79   27.70
  19  -5  -2  475.55   42.40
 -19   5   2  482.45   45.40
  18  -5  -2  287.47   37.70
 -18   5   2  306.37   36.00
  18   5  -2  366.06   35.70
  17  -5  -2   43.70   22.10
  17   5  -2   78.79   21.90
 -17   5   2   38.00   21.90
  16  -5  -2  117.49   23.50
  16   5  -2  154.48   22.30
 -16   5   2   79.19   21.10
  15  -5  -2   35.00   18.90
 -15   5   2   32.10   17.90
  15   5  -2   72.29   18.00
  14  -5  -2    6.10   15.90
 -14   5   2   19.30   15.70
  14   5  -2   34.90   16.00
  13  -5  -2 1860.31   61.49
  13   5  -2 1920.91   57.19
 -13   5   2 2008.50   59.89
  12  -5  -2  460.35   28.70
 -12   5   2  476.45   27.50
  12   5  -2  478.35   26.20
  11  -5  -2  613.94   30.40
 -11   5   2  643.34   29.30
  11   5  -2  622.44   27.00
  10  -5  -2    8.20   10.90
  10   5  -2    3.90   10.10
 -10   5   2    0.60    9.60
  10   5  -2   -6.90   11.60
   9  -5  -2   77.39   13.20
  -9   5   2   64.99   11.90
   9   5  -2   65.29   10.80
   9   5  -2   51.29   10.10
   8  -5  -2 2266.47   62.59
   8   5  -2 2462.05   58.29
   8   5  -2 2461.85   56.79
  -8   5   2 2489.85   61.89
  -7  -5   2 1428.16   35.60
   7  -5  -2 1293.67   39.30
   7   5  -2 1363.86   33.90
  -7   5   2 1350.36   38.80
   7   5  -2 1374.16   35.50
  -6  -5   2   22.10    7.20
   6  -5  -2   21.10    8.90
  -6   5   2   39.60    9.20
   6   5  -2   29.40    7.20
   6   5  -2   26.20    6.10
  -5  -5   2  511.55   16.60
   5  -5  -2  497.65   20.00
  -5   5   2  509.25   19.90
   5   5  -2  505.45   20.30
   5   5  -2  524.25   16.40
   5   5  -2  509.55   14.90
  -4  -5   2   15.80    6.00
   4  -5  -2   16.70    8.00
   4   5  -2   21.70    5.90
  -4   5   2   14.00    7.60
  -3  -5   2  437.56   14.00
   3  -5  -2  415.96   15.90
   3  -5  -2  443.76   17.40
  -3   5   2  469.45   18.00
   3   5  -2  425.76   14.00
  -3   5   2  415.66   16.10
   2  -5  -2  520.85   16.20
   2  -5  -2  502.75   17.40
  -2  -5   2  485.45   12.90
  -2  -5   2  475.55   15.10
  -2   5   2  495.75   18.00
   2   5  -2  487.45   14.80
  -2   5   2  481.25   16.10
  -1  -5   2 4625.54   98.89
   1  -5  -2 4632.04   98.39
   1  -5  -2 4680.03   99.79
   1  -5  -2 4622.94  100.29
  -1  -5   2 4550.94   97.69
   1   5  -2 4531.55   97.79
  -1   5   2 4443.46   98.29
  -1   5   2 4638.74   99.89
   0  -5  -2  628.94   19.10
   0  -5  -2  625.84   18.40
   0  -5   2  617.74   17.50
   0   5  -2  607.54   17.60
   0   5   2  585.24   16.40
   0   5   2  609.64   19.50
   0   5   2  599.64   19.00
  -1  -5  -2  576.44   17.50
   1  -5   2  573.14   17.80
   1  -5   2  570.44   18.60
  -1  -5  -2  546.45   18.10
  -1   5  -2  556.94   18.10
   1   5   2  565.14   17.70
  -1   5  -2  565.84   17.70
   1   5   2  562.74   18.10
  -2  -5  -2   88.69   10.20
   2  -5   2  103.49   11.40
  -2   5  -2   99.59    9.80
   2   5   2   97.59   10.10
   2   5   2   83.59   10.40
  -2   5  -2   80.79   11.10
  -3  -5  -2   -0.10    6.40
   3  -5   2   -3.90    7.10
  -3   5  -2  -10.30    5.90
  -3   5  -2   -1.20    6.80
   3   5   2    2.60    5.90
   3   5   2   -6.50    6.10
   4  -5   2 3720.03   82.29
  -4  -5  -2 3647.64   82.19
  -4   5  -2 3500.75   83.29
   4   5   2 3715.43   82.19
   4   5   2 3646.34   80.49
  -4   5  -2 3575.14   81.99
  -5  -5  -2 2776.82   65.19
   5  -5   2 2818.32   65.59
   5   5   2 2763.72   63.79
   5   5   2 2829.82   65.09
  -5   5  -2 2719.03   66.79
  -5   5  -2 2690.03   64.89
  -6  -5  -2   56.49   10.00
  -6   5  -2   55.49    9.40
   6   5   2   51.09    9.30
  -6   5  -2   54.29   10.30
  -7  -5  -2  447.56   20.30
  -7   5  -2  440.26   20.30
  -7   5  -2  425.26   21.90
  -8  -5  -2   32.70   10.70
  -8   5  -2   29.70   10.90
  -8   5  -2   15.10   10.20
  -9  -5  -2  304.07   20.80
  -9   5  -2  260.57   19.60
  -9   5  -2  286.57   21.40
 -10  -5  -2  968.20   35.50
  10  -5   2  940.51   38.10
 -10   5  -2  949.21   34.50
 -11  -5  -2  269.77   23.30
  11  -5   2  295.67   26.00
 -11   5  -2  271.87   22.40
  11   5   2  249.38   24.00
  12  -5   2  141.59   20.70
 -12  -5  -2  128.29   18.70
  12   5   2  185.38   24.30
 -12   5  -2  134.19   22.30
 -13  -5  -2  115.89   20.10
  13  -5   2  163.38   23.20
  13   5   2  120.69   20.00
 -13   5  -2  131.99   19.10
  14  -5   2   16.90   18.00
  14   5   2   18.40   17.10
 -14   5  -2   14.30   16.20
  15  -5   2  182.48   26.00
 -15   5  -2  142.19   23.10
  15   5   2  175.98   28.20
  16  -5   2  712.03   44.70
  16   5   2  718.33   41.80
 -16   5  -2  716.73   42.30
  17  -5   2   87.29   24.60
 -17   5  -2   82.99   23.70
  17   5   2   87.29   23.40
  18  -5   2   84.89   26.90
 -18   5  -2   79.49   25.70
  19  -6  -2   66.29   24.80
 -19   6   2   25.60   25.30
  18  -6  -2  102.89   25.00
 -18   6   2  114.99   26.90
  17  -6  -2  413.56   38.20
  17   6  -2  431.36   35.00
 -17   6   2  410.76   36.10
  16  -6  -2  554.94   38.40
  16   6  -2  531.35   34.90
 -16   6   2  550.84   37.20
  15  -6  -2   18.00   17.20
  15   6  -2   53.49   17.60
 -15   6   2   32.20   18.20
  14  -6  -2  726.33   38.40
 -14   6   2  695.23   35.50
  14   6  -2  716.63   33.80
  13  -6  -2  486.55   31.90
  13   6  -2  468.05   27.40
 -13   6   2  460.65   29.10
  12  -6  -2  722.63   35.00
  12   6  -2  698.13   30.50
 -12   6   2  734.73   32.80
  11  -6  -2  397.66   25.60
 -11   6   2  372.76   24.10
  11   6  -2  359.06   21.70
  10  -6  -2  731.63   31.30
  10   6  -2  711.93   26.60
  10   6  -2  677.23   24.80
 -10   6   2  689.23   29.20
   9  -6  -2  100.29   13.60
   9   6  -2  133.49   14.30
   9   6  -2  117.49   13.50
  -9   6   2  116.59   15.90
   8  -6  -2  178.48   17.30
   8   6  -2  178.48   14.10
   8   6  -2  181.38   13.20
  -8   6   2  190.18   16.80
  -7  -6   2   39.80    7.90
   7  -6  -2   49.20   10.50
   7   6  -2   43.30    7.30
  -7   6   2   48.00    9.80
   7   6  -2   46.90    8.30
  -6  -6   2  513.45   17.10
   6  -6  -2  493.25   21.40
  -6   6   2  520.45   21.10
   6   6  -2  487.65   15.30
   6   6  -2  522.55   17.00
   5  -6  -2   14.60    8.30
  -5  -6   2    7.70    6.00
   5   6  -2    8.90    5.80
   5   6  -2   16.60    8.50
  -5   6   2    9.60    7.90
   4  -6  -2 1744.23   44.00
  -4  -6   2 1677.13   39.50
  -4   6   2 1711.23   42.90
   4   6  -2 1748.82   39.70
  -4   6   2 1794.32   44.40
   3  -6  -2  470.25   17.90
   3  -6  -2  443.86   16.50
  -3  -6   2  458.25   14.10
  -3   6   2  448.96   17.10
  -3   6   2  466.45   19.20
   3   6  -2  456.15   14.20
  -2  -6   2 4818.12  103.69
   2  -6  -2 4837.52  106.09
  -2  -6   2 4856.71  102.09
   2  -6  -2 4934.71  105.19
  -2   6   2 4720.13  104.79
  -2   6   2 4854.41  106.09
   1  -6  -2  141.29   11.80
  -1  -6   2  156.68    8.60
   1  -6  -2  182.18   11.50
   1  -6  -2  173.18    9.90
  -1   6   2  159.68   10.00
  -1   6   2  159.48   12.60
   1   6  -2  128.09    8.60
   0  -6  -2 4263.97   92.79
   0  -6   2 4249.57   91.49
   0  -6  -2 4174.28   91.99
   0   6   2 4302.37   92.89
   0   6   2 4274.07   90.99
   0   6  -2 4110.89   91.29
   0   6   2 4194.08   91.89
   1  -6   2  807.02   23.40
  -1  -6  -2  789.82   21.70
  -1  -6  -2  749.33   22.50
   1  -6   2  805.22   22.20
  -1   6  -2  763.12   22.30
   1   6   2  787.22   21.60
  -1   6  -2  818.32   22.70
   1   6   2  765.62   22.50
   2  -6   2   91.29   11.20
   2  -6   2   85.09   13.20
  -2  -6  -2   97.39   10.30
   2   6   2   78.69   12.00
   2   6   2   83.49   10.30
  -2   6  -2   96.69   10.20
  -2   6  -2   81.49   11.10
  -3  -6  -2 1231.78   32.30
   3  -6   2 1266.07   33.50
   3   6   2 1253.07   31.50
   3   6   2 1247.58   32.70
  -3   6  -2 1261.17   33.70
  -3   6  -2 1235.18   32.60
   4  -6   2  948.71   28.20
  -4  -6  -2  993.40   27.90
  -4   6  -2  973.50   29.30
   4   6   2  976.80   27.50
   4   6   2 1003.40   26.80
  -4   6  -2  954.60   27.90
  -5  -6  -2 1606.04   41.20
   5  -6   2 1568.04   42.00
   5   6   2 1576.04   40.00
  -5   6  -2 1600.14   41.40
  -5   6  -2 1555.74   42.80
   5   6   2 1642.94   41.30
  -6  -6  -2  899.41   28.30
   6   6   2  926.61   31.50
   6   6   2  876.61   27.40
  -6   6  -2  896.91   30.00
  -6   6  -2  887.01   28.40
  -7  -6  -2  238.98   16.30
  -7   6  -2  240.18   17.50
  -7   6  -2  199.98   16.00
  -8  -6  -2 1215.48   36.50
  -8   6  -2 1145.59   38.00
  -8   6  -2 1131.09   35.70
  -9  -6  -2  400.76   22.10
  -9   6  -2  395.46   21.80
  10  -6   2   24.30   13.60
 -10  -6  -2   -0.70   11.90
 -10   6  -2   17.20   11.80
  11  -6   2  442.56   29.50
 -11  -6  -2  455.55   27.10
  11   6   2  446.96   27.70
 -11   6  -2  440.96   25.60
  12  -6   2  159.68   25.40
 -12  -6  -2  164.88   23.10
  12   6   2  186.68   23.90
 -12   6  -2  142.99   21.10
 -13  -6  -2   67.19   17.80
  13  -6   2   69.99   18.90
 -13   6  -2   29.00   15.70
  13   6   2   55.59   17.90
  14  -6   2   45.70   20.40
  14   6   2   73.49   19.80
 -14   6  -2   69.79   18.40
  15  -6   2   64.49   21.70
 -15   6  -2   96.39   21.20
  15   6   2   78.69   20.80
  16  -6   2   41.80   20.60
 -16   6  -2   45.70   20.90
  16   6   2   24.80   20.60
  17  -6   2  327.87   38.60
 -17   6  -2  284.37   36.00
  18  -6   2    0.90   22.20
 -18   6  -2  -35.00   20.80
  19  -7  -2   10.30   22.10
 -19   7   2   47.30   24.70
  18  -7  -2  296.47   37.10
 -18   7   2  338.07   37.00
  17  -7  -2   34.90   21.20
 -17   7   2   60.29   21.50
  17   7  -2   62.49   21.40
  16  -7  -2   43.50   20.40
 -16   7   2   33.80   18.40
  16   7  -2   45.30   18.00
  15  -7  -2   24.50   18.10
  15   7  -2   -1.70   16.10
 -15   7   2    0.50   15.60
  14  -7  -2  147.89   22.20
  14   7  -2  167.78   22.80
 -14   7   2  115.09   19.50
  13  -7  -2   19.10   15.80
 -13   7   2   36.60   15.80
  13   7  -2   42.30   15.00
  12  -7  -2   86.49   17.20
 -12   7   2  122.49   20.20
  12   7  -2  118.59   19.20
  11  -7  -2   72.09   15.20
 -11   7   2   88.79   14.70
  11   7  -2   75.99   13.20
  10  -7  -2  404.66   24.60
  10   7  -2  384.86   20.40
  10   7  -2  397.36   19.10
 -10   7   2  404.86   23.40
   9  -7  -2  166.08   18.10
  -9   7   2  127.59   16.10
   9   7  -2  142.49   14.40
   9   7  -2  164.28   14.90
   8  -7  -2  510.85   24.40
  -8   7   2  540.35   23.80
   8   7  -2  557.04   18.40
   8   7  -2  524.65   19.70
  -7  -7   2  192.38   11.90
   7  -7  -2  196.18   16.60
   7   7  -2  167.78   12.30
   7   7  -2  208.38   11.30
  -7   7   2  197.48   16.00
  -6  -7   2  862.81   23.20
   6  -7  -2  824.72   28.50
   6   7  -2  846.92   23.10
  -6   7   2  858.21   27.70
   5  -7  -2   25.30    8.90
   5  -7  -2   22.80    8.40
   5   7  -2   19.40    5.90
  -5   7   2    8.50   12.00
  -5   7   2   22.30    8.20
   4  -7  -2    6.10    7.60
  -4   7   2  -10.30    8.50
  -4   7   2    3.60    7.10
   4   7  -2   -0.20    4.90
  -3  -7   2 1082.09   26.30
   3  -7  -2 1161.18   29.60
   3  -7  -2 1071.79   30.50
  -3   7   2 1084.69   29.50
   3   7  -2 1080.99   26.20
  -3   7   2 1091.49   31.80
   2  -7  -2   30.30    6.70
   2  -7  -2   24.70    7.50
  -2  -7   2   19.10    5.70
  -2   7   2   23.90    7.00
  -2   7   2   41.30    8.70
  -1  -7   2  133.49    8.10
   1  -7  -2  112.79   11.10
   1  -7  -2  127.99   10.10
   1   7  -2  120.39    8.70
  -1   7   2  109.89   10.40
  -1   7   2  137.09   12.10
   0  -7  -2    6.10    6.80
   0  -7   2   18.70    5.70
   0  -7  -2   11.00    6.90
   0   7   2    8.50    7.00
   0   7  -2   25.80    6.20
   0   7   2   26.00    6.30
   1  -7   2   18.70    6.20
  -1  -7  -2    8.50    6.90
  -1  -7  -2   15.50    6.20
  -1   7  -2    5.60    6.50
   1   7   2    6.40    7.10
   1   7   2   11.50    7.50
  -1   7  -2   16.20    6.80
   2  -7   2  441.86   17.80
   2  -7   2  398.76   15.80
  -2  -7  -2  490.45   16.90
   2   7   2  467.85   16.70
  -2   7  -2  436.26   17.40
  -2   7  -2  451.55   16.80
   2   7   2  457.65   15.30
   3  -7   2 1012.70   31.60
  -3  -7  -2  977.00   27.50
   3  -7   2 1031.60   29.30
  -3   7  -2  990.60   28.10
  -3   7  -2  947.61   28.60
   3   7   2  981.20   27.60
   3   7   2  989.60   26.10
   4  -7   2  318.77   16.80
  -4  -7  -2  295.17   14.90
   4   7   2  293.27   14.80
  -4   7  -2  292.87   16.70
   4   7   2  326.07   13.80
  -4   7  -2  318.47   15.70
   4   7   2  275.37   14.60
  -5  -7  -2  119.89   12.70
   5   7   2  149.19   13.10
  -5   7  -2  128.49   14.30
   5   7   2  136.99   12.80
  -5   7  -2  119.59   13.40
  -6  -7  -2  402.26   18.50
  -6   7  -2  418.26   20.40
   6   7   2  418.56   19.20
  -6   7  -2  414.46   19.30
   6   7   2  385.16   18.90
  -7  -7  -2  196.08   15.60
  -7   7  -2  169.58   16.50
  -7   7  -2  186.08   15.80
  -8  -7  -2    8.00   10.00
  -8   7  -2   16.70    9.70
  -8   7  -2  -13.80    9.30
   9  -7   2 1716.13   52.59
  -9  -7  -2 1741.93   49.00
  -9   7  -2 1689.63   48.70
  10  -7   2  126.79   21.50
 -10  -7  -2  115.99   18.60
 -10   7  -2  122.29   18.60
 -11  -7  -2   90.99   16.10
  11  -7   2  115.29   19.10
  11   7   2  102.09   17.50
 -11   7  -2   98.39   15.70
  12  -7   2   90.29   19.60
 -12  -7  -2  133.09   22.20
 -12   7  -2   95.29   16.40
  12   7   2  118.09   18.80
  13  -7   2   76.09   20.30
 -13  -7  -2   58.89   17.00
 -13   7  -2   62.49   17.10
  13   7   2   69.89   17.90
  14  -7   2   -9.70   18.50
 -14  -7  -2   17.70   17.80
  14   7   2   15.20   18.20
 -14   7  -2  -13.70   15.50
  15  -7   2  304.87   34.00
  15   7   2  334.17   31.90
 -15   7  -2  305.87   31.20
  16  -7   2   25.70   20.60
  16   7   2   17.80   19.30
 -16   7  -2   26.70   19.20
  17  -7   2   33.30   23.10
 -17   7  -2   19.30   22.00
  18  -7   2   70.39   26.20
 -18   7  -2    3.10   23.20
  19  -8  -2  136.99   29.40
 -19   8   2  144.39   29.50
  18  -8  -2    1.80   20.50
 -18   8   2    0.00   21.30
  17  -8  -2  252.37   34.40
 -17   8   2  331.67   34.70
  16  -8  -2  387.16   35.40
 -16   8   2  403.26   33.10
  16   8  -2  364.96   30.30
  15  -8  -2   -4.80   16.60
  15   8  -2   31.90   16.90
 -15   8   2   21.60   17.20
  14  -8  -2   16.50   16.70
  14   8  -2   -3.00   14.40
 -14   8   2  -16.10   14.70
  13  -8  -2  124.49   20.20
  13   8  -2   79.59   15.80
 -13   8   2   91.39   17.20
  12  -8  -2  380.36   28.90
  12   8  -2  423.96   24.40
 -12   8   2  435.46   26.70
  11  -8  -2   12.30   12.70
  11   8  -2    6.00   11.10
  11   8  -2   22.40   11.30
 -11   8   2   21.90   12.90
  10  -8  -2  974.20   37.20
  10   8  -2  964.20   29.20
  10   8  -2  991.50   31.00
 -10   8   2 1032.20   35.70
   9  -8  -2  524.75   26.00
  -9   8   2  530.15   24.60
   9   8  -2  513.45   20.00
   9   8  -2  494.55   20.30
   8  -8  -2  292.97   20.00
   8   8  -2  304.57   15.60
   8   8  -2  309.27   13.80
  -8   8   2  313.87   19.40
   7  -8  -2  289.67   18.70
  -7  -8   2  285.17   13.10
   7   8  -2  283.57   13.60
  -7   8   2  288.37   18.00
   6  -8  -2  731.53   26.70
  -6   8   2  754.62   25.90
   5  -8  -2  351.36   18.20
  -5   8   2  389.76   17.90
   4  -8  -2 6262.37  146.09
   4  -8  -2 6601.34  146.89
  -4   8   2 6826.52  145.59
  -4   8   2 6975.10  147.19
   3  -8  -2  218.68   14.50
  -3  -8   2  238.08   10.00
  -3   8   2  224.88   13.40
  -3   8   2  235.78   16.00
  -2  -8   2 1068.79   26.20
   2  -8  -2 1062.69   28.50
   2  -8  -2 1061.69   29.30
  -2   8   2 1066.49   30.40
  -2   8   2 1049.59   28.50
  -1  -8   2  113.69    8.40
   1  -8  -2  135.29   10.60
   1  -8  -2  130.19   11.30
  -1   8   2  110.59   10.30
  -1   8   2  104.19   13.60
   1   8  -2  113.89    8.90
   0  -8  -2 5035.60  108.39
   0  -8  -2 5037.20  109.59
   0  -8   2 5044.20  107.99
   0   8  -2 4897.01  107.79
   0   8   2 5029.20  108.29
   0   8   2 5002.00  108.19
   0   8  -2 4919.61  110.09
   1  -8   2  104.99    9.80
  -1  -8  -2   99.09    9.70
  -1  -8  -2   96.29   11.20
  -1   8  -2   94.19   11.50
  -1   8  -2   92.99   10.60
   1   8   2   83.39   10.60
   1   8   2  104.59   11.70
  -2  -8  -2 5060.79  107.59
  -2  -8  -2 4842.72  108.89
   2  -8   2 4934.41  110.19
  -2   8  -2 4991.90  109.89
   2   8   2 4999.90  108.99
   2   8   2 5066.29  107.49
  -2   8  -2 4931.31  109.79
   3  -8   2 1165.08   32.00
   3  -8   2 1143.89   32.50
  -3  -8  -2 1178.68   31.10
  -3   8  -2 1124.19   32.50
  -3   8  -2 1165.58   32.00
   3   8   2 1202.38   29.40
   3   8   2 1171.28   31.00
   4  -8   2   -6.60    8.80
  -4  -8  -2   12.80    7.70
  -4   8  -2    2.80    7.30
   4   8   2   12.00    6.40
   4   8   2   -3.80    7.20
  -4   8  -2    3.10    7.90
  -5  -8  -2   28.20    8.30
   5   8   2   13.20    8.20
  -5   8  -2   26.70    8.70
   5   8   2   26.00    8.20
  -5   8  -2   49.20    9.70
  -6  -8  -2  559.94   21.20
   6   8   2  486.65   20.70
  -6   8  -2  523.95   23.20
   6   8   2  526.05   21.30
  -6   8  -2  520.25   21.70
  -7  -8  -2  318.57   18.10
  -7   8  -2  307.57   18.40
  -8  -8  -2  140.89   16.10
  -8   8  -2  139.99   16.70
   9  -8   2  192.98   20.90
  -9  -8  -2  190.18   18.40
  -9   8  -2  153.28   17.60
 -10  -8  -2  215.98   20.30
  10  -8   2  216.98   24.10
 -10   8  -2  194.38   19.80
  11  -8   2   21.60   14.40
 -11  -8  -2   30.60   14.40
 -11   8  -2   16.80   12.90
  11   8   2   37.70   15.40
 -12  -8  -2  329.17   26.30
  12  -8   2  288.67   29.10
  12   8   2  353.56   27.90
 -12   8  -2  392.56   26.80
  13  -8   2   52.59   18.30
 -13  -8  -2   25.60   16.20
  13   8   2    7.90   16.70
 -13   8  -2   16.60   14.90
  14  -8   2  287.27   32.70
 -14  -8  -2  259.07   28.10
  14   8   2  203.28   28.00
 -14   8  -2  264.57   28.40
  15  -8   2  123.49   24.30
  15   8   2  144.99   23.40
 -15   8  -2  186.78   30.00
  16  -8   2  140.39   25.40
 -16   8  -2  157.48   24.20
  17  -8   2   11.60   22.10
 -17   8  -2   -0.10   21.50
 -18   8  -2   72.19   24.90
  19  -9  -2  422.06   43.90
 -19   9   2  440.96   43.30
  18  -9  -2  -22.90   20.20
 -18   9   2   45.20   22.20
  17  -9  -2   22.10   21.00
 -17   9   2   38.30   20.50
  16  -9  -2  207.28   30.80
 -16   9   2  196.38   29.10
  15  -9  -2   39.70   19.00
  15   9  -2   -1.40   15.10
 -15   9   2    5.80   16.50
  14  -9  -2   83.59   20.50
  14   9  -2   56.89   16.30
 -14   9   2   60.59   17.60
  13  -9  -2 2282.07   69.89
 -13   9   2 2262.97   66.59
  13   9  -2 2140.69   59.89
  12  -9  -2  446.06   29.90
 -12   9   2  494.65   28.40
  12   9  -2  491.75   24.70
  11  -9  -2  132.09   21.10
 -11   9   2  147.59   20.10
  11   9  -2  137.99   14.70
  11   9  -2  131.39   17.00
  10  -9  -2  576.34   29.10
 -10   9   2  602.94   27.60
  10   9  -2  586.04   20.70
  10   9  -2  557.34   22.50
   9  -9  -2    8.90   10.40
   9   9  -2   13.60    7.50
  -9   9   2    2.70   10.20
   9   9  -2   -0.80    8.30
   8  -9  -2    0.90    9.40
  -8   9   2   -8.80    8.90
   7  -9  -2 4062.49   97.29
  -7   9   2 4088.69   95.69
   6  -9  -2 3529.85   84.29
  -6   9   2 3498.65   82.69
   5  -9  -2   11.50    8.70
  -5   9   2    5.20    8.00
   4  -9  -2  869.21   28.80
   4  -9  -2  982.70   28.40
  -4   9   2  926.21   28.10
  -4   9   2  986.50   30.10
   3  -9  -2 2099.09   51.49
  -3   9   2 2059.19   50.39
  -3   9   2 2098.09   51.89
  -2  -9   2  198.48   10.00
  -2  -9   2  172.58    8.00
   2  -9  -2  169.08   13.10
   2  -9  -2  169.28   11.30
  -2   9   2  195.38   12.40
  -2   9   2  187.68   14.80
  -1  -9   2 4535.55   97.09
   1  -9  -2 4412.26   99.29
   1  -9  -2 4490.75   99.09
  -1   9   2 4546.85   99.19
  -1   9   2 4578.24   99.39
   0  -9  -2 1511.65   36.90
   0  -9  -2 1504.45   38.00
   0  -9   2 1518.65   36.30
   0   9   2 1485.55   36.90
   0   9   2 1493.85   37.00
   0   9  -2 1474.85   38.80
  -1  -9  -2 1522.75   37.00
  -1  -9  -2 1498.15   38.50
   1  -9   2 1558.54   38.20
   1   9   2 1523.55   37.20
   1   9   2 1535.95   38.80
  -1   9  -2 1512.75   38.20
  -1   9  -2 1564.44   39.80
   1   9   2 1544.15   37.90
  -2  -9  -2    9.00    6.10
   2  -9   2    3.10    5.50
   2  -9   2   -0.40    8.70
  -2  -9  -2    2.20    7.00
   2   9   2   19.00    8.10
  -2   9  -2    3.80    7.40
   2   9   2   -0.90    6.20
  -2   9  -2   11.40    7.30
   3  -9   2  345.07   16.40
  -3  -9  -2  311.27   14.90
   3  -9   2  339.67   17.50
   3   9   2  328.67   13.60
  -3   9  -2  343.47   16.90
   3   9   2  343.27   15.30
  -3   9  -2  306.87   16.00
  -4  -9  -2 1022.80   29.50
  -4   9  -2 1025.20   31.40
   4   9   2 1065.09   29.50
   4   9   2 1040.20   27.40
  -4   9  -2 1052.39   30.80
  -5  -9  -2 3635.84   84.19
   5   9   2 3699.93   83.99
   5   9   2 3785.72   84.19
  -5   9  -2 3577.34   86.89
  -5   9  -2 3712.13   85.89
   5   9   2 3688.33   82.09
  -6  -9  -2 1280.87   35.80
   6   9   2 1250.27   36.30
  -6   9  -2 1230.48   36.90
   6   9   2 1318.77   36.20
  -7  -9  -2   93.89   14.00
  -7   9  -2   91.19   14.40
  -8  -9  -2  964.40   31.90
  -8   9  -2  950.80   32.90
  -9  -9  -2   20.00   11.70
   9  -9   2   21.80   12.60
  -9   9  -2    4.90   10.50
 -10  -9  -2  824.92   32.60
  10  -9   2  848.82   37.10
 -10   9  -2  806.52   32.90
 -11  -9  -2  217.18   21.40
  11  -9   2  194.88   24.90
  11   9   2  208.78   23.10
 -11   9  -2  192.48   21.20
 -12  -9  -2  557.74   30.00
  12  -9   2  542.65   34.90
  12   9   2  564.74   31.90
 -12   9  -2  532.65   30.80
  13  -9   2    6.80   17.50
 -13  -9  -2    5.50   15.10
  13   9   2   11.80   17.00
 -13   9  -2    7.30   14.70
 -14  -9  -2  407.16   30.40
  14  -9   2  372.96   34.80
  14   9   2  343.37   31.50
 -14   9  -2  360.26   30.60
  15  -9   2  145.99   25.10
 -15   9  -2  202.68   28.40
  15   9   2  126.49   26.20
  16  -9   2  472.25   40.90
 -16   9  -2  557.54   39.40
  17  -9   2   -7.70   23.00
 -17   9  -2   -4.20   20.10
  19 -10  -2   69.19   26.30
 -19  10   2   48.00   24.40
  18 -10  -2  113.39   27.40
 -18  10   2  138.89   26.50
  17 -10  -2  719.83   46.80
 -17  10   2  838.22   45.30
  16 -10  -2  190.68   31.20
 -16  10   2  200.68   30.60
  15 -10  -2  202.18   29.40
 -15  10   2  199.68   27.70
  15  10  -2  195.88   24.60
  14 -10  -2   73.99   20.20
 -14  10   2   64.69   17.70
  14  10  -2   99.19   16.50
  13 -10  -2   48.40   16.90
 -13  10   2   -1.60   13.50
  13  10  -2    3.40   13.00
  12 -10  -2  647.54   34.60
 -12  10   2  655.93   32.20
  12  10  -2  647.04   27.20
  11 -10  -2  378.96   27.40
 -11  10   2  435.26   25.50
  11  10  -2  415.96   21.50
  11  10  -2  434.86   18.80
  10 -10  -2  517.45   27.80
 -10  10   2  495.55   25.30
  10  10  -2  495.35   20.70
  10  10  -2  511.95   18.90
   9 -10  -2 2396.76   64.79
  -9  10   2 2323.87   62.19
   9  10  -2 2235.38   54.59
   8 -10  -2  134.19   16.90
  -8  10   2  116.79   15.90
   7 -10  -2   45.70   10.80
  -7  10   2   28.90   10.00
   6 -10  -2 1256.97   37.60
  -6  10   2 1214.38   36.30
   5 -10  -2  630.94   24.50
  -5  10   2  670.93   23.90
   4 -10  -2 2177.08   55.19
  -4  10   2 2216.38   59.39
  -4  10   2 2226.38   54.39
   3 -10  -2 1284.77   36.00
   3 -10  -2 1384.56   35.50
  -3  10   2 1270.27   36.30
  -3  10   2 1320.27   35.30
  -2 -10   2    2.40    4.30
   2 -10  -2  -16.70    5.40
   2 -10  -2    3.40    7.50
  -2  10   2    9.40    9.40
  -2  10   2    1.00    6.90
  -1 -10   2    8.90    5.20
   1 -10  -2   -4.90    6.30
   1 -10  -2   -1.50    6.80
  -1  10   2    9.00    9.10
  -1  10   2    5.80    7.00
   0 -10  -2 4488.75   97.29
   0 -10   2 4467.85   96.89
   0 -10  -2 4308.47   98.39
   0  10   2 4432.46   97.89
   0  10  -2 4335.67   99.59
   0  10   2 4522.35   97.29
  -1 -10  -2   12.50    6.50
   1 -10   2   16.20    6.00
  -1 -10  -2   17.30    7.50
  -1  10  -2   11.90    7.90
   1  10   2   17.10    7.20
   1  10   2   24.10    7.20
  -2 -10  -2  138.79   10.30
  -2 -10  -2  149.49   12.00
   2 -10   2  167.88   14.90
   2 -10   2  151.88   11.20
   2  10   2  124.49   11.10
  -2  10  -2  134.99   13.10
   2  10   2  127.09   12.30
  -3 -10  -2 3131.59   71.89
   3  10   2 3183.78   69.49
  -3  10  -2 3125.29   73.49
   3  10   2 3076.99   71.49
  -4 -10  -2  198.98   13.40
   4  10   2  185.58   11.60
   4  10   2  191.48   13.40
  -4  10  -2  181.68   14.60
  -5 -10  -2  135.99   13.40
   5  10   2  122.89   11.70
  -5  10  -2  123.99   13.80
   5  10   2  109.29   13.50
  -6 -10  -2 3926.71   91.09
   6  10   2 3995.10   91.19
   6  10   2 3988.80   88.49
  -6  10  -2 3940.81   93.19
  -7 -10  -2   85.09   14.20
  -7  10  -2   79.49   11.90
   8 -10   2   42.80   13.20
  -8 -10  -2   69.09   12.20
  -8  10  -2   61.59   11.90
   9 -10   2 1672.63   52.79
  -9 -10  -2 1627.94   47.30
  -9  10  -2 1649.23   49.40
 -10 -10  -2  356.36   23.10
  10 -10   2  320.67   26.40
 -10  10  -2  338.57   23.70
  11 -10   2   35.50   16.10
 -11 -10  -2   40.70   14.60
  11  10   2   30.80   15.10
 -11  10  -2   43.00   14.10
 -12 -10  -2  835.52   36.50
  12 -10   2  939.51   42.60
 -12  10  -2  891.71   37.00
  12  10   2  900.61   37.60
  13 -10   2   19.80   18.10
 -13 -10  -2   35.30   16.90
 -13  10  -2   18.60   15.60
  13  10   2   28.00   17.60
  14 -10   2   16.00   17.70
 -14 -10  -2    2.20   16.60
  14  10   2   -9.00   17.90
 -14  10  -2   -6.30   15.50
  15 -10   2  376.76   36.90
 -15  10  -2  456.95   34.40
  16 -10   2  283.87   36.50
 -16  10  -2  332.27   33.20
  17 -10   2    9.60   22.60
 -17  10  -2   19.80   21.30
  19 -11  -2  657.73   48.90
 -19  11   2  736.43   50.39
  18 -11  -2    0.80   21.90
 -18  11   2  -32.60   19.00
  17 -11  -2   94.99   24.80
 -17  11   2  104.09   22.90
  16 -11  -2   49.90   21.10
 -16  11   2    1.50   18.40
  15 -11  -2   21.30   18.30
 -15  11   2   23.80   17.20
  14 -11  -2   30.10   18.20
 -14  11   2  -18.00   14.20
  14  11  -2   11.50   14.20
  13 -11  -2  675.33   38.00
  13  11  -2  635.14   28.90
 -13  11   2  722.23   35.10
  12 -11  -2   74.99   17.60
  12  11  -2   42.50   12.50
 -12  11   2   52.19   14.90
  11 -11  -2  170.88   22.60
 -11  11   2  189.78   21.30
  11  11  -2  178.08   14.80
  10 -11  -2  275.47   22.90
  10  11  -2  240.68   13.90
 -10  11   2  246.88   20.80
   9 -11  -2    0.20   10.80
  -9  11   2   18.40   10.80
   8 -11  -2   26.20   11.10
  -8  11   2   23.90   10.30
   7 -11  -2 4459.25  107.39
  -7  11   2 4593.14  105.79
   6 -11  -2  305.77   19.10
  -6  11   2  335.47   18.70
   5 -11  -2 1997.50   52.19
  -5  11   2 1970.80   51.19
   4 -11  -2  298.77   17.40
  -4  11   2  332.47   16.80
   3 -11  -2   27.50    8.60
   3 -11  -2   22.50    7.80
  -3  11   2   11.90    7.70
  -3  11   2   29.60   10.00
   2 -11  -2  562.84   20.80
   2 -11  -2  556.14   20.00
  -2 -11   2  577.64   15.80
  -2  11   2  585.14   21.80
  -2  11   2  572.74   20.50
  -1 -11   2 3233.88   70.49
   1 -11  -2 3159.28   72.79
  -1  11   2 3175.48   72.89
  -1  11   2 3182.88   73.29
   0 -11  -2  137.79   12.10
   0 -11   2  128.89    9.90
   0 -11  -2  142.79   11.60
   0  11   2  144.89   12.20
   0  11  -2  132.99   13.70
   0  11   2  168.18   12.80
  -1 -11  -2   40.60    7.30
  -1 -11  -2   44.80    8.10
   1  11   2   40.00    7.80
   1  11   2   51.59    8.30
  -1  11  -2   35.40    8.80
   2 -11   2  923.01   27.00
  -2 -11  -2  892.41   26.50
  -2 -11  -2  896.61   24.20
   2  11   2  905.31   26.70
  -2  11  -2  912.91   28.30
   2  11   2  899.91   24.80
  -3 -11  -2   51.39    8.70
  -3  11  -2   67.29   10.10
   3  11   2   60.29    9.90
   3  11   2   75.39   12.30
  -4 -11  -2  334.67   16.50
  -4  11  -2  361.76   18.20
   4  11   2  359.16   16.70
  -5 -11  -2 3021.50   70.29
   5  11   2 2989.40   67.09
  -5  11  -2 2984.30   72.59
   5  11   2 2922.81   69.59
  -6 -11  -2 1393.86   38.30
   6  11   2 1366.96   35.30
  -6  11  -2 1363.56   40.40
   6  11   2 1390.56   40.40
  -7 -11  -2  691.03   25.60
  -7  11  -2  686.83   27.40
   7  11   2  712.93   23.40
   8 -11   2 1167.78   41.50
  -8 -11  -2 1176.08   36.60
  -8  11  -2 1173.18   38.30
   9 -11   2    8.90   12.70
  -9 -11  -2   39.90   12.30
  -9  11  -2   -0.40   10.90
 -10 -11  -2  954.90   34.50
  10 -11   2  899.51   39.50
 -10  11  -2  902.61   35.60
  11 -11   2  850.01   41.60
 -11 -11  -2  908.91   35.70
  11  11   2  918.61   35.90
 -11  11  -2  966.70   38.10
 -12 -11  -2  148.19   22.10
  12 -11   2  177.68   26.50
 -12  11  -2  140.29   22.50
  12  11   2  132.09   19.30
 -13 -11  -2   21.10   15.90
  13 -11   2   63.29   20.00
  13  11   2   45.30   18.20
 -13  11  -2   65.29   17.50
  14 -11   2  230.18   31.30
 -14 -11  -2  219.98   26.80
 -14  11  -2  243.28   28.30
  15 -11   2   15.60   19.60
 -15  11  -2   33.50   18.30
  16 -11   2  659.83   44.90
 -16  11  -2  662.63   42.90
  17 -11   2  137.79   29.00
 -17  11  -2  134.19   26.00
  18 -12  -2   16.50   21.40
 -18  12   2   41.90   22.40
  17 -12  -2  211.28   30.90
 -17  12   2  214.88   32.50
  16 -12  -2   14.70   19.60
 -16  12   2   -2.00   18.30
  15 -12  -2  748.53   42.60
 -15  12   2  785.02   41.40
  14 -12  -2   93.99   21.40
 -14  12   2   68.59   18.50
  13 -12  -2  -28.70   14.10
  13  12  -2   -4.60   12.40
 -13  12   2   -8.90   13.50
  12 -12  -2   93.69   19.40
 -12  12   2  109.99   17.00
  11 -12  -2  432.16   29.00
 -11  12   2  483.15   26.80
  10 -12  -2  106.39   16.80
 -10  12   2   71.19   13.90
   9 -12  -2  913.21   36.00
  -9  12   2  976.30   34.60
   8 -12  -2  218.78   19.40
  -8  12   2  210.78   18.60
   7 -12  -2  809.22   31.10
  -7  12   2  853.41   30.00
   6 -12  -2  288.47   18.60
  -6  12   2  300.87   18.30
   5 -12  -2 1233.68   36.70
  -5  12   2 1188.68   35.80
   4 -12  -2   -0.40    8.40
  -4  12   2   -2.60    7.50
   3 -12  -2 2869.81   69.39
  -3  12   2 2947.10   70.19
  -3  12   2 2925.01   69.29
   2 -12  -2  471.25   19.30
   2 -12  -2  482.75   19.30
  -2 -12   2  507.95   14.70
  -2  12   2  480.15   19.10
  -2  12   2  479.95   20.60
   1 -12  -2   60.49    8.80
   1 -12  -2   67.99   10.90
  -1 -12   2   64.69    8.80
  -1  12   2   71.69   11.40
  -1  12   2   64.29   10.30
   0 -12   2  495.75   16.80
   0 -12  -2  451.75   18.60
   0 -12  -2  459.05   17.40
   0  12   2  497.85   18.70
   0  12   2  473.05   18.70
   0  12  -2  473.05   20.40
  -1 -12  -2 1483.75   36.80
  -1 -12  -2 1455.15   38.60
  -1  12  -2 1512.25   40.70
   1  12   2 1525.25   37.10
   1  12   2 1466.65   39.00
  -2 -12  -2 1445.46   35.40
   2 -12   2 1470.15   39.10
  -2 -12  -2 1423.66   37.90
   2  12   2 1451.45   35.40
  -2  12  -2 1459.55   40.00
  -3 -12  -2  129.29   12.70
   3  12   2  128.99   13.10
  -3  12  -2  156.78   14.30
  -4 -12  -2  704.03   23.20
  -4  12  -2  722.53   25.70
   4  12   2  651.43   23.40
   4  12   2  668.23   20.30
  -5 -12  -2  418.46   18.70
   5  12   2  437.56   18.90
  -5  12  -2  402.26   20.30
  -6 -12  -2 1190.18   34.90
   6  12   2 1256.17   32.50
   6  12   2 1171.48   36.70
  -6  12  -2 1244.08   37.70
   7 -12   2  738.43   31.50
  -7 -12  -2  753.82   27.00
   7  12   2  735.43   23.50
  -7  12  -2  751.62   29.10
   8 -12   2   79.59   15.30
  -8 -12  -2   70.79   12.40
  -8  12  -2   65.89   12.80
   8  12   2   44.80    9.50
   9 -12   2  861.91   36.50
  -9 -12  -2  752.52   29.80
  -9  12  -2  775.32   32.20
  10 -12   2   87.59   17.50
 -10 -12  -2   66.49   14.00
  10  12   2   42.10   14.70
 -10  12  -2   54.69   14.60
 -11 -12  -2   56.79   15.20
  11 -12   2  105.29   19.30
 -11  12  -2   54.09   14.80
  11  12   2   60.79   16.30
 -12 -12  -2  117.69   18.00
  12 -12   2  139.79   22.40
  12  12   2  108.39   18.70
 -12  12  -2  164.38   23.80
 -13 -12  -2   60.99   17.20
  13 -12   2  110.49   21.90
  13  12   2   23.90   18.10
 -13  12  -2   93.59   18.70
 -14 -12  -2  391.26   30.60
  14 -12   2  403.66   35.70
 -14  12  -2  403.76   32.10
  15 -12   2  333.07   35.50
 -15  12  -2  272.27   30.50
  16 -12   2   92.29   25.30
 -16  12  -2   66.69   21.60
  17 -12   2  178.18   31.50
 -17  12  -2  186.48   28.70
  18 -13  -2   95.39   27.00
 -18  13   2  127.49   26.40
  17 -13  -2  238.18   35.40
 -17  13   2  221.18   32.70
  16 -13  -2  -15.30   19.00
 -16  13   2    0.30   18.20
  15 -13  -2  224.68   31.40
 -15  13   2  290.77   30.10
  14 -13  -2   56.09   19.50
 -14  13   2  105.59   20.30
  13 -13  -2   -1.20   14.80
 -13  13   2   26.60   15.30
  12 -13  -2  233.08   26.80
 -12  13   2  252.47   24.90
  11 -13  -2  502.25   30.80
 -11  13   2  545.95   28.60
  10 -13  -2   85.39   16.30
 -10  13   2  123.79   18.90
   9 -13  -2  320.97   23.70
  -9  13   2  347.97   22.70
   8 -13  -2    8.00   10.30
  -8  13   2    8.00    9.80
   7 -13  -2   11.50   10.00
  -7  13   2    5.80    9.10
   6 -13  -2    9.20    9.30
  -6  13   2    0.60    8.70
   5 -13  -2 2629.64   65.09
  -5  13   2 2488.45   63.59
   4 -13  -2  236.78   16.60
  -4  13   2  262.67   16.30
   3 -13  -2   92.29   13.40
  -3  13   2   83.29   12.70
  -2 -13   2  221.18   10.10
   2 -13  -2  212.88   14.80
  -2  13   2  208.68   14.80
  -2  13   2  229.38   17.40
  -1 -13   2  150.08   10.10
   1 -13  -2  160.78   13.00
  -1  13   2  151.48   15.80
  -1  13   2  150.18   13.30
   0 -13   2  160.08   10.50
   0 -13  -2  172.58   12.40
   0 -13  -2  178.28   13.80
   0  13  -2  160.68   14.40
   0  13   2  185.38   14.10
   0  13   2  161.48   14.50
  -1 -13  -2 3172.78   71.19
   1 -13   2 3152.88   72.79
  -1 -13  -2 3098.89   73.19
  -1  13  -2 3181.58   75.79
   1  13   2 3152.68   73.49
   1  13   2 3132.89   70.99
  -2 -13  -2 1006.80   29.30
  -2 -13  -2  994.40   26.70
   2  13   2 1005.80   27.00
  -2  13  -2 1020.50   31.70
  -3 -13  -2  109.39   12.80
   3  13   2  136.09   13.60
  -3  13  -2  135.99   14.50
  -4 -13  -2    6.40    8.20
  -4  13  -2   23.70    9.50
   4  13   2   24.60    9.10
  -5 -13  -2   -2.70    8.30
  -5  13  -2    8.60    9.10
   5  13   2   12.00    8.60
   6 -13   2   38.60   11.90
  -6 -13  -2   44.50   10.10
  -6  13  -2   49.90   11.00
   6  13   2   27.40   14.10
   7 -13   2  357.86   24.00
  -7 -13  -2  339.27   19.00
  -7  13  -2  351.46   21.60
  -8 -13  -2  356.26   20.40
   8 -13   2  349.17   25.10
  -8  13  -2  336.57   22.20
   9 -13   2   14.20   13.40
  -9 -13  -2    6.70   11.30
  -9  13  -2   22.90   11.90
   9  13   2   14.20   10.00
 -10 -13  -2  196.18   20.20
  10 -13   2  113.89   19.40
  10  13   2  188.98   21.50
 -10  13  -2  190.98   22.20
 -11 -13  -2   25.90   14.00
  11 -13   2   37.60   15.80
  11  13   2   27.40   15.00
 -11  13  -2   11.40   13.70
  12 -13   2   66.29   19.20
 -12 -13  -2   57.19   15.60
 -12  13  -2   98.79   17.80
  12  13   2  150.18   23.10
  13 -13   2  298.37   32.20
 -13 -13  -2  380.06   28.10
 -13  13  -2  394.66   29.90
  14 -13   2  328.87   35.50
 -14 -13  -2  353.56   29.20
 -14  13  -2  387.66   31.30
  15 -13   2   13.60   20.10
 -15  13  -2    2.30   17.70
  16 -13   2   -9.90   20.40
 -16  13  -2  -25.00   17.40
  17 -13   2   71.59   26.70
 -17  13  -2   29.30   21.70
  18 -14  -2  118.19   28.40
 -18  14   2  207.88   29.50
  17 -14  -2    7.00   20.30
 -17  14   2   18.50   19.50
  16 -14  -2  -12.20   18.60
 -16  14   2    8.70   18.30
  15 -14  -2  126.89   23.80
 -15  14   2  102.19   21.30
  14 -14  -2  160.78   24.60
 -14  14   2  145.79   22.00
  13 -14  -2   26.70   17.10
 -13  14   2   18.20   15.20
  12 -14  -2  243.48   26.80
 -12  14   2  216.88   24.00
  11 -14  -2  142.29   19.50
 -11  14   2  113.49   17.00
  10 -14  -2   70.39   15.90
 -10  14   2   34.20   12.80
   9 -14  -2   81.49   15.00
  -9  14   2   51.89   13.00
   8 -14  -2  953.70   36.40
  -8  14   2 1004.50   34.80
   7 -14  -2   68.39   13.40
  -7  14   2   63.19   11.70
   6 -14  -2 1679.43   48.10
  -6  14   2 1647.24   47.00
   5 -14  -2   14.40    9.30
  -5  14   2   -5.10    8.10
   4 -14  -2  166.28   15.50
  -4  14   2  164.48   15.10
   3 -14  -2  248.88   16.60
  -3  14   2  263.17   16.50
   2 -14  -2  498.35   20.40
  -2 -14   2  496.15   15.70
  -2  14   2  496.45   21.90
  -2  14   2  488.25   20.80
  -1 -14   2  920.21   24.90
   1 -14  -2  906.41   27.20
  -1  14   2  897.61   28.50
  -1  14   2  867.51   28.00
   0 -14  -2  347.27   15.90
   0 -14  -2  356.76   17.40
   0  14   2  382.56   18.20
   0  14  -2  369.36   19.20
   0  14   2  378.26   17.70
   1 -14   2  281.67   14.90
  -1 -14  -2  304.47   14.30
  -1 -14  -2  301.37   16.10
   1  14   2  289.87   16.30
  -1  14  -2  282.47   17.30
   1  14   2  287.47   15.60
  -2 -14  -2  509.65   20.10
  -2 -14  -2  542.25   17.60
   2  14   2  525.25   19.00
  -2  14  -2  556.24   22.90
  -3 -14  -2   25.30    8.80
  -3  14  -2   24.90    9.30
  -4 -14  -2   52.79    9.60
   4  14   2   57.09   10.20
  -4  14  -2   50.69   10.90
  -5 -14  -2 1190.68   34.00
   5 -14   2 1204.48   38.80
   5  14   2 1157.18   34.00
  -5  14  -2 1162.98   37.20
   6 -14   2  600.94   28.40
  -6 -14  -2  635.84   24.00
  -6  14  -2  622.54   26.30
   7 -14   2  190.78   21.10
  -7 -14  -2  206.58   16.80
  -7  14  -2  200.98   18.80
  -8 -14  -2   13.90   10.70
   8 -14   2   -9.80   12.40
  -8  14  -2   -7.50   10.60
  -9 -14  -2   14.50   12.30
   9 -14   2    4.40   14.10
  -9  14  -2  -12.80   11.00
 -10 -14  -2  301.97   22.00
  10 -14   2  318.57   28.10
 -10  14  -2  366.76   26.10
  11 -14   2  784.12   39.10
 -11 -14  -2  744.63   32.00
 -11  14  -2  727.83   35.20
 -12 -14  -2   18.70   14.60
  12 -14   2   27.10   17.50
 -12  14  -2   13.30   14.70
 -13 -14  -2   86.89   18.10
  13 -14   2  110.19   23.20
 -13  14  -2   63.09   17.60
  14 -14   2  -11.80   17.00
 -14  14  -2   22.20   17.10
  15 -14   2  203.78   29.90
 -15  14  -2  200.88   29.40
  16 -14   2  -30.20   19.80
 -16  14  -2    9.00   19.00
  17 -14   2  398.76   44.30
 -17  14  -2  423.96   37.90
  18 -15  -2   49.80   24.80
 -18  15   2   -8.30   20.80
  17 -15  -2   57.79   23.80
 -17  15   2   84.39   22.70
  16 -15  -2    1.90   18.90
 -16  15   2   -6.40   18.00
  15 -15  -2   52.19   20.10
 -15  15   2   37.50   18.20
  14 -15  -2   32.10   18.60
 -14  15   2   48.80   18.20
  13 -15  -2  206.98   28.00
 -13  15   2  169.98   25.30
  12 -15  -2  236.18   27.30
 -12  15   2  257.07   24.80
  11 -15  -2    0.50   13.60
 -11  15   2   -6.50   12.10
  10 -15  -2   88.89   17.00
 -10  15   2   64.99   14.90
   9 -15  -2    6.40   11.50
  -9  15   2   -0.60   10.70
   8 -15  -2  570.54   28.20
  -8  15   2  544.65   26.00
   7 -15  -2 1704.53   51.09
  -7  15   2 1769.62   49.99
   6 -15  -2  560.84   25.90
  -6  15   2  565.94   24.80
   5 -15  -2  835.02   30.50
  -5  15   2  869.71   30.10
   4 -15  -2  126.59   14.90
  -4  15   2  107.89   14.60
   3 -15  -2   12.30    8.70
  -3  15   2    1.90    8.40
   2 -15  -2 2873.81   68.99
  -2 -15   2 2911.31   64.79
  -2  15   2 2890.51   70.49
  -2  15   2 2846.72   69.99
  -1 -15   2  801.72   23.10
   1 -15  -2  809.42   25.70
  -1  15   2  814.12   27.50
  -1  15   2  809.62   27.20
   0 -15  -2  204.58   13.70
   0 -15  -2  202.28   15.00
   0  15   2  217.18   16.30
   0  15   2  229.28   15.60
   0  15  -2  232.18   16.40
  -1 -15  -2  412.16   18.70
  -1 -15  -2  451.85   17.30
   1 -15   2  462.55   18.90
   1  15   2  440.26   19.60
  -1  15  -2  426.26   21.10
   1  15   2  428.86   19.20
  -2 -15  -2   21.30    6.90
  -2 -15  -2   33.00    9.30
   2  15   2   23.40    8.40
  -2  15  -2   30.40    9.70
  -3 -15  -2  640.94   23.10
  -3  15  -2  653.53   25.80
   4 -15   2   18.30   10.30
  -4 -15  -2    2.70    8.70
   4  15   2   10.80    9.50
  -4  15  -2   39.00   10.40
  -5 -15  -2  522.05   21.40
   5 -15   2  520.65   25.50
  -5  15  -2  513.95   24.10
   5  15   2  488.45   23.00
   6 -15   2   31.40   12.20
  -6 -15  -2   11.60    9.90
  -6  15  -2   12.50   10.20
  -7 -15  -2  303.97   18.80
   7 -15   2  355.26   24.60
  -7  15  -2  355.46   22.50
   8 -15   2  106.69   18.00
  -8 -15  -2  124.49   16.30
  -8  15  -2   95.89   15.10
  -9 -15  -2  186.88   19.00
   9 -15   2  147.29   23.60
  -9  15  -2  180.08   21.00
  10 -15   2  959.10   42.00
 -10 -15  -2  932.11   34.10
 -10  15  -2  923.11   37.80
 -11 -15  -2   43.80   14.30
  11 -15   2   24.50   17.00
 -11  15  -2   18.80   14.40
 -12 -15  -2    1.10   14.10
  12 -15   2    5.90   17.10
 -12  15  -2   13.60   15.30
 -13 -15  -2   35.30   17.50
  13 -15   2    0.20   16.70
 -13  15  -2   -2.80   15.70
  14 -15   2   56.99   21.20
 -14  15  -2   65.49   19.30
  15 -15   2  163.48   27.70
 -15  15  -2  190.68   28.40
  16 -15   2  289.07   39.30
 -16  15  -2  311.57   34.80
  18 -16  -2   68.29   25.00
 -18  16   2   63.49   24.00
  17 -16  -2  147.29   27.50
 -17  16   2  207.58   33.00
  16 -16  -2    0.50   19.40
 -16  16   2   37.70   19.90
  15 -16  -2  463.95   37.30
 -15  16   2  518.45   36.60
  14 -16  -2   15.20   17.30
 -14  16   2  -20.20   13.80
  13 -16  -2   29.70   17.30
 -13  16   2   16.00   15.90
  12 -16  -2   27.70   15.90
 -12  16   2   15.20   13.90
  11 -16  -2  304.17   27.30
 -11  16   2  307.97   24.50
  10 -16  -2  234.18   24.30
 -10  16   2  233.18   23.00
   9 -16  -2  319.97   24.70
  -9  16   2  312.97   22.90
   8 -16  -2   91.89   15.30
  -8  16   2   66.79   13.00
   7 -16  -2   30.70   11.50
  -7  16   2    8.60   10.20
   6 -16  -2  709.33   29.00
  -6  16   2  677.13   28.00
   5 -16  -2  504.05   23.80
  -5  16   2  501.55   23.30
   4 -16  -2   33.20   10.20
  -4  16   2   31.10    9.90
   3 -16  -2 1301.47   38.50
  -3 -16   2 1297.07   31.60
  -3  16   2 1369.06   39.40
  -2 -16   2   44.90    7.30
  -2 -16   2   33.30    6.50
   2 -16  -2   38.30    9.30
  -2  16   2   50.19   10.20
   1 -16  -2  661.43   23.30
   1  16  -2  696.43   26.60
  -1  16   2  658.63   25.40
  -1  16   2  673.03   25.10
   0 -16  -2  701.23   23.10
   0 -16  -2  672.53   24.50
   0 -16   2  730.33   22.80
   0  16   2  684.63   25.70
   0  16   2  706.73   24.70
   0  16  -2  695.93   27.00
  -1 -16  -2 1366.46   38.50
  -1 -16  -2 1408.96   36.30
   1  16   2 1414.66   36.90
  -1  16  -2 1377.96   41.40
   1  16   2 1425.36   39.80
  -2 -16  -2  284.87   13.40
  -2 -16  -2  263.17   16.50
   2  16   2  264.07   15.60
   2  16   2  277.87   17.50
  -2  16  -2  291.87   18.80
   3 -16   2   48.90   11.40
  -3 -16  -2   38.60    9.70
  -3  16  -2   43.40   10.90
   4 -16   2  252.07   19.30
  -4 -16  -2  259.47   16.50
  -4  16  -2  252.97   18.70
   5 -16   2   31.30   12.10
  -5 -16  -2   17.50   10.20
  -5  16  -2   26.00   10.90
   5  16   2   16.50   12.00
   6 -16   2  807.62   33.90
  -6 -16  -2  940.21   29.90
  -6  16  -2  852.61   32.90
   7 -16   2  312.57   24.40
  -7 -16  -2  270.77   18.60
  -7  16  -2  325.87   22.30
  -8 -16  -2  217.48   18.00
   8 -16   2  172.78   22.80
  -8  16  -2  202.68   21.40
   9 -16   2   80.49   17.80
  -9 -16  -2  107.29   14.70
  -9  16  -2   82.09   16.10
  10 -16   2  -14.90   14.30
 -10 -16  -2    3.00   12.80
 -10  16  -2   -3.80   12.30
 -11 -16  -2   -9.20   12.90
  11 -16   2    9.40   15.80
 -11  16  -2    4.80   14.20
 -12 -16  -2   54.59   15.90
  12 -16   2   63.49   19.20
 -12  16  -2   65.69   17.90
  13 -16   2   99.49   22.40
 -13  16  -2   91.69   19.40
  14 -16   2  119.19   24.60
 -14  16  -2  142.29   22.70
  15 -16   2   11.60   22.00
 -15  16  -2   40.20   19.80
  16 -16   2  -15.30   21.20
 -16  16  -2   -6.40   19.00
  17 -17  -2  295.27   37.90
 -17  17   2  287.67   35.30
  16 -17  -2   -6.90   18.80
 -16  17   2  -14.60   17.70
  15 -17  -2  256.47   33.00
 -15  17   2  275.17   31.90
  14 -17  -2  107.59   22.10
 -14  17   2  126.69   20.90
  13 -17  -2  364.06   32.40
 -13  17   2  355.56   29.50
  12 -17  -2   15.00   15.00
 -12  17   2    1.20   13.90
  11 -17  -2  590.84   33.90
 -11  17   2  531.65   31.10
  10 -17  -2  241.68   24.70
 -10  17   2  193.68   21.60
   9 -17  -2  335.97   25.90
  -9  17   2  362.46   24.40
   8 -17  -2  680.83   31.60
  -8  17   2  720.23   30.80
   7 -17  -2  370.06   23.30
  -7  17   2  328.27   22.40
   6 -17  -2   45.90   12.10
  -6  17   2   50.09   11.80
   5 -17  -2  865.31   31.50
  -5  17   2  833.02   31.30
   4 -17  -2  350.06   20.40
  -4  17   2  376.86   21.00
   3 -17  -2  500.05   22.80
  -3  17   2  529.25   23.40
  -2 -17   2  190.28   10.80
   2 -17  -2  194.48   15.90
  -2 -17   2  192.58   12.30
  -2  17   2  186.88   16.50
  -1 -17   2 1225.48   33.60
   1 -17  -2 1241.58   35.00
  -1  17   2 1256.07   36.80
  -1  17   2 1207.58   37.10
   1  17  -2 1259.37   38.90
   0 -17   2  205.48   14.60
   0 -17  -2  189.68   15.60
   0 -17   2  188.78   13.40
   0 -17  -2  201.88   14.30
   0  17  -2  201.08   17.50
   0  17   2  171.98   16.00
   0  17   2  199.98   16.90
   1 -17   2  920.51   30.20
  -1 -17  -2  959.10   27.60
  -1 -17  -2  979.00   30.30
  -1  17  -2  931.61   33.00
   1  17   2  935.81   28.70
   1  17   2  957.60   31.30
  -2 -17  -2  624.94   23.70
   2 -17   2  634.64   25.30
  -2  17  -2  635.54   26.50
   2  17   2  646.34   22.10
   2  17   2  651.23   25.40
  -3 -17  -2   42.00   10.10
   3 -17   2   38.00   11.30
  -3  17  -2   43.20   11.30
  -4 -17  -2    4.40    9.60
   4 -17   2    6.60   10.60
  -4  17  -2    5.20    9.80
  -5 -17  -2  730.23   26.30
   5 -17   2  721.53   30.90
  -5  17  -2  706.03   29.60
  -6 -17  -2   24.10   10.80
   6 -17   2    4.40   12.10
  -6  17  -2    2.50   10.60
   7 -17   2  216.08   23.00
  -7 -17  -2  151.98   16.60
  -7  17  -2  151.68   19.00
   8 -17   2  881.21   38.20
  -8 -17  -2  893.11   31.10
  -8  17  -2  871.61   36.30
   9 -17   2  120.59   19.60
  -9 -17  -2  113.09   18.00
  -9  17  -2  127.59   20.70
  10 -17   2  207.58   27.10
 -10 -17  -2  229.88   20.50
 -10  17  -2  211.78   24.00
 -11 -17  -2  -14.40   12.70
  11 -17   2   32.50   18.10
 -11  17  -2    3.80   14.50
  12 -17   2   13.40   17.30
 -12  17  -2    2.90   14.90
  13 -17   2    4.60   18.20
 -13  17  -2   15.30   16.50
  14 -17   2  942.11   49.30
 -14  17  -2  936.81   45.20
  15 -17   2   72.99   23.90
 -15  17  -2  -12.10   17.70
  16 -17   2   32.00   22.90
 -16  17  -2   43.00   22.20
  17 -18  -2  225.68   37.80
 -17  18   2  283.47   35.20
  16 -18  -2   72.79   23.30
 -16  18   2   84.49   22.80
  15 -18  -2  637.34   42.60
 -15  18   2  669.53   40.40
  14 -18  -2  271.07   31.50
 -14  18   2  238.08   29.30
  13 -18  -2   21.60   16.70
 -13  18   2    0.20   14.70
  12 -18  -2   -7.00   14.10
 -12  18   2    4.70   14.20
  11 -18  -2  115.99   20.10
 -11  18   2  132.29   18.80
  10 -18  -2  171.38   23.70
 -10  18   2  164.18   21.90
   9 -18  -2  403.46   27.60
  -9  18   2  388.16   25.60
   8 -18  -2  839.72   35.60
  -8  18   2  847.82   34.40
   7 -18  -2  -19.60   10.70
  -7  18   2   -7.60   10.10
   6 -18  -2  121.29   15.70
  -6  18   2  119.09   15.00
   5 -18  -2  483.45   24.30
  -5  18   2  445.36   23.60
   4 -18  -2   42.90   11.30
  -4  18   2   28.50   10.80
   3 -18  -2  212.78   17.20
  -3 -18   2  192.18   10.60
  -3  18   2  227.28   17.90
   2 -18  -2 2194.48   55.19
  -2 -18   2 2082.39   50.59
  -2 -18   2 2087.19   50.59
  -2  18   2 2199.88   57.29
   1 -18  -2  292.77   16.90
  -1 -18   2  280.97   15.70
  -1  18   2  294.47   19.40
   1  18  -2  279.67   19.90
  -1  18   2  359.86   25.30
   0 -18  -2   23.60    8.80
   0 -18  -2   18.50    9.70
   0 -18   2   36.70    9.10
   0  18   2   41.30   10.60
   0  18  -2   39.90   11.00
   0  18   2   26.00   12.00
  -1 -18  -2 1902.11   46.50
   1 -18   2 1897.01   49.40
  -1 -18  -2 1833.52   49.20
   1  18   2 1894.71   47.80
   1  18   2 1851.21   50.49
  -1  18  -2 1784.82   52.49
  -2 -18  -2  351.96   18.90
   2 -18   2  371.96   20.40
   2  18   2  356.76   20.40
  -2  18  -2  387.46   21.70
   3 -18   2  264.87   19.30
  -3 -18  -2  231.28   16.80
  -3  18  -2  242.98   19.50
  -4 -18  -2  429.96   20.50
   4 -18   2  425.86   23.90
  -4  18  -2  387.26   23.20
  -5 -18  -2  350.66   19.30
   5 -18   2  296.97   23.00
  -5  18  -2  380.96   23.00
  -6 -18  -2  779.22   28.00
   6 -18   2  740.13   33.50
  -6  18  -2  751.92   31.90
   7 -18   2  406.46   27.30
  -7 -18  -2  371.26   21.20
  -7  18  -2  377.76   24.90
   8 -18   2  373.46   28.40
  -8 -18  -2  371.16   21.70
  -8  18  -2  387.76   25.70
   9 -18   2   41.80   16.00
  -9 -18  -2   17.50   13.00
  -9  18  -2   20.00   14.00
 -10 -18  -2  731.73   30.10
  10 -18   2  770.12   39.80
 -10  18  -2  727.23   35.50
 -11 -18  -2  283.37   23.10
  11 -18   2  326.67   31.70
 -11  18  -2  337.77   27.90
  12 -18   2  430.06   35.00
 -12  18  -2  413.86   31.20
  13 -18   2  402.56   36.20
 -13  18  -2  433.26   33.10
  14 -18   2   27.40   20.20
 -14  18  -2   16.90   17.50
  15 -18   2   45.50   24.20
 -15  18  -2   67.39   21.10
  16 -18   2  216.08   32.00
 -16  18  -2  235.58   33.90
  17 -19  -2  224.48   37.10
 -17  19   2  321.47   35.90
  16 -19  -2   46.80   21.20
 -16  19   2   -5.50   18.30
  15 -19  -2  214.88   32.10
 -15  19   2  181.78   29.30
  14 -19  -2   -0.70   16.90
 -14  19   2    7.20   16.00
  13 -19  -2  115.89   22.00
 -13  19   2  108.99   19.90
  12 -19  -2  903.31   43.60
 -12  19   2  843.52   40.00
  11 -19  -2  165.78   25.40
 -11  19   2  205.28   24.50
  10 -19  -2   90.89   18.30
 -10  19   2   85.69   16.70
   9 -19  -2  525.65   31.10
  -9  19   2  560.74   29.80
   8 -19  -2  186.48   22.00
  -8  19   2  149.59   20.00
   7 -19  -2  115.39   16.00
  -7  19   2   80.29   14.40
   6 -19  -2  710.33   30.40
  -6  19   2  697.93   30.00
   5 -19  -2 2091.29   58.29
  -5  19   2 2123.69   58.69
   4 -19  -2  702.03   28.20
  -4  19   2  689.23   29.00
   3 -19  -2  404.96   21.60
  -3 -19   2  409.46   15.10
  -3  19   2  444.26   22.90
  -2 -19   2  523.65   19.10
   2 -19  -2  589.74   23.60
  -2  19   2  570.04   25.40
  -1 -19   2   44.30    8.30
  -1 -19   2   34.40    8.70
   1 -19  -2   29.50    9.50
   1  19  -2   49.90   12.00
  -1  19   2   36.80   11.00
   0 -19  -2  210.28   17.00
   0 -19  -2  207.48   15.20
   0 -19   2  238.48   15.90
   0  19   2  191.18   20.70
   0  19   2  209.58   17.90
   0  19  -2  195.08   18.70
  -1 -19  -2 1781.72   44.00
   1 -19   2 1670.23   46.80
  -1 -19  -2 1702.93   46.60
   1  19   2 1750.12   45.30
   1  19   2 1722.23   48.30
  -1  19  -2 1698.13   50.69
   2 -19   2  552.44   24.50
  -2 -19  -2  555.64   23.00
  -2  19  -2  533.45   26.20
   2  19   2  568.54   25.00
  -3 -19  -2    4.30    9.70
   3 -19   2   18.30   11.10
  -3  19  -2   -5.80   10.30
  -4 -19  -2   21.10   10.80
   4 -19   2   32.20   12.20
  -4  19  -2   22.70   11.50
  -5 -19  -2    6.90   11.00
   5 -19   2    8.90   12.20
  -5  19  -2  -11.10   10.60
   6 -19   2  164.88   21.80
  -6 -19  -2  187.78   17.40
  -6  19  -2  202.08   20.70
   7 -19   2  822.32   36.30
  -7 -19  -2  767.32   29.00
  -7  19  -2  774.32   34.00
  -8 -19  -2 1010.60   33.80
   8 -19   2  983.80   41.60
  -8  19  -2  978.60   39.30
   9 -19   2   36.50   16.00
  -9 -19  -2    9.10   12.40
  -9  19  -2    4.60   13.30
  10 -19   2  141.79   22.40
 -10 -19  -2  143.69   18.90
 -10  19  -2  160.08   23.90
  11 -19   2  -23.90   15.00
 -11  19  -2   -0.80   14.50
  12 -19   2   -7.50   17.30
 -12  19  -2    9.20   15.50
  13 -19   2  288.77   34.40
 -13  19  -2  297.67   31.20
  14 -19   2  572.54   43.10
 -14  19  -2  585.54   37.80
  15 -19   2  103.09   26.40
 -15  19  -2  105.79   22.60
  17 -20  -2  -11.00   19.40
 -17  20   2  -21.00   18.70
  16 -20  -2  346.07   37.70
 -16  20   2  322.57   35.30
  15 -20  -2  177.28   27.50
 -15  20   2   85.79   21.80
  14 -20  -2  417.46   36.10
 -14  20   2  371.16   32.70
  13 -20  -2    9.00   16.70
 -13  20   2  -22.00   14.30
  12 -20  -2  402.96   32.40
 -12  20   2  339.47   29.70
  11 -20  -2   27.80   16.40
 -11  20   2   18.90   14.60
  10 -20  -2  260.37   26.00
 -10  20   2  248.18   24.70
   9 -20  -2   28.70   14.20
  -9  20   2   -2.90   11.80
   8 -20  -2  499.45   29.10
  -8  20   2  438.96   27.20
   7 -20  -2  323.97   24.40
  -7  20   2  325.17   23.30
   6 -20  -2  153.88   19.80
  -6  20   2  153.18   18.40
   5 -20  -2  157.78   18.90
  -5  20   2  165.58   18.80
   4 -20  -2  540.15   25.70
  -4  20   2  550.94   26.40
   3 -20  -2   70.89   12.10
  -3 -20   2   36.80    7.00
  -3  20   2   63.99   12.90
  -2 -20   2 2102.69   51.59
   2 -20  -2 2182.88   56.29
   2  20  -2 2140.09   59.89
  -2  20   2 2188.98   58.99
  -1 -20   2  613.84   22.70
  -1 -20   2  605.84   21.60
   1 -20  -2  616.04   23.80
   1  20  -2  594.44   27.70
  -1  20   2  584.04   26.40
   0 -20   2   55.29   10.60
   0 -20  -2   52.49   10.20
   0 -20  -2   41.20   11.30
   0  20   2   68.79   12.50
   0  20  -2   51.39   12.20
   0  20   2   65.69   13.30
  -1 -20  -2  172.58   14.00
  -1 -20  -2  178.58   16.30
   1 -20   2  170.48   16.50
   1  20   2  168.48   17.70
   1  20   2  192.28   18.10
  -1  20  -2  161.88   19.60
   2 -20   2  484.25   23.70
  -2 -20  -2  463.55   21.90
  -2  20  -2  453.25   24.80
   2  20   2  526.05   24.40
   3 -20   2   10.80   11.20
  -3 -20  -2   12.80   10.60
   3  20   2    8.80   10.50
  -3  20  -2    9.60   11.20
   4 -20   2 2263.17   63.29
  -4 -20  -2 2368.56   58.89
  -4  20  -2 2263.47   64.19
  -5 -20  -2 1082.49   34.30
   5 -20   2 1031.40   39.00
  -5  20  -2 1021.40   38.60
  -6 -20  -2   16.50   11.50
   6 -20   2   40.80   14.00
  -6  20  -2   14.10   12.40
   7 -20   2  384.16   28.50
  -7 -20  -2  411.16   22.30
  -7  20  -2  377.36   25.90
  -8 -20  -2  614.34   26.40
   8 -20   2  650.33   35.10
  -8  20  -2  601.84   32.50
  -9 -20  -2  -12.90   12.50
   9 -20   2   48.00   17.60
  -9  20  -2   -0.50   14.10
 -10 -20  -2  220.18   27.70
  10 -20   2  243.28   28.80
 -10  20  -2  235.38   26.00
  11 -20   2  644.04   38.70
 -11  20  -2  677.23   37.00
  12 -20   2  -12.10   16.70
 -12  20  -2   11.10   15.70
  13 -20   2  145.29   26.20
 -13  20  -2  133.39   22.80
  14 -20   2   62.29   22.90
 -14  20  -2   13.80   17.80
  15 -20   2   13.40   21.40
 -15  20  -2   71.89   21.50
  16 -21  -2   31.30   21.70
 -16  21   2   23.00   19.50
  15 -21  -2   68.19   23.50
 -15  21   2   77.39   21.90
  14 -21  -2  762.72   44.90
 -14  21   2  746.93   42.30
  13 -21  -2   27.20   18.10
 -13  21   2   26.30   16.90
  12 -21  -2  806.62   42.90
 -12  21   2  777.52   40.00
  11 -21  -2   26.30   17.20
 -11  21   2   13.20   15.30
  10 -21  -2   55.49   17.20
 -10  21   2   71.99   16.50
   9 -21  -2  189.28   23.70
  -9  21   2  170.08   22.00
   8 -21  -2 1397.66   48.40
  -8  21   2 1354.56   47.60
   7 -21  -2  199.68   21.80
  -7  21   2  149.69   20.50
   6 -21  -2  864.21   35.30
  -6  21   2  885.21   35.20
   5 -21  -2  143.69   19.20
  -5  21   2  180.98   19.90
   4 -21  -2   14.80   11.00
  -4  21   2   30.30   12.00
   3 -21  -2  683.03   28.00
  -3 -21   2  684.03   21.20
  -3  21   2  697.73   29.80
  -2 -21   2   48.80    9.10
  -2 -21   2   41.20    8.10
   2 -21  -2   63.19   11.60
   2  21  -2   72.79   13.70
  -2  21   2   53.89   12.90
  -1 -21   2   -2.50    8.60
   1 -21  -2   19.40   10.00
   1  21  -2   31.40   12.20
  -1  21   2   24.60   11.40
   0 -21   2 2553.54   62.29
   0 -21  -2 2482.15   60.89
   0 -21  -2 2459.85   63.69
   0  21  -2 2450.85   67.29
   0  21   2 2454.55   65.69
   0  21   2 2430.36   68.09
   1 -21   2  493.35   23.20
  -1 -21  -2  487.05   22.50
  -1 -21  -2  493.25   20.00
   1  21   2  480.55   24.80
   1  21   2  456.65   22.50
  -1  21  -2  458.05   26.40
   2 -21   2  545.85   25.60
  -2 -21  -2  542.75   24.30
   2  21   2  566.44   26.30
  -2  21  -2  546.05   27.90
   3 -21   2  200.08   19.70
  -3 -21  -2  174.68   17.40
  -3  21  -2  150.08   19.80
   3  21   2  164.18   19.00
   4 -21   2  878.21   34.60
  -4 -21  -2  884.81   30.80
  -4  21  -2  866.41   35.40
   5 -21   2   26.50   13.80
  -5 -21  -2   50.99   12.60
  -5  21  -2   42.00   13.80
  -6 -21  -2 1212.78   37.50
   6 -21   2 1156.58   44.10
  -6  21  -2 1200.58   43.30
   7 -21   2   16.70   14.50
  -7 -21  -2   -4.70   11.70
  -7  21  -2    8.80   13.00
  -8 -21  -2   -9.70   11.70
   8 -21   2   67.59   17.80
  -8  21  -2    2.50   13.70
  -9 -21  -2 1062.59   36.40
   9 -21   2 1069.89   46.40
  -9  21  -2 1079.99   43.70
  10 -21   2   93.49   20.60
 -10  21  -2   61.19   17.60
  11 -21   2   61.09   19.80
 -11  21  -2   60.39   17.60
  12 -21   2  367.66   34.50
 -12  21  -2  313.17   30.30
  13 -21   2  464.35   39.40
 -13  21  -2  396.76   34.40
  14 -21   2   39.50   22.50
 -14  21  -2   42.30   19.50
  15 -21   2  241.88   34.20
 -15  21  -2  221.68   30.00
  16 -22  -2  773.92   48.70
 -16  22   2  793.72   46.60
  15 -22  -2   18.00   19.60
 -15  22   2    8.80   18.30
  14 -22  -2   98.29   23.60
 -14  22   2  158.08   23.60
  13 -22  -2  186.88   27.30
 -13  22   2  197.08   27.90
  12 -22  -2  122.99   22.60
 -12  22   2  130.59   21.20
  11 -22  -2  -10.60   14.90
 -11  22   2   32.00   16.00
  10 -22  -2 1715.63   59.29
 -10  22   2 1718.53   57.59
   9 -22  -2  -11.80   13.20
  -9  22   2   -8.50   12.70
   8 -22  -2   67.69   15.90
  -8  22   2   38.40   14.40
   7 -22  -2  435.96   27.60
  -7  22   2  321.57   25.30
   6 -22  -2  164.08   20.60
  -6  22   2  152.28   20.50
   5 -22  -2  451.15   26.60
  -5  22   2  452.55   26.30
   4 -22  -2 2059.29   58.59
  -4  22   2 2178.28   61.19
   3 -22  -2  262.87   20.10
  -3  22   2  214.08   20.90
  -2 -22   2  246.08   14.90
   2 -22  -2  293.67   19.20
  -2 -22   2  244.78   14.70
   2  22  -2  211.98   21.60
  -2  22   2  245.78   20.90
  -1 -22   2  447.06   20.20
   1 -22  -2  418.06   21.30
  -1  22   2  448.36   25.00
   1  22  -2  456.55   25.90
   0 -22  -2   50.39   10.20
   0 -22  -2   35.90   11.90
   0 -22   2    5.30    9.90
   0  22  -2   32.90   12.40
   0  22   2   20.00   11.50
  -1 -22  -2  490.15   19.90
   1 -22   2  395.16   22.20
  -1 -22  -2  406.26   22.30
  -1  22  -2  387.76   25.50
   1  22   2  436.66   24.30
   1  22   2  421.76   22.40
   2 -22   2 1891.31   54.29
  -2 -22  -2 1948.21   52.69
  -2  22  -2 1933.71   57.59
   2  22   2 1997.60   55.39
   3 -22   2   63.29   14.10
  -3 -22  -2   80.39   13.40
  -3  22  -2   70.59   14.80
   3  22   2   66.09   14.30
  -4 -22  -2    5.90   11.60
   4 -22   2   15.50   12.90
  -4  22  -2   12.80   12.70
   5 -22   2   79.39   16.10
  -5 -22  -2   70.39   13.20
  -5  22  -2   53.59   15.50
  -6 -22  -2   73.39   13.80
   6 -22   2   79.19   17.40
  -6  22  -2   99.69   17.10
   7 -22   2  969.00   42.40
  -7 -22  -2 1034.20   34.90
  -7  22  -2 1090.39   42.20
  -8 -22  -2  985.30   34.50
   8 -22   2 1062.29   44.60
  -8  22  -2 1033.90   42.40
   9 -22   2  273.57   29.20
  -9  22  -2  231.48   26.20
  10 -22   2  182.88   28.10
 -10  22  -2  122.19   19.90
  11 -22   2   99.49   22.30
 -11  22  -2   33.60   16.90
  12 -22   2   22.20   20.20
 -12  22  -2   -0.90   16.50
  13 -22   2  531.65   41.90
 -13  22  -2  533.35   37.80
  14 -22   2   80.99   24.90
 -14  22  -2   70.99   21.60
  15 -22   2  184.88   30.80
 -15  22  -2  172.98   27.00
  16 -23  -2   88.39   24.50
 -16  23   2  102.19   22.60
  15 -23  -2  177.58   29.40
 -15  23   2  165.88   26.40
  14 -23  -2  157.58   27.00
 -14  23   2  171.78   28.70
  13 -23  -2  196.48   31.50
 -13  23   2  171.58   27.40
  12 -23  -2  156.08   23.60
 -12  23   2  181.28   27.40
  11 -23  -2  102.49   20.40
 -11  23   2   87.79   19.20
  10 -23  -2    1.10   14.30
 -10  23   2   18.90   14.90
   9 -23  -2  415.76   30.50
  -9  23   2  525.15   31.00
   8 -23  -2  112.89   18.80
  -8  23   2  107.79   18.30
   7 -23  -2  245.38   24.80
  -7  23   2  241.08   23.60
   6 -23  -2  200.98   22.50
  -6  23   2  227.58   22.70
   5 -23  -2   -3.00   11.60
  -5  23   2   21.70   12.90
   4 -23  -2  156.18   19.50
  -4  23   2  128.69   19.60
   3 -23  -2 1606.14   47.20
  -3  23   2 1534.45   49.60
   2 -23  -2   42.10   11.50
  -2 -23   2   43.80    8.90
   2  23  -2   51.69   14.60
  -2  23   2   64.29   14.50
  -1 -23   2   97.79   14.60
   1 -23  -2  133.79   16.40
  -1  23   2   85.79   15.20
   1  23  -2   99.59   15.80
   0 -23  -2  508.55   22.00
   0 -23  -2  485.25   24.90
   0 -23   2  494.75   22.80
   0  23   2  476.85   26.70
   0  23  -2  517.65   27.90
  -1 -23  -2   12.70    9.60
  -1 -23  -2    1.70   11.10
   1 -23   2   -1.30   10.40
   1  23   2   21.90   12.60
  -1  23  -2   -1.10   12.00
   1  23   2    9.40   12.80
  -2 -23  -2  286.57   19.90
   2 -23   2  228.28   20.80
   2  23   2  279.77   21.70
  -2  23  -2  211.48   21.80
   3 -23   2 1420.96   45.50
  -3 -23  -2 1463.65   42.20
   3  23   2 1406.66   45.30
  -3  23  -2 1293.87   46.80
  -4 -23  -2    2.50   11.60
   4 -23   2   20.50   13.30
  -4  23  -2   18.00   14.00
   4  23   2   30.50   13.50
   5 -23   2  254.47   24.50
  -5 -23  -2  260.57   20.00
  -5  23  -2  268.87   24.20
  -6 -23  -2   59.89   13.70
   6 -23   2   83.19   17.40
  -6  23  -2   65.09   16.60
  -7 -23  -2  218.48   20.20
   7 -23   2  198.28   25.60
  -7  23  -2  240.08   24.20
   8 -23   2  140.99   21.70
  -8 -23  -2  108.89   19.70
  -8  23  -2  146.29   24.10
   9 -23   2  617.04   37.70
  -9  23  -2  615.54   36.00
  10 -23   2  178.68   25.00
 -10  23  -2  128.89   21.20
  11 -23   2   17.60   18.30
 -11  23  -2   13.70   16.60
  12 -23   2  388.26   36.80
 -12  23  -2  332.37   32.30
  13 -23   2  125.79   25.90
 -13  23  -2  108.19   23.10
  14 -23   2   94.19   26.30
 -14  23  -2   66.39   22.30
  15 -24  -2   27.50   20.60
 -15  24   2  -26.00   17.10
  14 -24  -2   29.40   20.20
 -14  24   2   30.30   18.80
  13 -24  -2   56.19   20.40
 -13  24   2   40.30   18.40
  12 -24  -2  270.67   31.30
 -12  24   2  229.18   28.90
  11 -24  -2    9.90   16.10
 -11  24   2    6.40   15.40
  10 -24  -2  761.62   39.40
 -10  24   2  690.53   37.20
   9 -24  -2  128.89   20.30
  -9  24   2  126.99   19.90
   8 -24  -2   16.60   15.10
  -8  24   2   -0.70   13.60
   7 -24  -2   16.80   14.40
  -7  24   2   14.70   13.40
   6 -24  -2    5.60   13.10
  -6  24   2   -3.90   12.60
   5 -24  -2  131.39   20.40
  -5  24   2  175.88   21.40
   4 -24  -2  862.91   34.10
  -4  24   2  857.81   36.10
   3 -24  -2   46.30   12.80
   3  24  -2   27.00   13.90
  -3  24   2   38.00   14.10
   2 -24  -2  275.87   20.00
   2  24  -2  232.88   23.50
  -2  24   2  246.68   22.90
   1 -24  -2  282.47   19.60
  -1 -24   2  281.27   17.80
  -1  24   2  285.47   23.10
   1  24  -2  244.68   23.50
   0 -24  -2   -7.10    9.90
   0 -24   2   10.30   10.90
   0 -24  -2    3.30   11.90
   0  24  -2   19.20   13.00
   0  24   2    0.80   12.20
  -1 -24  -2  130.49   14.70
  -1 -24  -2  106.19   17.40
   1 -24   2  115.69   17.40
  -1  24  -2  123.59   20.40
   1  24   2  101.29   16.50
   2 -24   2  458.85   25.20
  -2 -24  -2  460.25   23.90
   2  24   2  450.75   26.20
  -2  24  -2  414.56   27.70
   3 -24   2  897.91   35.30
  -3 -24  -2  877.41   32.00
  -3  24  -2  809.82   37.40
   3  24   2  905.31   35.40
   4 -24   2  214.48   22.80
  -4 -24  -2  205.48   19.10
   4  24   2  196.18   22.40
  -4  24  -2  203.78   23.70
   5 -24   2   34.70   15.40
  -5 -24  -2   30.90   12.80
  -5  24  -2   39.20   15.30
  -6 -24  -2   50.79   14.20
   6 -24   2   96.79   18.30
  -6  24  -2   94.89   18.00
   7 -24   2   58.69   18.30
  -7 -24  -2   34.20   13.30
  -7  24  -2   60.49   16.80
   8 -24   2   33.50   18.20
  -8  24  -2   82.49   18.40
   9 -24   2  256.87   30.10
  -9  24  -2  201.38   27.50
  10 -24   2   -1.70   17.40
 -10  24  -2   10.00   15.70
  11 -24   2   16.40   18.80
 -11  24  -2   -4.60   15.90
  12 -24   2    9.10   20.40
 -12  24  -2   32.20   18.30
  13 -24   2  -29.50   19.30
 -13  24  -2  -12.60   16.70
  14 -24   2   92.69   24.30
 -14  24  -2  117.29   23.90
  15 -25  -2  -10.40   18.30
 -15  25   2    9.40   18.10
  14 -25  -2    5.70   20.20
 -14  25   2   20.90   19.70
  13 -25  -2   42.50   20.10
 -13  25   2   72.29   20.20
  12 -25  -2  179.58   29.20
 -12  25   2  148.39   23.00
  11 -25  -2   27.70   17.50
 -11  25   2   28.80   16.70
  10 -25  -2   33.50   17.00
 -10  25   2   -4.40   14.10
   9 -25  -2   78.39   19.00
  -9  25   2   32.70   16.20
   8 -25  -2   18.40   15.00
  -8  25   2   16.40   14.60
   7 -25  -2   10.80   14.20
  -7  25   2   -1.20   13.10
   6 -25  -2   71.59   16.20
  -6  25   2   90.69   17.10
   5 -25  -2   28.20   13.60
  -5  25   2    9.40   13.60
   4 -25  -2   42.30   13.40
  -4  25   2   52.89   14.80
   3 -25  -2  489.05   25.80
  -3  25   2  456.05   27.80
   3  25  -2  436.96   28.30
   2 -25  -2   80.89   13.80
   2  25  -2   82.09   16.30
  -2  25   2   77.19   16.10
   1 -25  -2   84.79   13.00
  -1 -25   2   70.29   11.40
   1  25  -2   61.39   15.60
  -1  25   2   73.59   16.10
   0 -25   2   36.90   11.40
   0 -25  -2   31.90   12.70
   0 -25  -2   15.50   11.10
   0  25  -2   21.70   14.20
   0  25   2   37.20   13.90
  -1 -25  -2    8.40   12.20
   1 -25   2    8.50   12.10
  -1 -25  -2   18.30   10.10
   1  25   2    8.60   13.10
  -1  25  -2   11.50   13.60
  -2 -25  -2   65.19   14.00
   2 -25   2   73.89   15.00
  -2  25  -2   67.39   16.30
   2  25   2   58.59   14.60
  -3 -25  -2    0.10   12.10
   3 -25   2   34.90   13.70
  -3  25  -2   11.50   13.90
   3  25   2   17.70   13.70
  -4 -25  -2   -5.30   12.30
   4 -25   2   12.00   13.90
  -4  25  -2    8.30   14.20
   4  25   2   22.60   14.30
  -5 -25  -2  633.64   27.50
   5 -25   2  620.44   33.00
   5  25   2  612.84   32.00
  -5  25  -2  607.44   34.30
   6 -25   2    2.80   15.00
  -6 -25  -2   -2.70   12.70
  -6  25  -2   36.80   15.50
   7 -25   2   50.19   17.80
  -7  25  -2   80.49   18.50
   8 -25   2   -8.30   16.30
  -8  25  -2   17.40   15.70
   9 -25   2    6.30   17.90
  -9  25  -2   26.00   16.60
  10 -25   2   94.69   22.80
 -10  25  -2   88.19   19.30
  11 -25   2    7.20   20.10
 -11  25  -2  -17.60   16.10
  12 -25   2   -0.20   19.50
 -12  25  -2   52.89   19.40
  13 -25   2   36.40   22.20
 -13  25  -2   32.90   19.90
  14 -26  -2   -9.60   18.40
 -14  26   2   -1.50   18.30
  13 -26  -2   -3.10   17.80
 -13  26   2   14.20   18.20
  12 -26  -2  116.39   23.00
 -12  26   2   67.49   19.80
  11 -26  -2  127.89   23.60
 -11  26   2  168.88   26.90
  10 -26  -2  535.65   36.20
 -10  26   2  472.25   33.10
   9 -26  -2   10.30   16.20
  -9  26   2   -9.60   14.30
   8 -26  -2  180.98   25.50
  -8  26   2  210.58   25.80
   7 -26  -2  -14.50   13.50
  -7  26   2    1.60   13.70
   6 -26  -2   44.20   15.40
  -6  26   2   61.99   16.60
   5 -26  -2  321.37   24.80
  -5  26   2  343.67   26.80
   4 -26  -2  992.70   37.70
   4  26  -2  945.01   40.60
  -4  26   2  969.10   40.00
   3 -26  -2   18.50   12.60
  -3 -26   2   62.09   10.60
  -3  26   2   36.10   15.00
   3  26  -2   29.20   15.30
   2 -26  -2    0.60   11.50
  -2  26   2   14.50   13.80
   2  26  -2   -0.20   13.10
   1 -26  -2   53.29   14.80
   1 -26  -2   88.39   13.40
  -1 -26   2   64.59   11.50
  -1  26   2   75.99   16.50
   1  26  -2   87.79   17.20
   0 -26   2   17.90   11.10
   0 -26  -2    2.50   10.40
   0 -26  -2    4.30   12.50
   0  26  -2  -13.30   13.20
   0  26   2   -8.60   13.10
  -1 -26  -2  686.93   24.80
   1 -26   2  589.84   27.80
  -1 -26  -2  607.54   28.00
   1  26   2  685.43   32.70
  -1  26  -2  592.74   33.00
  -2 -26  -2  445.36   25.20
   2 -26   2  485.95   27.10
   2  26   2  530.65   28.60
  -2  26  -2  461.15   30.20
   3 -26   2   16.10   13.20
  -3 -26  -2   44.90   13.50
  -3  26  -2   12.40   14.40
   3  26   2   24.00   14.30
  -4 -26  -2   15.70   13.40
   4 -26   2   38.20   15.10
   4  26   2    9.40   14.50
  -4  26  -2   -7.20   13.70
   5 -26   2   -6.50   14.60
  -5 -26  -2   -6.00   12.60
   5  26   2    8.50   15.00
  -5  26  -2  -11.20   14.70
  -6 -26  -2   19.10   18.20
   6 -26   2   12.90   15.70
  -6  26  -2  -14.60   14.30
   7 -26   2  344.07   30.30
  -7  26  -2  313.97   29.20
   8 -26   2  209.68   29.10
  -8  26  -2  225.78   27.10
   9 -26   2   42.00   20.40
  -9  26  -2   75.89   19.10
  10 -26   2   47.60   21.50
 -10  26  -2   37.20   17.90
  11 -26   2   -4.70   18.70
 -11  26  -2   25.00   17.70
  12 -26   2   20.50   20.90
 -12  26  -2   14.90   17.90
  13 -26   2  224.88   35.50
 -13  26  -2  282.17   33.80
  14 -27  -2  141.79   26.60
 -14  27   2  145.19   25.60
  13 -27  -2  122.79   25.00
 -13  27   2  195.68   30.30
  12 -27  -2  463.05   37.80
 -12  27   2  472.75   36.30
  11 -27  -2  212.88   30.90
 -11  27   2  146.89   23.00
  10 -27  -2   19.50   17.00
 -10  27   2    8.90   16.00
   9 -27  -2  304.07   30.30
  -9  27   2  370.06   30.50
   8 -27  -2  175.88   26.00
  -8  27   2  163.38   25.20
   7 -27  -2   39.80   16.00
  -7  27   2   27.80   14.90
   6 -27  -2  308.07   26.40
  -6  27   2  341.27   28.60
   5 -27  -2  174.98   23.20
  -5  27   2  167.08   23.90
   4 -27  -2   62.79   15.10
   4  27  -2   62.29   17.40
  -4  27   2   58.89   16.50
  -3 -27   2  960.20   30.50
   3 -27  -2 1096.19   38.10
   3  27  -2  989.00   42.40
  -3  27   2  955.20   40.70
   2 -27  -2  526.85   26.70
  -2  27   2  501.65   30.70
   2  27  -2  518.45   31.40
   1 -27  -2   20.50   11.40
  -1 -27   2   21.80   10.50
   1 -27  -2   14.10   13.30
  -1  27   2  -17.30   13.80
   1  27  -2   41.60   15.60
   0 -27   2  715.73   28.60
   0 -27  -2  725.03   27.80
   0 -27  -2  702.73   30.90
   0  27  -2  767.42   36.40
   0  27   2  730.13   34.80
   1 -27   2   18.90   12.50
  -1 -27  -2   -2.90   12.70
  -1 -27  -2    9.50   10.50
  -1  27  -2   14.20   14.60
   1  27   2  -10.00   14.00
  -2 -27  -2   28.60   13.80
   2 -27   2   50.29   14.20
  -2  27  -2   20.60   15.80
   2  27   2   70.09   16.20
  -3 -27  -2 1889.01   53.79
   3 -27   2 1915.01   57.89
  -3  27  -2 1917.91   62.19
   3  27   2 1864.61   58.39
   4 -27   2   20.40   15.20
  -4 -27  -2   27.90   13.70
  -4  27  -2   48.60   17.50
   4  27   2   28.50   15.60
   5 -27   2   26.20   16.60
  -5 -27  -2   18.40   14.20
  -5  27  -2   -7.00   15.80
   5  27   2   23.10   16.00
   6 -27   2 1154.28   46.80
  -6  27  -2 1060.89   46.20
   6  27   2 1130.99   44.90
   7 -27   2   59.89   19.10
  -7  27  -2   41.30   17.70
   8 -27   2  358.86   33.00
  -8  27  -2  305.77   30.60
   9 -27   2  347.57   33.80
  -9  27  -2  290.97   31.00
  10 -27   2    1.10   19.30
 -10  27  -2    9.10   17.90
  11 -27   2  124.89   24.80
 -11  27  -2   79.29   21.40
  12 -27   2  315.57   37.20
 -12  27  -2  292.87   33.90
 -13  27  -2   18.80   19.60
  14 -28  -2   27.90   20.90
 -14  28   2   34.80   19.40
  13 -28  -2    6.30   19.80
 -13  28   2   -2.80   17.90
  12 -28  -2  139.59   25.10
 -12  28   2   78.79   21.50
  11 -28  -2   -6.90   16.90
 -11  28   2  -14.20   15.50
  10 -28  -2 1131.99   50.69
 -10  28   2 1140.29   49.80
   9 -28  -2   57.29   18.50
  -9  28   2   47.30   18.20
   8 -28  -2    8.80   15.90
  -8  28   2   11.50   15.90
   7 -28  -2  121.19   19.60
  -7  28   2  103.49   19.70
   6 -28  -2    4.50   14.10
  -6  28   2   -6.50   14.00
   5 -28  -2  158.48   22.60
  -5  28   2  150.68   24.20
   4 -28  -2 1220.78   43.30
  -4  28   2 1098.09   45.30
   4  28  -2 1174.08   47.10
   3 -28  -2   52.79   14.30
   3  28  -2   60.89   17.60
  -3  28   2   72.79   17.70
   2 -28  -2   32.10   13.30
   2  28  -2   28.60   15.90
  -2  28   2   25.80   15.80
   1 -28  -2   76.69   13.60
   1 -28  -2   94.19   16.60
  -1 -28   2   57.39   11.50
  -1  28   2   82.49   17.30
   1  28  -2   93.19   18.20
   0 -28  -2   86.49   15.20
   0 -28   2   55.19   12.80
   0 -28  -2   64.29   12.80
   0  28  -2  104.49   19.30
   0  28   2   87.29   17.70
  -1 -28  -2  283.97   22.30
  -1 -28  -2  274.17   24.30
   1 -28   2  253.07   21.50
  -1  28  -2  315.07   26.80
   1  28   2  269.37   25.70
  -2 -28  -2 1096.09   37.90
   2 -28   2 1105.29   40.00
   2  28   2 1062.89   42.80
  -2  28  -2 1070.79   45.30
   3 -28   2  675.03   32.50
  -3 -28  -2  616.74   28.50
  -3  28  -2  596.14   35.60
   3  28   2  641.14   33.80
   4 -28   2   21.40   15.10
  -4 -28  -2   -5.90   13.40
  -4  28  -2   34.50   17.20
   4  28   2   -5.90   15.10
   5 -28   2   55.99   17.20
   5  28   2   48.70   17.20
  -5  28  -2   52.19   18.50
   6 -28   2   49.50   18.00
  -6  28  -2   66.99   18.50
   6  28   2   51.69   17.80
   7 -28   2  723.83   40.40
  -7  28  -2  679.93   39.00
   8 -28   2  432.76   35.20
  -8  28  -2  439.26   33.70
   9 -28   2  274.37   32.70
  -9  28  -2  307.37   31.10
  10 -28   2   66.69   22.10
 -10  28  -2   34.40   19.20
  11 -28   2   16.10   20.80
 -11  28  -2  -36.20   15.60
  12 -28   2    0.70   19.20
 -12  28  -2   29.10   20.40
  13 -29  -2   63.39   23.00
 -13  29   2   52.89   20.70
  12 -29  -2  136.49   26.00
 -12  29   2   67.99   21.00
  11 -29  -2   41.60   20.00
 -11  29   2   51.69   19.70
  10 -29  -2  -20.60   15.60
 -10  29   2   27.90   17.40
   9 -29  -2   92.29   20.90
  -9  29   2  124.09   22.90
   8 -29  -2   78.59   19.00
  -8  29   2   84.39   19.40
   7 -29  -2  322.27   29.10
  -7  29   2  304.17   29.40
   6 -29  -2  352.16   28.20
  -6  29   2  322.07   29.60
   5 -29  -2   -6.70   13.90
   5  29  -2   33.30   17.20
  -5  29   2    8.40   15.20
   4 -29  -2   17.40   13.80
   4  29  -2   43.50   18.00
  -4  29   2   11.80   15.50
   3 -29  -2  315.67   24.40
  -3  29   2  236.88   26.70
   3  29  -2  272.97   28.30
   2 -29  -2   20.40   13.40
   2  29  -2    9.90   15.90
  -2  29   2    8.60   15.50
   1 -29  -2  266.57   21.10
   1 -29  -2  243.18   23.90
   1  29  -2  207.88   26.40
  -1  29   2  219.38   25.90
   0 -29   2  814.72   32.50
   0 -29  -2  888.51   35.50
   0 -29  -2  881.81   31.70
   0  29   2  948.61   40.80
   0  29  -2  943.11   41.60
   1 -29   2   40.40   13.80
  -1 -29  -2   70.29   15.20
  -1  29  -2   44.40   17.50
   1  29   2   62.99   17.30
  -2 -29  -2   78.19   15.60
   2 -29   2   98.09   15.80
   2  29   2   68.19   18.20
  -2  29  -2  103.09   20.40
  -3 -29  -2   82.09   15.60
   3 -29   2   72.99   17.00
  -3  29  -2   51.19   18.00
   3  29   2   61.89   17.90
   4 -29   2   19.50   14.90
   4  29   2   31.70   16.40
  -4  29  -2   -3.00   16.40
   5 -29   2  127.29   19.60
  -5  29  -2   67.59   19.60
   5  29   2   92.89   19.60
   6 -29   2  584.64   35.30
  -6  29  -2  529.05   35.20
   6  29   2  467.15   33.80
   7 -29   2  216.58   29.00
  -7  29  -2  124.99   22.60
   7  29   2  132.29   21.10
   8 -29   2   57.69   20.30
  -8  29  -2   84.79   20.60
   9 -29   2  522.55   38.70
  -9  29  -2  481.65   36.50
  10 -29   2   -0.50   18.90
 -10  29  -2    7.70   17.80
  11 -29   2   -3.10   20.10
 -11  29  -2   -8.20   18.00
  12 -30  -2   96.89   23.60
 -12  30   2  115.89   23.50
  11 -30  -2   62.89   21.00
 -11  30   2  120.69   22.60
  10 -30  -2   33.30   19.40
 -10  30   2   48.20   19.70
   9 -30  -2  340.97   31.30
  -9  30   2  334.27   32.30
   8 -30  -2   86.89   20.10
  -8  30   2  118.49   22.10
   7 -30  -2  144.29   21.50
  -7  30   2  181.28   26.90
   6 -30  -2  121.19   19.60
  -6  30   2  118.29   20.90
   5 -30  -2  155.98   20.50
  -5  30   2  122.89   21.00
   5  30  -2  164.48   23.80
   4 -30  -2   32.90   15.00
  -4  30   2   13.40   15.40
   4  30  -2   22.20   17.40
   3 -30  -2  425.56   27.30
  -3  30   2  414.76   31.40
   3  30  -2  410.16   31.60
   2 -30  -2  178.18   21.10
   2  30  -2  169.58   23.10
  -2  30   2  179.78   25.50
   1 -30  -2   10.30   15.40
   1 -30  -2   28.10   13.30
   1  30  -2   69.09   19.40
  -1  30   2    2.70   16.50
   0 -30   2   82.09   15.10
   0 -30  -2   95.09   17.20
   0  30  -2  184.48   25.80
   0  30   2  111.49   20.30
  -1 -30  -2  126.19   20.30
   1 -30   2   43.20   13.70
  -1  30  -2   50.79   18.20
   1  30   2   72.39   18.70
  -2 -30  -2  105.99   17.20
   2 -30   2  114.39   17.30
  -2  30  -2  127.19   22.10
   2  30   2  109.19   20.40
  -3 -30  -2   23.20   15.00
   3 -30   2   28.10   15.20
  -3  30  -2   23.40   17.40
   3  30   2   42.00   18.00
   4 -30   2  559.64   32.50
  -4  30  -2  567.14   37.20
   4  30   2  563.74   34.60
   5 -30   2  324.47   29.30
   5  30   2  345.57   29.70
  -5  30  -2  358.06   31.60
   6 -30   2   20.10   16.70
  -6  30  -2   15.30   17.00
   6  30   2    1.10   17.70
   7 -30   2   11.00   17.50
  -7  30  -2   23.50   18.30
   7  30   2   -4.60   17.10
   8 -30   2  121.59   22.90
  -8  30  -2  125.49   23.10
   8  30   2   56.69   20.60
   9 -30   2   67.19   21.20
  -9  30  -2   17.80   18.30
  10 -30   2   67.79   22.30
 -10  30  -2  166.68   26.00
  11 -30   2  113.19   24.90
 -11  30  -2  188.28   30.90
  12 -31  -2   80.99   22.90
 -12  31   2   49.90   21.30
  11 -31  -2  603.84   40.80
 -11  31   2  586.64   40.90
  10 -31  -2   52.99   20.40
 -10  31   2   82.79   21.70
   9 -31  -2  169.38   24.30
  -9  31   2  162.78   25.50
   8 -31  -2   12.50   17.20
  -8  31   2   12.40   16.50
   7 -31  -2  297.37   29.10
  -7  31   2  255.97   29.50
   6 -31  -2   -9.70   14.70
   6  31  -2   -9.30   17.40
  -6  31   2   -9.90   15.30
   5 -31  -2  168.98   24.20
   5  31  -2  103.29   22.40
  -5  31   2  127.69   21.80
   4 -31  -2  149.69   22.70
  -4  31   2  115.59   21.00
   4  31  -2  120.39   21.50
   3 -31  -2  155.68   22.30
  -3  31   2  139.99   21.90
   3  31  -2  154.38   22.60
   2 -31  -2    7.40   15.60
   2 -31  -2    6.90   13.00
  -2  31   2    4.00   16.30
   2  31  -2   31.80   18.30
   1 -31  -2   52.99   16.90
  -1  31   2   63.69   18.60
   1  31  -2   51.99   19.40
   0 -31  -2  132.49   21.70
   0  31  -2  101.39   21.00
   0  31   2  127.99   21.30
  -1 -31  -2  589.84   30.50
   1 -31   2  567.14   29.10
   1  31   2  569.24   35.40
  -1  31  -2  592.54   37.20
   2 -31   2  853.31   36.60
  -2 -31  -2  877.21   35.30
   2  31   2  874.81   42.00
  -2  31  -2  860.01   42.90
   3 -31   2   29.40   15.80
  -3  31  -2   23.10   18.30
   3  31   2   19.50   17.40
   4 -31   2    9.50   15.60
  -4  31  -2   -4.50   17.40
   4  31   2   30.10   17.60
   5 -31   2  100.39   19.90
   5  31   2  129.09   21.40
  -5  31  -2  130.29   23.20
   6 -31   2  -15.00   15.70
  -6  31  -2   11.10   16.80
   6  31   2  -12.00   17.20
   7 -31   2  158.68   24.60
  -7  31  -2  149.39   24.20
   7  31   2  113.39   22.40
   8 -31   2  781.42   45.70
  -8  31  -2  834.52   44.70
   8  31   2  826.02   44.40
   9 -31   2   22.80   18.90
  -9  31  -2  -20.20   17.70
  10 -31   2   21.70   20.90
 -10  31  -2   46.40   20.30
  11 -32  -2  236.78   33.50
 -11  32   2  259.87   32.30
  10 -32  -2  112.09   23.20
 -10  32   2  129.39   24.20
   9 -32  -2  349.27   32.90
  -9  32   2  368.56   35.50
   8 -32  -2  586.34   37.50
  -8  32   2  626.04   40.10
   7 -32  -2    1.50   16.30
  -7  32   2    1.40   16.90
   7  32  -2  -13.90   18.90
   6 -32  -2   -4.60   15.90
  -6  32   2    6.00   17.40
   6  32  -2  -23.80   18.00
   5 -32  -2  472.95   31.20
   5  32  -2  494.45   36.50
  -5  32   2  428.66   33.30
   4 -32  -2  277.47   26.00
   4  32  -2  249.28   30.70
  -4  32   2  255.87   29.00
   3 -32  -2  175.58   22.90
  -3  32   2  175.48   26.90
   3  32  -2  203.48   28.60
   2 -32  -2  303.67   27.10
  -2  32   2  357.46   30.50
   2  32  -2  305.77   31.30
   1 -32  -2  284.87   25.00
   1  32  -2  269.47   30.60
  -1  32   2  288.47   30.30
   0 -32  -2   34.20   16.10
   0  32  -2  -22.70   16.00
   0  32   2   34.00   17.90
  -1 -32  -2  420.96   27.70
   1  32   2  397.66   32.40
  -1  32  -2  464.75   34.90
   2 -32   2  234.28   25.00
   2  32   2  227.78   28.80
  -2  32  -2  259.77   29.70
   3 -32   2  121.79   19.40
   3  32   2  107.39   21.50
  -3  32  -2  149.39   23.50
   4 -32   2  256.47   27.80
   4  32   2  253.67   29.50
  -4  32  -2  312.47   32.50
   5 -32   2  251.07   29.50
  -5  32  -2  218.28   29.80
   5  32   2  307.17   30.40
   6 -32   2   32.40   18.10
   6  32   2    5.70   19.10
  -6  32  -2   19.00   18.20
   7 -32   2  570.14   37.80
  -7  32  -2  536.05   39.10
   7  32   2  587.14   38.60
   8 -32   2  188.98   31.00
  -8  32  -2  145.69   24.80
   8  32   2  172.38   25.80
   9 -32   2    4.20   19.50
  -9  32  -2    9.50   20.30
   9  32   2   36.50   21.60
  10 -32   2  265.57   34.80
 -10  32  -2  295.67   34.60
  10 -33  -2  106.89   23.80
 -10  33   2   67.69   21.60
   9 -33  -2  288.57   31.50
  -9  33   2  261.57   33.20
   8 -33  -2  142.49   22.70
  -8  33   2  151.58   25.30
   7 -33  -2  -18.00   15.20
  -7  33   2  -17.30   16.90
   7  33  -2   35.40   20.50
   6 -33  -2   -6.10   15.50
  -6  33   2    9.30   18.50
   6  33  -2   -8.20   19.50
   5 -33  -2  524.05   32.40
  -5  33   2  545.35   37.40
   5  33  -2  531.75   38.70
   4 -33  -2  170.78   24.90
   4  33  -2  119.89   23.50
  -4  33   2  114.09   22.20
  -3  33   2  468.25   34.40
   3  33  -2  409.96   34.30
   2 -33  -2   97.49   19.30
  -2  33   2  119.09   22.00
   2  33  -2  100.19   22.80
   1 -33  -2   91.39   18.20
   1  33  -2   94.69   22.40
  -1  33   2   98.89   20.90
   0 -33  -2  101.49   18.70
   0  33  -2  148.79   23.60
   0  33   2  148.39   23.20
  -1 -33  -2  467.35   42.10
   1  33   2  519.45   35.00
  -1  33  -2  538.95   36.90
   2  33   2  235.08   29.30
  -2  33  -2  257.17   30.90
   3 -33   2   17.60   16.00
   3  33   2   16.80   18.70
  -3  33  -2   22.40   18.90
   4 -33   2  210.38   26.70
   4  33   2  215.68   29.40
  -4  33  -2  172.08   25.80
   5 -33   2   -6.30   16.70
  -5  33  -2  -20.40   17.20
   5  33   2    5.80   18.10
   6 -33   2   96.59   21.50
   6  33   2   62.09   21.80
  -6  33  -2   86.79   21.70
   7 -33   2  309.37   34.50
   7  33   2  232.68   31.10
  -7  33  -2  271.97   33.20
   8 -33   2  409.56   37.70
   8  33   2  380.76   35.40
  -8  33  -2  388.26   35.70
   9 -33   2  376.46   38.60
   9  33   2  311.57   37.70
  -9  33  -2  360.66   36.90
   9 -34  -2   55.59   19.90
  -9  34   2   50.29   22.10
   8 -34  -2   25.50   19.30
   8  34  -2   48.40   23.20
  -8  34   2   63.39   21.70
   7 -34  -2    8.70   17.90
   7  34  -2   -8.10   20.30
  -7  34   2   27.90   18.20
   6 -34  -2    3.60   15.60
   6  34  -2   -6.00   20.10
  -6  34   2   19.90   18.50
   5 -34  -2  164.38   26.30
  -5  34   2  116.49   22.40
   5  34  -2  129.49   24.10
  -4  34   2   59.39   20.30
   4  34  -2   35.20   20.40
   3  34  -2   16.10   19.00
  -3  34   2   29.00   18.40
   2 -34  -2   24.30   18.00
   2  34  -2   67.69   22.10
  -2  34   2   31.50   18.60
   1 -34  -2   29.30   17.30
  -1  34   2   45.70   19.70
   1  34  -2   44.20   21.20
   0 -34  -2  -20.80   16.20
   0  34   2    7.20   18.50
   0  34  -2    7.50   19.10
   1  34   2  217.08   30.80
  -1  34  -2  257.37   32.60
   2  34   2   44.20   20.10
  -2  34  -2   56.89   20.50
   3  34   2  273.17   31.30
  -3  34  -2  182.28   30.50
   4 -34   2   25.20   17.50
  -4  34  -2  -28.20   17.70
   4  34   2    1.50   19.10
   5 -34   2   19.10   18.10
  -5  34  -2   -5.30   18.70
   5  34   2   17.90   19.40
   6 -34   2    4.50   17.90
   6  34   2  -18.80   17.80
  -6  34  -2    4.70   19.00
   7 -34   2  250.67   34.10
   7  34   2  239.98   32.40
  -7  34  -2  211.68   31.80
   8 -34   2   97.49   23.40
  -8  34  -2   84.09   23.10
   8  34   2   66.29   22.80
   9 -35  -2   23.70   18.30
  -9  35   2   34.70   20.50
   8 -35  -2   -5.40   16.40
  -8  35   2   -1.40   18.50
   8  35  -2   17.60   22.60
   7 -35  -2  169.88   28.30
   7  35  -2  139.29   27.60
  -7  35   2  193.08   29.90
   6 -35  -2   78.29   19.20
  -6  35   2  117.59   23.70
   6  35  -2  116.49   24.80
   5  35  -2  -31.50   18.20
  -5  35   2  -13.80   18.00
   4  35  -2  -15.40   18.40
  -4  35   2  -24.60   16.60
   3 -35  -2   20.40   18.30
   3  35  -2    2.20   20.00
  -3  35   2    2.00   17.40
   2 -35  -2    2.90   17.30
   2  35  -2    9.00   19.40
  -2  35   2    5.90   18.40
   1 -35  -2   73.89   19.50
  -1  35   2   88.89   22.00
   1  35  -2  137.39   24.40
   0  35   2   -6.90   18.10
   0  35  -2   13.80   19.80
  -1  35  -2    7.40   19.80
   1  35   2   24.30   19.30
   2  35   2   39.40   19.60
  -2  35  -2   30.80   20.30
  -3  35  -2   17.60   19.30
   3  35   2    6.10   19.10
  -4  35  -2    7.50   19.40
   4  35   2   25.90   20.20
   5 -35   2   19.20   18.60
   5  35   2    7.90   19.50
  -5  35  -2   -2.00   18.50
   6 -35   2   -4.40   18.00
  -6  35  -2    7.70   18.60
   6  35   2  -35.40   17.80
   7 -35   2   25.40   19.90
  -7  35  -2   16.90   18.90
   7  35   2  -17.70   19.10
   7 -36  -2   63.19   19.50
  -7  36   2   36.60   20.90
   7  36  -2   55.19   23.30
  -6  36   2   30.00   20.80
   6  36  -2   17.20   21.80
   5  36  -2  -16.90   19.60
  -5  36   2   28.40   19.10
  -4  36   2  245.48   32.80
   4  36  -2  220.28   32.60
   3 -36  -2   -6.80   17.70
   3  36  -2  -14.30   20.10
  -3  36   2   19.40   19.00
   2 -36  -2  364.06   31.20
  -2  36   2  393.36   35.80
   2  36  -2  393.76   36.50
  -1  36   2  181.68   30.00
   1  36  -2  239.28   32.50
   0  36  -2   35.30   21.60
   0  36   2   23.90   20.00
  -1  36  -2   38.50   22.60
   1  36   2   57.99   21.10
  -2  36  -2   47.80   21.10
   2  36   2   70.29   21.50
  -3  36  -2    3.10   19.90
   3  36   2  -10.70   19.00
   4  36   2   93.99   22.80
  -4  36  -2  167.68   26.80
   5  36   2  -14.50   19.10
  -5  36  -2    0.40   19.30
   6 -36   2    4.80   24.10
  -6  36  -2   13.90   18.70
   6  36   2  -34.30   17.70
  -6  37   2   40.50   21.00
   6  37  -2    3.10   22.10
  -5  37   2  393.46   35.90
   5  37  -2  366.26   38.00
   4  37  -2  231.58   34.80
  -4  37   2  319.47   34.60
   3 -37  -2  277.27   30.30
   3  37  -2  248.58   33.90
  -3  37   2  213.88   31.40
   2  37  -2   56.29   22.40
  -2  37   2   38.60   21.60
  -1  37   2  -39.80   18.20
   1  37  -2   41.70   21.50
   0  37   2   23.90   20.90
   0  37  -2   76.99   23.40
   1  37   2  307.07   34.80
  -1  37  -2  334.77   36.00
  -2  37  -2  249.28   34.30
   2  37   2  258.17   33.20
   3  37   2  106.39   24.00
  -3  37  -2  155.98   26.40
  -4  37  -2   28.40   21.20
   4  37   2   42.00   21.90
   4 -38  -2  118.39   24.10
  -4  38   2  123.69   24.00
   4  38  -2  111.99   27.10
  -3  38   2  324.97   34.50
   3  38  -2  345.67   38.00
   2  38  -2  268.27   34.40
  -2  38   2  299.97   35.50
   1  38  -2   17.90   21.00
  -1  38   2   23.80   20.50
   0  38   2   26.00   21.80
   0  38  -2   -8.40   20.00
  -1  38  -2  390.86   37.90
   1  38   2  458.85   38.70
   2  38   2  154.98   25.60
  -2  38  -2  154.88   27.00
   3  38   2  174.38   27.30
  -3  38  -2   82.79   24.40
  20   0  -3    9.60   22.50
 -20   0   3    0.30   26.10
  19   0  -3   -2.10   20.50
 -19   0   3   11.60   25.00
 -18   0   3    0.90   22.80
  18   0  -3    6.50   20.20
  17   0  -3   26.10   20.20
 -17   0   3   -0.10   21.10
  16   0  -3   14.70   18.20
 -16   0   3    2.60   18.90
  15   0  -3   40.50   17.90
 -15   0   3   10.40   17.00
 -14   0   3   43.80   17.00
  14   0  -3   22.00   15.70
  13   0  -3   -7.20   13.90
 -13   0   3   -5.70   13.50
  12   0  -3   -2.00   12.60
 -12   0   3   -8.90   12.20
 -11   0   3    5.70   11.80
  11   0  -3   17.70   11.50
 -10   0   3   -7.80   10.30
  10   0  -3   33.90   11.20
   9   0  -3   -4.00    9.30
  -9   0   3   15.90   10.20
   8   0  -3   -1.90    8.50
  -8   0   3    1.90    9.30
  -7   0   3    4.40    8.70
   7   0  -3   -0.30    8.00
  -7   0   3    5.50    8.50
  -6   0   3   -2.90    6.90
   6   0  -3   -8.30    7.10
  -6   0   3    3.20    8.10
   5   0  -3    3.30    7.00
  -5   0   3    8.00    7.70
  -5   0   3    4.10    6.20
   4   0  -3   -0.50    6.30
  -4   0   3   -5.30    7.00
  -4   0   3   -2.60    6.60
   4   0  -3    9.90    6.90
   3   0  -3    7.90    6.10
  -3   0   3    1.70    6.90
  -3   0   3   -3.90    6.30
   3   0  -3    2.50    5.90
   3   0  -3   -5.80    6.70
   2   0  -3   -2.60    5.90
   2   0  -3   -6.50    5.00
  -2   0   3    7.40    6.10
  -2   0   3   -0.10    5.70
   2   0  -3   -2.50    6.30
   1   0  -3   -2.90    6.50
  -1   0   3   11.70    6.20
   1   0  -3   -1.60    6.00
   1   0  -3   -2.10    4.10
   0   0  -3   -1.20    6.20
   0   0  -3   -4.90    5.70
   1   0   3   10.20    7.00
  -1   0  -3   -4.20    6.20
   2   0   3    1.50    4.80
  -2   0  -3    5.70    7.00
   2   0   3    7.60    7.70
   3   0   3   11.60    8.30
   3   0   3    8.80    6.10
  -3   0  -3    0.60    7.20
  -3   0  -3    9.00    5.00
  -4   0  -3    4.00    5.60
   4   0   3    9.50    6.90
  -4   0  -3   -0.10    7.80
  -5   0  -3    3.70    8.20
   5   0   3    2.70    7.90
  -5   0  -3   -4.40    6.10
  -6   0  -3    0.50    8.60
   6   0   3   -4.80    9.00
  -6   0  -3   10.70    7.20
   7   0   3    9.90   11.40
  -7   0  -3   16.40    8.40
  -7   0  -3    8.40   10.00
  -8   0  -3    0.20    8.90
  -8   0  -3    0.90   10.10
  -9   0  -3   15.50   11.40
  -9   0  -3    9.00    9.70
 -10   0  -3  -10.00   11.70
 -10   0  -3   -1.50   11.20
 -11   0  -3   16.90   14.50
 -11   0  -3   -7.00   12.10
 -12   0  -3    5.90   15.70
 -12   0  -3   -2.70   13.50
  12   0   3    1.50   15.50
  13   0   3    3.80   15.90
 -13   0  -3    3.40   14.80
 -13   0  -3  -13.30   15.90
  14   0   3   16.60   18.30
 -14   0  -3  -21.30   16.80
  15   0   3    2.40   18.10
 -15   0  -3   28.60   19.10
 -16   0  -3  -21.40   18.10
  16   0   3   21.30   20.90
  17   0   3   17.90   20.40
 -17   0  -3    4.80   20.80
  20  -1  -3   -6.20   23.00
  20   1  -3   38.60   23.10
 -20   1   3   40.80   27.00
 -19  -1   3   44.20   25.70
  19  -1  -3    3.40   21.50
 -19   1   3   34.90   24.60
  19   1  -3   23.50   22.70
  18  -1  -3   10.10   19.90
 -18  -1   3  -13.10   22.00
  18   1  -3   -8.80   19.30
 -18   1   3    8.00   21.40
 -17  -1   3  135.89   25.00
  17  -1  -3  164.88   25.00
 -17   1   3  186.48   30.70
  17   1  -3  172.28   25.20
 -16  -1   3  369.96   33.40
  16  -1  -3  388.16   34.00
  16   1  -3  416.46   35.00
 -16   1   3  429.06   34.80
  15  -1  -3  517.25   34.00
 -15  -1   3  463.15   33.60
 -15   1   3  549.95   35.40
  15   1  -3  524.55   34.10
  14  -1  -3  204.58   25.80
 -14  -1   3  185.58   25.20
 -14   1   3  229.78   26.70
  14   1  -3  237.08   27.10
 -13  -1   3   22.10   14.60
  13  -1  -3   25.60   14.50
 -13   1   3   20.30   14.50
  13   1  -3   36.10   14.90
 -12  -1   3   -1.70   12.60
  12  -1  -3   15.00   13.10
 -12   1   3    9.30   12.60
  12   1  -3   17.70   12.90
 -11  -1   3  354.56   24.70
  11  -1  -3  398.06   24.10
  11   1  -3  427.46   23.90
 -11   1   3  386.76   24.50
 -10  -1   3  889.01   33.80
  10  -1  -3 1009.60   34.30
 -10   1   3  938.51   34.30
  10   1  -3  988.00   33.40
   9  -1  -3  378.96   20.60
  -9  -1   3  334.57   20.40
  -9   1   3  376.36   21.40
   9   1  -3  363.76   19.90
   8  -1  -3 1009.50   32.20
  -8  -1   3 1020.50   33.00
  -8   1   3 1022.60   32.90
   8   1  -3  979.00   31.20
   7  -1  -3    1.40    8.30
  -7  -1   3    6.90    8.50
  -7  -1   3    0.40    8.00
  -7   1   3    4.20    8.70
   7   1  -3   -6.00    7.70
   6  -1  -3  148.79   14.40
   6  -1  -3  139.19   13.40
  -6  -1   3  145.89   14.30
  -6   1   3  144.59   13.40
  -6   1   3  135.39   13.50
   6   1  -3  161.48   12.90
  -5  -1   3  672.53   21.60
   5  -1  -3  688.73   22.30
  -5  -1   3  652.23   22.70
   5   1  -3  642.54   21.50
  -5   1   3  696.63   22.40
  -4  -1   3  470.85   17.40
  -4  -1   3  481.15   17.80
   4  -1  -3  477.45   16.80
   4  -1  -3  440.96   17.60
   4   1  -3  458.25   17.10
  -4   1   3  433.66   20.50
  -4   1   3  432.76   17.30
   4   1  -3  486.95   16.70
   3  -1  -3   69.29    9.40
   3  -1  -3   66.49   10.30
   3  -1  -3   73.49    8.70
  -3  -1   3   65.29   10.40
  -3  -1   3   62.79    8.40
   3   1  -3   84.89   10.90
   3   1  -3   64.09    9.80
  -3   1   3   56.19    7.40
   3   1  -3   69.39    9.30
   2  -1  -3  270.17   11.10
  -2  -1   3  279.27   13.50
  -2  -1   3  288.47   12.80
   2  -1  -3  261.87   13.80
   2  -1  -3  291.17   13.30
   2   1  -3  279.67   13.50
  -2   1   3  274.27   11.50
   2   1  -3  283.87   12.20
   2   1  -3  281.07   11.80
  -2   1   3  292.17   13.20
  -1  -1   3 1991.00   46.60
   1  -1  -3 2063.79   47.70
   1  -1  -3 2027.70   44.10
   1  -1  -3 2050.89   47.20
   1   1  -3 1972.70   46.50
   1   1  -3 1976.90   47.40
  -1   1   3 2047.10   49.20
   0  -1  -3  356.66   15.00
   0  -1  -3  340.27   14.30
   0  -1   3  376.46   14.00
   0   1   3  364.56   15.50
   0   1  -3  344.87   14.40
  -1  -1  -3  271.67   13.40
  -1   1  -3  258.27   13.50
  -1   1  -3  253.37    8.90
   1   1   3  255.47   13.80
   2  -1   3  797.12   20.70
  -2  -1  -3  790.22   24.20
  -2   1  -3  821.32   24.40
  -2   1  -3  802.92   20.30
   2   1   3  840.72   25.00
   3  -1   3    9.00    7.80
  -3  -1  -3   10.20    4.90
  -3  -1  -3   20.30    7.70
   3  -1   3   13.60    6.50
   3   1   3   13.00    8.70
   3   1   3   -1.50    5.80
  -3   1  -3    0.90    5.20
  -3   1  -3   -1.20    7.30
  -4  -1  -3    1.70    7.60
   4  -1   3   -3.60    6.70
  -4  -1  -3    0.40    5.40
   4   1   3    1.10    6.50
  -4   1  -3    0.30    7.90
  -4   1  -3    7.10    5.90
   4   1   3   10.20    9.30
   5  -1   3  143.79   12.80
  -5  -1  -3  164.38   14.60
  -5  -1  -3  162.38   11.30
   5   1   3  163.48   12.60
  -5   1  -3  162.08   11.70
  -5   1  -3  180.08   14.90
  -6  -1  -3  199.58   13.30
  -6  -1  -3  208.48   16.40
   6  -1   3  178.88   15.50
   6   1   3  219.98   15.40
  -6   1  -3  207.38   16.30
  -6   1  -3  208.78   13.70
  -7  -1  -3  602.14   25.60
  -7  -1  -3  640.64   22.50
   7   1   3  630.54   23.70
  -7   1  -3  633.64   25.60
  -7   1  -3  591.74   22.40
  -8  -1  -3  494.75   21.20
  -8  -1  -3  432.56   23.70
  -8   1  -3  488.25   21.60
  -8   1  -3  475.35   24.50
  -9  -1  -3  189.88   17.20
  -9  -1  -3  207.18   20.00
  -9   1  -3  195.98   17.60
  -9   1  -3  199.88   20.30
 -10  -1  -3   30.50   11.80
 -10  -1  -3   21.30   13.20
 -10   1  -3   25.20   13.60
 -10   1  -3   27.50   11.70
 -11  -1  -3   32.20   12.80
 -11  -1  -3   58.69   16.40
 -11   1  -3   30.60   13.50
 -11   1  -3   35.30   15.50
 -12  -1  -3  323.97   28.10
  12  -1   3  239.18   26.50
 -12  -1  -3  290.77   24.30
 -12   1  -3  306.07   28.00
  12   1   3  252.57   26.60
 -12   1  -3  288.17   24.50
 -13  -1  -3  176.38   23.50
  13  -1   3  206.88   27.80
 -13  -1  -3  218.38   28.00
  13   1   3  176.08   26.00
 -13   1  -3  234.38   28.10
 -13   1  -3  235.98   24.80
  14  -1   3   12.80   17.60
 -14  -1  -3  -15.20   16.00
  14   1   3   17.00   18.00
 -14   1  -3   -4.50   16.50
 -15  -1  -3   46.00   17.90
  15  -1   3   55.89   19.80
  15   1   3   33.50   19.00
 -15   1  -3   35.60   18.60
  16  -1   3   23.80   21.20
 -16  -1  -3   11.10   20.70
 -16   1  -3   10.30   18.60
  16   1   3   12.30   20.60
  17  -1   3   27.50   22.10
 -17   1  -3   22.00   22.70
  17   1   3   23.70   21.80
  20  -2  -3   67.29   26.00
 -20   2   3  109.09   29.90
  19  -2  -3  105.49   26.30
  19   2  -3   74.09   22.60
 -19   2   3   33.30   24.10
  18  -2  -3  111.49   26.00
 -18   2   3  131.79   26.90
  18   2  -3  145.29   25.00
  17  -2  -3 1188.98   53.49
 -17  -2   3 1036.90   51.29
  17   2  -3 1141.39   49.70
 -17   2   3 1096.79   52.19
 -16  -2   3   37.50   20.10
  16  -2  -3   44.90   19.00
  16   2  -3   29.50   19.40
 -16   2   3   18.70   18.90
 -15  -2   3   84.59   19.90
  15  -2  -3  126.39   21.10
  15   2  -3   90.79   19.40
 -15   2   3   77.19   19.50
 -14  -2   3  461.15   31.00
  14  -2  -3  386.66   30.10
  14   2  -3  442.96   29.70
 -14   2   3  408.76   30.00
  13  -2  -3    6.60   13.80
 -13  -2   3    1.10   13.70
  13   2  -3    8.20   14.00
 -13   2   3   21.80   14.40
 -12  -2   3   16.80   13.60
  12  -2  -3   46.90   14.00
 -12   2   3   17.40   12.80
  12   2  -3   14.60   12.80
 -11  -2   3 1832.62   54.09
  11  -2  -3 1863.01   54.19
 -11   2   3 1803.02   53.69
  11   2  -3 1860.31   52.49
 -10  -2   3  419.46   23.80
  10  -2  -3  494.15   24.30
 -10   2   3  454.35   24.30
  10   2  -3  472.25   23.00
  -9  -2   3  328.87   20.50
   9  -2  -3  346.57   20.50
   9   2  -3  347.67   19.10
  -9   2   3  304.67   19.90
   9   2  -3  315.57   18.00
   8  -2  -3  699.43   26.40
  -8  -2   3  693.93   26.30
   8   2  -3  697.33   24.70
  -8   2   3  709.43   26.60
  -7  -2   3    3.30    7.60
  -7  -2   3    2.30    8.80
   7  -2  -3   -8.10    7.90
   7   2  -3   23.30    8.20
  -7   2   3    9.70    8.70
  -6  -2   3  970.00   29.90
   6  -2  -3  957.50   29.50
   6  -2  -3 1024.70   32.40
   6   2  -3  949.51   28.00
  -6   2   3  957.70   29.50
  -6   2   3 1003.30   29.90
  -5  -2   3 1275.97   33.70
  -5  -2   3 1289.97   35.00
   5  -2  -3 1313.07   34.90
  -5   2   3 1276.67   34.60
   5   2  -3 1266.97   33.40
  -4  -2   3 2680.13   61.09
   4  -2  -3 2605.14   61.69
   4  -2  -3 2695.03   60.99
   4   2  -3 2641.54   61.69
  -4   2   3 2670.63   61.09
   4   2  -3 2588.94   60.59
   4   2  -3 2629.94   59.09
   3  -2  -3  129.39   10.50
   3  -2  -3  157.38   12.40
  -3  -2   3  140.09   12.20
   3  -2  -3  145.09   11.10
   3   2  -3  120.59   11.20
  -3   2   3  126.09   11.10
   3   2  -3  146.49   10.80
   3   2  -3  135.99    9.90
   2  -2  -3 4742.03  103.09
   2  -2  -3 4690.03  101.09
  -2  -2   3 4791.62  101.89
   2  -2  -3 4647.23  103.49
  -2  -2   3 4743.93  103.09
  -2   2   3 4857.21  103.19
   2   2  -3 4725.43  101.69
  -2   2   3 4660.03  101.19
   2   2  -3 4631.44  102.89
   1  -2  -3  596.94   19.20
   1  -2  -3  567.74   18.70
  -1  -2   3  579.04   19.10
  -1  -2   3  581.94   17.70
   1  -2  -3  559.34   14.90
  -1   2   3  561.24   15.10
   1   2  -3  557.24   17.40
  -1   2   3  603.94   19.40
   1   2  -3  571.34   18.60
   0  -2  -3 1091.59   29.30
   0  -2  -3 1108.69   29.60
   0  -2   3 1159.68   28.90
   0   2  -3 1117.19   28.70
   0   2   3 1102.69   29.80
  -1  -2  -3  613.24   19.80
  -1   2  -3  590.64   16.20
  -1   2  -3  609.84   19.60
   1   2   3  619.74   19.80
   1   2   3  604.44   20.00
   2  -2   3  183.78   10.40
  -2  -2  -3  203.68   13.10
   2   2   3  199.88   14.30
   2   2   3  211.58   13.90
  -2   2  -3  175.78    9.40
  -2   2  -3  203.18   13.30
  -3  -2  -3  114.29    8.00
  -3  -2  -3  117.09   12.70
   3  -2   3  103.29   10.40
  -3   2  -3  130.19    9.60
   3   2   3  117.69   13.50
   3   2   3  112.79    9.20
  -3   2  -3  112.29   12.50
  -4  -2  -3  194.28   14.60
   4  -2   3  186.28   12.60
  -4  -2  -3  199.08   10.90
   4   2   3  210.38   12.10
  -4   2  -3  195.48   11.80
   4   2   3  227.48   14.70
  -4   2  -3  213.58   15.20
   5  -2   3  171.88   13.30
  -5  -2  -3  142.89   14.30
  -5  -2  -3  162.98   11.50
  -5   2  -3  176.08   12.10
   5   2   3  150.78   12.30
  -5   2  -3  159.48   14.90
  -6  -2  -3 1314.97   37.90
   6  -2   3 1299.67   36.20
  -6  -2  -3 1314.57   34.40
  -6   2  -3 1278.77   38.40
   6   2   3 1319.17   35.20
  -6   2  -3 1273.47   35.00
  -7  -2  -3 1110.69   31.50
  -7  -2  -3 1112.69   35.30
   7   2   3 1053.89   32.00
  -7   2  -3 1046.80   35.00
  -7   2  -3 1072.49   32.00
  -8  -2  -3 2678.93   68.89
  -8  -2  -3 2708.53   65.19
  -8   2  -3 2656.63   69.29
  -8   2  -3 2623.54   65.49
  -9  -2  -3   -5.00    9.50
  -9  -2  -3  -15.40   10.80
  -9   2  -3   -4.00   11.30
  -9   2  -3    5.50   10.20
 -10  -2  -3  267.67   23.70
 -10  -2  -3  292.47   20.90
 -10   2  -3  240.18   23.30
 -10   2  -3  250.87   19.90
 -11  -2  -3   -0.70   14.10
 -11  -2  -3   -1.00   12.00
 -11   2  -3   22.10   14.80
 -11   2  -3   -2.40   12.10
 -12  -2  -3  922.61   36.40
 -12  -2  -3  937.31   41.00
  12  -2   3  873.01   40.50
 -12   2  -3  960.40   37.20
  12   2   3  837.92   39.40
 -12   2  -3  941.01   41.10
 -13  -2  -3   -0.70   14.80
  13  -2   3   -2.20   16.30
 -13  -2  -3   23.60   17.90
  13   2   3  -14.40   15.00
 -13   2  -3   17.70   15.30
 -14  -2  -3 1013.40   46.80
 -14  -2  -3  992.90   44.10
  14  -2   3  936.81   47.00
  14   2   3  975.60   45.30
 -14   2  -3 1042.60   43.20
 -15  -2  -3   20.80   18.90
  15  -2   3   20.90   19.10
  15   2   3   24.20   18.00
 -15   2  -3  -17.80   18.50
  16  -2   3   22.80   21.40
  16   2   3   45.60   20.30
 -16   2  -3   32.30   20.10
  17  -2   3    4.30   20.50
 -17   2  -3   33.10   22.40
  17   2   3   20.60   21.00
  20  -3  -3  244.38   32.80
 -20   3   3  205.08   34.00
  19  -3  -3  119.29   26.60
 -19   3   3  105.29   27.50
  19   3  -3  108.89   24.50
  18  -3  -3   26.60   20.60
 -18   3   3    2.50   22.20
  18   3  -3   25.70   19.70
  17  -3  -3   28.30   19.90
 -17   3   3   44.40   21.90
  17   3  -3   68.59   20.80
 -16  -3   3  272.77   31.70
  16  -3  -3  271.97   31.80
  16   3  -3  237.08   29.20
 -16   3   3  217.18   29.60
 -15  -3   3  730.33   39.60
  15  -3  -3  750.32   39.60
 -15   3   3  729.83   39.20
  15   3  -3  799.12   38.00
 -14  -3   3  187.48   25.80
  14  -3  -3  158.98   25.50
 -14   3   3  202.98   25.70
  14   3  -3  233.78   25.20
  13  -3  -3  163.08   23.90
 -13  -3   3  228.68   25.10
 -13   3   3  263.87   24.30
  13   3  -3  217.38   23.20
  12  -3  -3  239.68   23.00
 -12  -3   3  196.88   22.50
  12   3  -3  190.48   21.40
 -12   3   3  177.18   21.80
 -11  -3   3   28.40   12.90
  11  -3  -3   15.20   12.00
  11   3  -3   25.50   11.90
 -11   3   3   43.90   12.70
 -10  -3   3 1785.82   51.39
  10  -3  -3 1822.42   51.79
 -10   3   3 1736.53   50.89
  10   3  -3 1781.92   48.90
   9  -3  -3 2340.47   60.69
  -9  -3   3 2258.97   59.89
   9   3  -3 2265.97   57.49
   9   3  -3 2293.67   55.69
  -9   3   3 2175.68   59.29
  -8  -3   3 1827.42   47.10
  -8  -3   3 1770.32   49.00
   8  -3  -3 1753.22   48.90
  -8   3   3 1849.21   49.00
   8   3  -3 1806.32   46.40
  -7  -3   3 1746.53   46.90
   7  -3  -3 1752.92   47.00
  -7   3   3 1802.72   46.80
   7   3  -3 1724.03   44.50
  -6  -3   3  257.17   16.90
  -6  -3   3  206.98   12.90
   6  -3  -3  288.57   16.70
   6   3  -3  270.27   14.40
  -6   3   3  281.27   19.20
  -6   3   3  274.47   16.10
  -5  -3   3 1796.02   43.60
   5  -3  -3 1810.62   45.30
  -5   3   3 1791.32   44.60
   5   3  -3 1735.43   43.10
   4  -3  -3   10.40    7.60
  -4  -3   3   20.50    7.40
   4  -3  -3   13.80    6.80
  -4   3   3   15.70    7.20
   4   3  -3   13.60    5.70
   4   3  -3   13.00    6.70
  -3  -3   3  744.93   22.20
   3  -3  -3  706.93   23.10
  -3  -3   3  775.32   20.60
   3  -3  -3  790.62   21.90
   3   3  -3  738.13   22.00
  -3   3   3  766.42   21.80
   3   3  -3  772.52   20.40
   3   3  -3  762.22   22.20
   2  -3  -3 3339.47   75.29
  -2  -3   3 3428.06   74.69
   2  -3  -3 3298.77   74.99
   2  -3  -3 3311.07   72.69
  -2  -3   3 3352.36   72.99
   2   3  -3 3290.17   72.89
  -2   3   3 3352.86   72.89
   2   3  -3 3226.38   74.19
  -2   3   3 3443.06   75.79
  -1  -3   3 2838.22   63.69
   1  -3  -3 2781.72   60.49
   1  -3  -3 2843.32   63.89
  -1  -3   3 2795.32   62.59
   1  -3  -3 2807.32   64.09
  -1   3   3 2784.62   60.49
   1   3  -3 2743.53   63.49
   1   3  -3 2768.22   62.39
  -1   3   3 2879.01   64.29
   0  -3   3 1238.78   32.20
   0  -3  -3 1301.67   33.20
   0  -3  -3 1268.47   33.20
   0   3  -3 1242.28   32.20
   0   3   3 1325.77   33.50
   0   3   3 1404.46   35.90
   1  -3   3  263.47   16.80
  -1  -3  -3  235.58   13.20
  -1  -3  -3  243.78   13.20
  -1   3  -3  232.78   10.50
   1   3   3  248.78   14.00
   1   3   3  251.37   14.00
  -1   3  -3  220.58   13.10
  -2  -3  -3 1959.80   48.40
   2  -3   3 2007.80   46.10
   2   3   3 2022.50   48.40
  -2   3  -3 2048.10   48.90
   2   3   3 2071.59   49.00
  -2   3  -3 1951.30   45.70
   3  -3   3   44.70    7.60
  -3  -3  -3   33.60    8.10
  -3   3  -3   36.50    8.50
   3   3   3   40.80    8.40
   3   3   3   37.50    6.00
  -3   3  -3   47.50    6.70
   4  -3   3   94.39   11.40
  -4  -3  -3   87.19    9.30
  -4  -3  -3   82.99   12.70
  -4   3  -3  101.89   13.00
   4   3   3  110.09   12.80
   4   3   3   95.09   10.80
  -4   3  -3  100.09   10.50
  -5  -3  -3  477.15   20.00
  -5  -3  -3  446.76   16.40
   5  -3   3  417.26   18.10
   5   3   3  412.06   17.20
  -5   3  -3  433.66   17.50
  -5   3  -3  436.66   20.10
  -6  -3  -3  708.63   22.50
   6  -3   3  707.93   25.00
  -6  -3  -3  707.23   26.00
  -6   3  -3  695.03   23.30
  -6   3  -3  662.23   26.50
   6   3   3  695.33   23.60
  -7  -3  -3 2878.61   67.89
  -7  -3  -3 2830.92   71.69
   7   3   3 2935.11   68.69
  -7   3  -3 2876.71   72.79
  -7   3  -3 2849.81   68.89
  -8  -3  -3 1467.35   40.80
  -8  -3  -3 1476.55   44.40
  -8   3  -3 1482.15   45.20
  -8   3  -3 1483.25   41.60
  -9  -3  -3  284.07   18.70
  -9  -3  -3  275.37   21.60
  -9   3  -3  239.38   21.70
  -9   3  -3  222.88   18.40
 -10  -3  -3   54.99   14.90
 -10  -3  -3   55.49   12.50
 -10   3  -3   42.10   12.40
 -10   3  -3   78.79   15.50
 -11  -3  -3  314.07   22.70
 -11  -3  -3  284.47   25.80
 -11   3  -3  252.37   22.10
 -11   3  -3  273.47   25.80
  12  -3   3 1048.90   45.00
 -12  -3  -3 1133.39   44.40
 -12  -3  -3 1133.09   40.60
 -12   3  -3 1088.89   40.30
 -12   3  -3 1063.59   45.00
 -13  -3  -3  406.06   31.70
  13  -3   3  359.86   31.20
 -13  -3  -3  332.97   28.10
 -13   3  -3  410.76   28.80
  13   3   3  359.36   29.70
 -14  -3  -3  523.55   34.60
  14  -3   3  518.05   37.20
 -14  -3  -3  562.54   38.00
 -14   3  -3  464.85   33.90
  14   3   3  549.25   35.30
  15  -3   3   31.80   19.90
 -15   3  -3   35.30   19.10
  15   3   3   81.59   20.50
  16  -3   3   49.99   21.70
  16   3   3   20.40   18.90
 -16   3  -3  -11.10   18.00
  17  -3   3   72.79   25.00
 -17   3  -3  119.09   26.90
  17   3   3  109.29   23.90
 -20   4   3   38.00   26.30
  19  -4  -3  182.08   29.40
 -19   4   3  114.49   27.20
  18  -4  -3  114.49   26.30
  18   4  -3  113.09   23.40
 -18   4   3  119.89   26.20
  17  -4  -3  169.68   25.80
 -17   4   3  151.18   25.20
  17   4  -3  190.28   31.20
  16  -4  -3   15.60   18.30
 -16   4   3  -43.20   16.20
  16   4  -3    1.70   16.40
  15  -4  -3   29.70   17.20
  15   4  -3   60.49   17.70
 -15   4   3   50.49   18.10
 -14  -4   3   51.99   17.50
  14  -4  -3   62.99   18.50
  14   4  -3   69.29   16.50
 -14   4   3   56.19   17.20
  13  -4  -3   34.00   15.40
 -13  -4   3   -1.20   14.20
  13   4  -3   17.50   14.30
 -13   4   3   12.10   13.50
 -12  -4   3   21.20   13.70
  12  -4  -3  -13.20   12.10
  12   4  -3   23.10   12.80
 -12   4   3    8.60   12.40
 -11  -4   3 2143.49   61.19
  11  -4  -3 2171.38   62.09
 -11   4   3 2140.49   60.59
  11   4  -3 2213.48   58.29
  10  -4  -3 1272.47   40.10
 -10  -4   3 1127.59   39.00
  10   4  -3 1147.39   39.00
  10   4  -3 1126.49   35.80
 -10   4   3 1194.58   38.80
   9  -4  -3  357.66   21.10
  -9  -4   3  324.27   21.30
   9   4  -3  322.77   18.70
  -9   4   3  341.87   20.90
   9   4  -3  339.67   17.30
  -8  -4   3 1725.53   47.70
   8  -4  -3 1639.84   47.50
  -8  -4   3 1723.83   44.90
   8   4  -3 1693.13   44.30
   8   4  -3 1760.92   43.00
  -8   4   3 1744.93   47.20
   7  -4  -3 1294.27   37.10
  -7   4   3 1170.58   35.70
   7   4  -3 1222.88   33.60
  -6  -4   3   11.60    7.10
   6  -4  -3   12.10    8.70
  -6   4   3    5.90    8.30
   6   4  -3    3.20    7.40
   5  -4  -3    3.30    7.70
   5  -4  -3    3.30    6.50
  -5  -4   3   15.70    7.20
  -5   4   3    8.40    7.60
   5   4  -3    8.40    6.90
   4  -4  -3  801.12   25.50
  -4  -4   3  819.52   23.50
   4  -4  -3  859.11   24.20
  -4   4   3  814.32   24.20
   4   4  -3  816.02   21.10
   3  -4  -3  700.03   20.40
   3  -4  -3  653.33   22.10
  -3  -4   3  684.43   20.80
  -3  -4   3  687.43   18.60
   3   4  -3  701.83   18.40
   3   4  -3  673.63   20.20
  -3   4   3  701.33   25.70
  -3   4   3  654.73   20.30
   2  -4  -3 2401.56   53.69
   2  -4  -3 2404.16   56.29
   2  -4  -3 2423.06   56.09
  -2  -4   3 2397.76   55.09
  -2  -4   3 2407.76   53.49
   2   4  -3 2335.37   54.89
  -2   4   3 2386.06   53.69
  -2   4   3 2480.75   56.39
   2   4  -3 2353.56   53.39
  -1  -4   3  354.86   14.40
   1  -4  -3  339.57   11.30
   1  -4  -3  352.76   15.30
   1  -4  -3  351.46   15.50
  -1  -4   3  369.06   13.50
  -1   4   3  337.87   11.70
   1   4  -3  349.37   13.20
  -1   4   3  346.77   16.40
   0  -4   3 1409.66   34.50
   0  -4  -3 1380.96   35.40
   0  -4  -3 1402.26   35.40
   0   4  -3 1394.06   34.60
   0   4   3 1417.46   35.80
   0   4   3 1383.56   35.30
  -1  -4  -3 1118.49   30.20
   1  -4   3 1138.09   29.50
  -1  -4  -3 1122.29   30.00
  -1   4  -3 1098.29   28.00
  -1   4  -3 1080.89   29.80
   1   4   3 1137.99   30.50
   1   4   3 1141.29   30.70
  -2  -4  -3 4195.78   93.79
   2  -4   3 4182.88   91.69
  -2   4  -3 4094.09   91.49
  -2   4  -3 4104.59   93.89
   2   4   3 4307.67   93.89
   2   4   3 4303.87   93.39
   3  -4   3  444.56   16.70
  -3  -4  -3  427.46   18.10
   3   4   3  451.85   14.20
  -3   4  -3  447.46   18.70
   3   4   3  477.85   18.60
  -3   4  -3  428.06   15.70
   3   4   3  478.65   18.30
   4  -4   3    1.40    7.70
  -4  -4  -3   28.90    8.30
  -4   4  -3   26.30    8.60
  -4   4  -3   12.00    7.00
   4   4   3    6.70    7.30
   4   4   3    6.60    7.90
   5  -4   3  191.58   14.50
  -5  -4  -3  208.08   15.40
  -5   4  -3  200.88   16.30
   5   4   3  210.48   13.50
  -5   4  -3  212.78   13.70
  -6  -4  -3  402.46   17.20
   6  -4   3  407.76   23.00
  -6  -4  -3  383.36   19.70
   6   4   3  416.16   18.20
  -6   4  -3  393.66   18.20
  -6   4  -3  369.76   20.10
  -7  -4  -3  142.49   16.30
  -7  -4  -3  101.09   13.50
   7   4   3  108.59   15.10
  -7   4  -3  131.19   16.60
  -7   4  -3  122.09   14.30
  -8  -4  -3  498.55   24.30
  -8  -4  -3  485.65   21.60
  -8   4  -3  469.95   21.70
  -8   4  -3  466.85   24.70
  -9  -4  -3  635.94   28.90
  -9  -4  -3  680.03   26.10
  -9   4  -3  650.63   29.90
  -9   4  -3  633.54   27.00
 -10  -4  -3 1333.47   44.80
 -10  -4  -3 1384.36   41.10
 -10   4  -3 1275.27   45.30
 -10   4  -3 1249.57   40.90
 -11  -4  -3  195.68   20.70
 -11  -4  -3  228.98   24.20
 -11   4  -3  193.78   21.20
 -11   4  -3  206.48   24.30
 -12  -4  -3  418.66   29.60
  12  -4   3  352.96   30.20
 -12   4  -3  391.46   26.60
 -12   4  -3  375.66   30.00
 -13  -4  -3  358.26   30.60
  13  -4   3  351.76   30.90
  13   4   3  281.67   27.90
 -13   4  -3  342.27   27.80
 -14  -4  -3  643.04   38.40
  14  -4   3  550.54   38.60
 -14   4  -3  539.95   34.10
  14   4   3  491.55   33.80
  15  -4   3   -0.10   19.50
 -15   4  -3    4.60   17.80
  15   4   3   30.40   18.20
  16  -4   3  244.08   33.80
 -16   4  -3  248.98   31.80
  16   4   3  219.28   31.90
  17  -4   3   23.90   22.50
  17   4   3   20.60   20.10
 -17   4  -3   25.40   21.80
  19  -5  -3   97.49   26.70
 -19   5   3   43.20   24.30
  18  -5  -3  220.08   35.70
  18   5  -3  288.47   36.00
 -18   5   3  222.38   35.20
  17  -5  -3  119.29   24.60
  17   5  -3   94.59   21.70
 -17   5   3   70.29   23.30
  16  -5  -3   26.40   18.90
 -16   5   3    6.00   18.30
  16   5  -3    2.00   17.00
  15  -5  -3  158.48   23.10
 -15   5   3  127.29   21.00
  15   5  -3  180.88   26.10
  14  -5  -3  298.57   29.70
  14   5  -3  393.86   27.60
 -14   5   3  345.17   28.50
  13  -5  -3  822.52   38.70
 -13   5   3  936.41   38.10
  13   5  -3  879.41   34.90
  12  -5  -3  511.45   29.60
 -12   5   3  465.85   27.50
  12   5  -3  497.85   26.00
  11  -5  -3   26.20   12.50
  11   5  -3   32.30   11.60
 -11   5   3   26.80   12.40
  10  -5  -3   76.89   13.70
  10   5  -3   71.59   11.80
  10   5  -3   75.99   11.20
 -10   5   3   55.59   12.20
   9  -5  -3  536.95   25.50
  -9   5   3  577.54   25.00
   9   5  -3  561.14   21.00
   9   5  -3  576.64   22.50
   8  -5  -3   58.59   11.70
  -8  -5   3   45.60    9.20
  -8   5   3   42.90   10.20
   8   5  -3   52.19    9.50
   8   5  -3   34.20    8.50
   7  -5  -3 1765.82   47.60
   7   5  -3 1709.33   43.60
  -7   5   3 1764.32   46.80
   6  -5  -3 3569.84   83.89
  -6  -5   3 3598.94   80.39
  -6   5   3 3615.44   82.99
   6   5  -3 3495.95   79.99
   5  -5  -3  368.56   15.90
   5  -5  -3  350.76   17.70
  -5  -5   3  360.86   15.00
  -5   5   3  363.66   17.10
   5   5  -3  349.17   14.90
   5   5  -3  344.27   12.30
   4  -5  -3  657.33   21.40
  -4  -5   3  744.73   21.40
   4  -5  -3  674.63   23.40
   4   5  -3  716.83   21.10
  -4   5   3  711.03   22.30
   4   5  -3  725.83   18.50
  -3  -5   3  484.35   16.90
   3  -5  -3  463.65   18.40
   3  -5  -3  470.95   16.80
  -3  -5   3  480.15   14.10
  -3   5   3  492.75   19.90
  -3   5   3  437.56   16.60
   3   5  -3  444.06   13.70
   3   5  -3  472.75   16.20
  -2  -5   3 1524.15   36.80
   2  -5  -3 1507.55   38.10
   2  -5  -3 1510.35   38.10
  -2  -5   3 1501.55   34.90
   2  -5  -3 1521.95   35.60
  -2   5   3 1482.55   38.30
   2   5  -3 1449.85   34.70
   2   5  -3 1516.85   36.50
  -2   5   3 1434.46   35.40
   1  -5  -3    3.40    4.70
   1  -5  -3    2.00    7.10
  -1  -5   3    4.50    5.70
  -1  -5   3   -3.30    6.10
   1  -5  -3  -16.60    6.70
   1   5  -3   -4.20    5.70
  -1   5   3    2.90    5.70
  -1   5   3   -2.10    7.40
  -1   5   3  -16.50    7.50
   0  -5  -3 4378.56   95.69
   0  -5  -3 4282.47   95.89
   0  -5   3 4285.97   94.59
   0   5  -3 4290.27   94.69
   0   5   3 4379.16   95.59
   0   5   3 4271.37   91.89
   0   5   3 4389.16   95.99
   1  -5   3  651.03   20.00
  -1  -5  -3  613.64   20.60
  -1  -5  -3  633.14   20.40
   1   5   3  626.34   21.70
   1   5   3  656.13   21.10
  -1   5  -3  621.54   20.20
  -1   5  -3  621.14   19.10
  -2  -5  -3   68.19   11.30
   2  -5   3   89.99   12.20
   2   5   3   94.09   12.50
   2   5   3   83.29   12.50
  -2   5  -3   68.59    9.60
  -2   5  -3   66.89    9.20
   3  -5   3  342.37   15.50
  -3  -5  -3  335.97   16.10
  -3   5  -3  350.26   17.10
   3   5   3  365.46   16.70
   3   5   3  327.57   15.40
   3   5   3  340.77   12.60
  -3   5  -3  343.17   14.60
   4  -5   3   73.19    9.80
  -4  -5  -3   61.99    9.60
  -4   5  -3   85.09   11.10
   4   5   3   67.09    9.90
  -4   5  -3   56.99    8.30
   4   5   3   63.79   10.80
   5  -5   3  231.08   15.40
  -5  -5  -3  263.57   16.30
   5   5   3  262.77   14.40
  -5   5  -3  237.28   16.80
  -5   5  -3  234.58   14.70
  -6  -5  -3 1758.92   47.90
   6   5   3 1786.02   44.90
  -6   5  -3 1754.62   46.10
  -6   5  -3 1849.11   49.40
  -7  -5  -3  854.81   30.50
   7   5   3  887.21   28.80
  -7   5  -3  877.21   29.10
  -7   5  -3  883.51   31.60
  -8  -5  -3   32.00   11.70
  -8   5  -3   27.20   11.40
  -8   5  -3   47.40   10.80
  -9  -5  -3  767.32   32.10
  -9   5  -3  818.22   33.70
  -9   5  -3  819.62   30.50
 -10  -5  -3  229.98   22.30
 -10   5  -3  222.08   20.30
 -10   5  -3  239.08   23.00
 -11  -5  -3  287.07   26.00
 -11   5  -3  328.27   23.40
 -11   5  -3  343.27   27.50
 -12  -5  -3  530.05   32.50
  12  -5   3  516.95   33.90
 -12   5  -3  464.55   28.40
 -13  -5  -3  213.48   27.60
  13  -5   3  255.57   29.10
 -13   5  -3  112.29   19.60
  13   5   3  179.38   26.40
 -14  -5  -3  488.95   35.20
  14  -5   3  463.05   36.40
 -14   5  -3  507.55   33.50
  14   5   3  459.75   33.80
  15  -5   3  -15.80   18.70
 -15   5  -3    6.30   17.10
  15   5   3   -7.70   17.30
  16  -5   3   17.70   20.20
 -16   5  -3   19.10   20.40
  16   5   3    6.50   18.90
  17  -5   3   71.19   25.70
  17   5   3  114.29   31.00
 -17   5  -3   89.19   23.80
  19  -6  -3  230.18   37.10
 -19   6   3  152.28   28.80
  18  -6  -3  175.08   28.30
 -18   6   3  192.98   28.70
  17  -6  -3   36.30   21.10
  17   6  -3   53.89   19.80
 -17   6   3   -7.40   19.70
  16  -6  -3  230.08   31.20
  16   6  -3  180.28   26.10
 -16   6   3  107.79   22.00
  15  -6  -3  765.92   41.80
  15   6  -3  795.12   36.10
 -15   6   3  792.22   40.20
  14  -6  -3   16.20   15.40
 -14   6   3    4.60   14.60
  14   6  -3   33.10   15.30
  13  -6  -3  339.27   28.00
  13   6  -3  365.36   24.70
 -13   6   3  296.47   25.80
  12  -6  -3  584.84   31.20
 -12   6   3  527.35   29.20
  12   6  -3  576.04   26.80
  11  -6  -3   74.99   14.80
  11   6  -3   70.89   12.90
 -11   6   3   51.39   13.10
  10  -6  -3  912.91   34.30
  10   6  -3  887.51   28.00
 -10   6   3  864.11   32.50
  10   6  -3  900.11   29.50
   9  -6  -3 2498.05   68.19
  -9  -6   3 2679.33   63.59
   9   6  -3 2551.34   62.99
  -9   6   3 2690.63   67.69
   9   6  -3 2666.63   61.29
   8  -6  -3  120.39   14.00
   8   6  -3  108.99   11.40
   8   6  -3  114.59   13.40
  -8   6   3  109.69   15.60
   7  -6  -3   83.79   12.10
  -7  -6   3   62.79   10.00
  -7   6   3  101.89   13.80
   7   6  -3  105.19   12.40
   7   6  -3   77.79    9.80
   6  -6  -3  866.31   29.40
  -6  -6   3  899.71   25.60
   6   6  -3  921.21   25.80
  -6   6   3  926.21   28.70
   5  -6  -3   74.29   10.40
  -5  -6   3   74.69   10.20
   5  -6  -3   97.69   11.90
   5   6  -3   67.29   10.40
  -5   6   3   66.49    9.50
   4  -6  -3   59.09    9.80
  -4  -6   3   62.99   10.00
   4   6  -3   47.80    7.10
  -4   6   3   47.20   11.20
  -4   6   3   50.69    8.40
   3  -6  -3 1724.43   40.80
  -3  -6   3 1690.23   40.20
   3  -6  -3 1695.33   42.60
  -3  -6   3 1696.13   37.80
   3   6  -3 1620.84   39.80
  -3   6   3 1623.34   40.50
   3   6  -3 1673.43   37.60
  -3   6   3 1657.63   42.90
   2  -6  -3  209.98   11.40
   2  -6  -3  219.88   13.90
  -2  -6   3  229.18   12.60
  -2  -6   3  216.98   10.00
   2  -6  -3  203.18   13.70
  -2   6   3  210.48   15.80
  -2   6   3  198.98   11.30
   2   6  -3  222.48   10.40
   1  -6  -3  224.88   13.40
   1  -6  -3  206.68    9.90
   1  -6  -3  185.48   12.90
  -1  -6   3  195.78   12.50
  -1  -6   3  202.28   10.80
  -1   6   3  184.08   15.20
   1   6  -3  187.38   10.90
  -1   6   3  192.48   10.20
  -1   6   3  220.78   15.10
   0  -6  -3 3178.98   72.19
   0  -6   3 3148.28   70.69
   0  -6  -3 3199.68   71.59
   0   6   3 3179.98   72.39
   0   6  -3 3057.39   70.59
   0   6   3 3118.49   68.29
   0   6   3 3200.18   71.69
   1  -6   3   81.29    9.50
  -1  -6  -3   99.19   11.20
  -1  -6  -3   95.99   11.60
  -1   6  -3   76.39   11.00
  -1   6  -3   82.49   10.40
   1   6   3   88.79    8.00
   1   6   3   79.09   11.50
   1   6   3  102.29   11.60
   2  -6   3   25.50    6.90
   2  -6   3   63.49    9.30
  -2  -6  -3   44.50    8.50
  -2   6  -3   38.00    7.10
  -2   6  -3   50.19    8.90
   2   6   3   43.50    9.20
   2   6   3   50.29    8.50
   3  -6   3 1536.35   38.80
  -3  -6  -3 1510.65   39.50
   3   6   3 1542.25   39.60
   3   6   3 1513.05   35.70
  -3   6  -3 1488.25   40.20
  -3   6  -3 1468.45   38.10
   3   6   3 1534.35   38.50
  -4  -6  -3  445.76   19.10
   4  -6   3  459.25   19.40
   4   6   3  475.45   19.60
  -4   6  -3  453.15   19.80
   4   6   3  433.76   16.40
   4   6   3  454.25   18.60
  -4   6  -3  444.86   17.70
   5  -6   3   64.59   10.30
  -5  -6  -3   79.49   13.10
  -5   6  -3   78.29   11.40
  -5   6  -3   51.19    8.60
   5   6   3   57.89    9.10
  -6  -6  -3 1271.47   36.50
  -6   6  -3 1230.38   37.80
   6   6   3 1195.68   33.80
  -6   6  -3 1203.68   34.90
  -7  -6  -3   55.79   12.00
  -7   6  -3   49.99   11.70
  -7   6  -3   43.10   10.30
   7   6   3   49.00   11.60
  -8  -6  -3  -22.70    9.80
  -8   6  -3   -5.10    9.10
  -8   6  -3   24.30   11.30
  -9  -6  -3 1253.07   41.80
  -9   6  -3 1251.87   43.20
  -9   6  -3 1263.67   39.50
 -10  -6  -3  389.26   25.20
 -10   6  -3  311.47   22.20
 -10   6  -3  303.47   24.90
 -11  -6  -3  256.57   25.30
  11  -6   3  231.18   26.30
 -11   6  -3  284.67   25.90
 -11   6  -3  287.27   22.80
  12  -6   3  175.98   26.70
 -12  -6  -3  240.18   26.20
 -12   6  -3  196.78   22.50
 -13  -6  -3   24.00   17.20
  13  -6   3   40.00   18.50
  13   6   3   17.10   16.70
 -13   6  -3   12.50   14.90
  14  -6   3   61.49   20.20
 -14  -6  -3   52.49   19.50
  14   6   3   83.29   19.60
 -14   6  -3   58.39   18.20
 -15  -6  -3  323.87   34.10
  15  -6   3  346.17   35.90
 -15   6  -3  304.27   31.30
  15   6   3  323.77   33.70
  16  -6   3  218.38   29.70
  16   6   3  181.68   29.80
 -16   6  -3  205.98   33.80
  17  -6   3  201.38   30.00
 -17   6  -3  150.68   27.60
  19  -7  -3  602.24   46.10
 -19   7   3  463.25   43.80
  18  -7  -3  414.76   39.80
 -18   7   3  384.56   39.40
  17  -7  -3  -15.60   18.40
 -17   7   3   -5.90   20.00
  17   7  -3   34.20   17.80
  16  -7  -3 1021.00   49.50
  16   7  -3 1040.20   43.90
 -16   7   3 1017.00   47.40
  15  -7  -3   43.20   18.00
 -15   7   3   23.40   16.80
  15   7  -3   28.60   16.00
  14  -7  -3  -37.90   14.40
  14   7  -3   21.90   13.90
 -14   7   3    0.20   14.50
  13  -7  -3   47.20   16.80
 -13   7   3   83.99   16.70
  13   7  -3   56.79   14.60
  12  -7  -3 1084.99   42.80
 -12   7   3 1202.58   42.50
  12   7  -3 1149.19   37.60
  11  -7  -3  519.35   28.10
  11   7  -3  524.65   21.70
  11   7  -3  517.95   24.00
 -11   7   3  497.55   26.30
  10  -7  -3 1406.76   45.20
 -10   7   3 1378.46   43.50
  10   7  -3 1378.56   37.10
  10   7  -3 1371.66   39.20
   9  -7  -3   19.70   10.70
  -9  -7   3    7.90    8.40
   9   7  -3   -1.70    8.60
  -9   7   3   15.20    9.90
   9   7  -3   13.00    9.10
   8  -7  -3  135.99   16.60
   8   7  -3  145.89   11.40
   8   7  -3  194.08   14.40
  -8   7   3  159.28   16.20
   7  -7  -3  466.05   22.30
  -7  -7   3  502.95   17.70
  -7   7   3  481.45   21.20
   7   7  -3  492.95   18.40
   6  -7  -3 1883.61   49.10
  -6  -7   3 1824.72   43.80
  -6   7   3 1795.32   47.40
   6   7  -3 1793.92   43.60
   5  -7  -3 5400.36  111.19
  -5  -7   3 4822.42  106.49
   5  -7  -3 4729.83  110.69
  -5   7   3 4804.42  109.49
   5   7  -3 4746.33  106.29
  -4  -7   3  158.78   11.00
   4  -7  -3  153.48   13.90
  -4   7   3  150.98   12.60
   4   7  -3  156.38   10.80
  -4   7   3  148.49   15.50
  -3  -7   3  171.78   11.60
   3  -7  -3  149.88   13.50
  -3  -7   3  167.08    8.20
   3  -7  -3  175.98   11.60
  -3   7   3  151.48   12.10
   3   7  -3  163.98   10.90
   3   7  -3  174.58    8.40
  -3   7   3  159.18   15.20
  -2  -7   3   46.20    5.70
  -2  -7   3   35.00    7.20
   2  -7  -3   46.20    8.50
   2  -7  -3   31.20    6.50
   2  -7  -3   30.10    7.80
  -2   7   3   33.80    6.90
   2   7  -3   36.40    6.00
  -2   7   3   39.70    9.20
   1  -7  -3   39.60    8.30
   1  -7  -3   32.30    6.00
   1  -7  -3   42.30    8.20
  -1  -7   3   46.70    6.30
  -1   7   3   39.00    8.90
  -1   7   3   54.59    9.10
   1   7  -3   26.60    6.50
   0  -7  -3  314.57   15.20
   0  -7  -3  275.67   14.40
   0  -7   3  310.17   13.40
   0   7   3  273.37   15.00
   0   7   3  282.27   11.90
   0   7   3  330.37   16.10
   0   7  -3  297.17   13.80
  -1  -7  -3 3741.93   84.89
  -1  -7  -3 3778.82   84.09
  -1   7  -3 3680.23   83.99
   1   7   3 3729.73   81.39
   1   7   3 3835.62   85.19
   1   7   3 3776.62   83.99
  -1   7  -3 3745.33   84.29
   2  -7   3  791.52   23.90
  -2  -7  -3  785.12   24.50
   2  -7   3  796.22   24.70
  -2   7  -3  758.62   23.50
   2   7   3  804.22   23.50
   2   7   3  756.82   24.40
  -2   7  -3  780.42   24.80
  -3  -7  -3 1463.45   39.00
   3  -7   3 1492.55   38.80
  -3   7  -3 1430.16   37.90
   3   7   3 1498.95   37.90
  -3   7  -3 1464.65   39.80
   3   7   3 1534.95   39.20
  -4  -7  -3  114.19   13.20
   4  -7   3  117.99   14.10
   4   7   3   99.89   11.00
  -4   7  -3  102.59   12.10
  -4   7  -3  110.59   13.90
   4   7   3  100.09   13.00
   4   7   3   83.59   11.90
  -5  -7  -3   19.90    9.00
   5   7   3   13.30    8.80
  -5   7  -3   16.70    8.80
  -5   7  -3   13.40    7.90
  -6  -7  -3  570.84   23.80
  -6   7  -3  614.94   25.60
  -6   7  -3  647.84   23.70
   6   7   3  613.04   22.50
  -7  -7  -3 3993.80   95.19
   7   7   3 4273.07   97.19
  -7   7  -3 4001.20   94.19
  -7   7  -3 3815.72   96.59
  -8  -7  -3   85.99   13.70
  -8   7  -3   76.59   13.70
  -8   7  -3   82.39   12.40
  -9  -7  -3   14.90   12.50
  -9   7  -3   22.20   11.10
  -9   7  -3    6.20   12.00
 -10  -7  -3   52.39   14.70
 -10   7  -3   46.10   15.40
 -10   7  -3   44.60   12.70
  11  -7   3   30.50   15.90
 -11  -7  -3   21.90   15.20
 -11   7  -3    3.60   12.90
  12  -7   3  211.28   27.50
 -12  -7  -3  207.18   25.80
 -12   7  -3  218.68   23.20
  12   7   3  234.88   24.80
 -13  -7  -3 1640.74   56.59
  13  -7   3 1550.24   59.29
 -13   7  -3 1683.03   54.49
  13   7   3 1544.65   54.49
 -14  -7  -3   86.29   20.70
  14  -7   3  106.39   23.20
  14   7   3  131.99   21.50
 -14   7  -3  110.99   20.20
 -15  -7  -3   30.80   20.50
  15  -7   3   33.10   21.20
  15   7   3    9.00   19.80
 -15   7  -3  -25.40   17.10
  16  -7   3  138.19   27.30
 -16   7  -3  162.48   24.90
  17  -7   3   57.29   23.30
 -17   7  -3   38.60   23.00
  19  -8  -3  -12.00   21.90
 -19   8   3   14.70   23.70
  18  -8  -3   81.79   23.80
 -18   8   3   23.60   21.60
  17  -8  -3   88.39   23.20
 -17   8   3   57.49   22.60
  16  -8  -3  238.98   32.00
 -16   8   3  273.27   31.30
  16   8  -3  239.38   27.70
  15  -8  -3 1002.30   47.90
  15   8  -3 1053.99   41.60
 -15   8   3 1163.08   46.60
  14  -8  -3   99.79   20.00
 -14   8   3   49.99   16.50
  14   8  -3   86.29   16.60
  13  -8  -3   41.10   16.30
  13   8  -3   52.69   14.60
 -13   8   3   49.30   15.50
  12  -8  -3  861.41   38.60
  12   8  -3  916.71   32.80
 -12   8   3  893.51   36.40
  11  -8  -3   32.40   13.50
  11   8  -3   34.60   10.30
  11   8  -3   33.80   11.40
 -11   8   3   43.60   12.90
  10  -8  -3  317.67   23.00
  10   8  -3  311.87   16.30
 -10   8   3  289.77   21.40
  10   8  -3  349.47   19.20
   9  -8  -3  901.71   33.70
   9   8  -3  861.31   27.80
  -9   8   3  904.61   32.30
   9   8  -3  912.51   26.10
   8  -8  -3   25.60   10.50
  -8  -8   3   33.10    7.20
  -8   8   3   12.40    9.40
   8   8  -3   26.60    9.00
   8   8  -3   22.10    6.90
  -7  -8   3 1053.59   28.50
   7  -8  -3 1056.29   34.60
   7   8  -3 1022.70   28.70
  -7   8   3 1085.49   33.40
  -6  -8   3 1445.36   35.60
   6  -8  -3 1389.46   41.00
  -6   8   3 1437.06   39.70
   6   8  -3 1442.86   35.60
  -5  -8   3  153.18   10.70
   5  -8  -3  164.28   14.90
   5   8  -3  132.29   10.60
  -5   8   3  158.58   13.80
   4  -8  -3  245.38   15.80
  -4  -8   3  267.47   12.50
   4  -8  -3  259.97   14.20
  -4   8   3  255.87   17.40
   4   8  -3  264.97   12.30
  -4   8   3  249.38   14.80
   3  -8  -3 6051.59  133.59
  -3  -8   3 6161.88  130.49
  -3   8   3 6116.09  133.69
  -3   8   3 5904.61  131.69
   2  -8  -3  456.95   16.40
   2  -8  -3  445.46   18.20
  -2  -8   3  442.76   14.00
  -2  -8   3  465.35   16.40
   2  -8  -3  448.56   18.10
  -2   8   3  443.66   16.10
   2   8  -3  444.66   14.40
  -2   8   3  455.45   20.00
  -1  -8   3 1439.56   34.50
   1  -8  -3 1411.16   37.40
   1  -8  -3 1409.96   36.70
   1  -8  -3 1413.06   34.50
  -1   8   3 1471.05   37.60
   1   8  -3 1371.96   34.30
  -1   8   3 1386.76   34.60
   0  -8  -3 3753.92   85.29
   0  -8   3 3885.71   84.49
   0  -8  -3 3752.82   86.19
   0   8  -3 3823.42   86.09
   0   8   3 3791.72   83.09
   0   8  -3 3627.64   84.19
   0   8   3 3833.62   85.39
   0   8   3 3960.50   86.69
  -1  -8  -3  318.27   15.00
  -1  -8  -3  324.47   15.80
   1   8   3  318.27   16.10
   1   8   3  333.67   15.50
  -1   8  -3  310.67   15.40
  -1   8  -3  310.77   15.50
   1   8   3  323.47   12.90
  -2  -8  -3  218.78   13.10
   2  -8   3  217.78   14.90
   2  -8   3  226.28   13.50
  -2  -8  -3  191.18   13.70
   2   8   3  207.58   14.40
  -2   8  -3  241.68   13.90
  -2   8  -3  200.88   14.10
   2   8   3  224.28   13.80
  -3  -8  -3 1598.84   42.10
   3  -8   3 1654.63   42.60
   3   8   3 1635.24   42.50
   3   8   3 1634.74   40.80
  -3   8  -3 1603.64   41.70
  -3   8  -3 1652.33   43.30
   4  -8   3  145.59   16.70
  -4  -8  -3  129.39   13.50
  -4   8  -3  129.09   14.40
   4   8   3  131.39   11.90
  -4   8  -3  134.99   12.60
   4   8   3  134.89   15.70
   4   8   3  123.99   12.80
  -5  -8  -3  838.52   27.90
  -5   8  -3  837.22   29.30
   5   8   3  826.72   25.40
   5   8   3  850.81   26.30
  -5   8  -3  846.12   27.20
  -6  -8  -3 1806.22   47.70
  -6   8  -3 1738.03   49.40
   6   8   3 1795.22   45.30
  -6   8  -3 1740.43   46.90
  -7   8  -3   81.89   13.30
  -7   8  -3   95.89   14.90
  -8  -8  -3   21.40   11.90
  -8   8  -3   24.10   11.80
  -8   8  -3   21.00   10.80
  -9  -8  -3  567.24   28.30
  -9   8  -3  666.93   27.80
  -9   8  -3  608.94   30.50
 -10  -8  -3  105.39   16.70
 -10   8  -3   84.89   14.80
 -11  -8  -3  320.37   26.20
  11  -8   3  295.37   28.60
 -11   8  -3  275.17   23.70
  12  -8   3  552.74   36.40
 -12  -8  -3  628.44   33.70
  12   8   3  685.53   33.10
 -12   8  -3  596.24   32.20
  13  -8   3  177.48   27.80
 -13  -8  -3  171.08   25.90
  13   8   3  193.98   27.90
 -13   8  -3  145.49   24.20
 -14  -8  -3   91.39   20.60
  14  -8   3  112.59   23.10
  14   8   3   79.09   20.60
 -14   8  -3   97.99   20.30
  15  -8   3  519.15   40.50
 -15  -8  -3  646.44   39.70
 -15   8  -3  608.64   38.10
  15   8   3  517.15   38.60
  16  -8   3    6.90   19.90
 -16   8  -3    5.70   20.70
  17  -8   3  460.95   42.90
 -17   8  -3  467.95   40.60
  19  -9  -3   28.50   23.90
 -19   9   3   17.60   22.90
  18  -9  -3    5.30   19.90
 -18   9   3    7.30   20.30
  17  -9  -3   69.39   22.20
 -17   9   3   28.70   20.40
  16  -9  -3  163.08   25.20
  16   9  -3  200.78   28.40
 -16   9   3  141.79   23.10
  15  -9  -3  105.99   21.60
 -15   9   3  111.09   20.00
  15   9  -3  116.29   18.40
  14  -9  -3  319.57   31.30
 -14   9   3  300.67   28.20
  14   9  -3  283.87   25.70
  13  -9  -3   24.00   15.70
 -13   9   3   18.10   14.60
  13   9  -3   17.20   13.40
  12  -9  -3   86.69   17.00
 -12   9   3   83.39   15.70
  12   9  -3   75.39   13.70
  11  -9  -3  141.59   21.10
 -11   9   3  139.49   18.90
  11   9  -3  158.68   17.40
  11   9  -3  134.79   14.10
  10  -9  -3  811.02   33.40
  10   9  -3  843.72   27.50
  10   9  -3  804.22   24.40
 -10   9   3  789.42   31.90
   9  -9  -3  369.56   23.00
   9   9  -3  374.56   17.50
   9   9  -3  333.17   14.90
  -9   9   3  364.46   21.20
   8  -9  -3  602.04   26.50
  -8  -9   3  617.14   20.00
  -8   9   3  611.54   25.50
   8   9  -3  612.44   21.10
  -7  -9   3   89.29   10.00
   7  -9  -3   92.49   13.00
   7   9  -3   98.79   11.70
  -7   9   3   78.99   11.30
   6  -9  -3   40.20   10.60
  -6  -9   3   35.10    7.00
   6   9  -3   54.99    7.70
  -6   9   3   38.60    9.70
   5  -9  -3  924.91   30.00
  -5  -9   3  916.51   24.50
  -5   9   3  898.41   28.30
   5   9  -3  914.31   24.40
   4  -9  -3  171.48   14.70
   4  -9  -3  180.88   13.30
  -4  -9   3  180.38   10.80
   4   9  -3  165.78   10.80
  -4   9   3  193.78   13.60
  -3  -9   3  129.39   10.70
   3  -9  -3  136.19   13.60
  -3   9   3  131.79   12.30
  -3   9   3  157.18   15.60
  -2  -9   3   11.20    5.00
  -2  -9   3    1.30    6.30
   2  -9  -3    8.90    6.00
   2  -9  -3    7.20    7.70
  -2   9   3    9.70    8.70
  -2   9   3    1.10    6.50
   2   9  -3    4.80    5.60
  -1  -9   3   97.29    9.50
   1  -9  -3   94.59   12.40
   1  -9  -3  114.49   10.30
   1  -9  -3   86.39   12.30
  -1   9   3   96.19   10.40
   1   9  -3   80.89    9.70
  -1   9   3   83.29   13.60
   0  -9  -3  664.83   21.50
   0  -9  -3  671.43   22.70
   0  -9   3  654.83   20.20
   0   9  -3  637.64   22.40
   0   9   3  660.83   21.90
   0   9  -3  673.33   20.80
   0   9   3  633.84   19.70
  -1  -9  -3  804.72   25.50
  -1  -9  -3  810.42   24.20
   1   9   3  794.62   22.70
  -1   9  -3  806.72   25.30
   1   9   3  845.82   24.50
   1   9   3  813.12   25.60
  -1   9  -3  791.02   24.50
   2  -9   3  448.76   18.10
   2  -9   3  470.45   20.10
  -2  -9  -3  451.45   17.40
  -2  -9  -3  440.26   18.50
  -2   9  -3  419.76   18.50
   2   9   3  426.96   17.50
   2   9   3  443.86   19.00
  -2   9  -3  443.16   18.30
  -3  -9  -3  225.88   14.70
   3  -9   3  232.78   16.60
  -3   9  -3  246.48   16.00
   3   9   3  221.88   14.00
   3   9   3  249.48   15.70
  -3   9  -3  230.38   14.50
  -4  -9  -3   -4.10    8.00
  -4   9  -3    1.30    7.80
   4   9   3    3.00    7.50
  -4   9  -3   -9.10    7.90
  -5  -9  -3  204.08   16.00
  -5   9  -3  216.98   15.50
   5   9   3  219.08   14.50
   5   9   3  198.38   15.30
  -5   9  -3  250.17   17.30
  -6  -9  -3   69.99   11.30
   6   9   3   64.99   11.00
  -6   9  -3   73.19   12.50
  -6   9  -3   70.39   11.00
   6   9   3   81.89   10.50
  -7  -9  -3 1890.51   51.89
  -7   9  -3 1940.31   51.79
  -7   9  -3 1902.11   53.89
  -8  -9  -3  931.61   33.60
  -8   9  -3  908.41   35.10
  -8   9  -3  919.21   32.80
  -9  -9  -3   53.09   13.90
  -9   9  -3   57.99   13.10
 -10  -9  -3   86.19   16.30
 -10   9  -3   84.69   14.40
  11  -9   3   26.50   16.80
 -11  -9  -3   15.50   15.60
 -11   9  -3    4.60   12.90
 -12  -9  -3  250.57   25.80
  12  -9   3  212.68   28.80
  12   9   3  277.07   26.50
 -12   9  -3  254.47   24.70
 -13  -9  -3  840.12   40.50
  13  -9   3  858.31   44.00
  13   9   3  834.62   40.90
 -13   9  -3  837.32   39.10
  14  -9   3  115.09   23.70
 -14  -9  -3   95.89   21.10
  14   9   3   90.49   21.00
 -14   9  -3   99.59   20.70
  15  -9   3  123.59   26.30
 -15  -9  -3  137.89   24.30
 -15   9  -3   88.89   22.70
  16  -9   3   26.00   22.00
 -16   9  -3   -2.90   19.20
  17  -9   3    9.80   22.20
 -17   9  -3   20.60   21.50
  19 -10  -3  223.68   31.80
 -19  10   3  228.28   32.10
  18 -10  -3  136.39   27.40
 -18  10   3  173.18   27.20
  17 -10  -3   36.20   20.40
 -17  10   3   31.00   20.90
  16 -10  -3    7.50   18.10
 -16  10   3  -29.90   17.00
  15 -10  -3   82.39   20.60
 -15  10   3   24.50   17.10
  15  10  -3   26.30   15.30
  14 -10  -3  314.47   30.80
 -14  10   3  238.28   26.60
  14  10  -3  326.97   24.30
  13 -10  -3  308.67   28.40
  13  10  -3  261.37   23.00
 -13  10   3  277.47   25.80
  12 -10  -3   46.40   15.50
 -12  10   3   23.00   13.70
  12  10  -3   29.00   12.80
  11 -10  -3   60.19   14.90
  11  10  -3   49.20   11.70
 -11  10   3   34.00   12.70
  11  10  -3   36.80    8.90
  10 -10  -3   17.30   12.30
  10  10  -3   22.50    9.90
 -10  10   3    8.30   10.70
   9 -10  -3  105.69   17.70
   9  10  -3  125.99   13.60
  -9  10   3  140.89   17.10
   8 -10  -3   18.80   10.00
   8  10  -3    9.60    7.70
  -8  10   3   16.90    9.80
   7 -10  -3  766.32   29.90
  -7  10   3  830.02   28.80
   7  10  -3  840.82   23.50
   6 -10  -3  100.09   15.10
  -6  10   3  100.19   14.00
   5 -10  -3  132.59   14.90
  -5  10   3  103.99   13.20
   4 -10  -3    9.90    8.70
  -4  10   3    1.50    7.70
   3 -10  -3  272.67   16.20
   3 -10  -3  266.97   14.30
  -3 -10   3  248.48   12.60
  -3  10   3  255.47   17.60
  -3  10   3  252.57   14.40
  -2 -10   3  670.73   20.70
  -2 -10   3  666.03   18.50
   2 -10  -3  682.03   23.10
  -2  10   3  687.83   21.60
   2  10  -3  639.94   18.80
  -2  10   3  683.93   23.70
  -1 -10   3 1692.43   39.30
   1 -10  -3 1620.34   41.70
   1 -10  -3 1636.64   40.10
   1 -10  -3 1616.34   42.60
   1  10  -3 1623.04   39.20
  -1  10   3 1605.14   40.20
  -1  10   3 1639.84   41.80
   0 -10  -3  310.17   16.70
   0 -10  -3  356.36   16.10
   0 -10   3  353.46   14.40
   0  10  -3  342.07   17.20
   0  10  -3  362.16   15.30
   0  10   3  330.87   14.70
   0  10   3  341.17   16.50
  -1 -10  -3    5.10    7.20
   1 -10   3    0.00    6.00
  -1 -10  -3    9.90    8.10
   1  10   3    5.90    8.40
  -1  10  -3   -1.90    7.10
   1  10   3    5.30    7.90
   1  10   3    6.20    6.50
  -1  10  -3    0.60    7.30
  -2 -10  -3  952.40   28.30
  -2 -10  -3  919.11   26.60
  -2  10  -3  932.01   28.30
   2  10   3  914.21   26.90
  -2  10  -3  915.51   28.20
   2  10   3  912.51   28.30
  -3 -10  -3   34.90    8.90
  -3  10  -3   39.90    8.70
   3  10   3   26.60    9.20
   3  10   3   33.90    8.30
  -3  10  -3   14.90    8.80
  -4 -10  -3 1006.50   30.40
  -4  10  -3  966.00   30.30
   4  10   3  982.90   28.50
  -4  10  -3  995.90   31.70
  -5 -10  -3 1324.17   37.80
  -5  10  -3 1344.47   38.20
   5  10   3 1343.17   36.20
  -5  10  -3 1296.17   39.80
   5  10   3 1328.37   35.70
  -6 -10  -3  367.46   19.90
  -6  10  -3  345.17   19.10
   6  10   3  392.96   19.10
   6  10   3  345.17   19.40
  -6  10  -3  346.07   21.20
  -7 -10  -3   15.50   10.70
   7  10   3   14.00   11.00
  -7  10  -3   27.90   11.20
  -7  10  -3   21.80   10.10
  -8 -10  -3   61.39   13.30
  -8  10  -3   96.29   13.50
  -9 -10  -3  116.19   16.40
  -9  10  -3  118.19   18.50
 -10 -10  -3  516.25   27.80
  10 -10   3  445.96   29.90
 -10  10  -3  376.16   24.40
 -11 -10  -3   86.89   17.20
  11 -10   3  119.89   21.00
 -11  10  -3  150.98   21.50
  12 -10   3   25.00   17.10
 -12 -10  -3   -4.10   15.50
 -12  10  -3   -7.60   13.10
  12  10   3    2.90   16.00
  13 -10   3  215.68   30.60
 -13 -10  -3  209.48   27.00
 -13  10  -3  299.97   27.50
  13  10   3  219.98   28.60
  14 -10   3   43.80   20.30
 -14 -10  -3   45.90   19.30
 -14  10  -3  -13.70   16.20
  14  10   3   17.60   18.90
 -15 -10  -3   -7.50   18.10
  15 -10   3   14.70   20.10
 -15  10  -3   -0.30   17.40
  16 -10   3  138.99   26.80
 -16  10  -3  213.88   31.30
  17 -10   3    7.10   21.60
 -17  10  -3    7.10   20.60
  19 -11  -3   88.59   26.10
 -19  11   3   72.89   25.10
  18 -11  -3  251.57   36.10
 -18  11   3  211.48   32.90
  17 -11  -3   -2.40   18.90
 -17  11   3  -18.90   17.20
  16 -11  -3  347.37   35.10
 -16  11   3  318.97   33.40
  15 -11  -3   44.30   18.80
 -15  11   3   39.70   17.60
  14 -11  -3  182.68   24.20
  14  11  -3  166.08   22.60
 -14  11   3  151.88   24.80
  13 -11  -3   -2.30   15.10
 -13  11   3    4.30   13.80
  13  11  -3   15.40   13.10
  12 -11  -3  840.52   39.80
  12  11  -3  910.31   31.30
 -12  11   3  848.32   36.60
  11 -11  -3   95.09   16.30
 -11  11   3   88.89   15.00
  11  11  -3  128.29   16.60
  10 -11  -3  277.57   22.80
  10  11  -3  284.77   17.10
 -10  11   3  294.37   21.60
   9 -11  -3   68.79   13.30
  -9  11   3   68.39   12.60
   8 -11  -3   -0.80    9.50
  -8  11   3   14.40    9.60
   7 -11  -3  345.47   21.50
  -7  11   3  391.26   20.60
   6 -11  -3  269.57   18.80
  -6  11   3  268.97   17.30
   5 -11  -3  330.07   19.60
  -5  11   3  360.46   18.10
   4 -11  -3 1334.47   38.70
  -4  11   3 1375.26   37.50
   3 -11  -3   18.90    7.80
  -3 -11   3   19.30    6.70
   3 -11  -3   30.40    8.70
  -3  11   3   35.60   12.80
  -3  11   3   24.90    7.90
   2 -11  -3 1955.20   49.40
  -2 -11   3 1994.90   45.10
  -2 -11   3 1994.40   47.10
  -2  11   3 1964.60   49.80
  -2  11   3 1968.00   48.30
   2  11  -3 1934.71   45.10
  -1 -11   3  115.99    9.70
   1 -11  -3   82.89   12.30
   1 -11  -3  111.59   12.90
  -1  11   3  112.39   14.00
   1  11  -3  106.49   11.00
  -1  11   3   98.49   11.40
   0 -11  -3   55.89    9.20
   0 -11  -3   38.80    8.80
   0 -11   3   36.30    6.80
   0  11  -3   62.39    9.70
   0  11  -3   44.40    8.30
   0  11   3   58.49    8.40
   0  11   3   60.69    9.50
   1 -11   3 1434.46   38.40
  -1 -11  -3 1514.05   38.10
  -1 -11  -3 1513.95   39.80
   1  11   3 1447.66   37.40
  -1  11  -3 1443.66   38.60
   1  11   3 1551.24   38.30
   1  11   3 1528.85   39.90
  -1  11  -3 1413.86   40.00
  -2 -11  -3 1189.38   31.90
  -2 -11  -3 1183.08   33.70
  -2  11  -3 1177.28   33.70
   2  11   3 1204.08   34.00
  -2  11  -3 1169.88   34.10
   2  11   3 1185.38   32.00
  -3 -11  -3 1019.20   30.60
   3  11   3 1001.30   28.60
  -3  11  -3 1008.20   31.00
   3  11   3 1028.20   33.70
  -3  11  -3 1003.60   31.60
  -4 -11  -3  295.67   17.20
   4  11   3  246.58   15.20
  -4  11  -3  278.57   17.40
  -4  11  -3  286.17   16.90
  -5 -11  -3   31.00   10.10
  -5  11  -3   26.10   10.00
   5  11   3   26.30    8.40
  -5  11  -3   41.80    9.80
   5  11   3   11.90    9.30
  -6 -11  -3  249.48   18.00
  -6  11  -3  250.77   19.50
   6  11   3  216.98   17.00
  -6  11  -3  238.78   17.80
  -7 -11  -3  810.42   29.70
   7  11   3  797.12   26.70
  -7  11  -3  781.72   29.90
  -8 -11  -3  171.48   18.90
  -8  11  -3  149.09   18.50
  -9 -11  -3   52.89   14.50
  -9  11  -3  115.89   18.30
 -10 -11  -3   81.99   16.00
  10 -11   3   82.79   18.20
 -10  11  -3   90.99   15.80
  11 -11   3  180.78   23.50
 -11 -11  -3  169.58   22.90
 -11  11  -3  173.88   21.90
 -12 -11  -3  118.29   19.30
  12 -11   3   87.59   20.80
  12  11   3  125.39   19.90
 -12  11  -3  123.89   18.80
 -13 -11  -3  295.87   28.20
  13 -11   3  284.37   31.50
 -13  11  -3  248.08   27.40
  13  11   3  307.57   30.10
 -14 -11  -3  156.58   22.80
  14 -11   3  169.78   26.80
 -14  11  -3  196.68   28.30
 -15 -11  -3  104.09   22.20
  15 -11   3   78.99   23.70
 -15  11  -3  130.39   22.70
  16 -11   3   10.90   22.30
 -16  11  -3   22.30   19.30
  17 -11   3   91.49   26.20
 -17  11  -3  127.29   25.40
  19 -12  -3   51.89   23.20
 -19  12   3   38.20   22.60
  18 -12  -3  152.38   29.00
 -18  12   3  147.79   26.80
  17 -12  -3   59.69   22.80
 -17  12   3   65.79   21.70
  16 -12  -3  130.49   25.70
 -16  12   3  142.39   23.80
  15 -12  -3 1027.70   48.60
 -15  12   3 1046.50   46.30
  14 -12  -3  105.59   22.10
 -14  12   3   92.99   19.20
  13 -12  -3   10.00   15.80
  13  12  -3    6.50   13.00
 -13  12   3  -19.00   13.20
  12 -12  -3  433.86   30.60
  12  12  -3  486.85   23.40
 -12  12   3  447.06   28.00
  11 -12  -3  333.97   26.40
 -11  12   3  402.66   25.80
  10 -12  -3  225.78   22.50
 -10  12   3  169.48   19.50
   9 -12  -3 2330.87   65.99
  -9  12   3 2427.96   64.39
   8 -12  -3   45.80   11.80
  -8  12   3   43.90   11.30
   7 -12  -3  152.08   17.20
  -7  12   3  144.39   15.90
   6 -12  -3 1306.67   41.10
  -6  12   3 1408.16   39.80
   5 -12  -3   47.30   10.40
  -5  12   3   46.40    9.60
   4 -12  -3  456.75   21.30
  -4  12   3  485.85   20.10
   3 -12  -3 2700.03   65.39
  -3 -12   3 2687.63   61.09
  -3  12   3 2671.23   64.29
   2 -12  -3  241.78   15.60
  -2 -12   3  237.18   11.30
   2 -12  -3  250.17   14.60
  -2  12   3  281.17   18.00
  -2  12   3  272.07   15.00
   1 -12  -3  768.82   25.20
   1 -12  -3  751.12   25.80
  -1 -12   3  802.92   22.90
  -1  12   3  792.52   24.80
  -1  12   3  832.72   26.60
   0 -12  -3 1549.64   40.00
   0 -12  -3 1529.55   41.30
   0  12  -3 1527.15   42.20
   0  12  -3 1498.45   39.10
   0  12   3 1559.04   39.70
   0  12   3 1593.14   40.20
  -1 -12  -3  142.19   13.70
  -1 -12  -3  147.79   12.60
   1 -12   3  142.69   12.30
   1  12   3  155.68   13.90
  -1  12  -3  145.19   13.50
   1  12   3  156.48   13.10
  -1  12  -3  150.78   14.40
  -2 -12  -3  516.75   21.30
  -2 -12  -3  542.85   19.50
  -2  12  -3  566.54   21.70
   2  12   3  553.94   24.90
  -2  12  -3  540.45   22.00
   2  12   3  564.74   20.40
  -3 -12  -3 2692.03   63.29
  -3  12  -3 2478.65   63.59
  -3  12  -3 2536.25   63.89
   3  12   3 2615.74   60.29
  -4 -12  -3  417.06   19.80
  -4  12  -3  392.26   20.60
   4  12   3  385.46   17.30
  -4  12  -3  395.96   19.90
  -5 -12  -3  303.77   18.20
   5  12   3  295.67   16.70
  -5  12  -3  276.47   17.90
  -6 -12  -3  662.93   25.70
   6  12   3  642.34   22.70
  -6  12  -3  619.44   25.70
  -7 -12  -3   18.70   11.20
   7  12   3   14.10    9.00
  -7  12  -3   13.50   10.30
  -8 -12  -3   80.19   14.40
  -8  12  -3   53.89   12.90
  -9 -12  -3  684.23   30.30
   9 -12   3  681.53   34.20
  -9  12  -3  674.73   30.60
  10 -12   3  167.88   25.20
 -10 -12  -3  222.98   22.40
 -10  12  -3  189.38   20.90
 -11 -12  -3  184.98   22.70
  11 -12   3  206.68   26.40
 -11  12  -3  197.38   22.50
 -12 -12  -3  184.08   24.10
  12 -12   3  184.78   28.20
  12  12   3  144.19   20.00
 -12  12  -3  160.88   23.90
 -13 -12  -3    1.30   16.40
  13 -12   3   16.30   18.70
 -13  12  -3    4.00   14.90
  14 -12   3   86.49   23.00
 -14 -12  -3   73.79   19.80
 -14  12  -3   76.69   19.60
  15 -12   3  184.78   29.10
 -15 -12  -3  280.07   40.20
 -15  12  -3  168.28   24.40
  16 -12   3   75.79   25.30
 -16  12  -3  100.09   24.60
  18 -13  -3   80.79   25.80
 -18  13   3   45.10   21.80
  17 -13  -3  206.48   29.90
 -17  13   3  220.38   32.60
  16 -13  -3  820.42   48.70
 -16  13   3  924.91   46.30
  15 -13  -3   21.70   19.00
 -15  13   3   21.30   17.10
  14 -13  -3  172.18   27.80
 -14  13   3  177.38   26.30
  13 -13  -3  180.98   26.30
 -13  13   3  177.18   24.60
  12 -13  -3  156.58   23.90
 -12  13   3  138.19   21.60
  11 -13  -3  262.47   24.80
 -11  13   3  252.67   22.80
  10 -13  -3 1560.94   51.39
 -10  13   3 1593.64   49.40
   9 -13  -3   81.89   15.30
  -9  13   3   65.09   13.20
   8 -13  -3  113.09   15.00
  -8  13   3   88.79   13.40
   7 -13  -3  537.05   25.80
  -7  13   3  567.04   24.40
   6 -13  -3  589.94   25.90
  -6  13   3  614.64   24.80
   5 -13  -3 2546.15   65.69
  -5  13   3 2626.94   64.59
   4 -13  -3 1244.78   37.20
  -4  13   3 1230.18   35.80
   3 -13  -3  127.39   14.00
  -3 -13   3  102.89   10.40
  -3  13   3  102.29   12.90
   2 -13  -3  237.58   15.90
  -2 -13   3  261.47   11.60
  -2  13   3  252.87   18.10
  -2  13   3  248.08   15.20
  -1 -13   3   84.19    9.40
   1 -13  -3   83.29   13.30
   1 -13  -3  108.79   13.00
  -1  13   3  102.59   12.30
  -1  13   3   91.89   14.70
   0 -13  -3    6.70    8.30
   0 -13  -3   -9.10    7.50
   0 -13   3    6.80    5.70
   0  13   3    1.50    8.80
   0  13  -3    2.40    8.10
   0  13   3  -10.50    7.40
   1 -13   3 2729.13   64.09
  -1 -13  -3 2659.83   61.99
  -1 -13  -3 2593.34   64.09
  -1  13  -3 2666.33   65.59
   1  13   3 2533.55   62.19
   1  13   3 2622.64   61.79
  -2 -13  -3  915.41   26.80
  -2 -13  -3  932.31   29.20
   2  13   3  950.60   28.40
   2  13   3  891.51   27.40
  -2  13  -3  920.71   30.20
  -3 -13  -3  715.53   25.50
   3  13   3  725.23   23.50
  -3  13  -3  723.53   26.50
  -4 -13  -3  530.75   21.80
  -4  13  -3  509.75   22.50
   4  13   3  490.35   19.40
  -5 -13  -3  288.47   18.10
  -5  13  -3  305.27   19.30
   5  13   3  304.17   17.60
  -6 -13  -3   68.19   12.10
  -6  13  -3   65.59   12.10
   6  13   3   59.49    9.80
  -7 -13  -3 4594.14  104.99
  -7  13  -3 4431.16  106.29
   7  13   3 4302.87  100.19
  -8 -13  -3  418.96   23.80
   8  13   3  411.36   25.50
  -8  13  -3  435.36   24.30
  -9 -13  -3   63.29   14.70
   9 -13   3   57.69   16.30
  -9  13  -3   58.39   13.80
 -10 -13  -3    6.60   13.90
  10 -13   3   43.10   16.80
 -10  13  -3   43.70   14.20
  11 -13   3  101.29   20.20
 -11 -13  -3   76.29   16.90
 -11  13  -3   66.49   16.30
 -12 -13  -3  107.19   18.60
  12 -13   3   32.90   19.20
 -12  13  -3   70.99   17.00
  12  13   3   69.69   18.40
 -13 -13  -3 1202.38   45.50
  13 -13   3 1002.60   50.49
 -13  13  -3 1041.10   44.70
 -14 -13  -3   32.80   19.00
  14 -13   3   14.30   20.10
 -14  13  -3    8.50   16.10
  15 -13   3   18.90   21.40
 -15  13  -3   -1.10   17.60
  16 -13   3   -1.70   20.00
 -16  13  -3    5.80   18.50
  18 -14  -3  499.15   43.50
 -18  14   3  569.94   42.70
  17 -14  -3   12.40   21.00
 -17  14   3   19.20   20.10
  16 -14  -3  336.17   36.20
 -16  14   3  253.77   31.20
  15 -14  -3  191.98   31.60
 -15  14   3  267.87   29.20
  14 -14  -3  217.28   29.50
 -14  14   3  191.28   26.60
  13 -14  -3  283.27   29.30
 -13  14   3  215.58   25.70
  12 -14  -3  966.00   42.50
 -12  14   3  956.00   39.60
  11 -14  -3   69.89   16.70
 -11  14   3   39.50   14.00
  10 -14  -3  282.57   24.30
 -10  14   3  291.67   22.40
   9 -14  -3  695.43   32.00
  -9  14   3  666.93   30.20
   8 -14  -3  249.58   21.20
  -8  14   3  248.58   20.00
   7 -14  -3  492.05   25.60
  -7  14   3  529.95   24.20
   6 -14  -3  697.93   28.70
  -6  14   3  749.42   27.80
   5 -14  -3  124.59   16.20
  -5  14   3  112.29   14.90
   4 -14  -3 1562.04   44.60
  -4  14   3 1628.64   44.00
   3 -14  -3  699.33   25.80
  -3 -14   3  739.43   21.80
  -3  14   3  769.62   25.90
   2 -14  -3   48.00    9.60
  -2 -14   3   53.89    8.90
  -2  14   3   35.30    9.00
   1 -14  -3 2024.70   50.79
   1 -14  -3 2007.10   52.39
  -1 -14   3 2064.39   48.40
  -1  14   3 1954.50   51.09
  -1  14   3 2034.30   50.89
   0 -14  -3 2177.88   52.79
   0 -14   3 1998.10   51.39
   0 -14  -3 2146.39   54.19
   0  14   3 2112.39   52.89
   0  14  -3 2176.08   55.69
   0  14   3 2158.58   52.79
  -1 -14  -3    1.90    8.90
  -1 -14  -3   15.50    8.30
   1  14   3   10.50    8.20
  -1  14  -3    9.80    9.10
   1  14   3    8.80    9.30
  -2 -14  -3 2480.85   61.99
  -2 -14  -3 2501.65   59.29
  -2  14  -3 2475.65   63.59
   2  14   3 2596.24   59.49
   2  14   3 2520.75   61.09
  -3 -14  -3 1527.55   41.70
   3  14   3 1511.65   38.40
  -3  14  -3 1432.16   42.60
  -4 -14  -3  455.15   21.20
   4  14   3  470.25   20.00
  -4  14  -3  430.26   21.90
  -5 -14  -3 1780.92   48.20
  -5  14  -3 1762.12   49.99
   5  14   3 1795.22   44.60
  -6 -14  -3  608.04   25.70
   6  14   3  584.34   21.70
  -6  14  -3  595.04   26.20
  -7 -14  -3   46.00   12.80
  -7  14  -3   59.89   12.70
   7  14   3   50.79    9.90
  -8 -14  -3   27.60   13.00
   8 -14   3   72.89   16.00
  -8  14  -3   49.60   13.30
   8  14   3   39.10   12.40
  -9 -14  -3 1892.61   54.69
   9 -14   3 1871.41   60.39
  -9  14  -3 1790.22   55.59
 -10 -14  -3    8.50   14.00
  10 -14   3   22.40   16.50
 -10  14  -3   30.30   14.00
 -11 -14  -3  554.04   30.30
  11 -14   3  561.04   35.40
 -11  14  -3  599.34   31.90
  12 -14   3    9.20   17.00
 -12 -14  -3    2.30   15.60
 -12  14  -3   -8.30   14.30
 -13 -14  -3   97.49   19.80
  13 -14   3  139.99   24.60
 -13  14  -3  196.18   26.70
  14 -14   3    9.30   19.70
 -14  14  -3   32.30   17.80
  15 -14   3  381.66   39.00
 -15  14  -3  363.36   34.00
  16 -14   3   21.40   21.30
 -16  14  -3   45.90   20.80
  18 -15  -3   -2.20   20.00
 -18  15   3    6.50   20.80
  17 -15  -3  114.49   25.90
 -17  15   3   74.29   22.10
  16 -15  -3   62.79   21.70
 -16  15   3   29.10   18.80
  15 -15  -3   -1.70   17.50
 -15  15   3   33.70   18.10
  14 -15  -3 1028.70   48.40
 -14  15   3 1024.30   45.70
  13 -15  -3  179.48   26.80
 -13  15   3  180.58   24.00
  12 -15  -3   53.99   16.90
 -12  15   3   38.50   14.60
  11 -15  -3  243.28   25.00
 -11  15   3  268.37   23.70
  10 -15  -3   63.99   15.20
 -10  15   3   36.20   13.10
   9 -15  -3   72.89   15.20
  -9  15   3   49.00   13.40
   8 -15  -3 2827.02   77.39
  -8  15   3 3019.60   76.19
   7 -15  -3  739.13   31.10
  -7  15   3  756.42   29.60
   6 -15  -3   14.60   10.80
  -6  15   3    5.00    9.70
   5 -15  -3 1400.76   42.40
  -5  15   3 1415.86   41.40
   4 -15  -3  228.88   17.50
  -4  15   3  224.18   16.70
   3 -15  -3  179.18   15.70
  -3 -15   3  185.68   12.00
  -3  15   3  175.28   15.30
  -2 -15   3 3195.18   69.59
   2 -15  -3 2991.70   73.49
  -2  15   3 3024.30   73.59
   1 -15  -3 1121.19   33.90
   1 -15  -3 1188.58   35.90
  -1  15   3 1237.98   35.90
  -1  15   3 1195.68   34.80
   0 -15  -3   -0.60    8.20
   0 -15   3   20.50    7.50
   0 -15  -3   24.30    9.40
   0  15   3   20.10    8.70
   0  15  -3   12.30    9.10
   0  15   3   11.50   10.30
  -1 -15  -3  323.07   16.20
  -1 -15  -3  298.37   18.00
  -1  15  -3  302.97   19.10
   1  15   3  332.97   17.90
   1  15   3  335.07   17.80
  -2 -15  -3    2.10    7.80
  -2 -15  -3    2.00    9.00
   2  15   3   20.80    9.00
  -2  15  -3   -0.80    8.80
   2  15   3    5.70    8.90
  -3 -15  -3  608.64   24.40
   3  15   3  647.44   22.60
  -3  15  -3  617.34   25.70
  -4 -15  -3  849.61   29.60
  -4  15  -3  847.72   31.20
   4  15   3  883.71   26.70
  -5 -15  -3 1508.65   42.50
  -5  15  -3 1440.76   44.20
   5  15   3 1451.05   38.00
  -6 -15  -3  460.75   23.20
   6  15   3  453.95   19.10
  -6  15  -3  439.06   23.70
  -7 -15  -3 1070.59   35.90
   7  15   3 1021.90   30.50
  -7  15  -3 1028.20   37.00
  -8 -15  -3  181.68   19.90
   8 -15   3  207.38   23.50
  -8  15  -3  148.59   20.80
   9 -15   3  655.93   34.90
  -9 -15  -3  621.84   29.90
  -9  15  -3  633.94   31.20
  10 -15   3  339.87   29.90
 -10 -15  -3  392.76   25.40
 -10  15  -3  342.57   25.60
 -11 -15  -3  310.57   25.20
  11 -15   3  301.47   30.10
 -11  15  -3  279.27   25.50
 -12 -15  -3    1.30   15.60
  12 -15   3  -31.10   14.80
 -12  15  -3    5.20   15.30
 -13 -15  -3  255.17   27.20
  13 -15   3  307.27   33.60
 -13  15  -3  308.17   29.40
  14 -15   3    8.00   20.00
 -14  15  -3   -6.00   15.70
  15 -15   3  365.66   38.70
 -15  15  -3  369.36   33.80
  16 -15   3    9.40   20.50
 -16  15  -3   -8.40   18.80
  18 -16  -3   45.90   24.30
 -18  16   3  102.49   25.60
  17 -16  -3  543.45   43.60
 -17  16   3  535.35   40.70
  16 -16  -3  283.57   35.40
 -16  16   3  234.38   31.30
  15 -16  -3   23.50   18.30
 -15  16   3   10.20   17.70
  14 -16  -3  141.99   24.50
 -14  16   3  159.88   26.20
  13 -16  -3  127.59   21.60
 -13  16   3   82.09   18.20
  12 -16  -3  493.75   33.30
 -12  16   3  501.65   30.10
  11 -16  -3  590.14   33.80
 -11  16   3  590.94   31.00
  10 -16  -3  213.28   23.90
 -10  16   3  194.18   21.70
   9 -16  -3   86.79   15.50
  -9  16   3   64.69   14.20
   8 -16  -3   14.10   11.90
  -8  16   3   18.40   11.30
   7 -16  -3 1256.57   42.10
  -7  16   3 1247.18   40.50
   6 -16  -3  427.16   24.10
  -6  16   3  447.56   22.90
   5 -16  -3 1547.95   46.10
  -5  16   3 1594.34   45.40
   4 -16  -3 2056.49   56.39
  -4  16   3 2188.18   56.29
   3 -16  -3  180.38   16.10
  -3 -16   3  162.98    9.60
  -3  16   3  174.68   15.70
  -2 -16   3   61.79    7.90
   2 -16  -3   68.39   11.00
  -2  16   3   72.99   10.80
   1 -16  -3  758.62   26.00
   1 -16  -3  739.73   27.70
  -1  16   3  748.83   26.70
  -1  16   3  798.72   31.60
   1  16  -3  733.63   28.70
   0 -16   3   30.30    8.30
   0 -16  -3   29.80   10.10
   0 -16  -3   42.40    9.60
   0  16   3   48.70    9.80
   0  16   3   23.70   11.30
   0  16  -3   26.50   10.10
  -1 -16  -3  592.44   23.90
  -1 -16  -3  580.04   21.50
   1  16   3  610.04   23.10
   1  16   3  618.04   23.60
  -1  16  -3  596.04   25.30
  -2 -16  -3  794.62   24.70
  -2 -16  -3  779.72   27.70
   2  16   3  811.82   26.10
  -2  16  -3  792.62   29.50
   2  16   3  761.62   27.20
  -3 -16  -3   19.40    8.30
  -3 -16  -3   14.10   10.00
   3  16   3   17.00   10.10
  -3  16  -3   12.10   10.30
  -4 -16  -3  129.29   15.80
  -4  16  -3  123.59   16.80
  -5 -16  -3  287.47   19.60
  -5  16  -3  272.57   20.50
  -6 -16  -3  146.59   17.90
  -6  16  -3  105.79   17.60
  -7 -16  -3  368.96   22.70
   7 -16   3  365.66   26.30
  -7  16  -3  353.76   23.70
   8 -16   3 2295.57   67.79
  -8 -16  -3 2285.07   61.69
  -8  16  -3 2228.68   64.39
   9 -16   3   87.19   18.80
  -9 -16  -3  110.89   16.50
  -9  16  -3  118.79   17.50
 -10 -16  -3   -9.20   13.70
  10 -16   3   -7.40   14.80
 -10  16  -3    0.30   13.10
 -11 -16  -3  125.59   18.30
  11 -16   3  144.49   23.30
 -11  16  -3  119.19   18.40
 -12 -16  -3  186.78   23.90
  12 -16   3  182.08   29.00
 -12  16  -3  166.28   22.50
  13 -16   3   -7.80   18.20
 -13  16  -3    9.80   16.00
  14 -16   3  406.56   37.60
 -14  16  -3  373.96   32.50
  15 -16   3  117.99   26.30
 -15  16  -3  235.08   32.10
  16 -16   3   28.80   23.10
 -16  16  -3   32.10   20.90
  18 -17  -3   52.69   24.30
 -18  17   3   21.10   21.60
  17 -17  -3    0.30   20.40
 -17  17   3   62.59   22.20
  16 -17  -3  153.18   26.30
 -16  17   3  102.09   22.30
  15 -17  -3  467.75   37.80
 -15  17   3  466.55   36.00
  14 -17  -3  309.27   33.80
 -14  17   3  322.47   30.00
  13 -17  -3  112.89   21.80
 -13  17   3  115.79   19.30
  12 -17  -3  100.89   19.40
 -12  17   3   34.70   15.10
  11 -17  -3   19.30   14.20
 -11  17   3    2.50   12.80
  10 -17  -3 1033.50   42.20
 -10  17   3 1088.29   41.30
   9 -17  -3  187.18   22.30
  -9  17   3  170.58   20.40
   8 -17  -3  977.20   38.20
  -8  17   3  954.10   36.20
   7 -17  -3  312.07   23.00
  -7  17   3  290.57   21.20
   6 -17  -3   36.20   11.70
  -6  17   3   21.80   10.80
   5 -17  -3  126.19   17.10
  -5  17   3  108.39   15.80
   4 -17  -3  533.75   24.30
  -4  17   3  493.35   23.30
  -3 -17   3   37.10    6.20
  -3 -17   3   19.30    7.70
   3 -17  -3   22.50   10.30
  -3  17   3   29.40   10.10
   2 -17  -3  290.77   17.90
  -2 -17   3  275.27   13.30
  -2  17   3  294.37   18.30
   1 -17  -3 1117.29   35.00
   1 -17  -3 1076.99   32.90
  -1  17   3 1051.49   33.80
   1  17  -3 1056.09   35.60
   0 -17  -3  323.07   19.00
   0 -17  -3  300.57   17.30
   0  17   3  336.47   18.90
   0  17  -3  337.17   20.70
   0  17   3  303.87   20.20
  -1 -17  -3   15.30    8.80
  -1 -17  -3    2.90    9.50
  -1  17  -3   28.80   11.00
   1  17   3    9.70   11.40
   1  17   3   31.80    9.70
  -2 -17  -3 1518.45   39.70
  -2 -17  -3 1579.84   43.70
   2  17   3 1532.45   40.90
   2  17   3 1562.14   43.10
  -2  17  -3 1467.75   45.10
  -3 -17  -3  253.37   14.60
  -3 -17  -3  300.57   18.60
   3  17   3  271.17   17.00
  -3  17  -3  300.87   20.30
   3  17   3  276.97   18.70
  -4 -17  -3  217.28   17.40
  -4  17  -3  218.68   19.30
  -5 -17  -3 1338.77   40.70
  -5  17  -3 1357.26   43.60
  -6 -17  -3  190.38   19.10
   6 -17   3  215.08   21.90
  -6  17  -3  211.78   20.10
   7 -17   3  191.48   23.50
  -7 -17  -3  144.29   19.20
  -7  17  -3  134.49   19.40
   8 -17   3 1151.78   46.40
  -8 -17  -3 1238.68   40.30
  -8  17  -3 1224.28   43.60
  -9 -17  -3  231.28   22.30
   9 -17   3  231.98   26.90
  -9  17  -3  189.38   23.00
 -10 -17  -3  138.29   21.80
  10 -17   3  168.28   23.50
 -10  17  -3  140.49   23.30
  11 -17   3  241.58   29.90
 -11 -17  -3  233.38   23.50
 -11  17  -3  278.47   27.00
 -12 -17  -3  425.76   29.30
  12 -17   3  357.26   34.30
 -12  17  -3  432.86   31.10
[truncated: 4,736,034 more chars]
